# Supplementary material for: Catalytic base-controlled regiodivergent heteronucleophilic hydrofunctionalization of β,γ-unsaturated amides
Source: Royal Society of Chemistry journal article supplement (doi:10.1039/d1cc03440e), 2021-01-01

## Supporting Information

### Catalytic base-controlled regiodivergent heteronucleophilic hydrofunctionalization of $\beta,\gamma$ -unsaturated amides

Yao Zhao,<sup>a</sup> Jiacheng Rui,<sup>a</sup> Qiang Du,<sup>a</sup> Rizhi Chen,<sup>b</sup> Ying Zhan,<sup>a</sup> Xintao Zheng,<sup>a</sup> Xiaojin Wu<sup>a,\*</sup>

<sup>a</sup> Institute of Advanced Synthesis, School of Chemistry and Molecular Engineering, Nanjing Tech University, Nanjing 211816, P. R. China

<sup>b</sup> State Key Laboratory of Materials-Oriented Chemical Engineering, Nanjing Tech University, Nanjing 211816, P. R. China

\*E-mail: iamxiaojinwu@njtech.edu.cn

### Table of Contents

I. General

II. Condition optimization for the model reaction

III. Synthesis of alkene substrates

IV. Base-catalyzed reactions of various nucleophiles and alkenes

V. Gram-scale reaction

VI. Study on reaction progress

VII. Reference

VIII. NMR spectra

## I. General

$^1\text{H}$  NMR spectra were acquired on Jeol 400 MHz spectrometers and chemical shifts were recorded relative to tetramethylsilane ( $\delta$  0.00) or residual protiated solvent ( $\text{CDCl}_3$ :  $\delta$  7.26). Multiplicities were given as: s (singlet), d (doublet), t (triplet), q (quartet) and m (multiplet). The number of protons (n) for a given resonance was indicated by nH. Coupling constants were reported as a  $J$  value in Hz.  $^{13}\text{C}$  NMR spectra were obtained at 100 MHz on 400 MHz instruments and chemical shifts were recorded relative to solvent resonance ( $\text{CDCl}_3$ :  $\delta$  77.16).  $^{31}\text{P}$  NMR spectra were obtained at 162 MHz on 400 MHz instrument. Proof of purity of new compounds was demonstrated with copies of  $^1\text{H}$ ,  $^{13}\text{C}$ ,  $^{31}\text{P}$  and  $^{19}\text{F}$  NMR spectra.

Glassware was dried in an oven at 120 °C for at least 2 hours before use. Unless noted otherwise, commercially available chemicals were used without further purification. The GC standard, *n*-dodecane was degassed with argon bubbling and dried over activated 4 Å molecular sieve beads for a few days in the glove box before use.

Thin-layer chromatography (TLC) was conducted with Merck 60 F254 coated silica gel plate (0.2 mm thickness). Flash chromatography was performed using Merck silica gel 60 (0.040-0.063 mm) or SiliCycle silica gel F60 (0.040-0.063 mm). The dilute solvents usually used Ethyl Acetate/Petroleum Ether, which was abbreviated as EA:PE.

GCMS analysis was conducted on a Thermo Scientific DSQ II single quadrupole GC/MS instrument with Agilent J & W GC column DB-5MS-UI. ESI/MS analysis was conducted on a ThermoFinnigan LCQ Fleet MS spectrometer. Gas chromatographic (GC) analysis was performed on a SHIMADZU GC-2010 plus instrument equipped with an FID detector and a Agilent J & W GC column DB-5MS-UI.

## II. Condition optimization for the Model Reaction

*Typical procedure for condition optimization:* To a dry 10-mL Schlenk tube containing a magnetic stir bar was added alkenes **1a** (1 equiv, 0.1 mmol, 16.1 mg), catalytic base, nucleophilic reagent **2a** (10 equiv, 1 mmol, 76 mg) were added sequentially. The tube was capped tightly and the mixture was vigorously stirred in a *pre-warmed* 80 °C oil bath. After 24 hours, 10 uL dodecane was added in the tube. After filtering, the filtrate was subjected to GC analysis to determine the conversion of alkenes **1a**, calibrated GC yield of the coupling product. The major byproducts from alkene are the mixture of isomerized *cis/trans* alkenes and removed aniline group.

**Table S1 Effect of base catalysts**

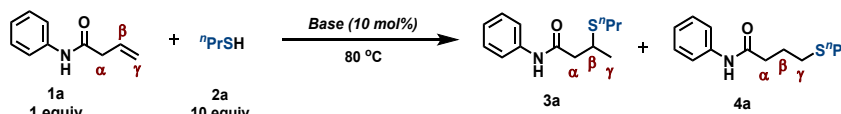

| Entry | Base                            | Alkene ( <b>1a</b> )<br>/Conversion (%) | Yield of <b>3a</b> (%) | Yield of <b>4a</b> (%) |
|-------|---------------------------------|-----------------------------------------|------------------------|------------------------|
| 1     | NaHCO <sub>3</sub>              | 100                                     | 1                      | 90                     |
| 2     | Cs <sub>2</sub> CO <sub>3</sub> | 100                                     | 88                     | 2                      |
| 3     | Li <sub>2</sub> CO <sub>3</sub> | 97                                      | 1                      | 66                     |
| 4     | Na <sub>2</sub> CO <sub>3</sub> | 100                                     | 2                      | 83                     |
| 5     | K <sub>2</sub> CO <sub>3</sub>  | 100                                     | 29                     | 50                     |
| 6     | NaOAc                           | 60                                      | 3                      | 23                     |
| 7     | KOAc                            | 94                                      | 2                      | 81                     |
| 8     | LiOAc                           | 100                                     | 2                      | 85                     |
| 9     | CsOAc                           | 83                                      | 2                      | 75                     |
| 10    | KHCO <sub>3</sub>               | 100                                     | 6                      | 78                     |
| 11    | EtONa                           | 97                                      | 2                      | 71                     |
| 12    | CsF                             | 100                                     | 71                     | 24                     |
| 13    | LiF                             | 97                                      | 1                      | 88                     |
| 14    | KF                              | 94                                      | 2                      | 65                     |
| 15    | NaF                             | 98                                      | 1                      | 86                     |
| 16    | NaI                             | 96                                      | 2                      | 87                     |
| 17    | KI                              | 97                                      | 1                      | 71                     |
| 18    | K <sub>3</sub> PO <sub>4</sub>  | 100                                     | 61                     | 12                     |
| 19    | K <sub>2</sub> HPO <sub>4</sub> | 100                                     | 2                      | 83                     |
| 20    | KH <sub>2</sub> PO <sub>4</sub> | 78                                      | 2                      | 67                     |
| 21    | CF <sub>3</sub> COONa           | 100                                     | 1                      | 77                     |
| 22    | CsOH·H <sub>2</sub> O           | 78                                      | 23                     | 20                     |
| 23    | NaOH                            | 100                                     | 87                     | 2                      |
| 24    | KOH                             | 100                                     | 77                     | 14                     |
| 25    | <sup>t</sup> BuOK               | 100                                     | 88                     | 6                      |
| 26    | <sup>t</sup> BuONa              | 100                                     | 89                     | 3                      |
| 27    | <sup>t</sup> BuOLi              | 100                                     | 62                     | 31                     |
| 28    | CH <sub>3</sub> ONa             | 100                                     | 2                      | 89                     |
| 29    | CH <sub>3</sub> OK              | 100                                     | 1                      | 85                     |
| 30    | CH <sub>3</sub> OLi             | 100                                     | 25                     | 64                     |
| 31    | /                               | 86                                      | 1                      | 71                     |

**Table S2 Effect of amount of nucleophilic reagent**

| Entry    | RSH/ equiv | Alkene (1a)<br>/Conversion (%) | Yield of 3a (%) | Yield of 4a (%) |
|----------|------------|--------------------------------|-----------------|-----------------|
| 1        | 1          | 19                             | 1               | 8               |
| 2        | 2          | 60                             | 3               | 41              |
| 3        | 3          | 75                             | 2               | 53              |
| 4        | 4          | 95                             | 1               | 59              |
| 5        | 5          | 98                             | 2               | 76              |
| <b>6</b> | <b>10</b>  | <b>100</b>                     | <b>1</b>        | <b>90</b>       |
| 7        | 20         | 100                            | 3               | 85              |

**Table S3-1 Effect of catalyst loading**

| Entry    | Catalyst loading | Alkene (1a)<br>/Conversion (%) | Yield of 3a (%) | Yield of 4a (%) |
|----------|------------------|--------------------------------|-----------------|-----------------|
| 1        | 2%               | 100                            | 1               | 78              |
| 2        | 4%               | 100                            | 2               | 87              |
| 3        | 6%               | 100                            | 2               | 88              |
| 4        | 8%               | 100                            | 2               | 88              |
| <b>5</b> | <b>10%</b>       | <b>100</b>                     | <b>1</b>        | <b>90</b>       |

**Table S3-2 Effect of catalyst loading**

| Entry    | Catalyst loading | Alkene (1a)<br>/Conversion (%) | Yield of 3a (%) | Yield of 4a (%) |
|----------|------------------|--------------------------------|-----------------|-----------------|
| 1        | 2%               | 100                            | 67              | 23              |
| 2        | 4%               | 100                            | 80              | 11              |
| 3        | 6%               | 100                            | 84              | 7               |
| 4        | 8%               | 100                            | 89              | 4               |
| <b>5</b> | <b>10%</b>       | <b>100</b>                     | <b>88</b>       | <b>2</b>        |
| 6        | 20%              | 100                            | 88              | 2               |

**Table S4-1 Effect of temperature**

| Entry    | Temperature | Alkene (1a)<br>/Conversion (%) | Yield of 3a (%) | Yield of 4a (%) |
|----------|-------------|--------------------------------|-----------------|-----------------|
| 1        | R.T.        | 50                             | 0               | 45              |
| 2        | 40          | 91                             | 1               | 75              |
| 3        | 60          | 100                            | 1               | 87              |
| <b>4</b> | <b>80</b>   | <b>100</b>                     | <b>1</b>        | <b>90</b>       |
| 5        | 100         | 100                            | 1               | 83              |

**Table S4-2 Effect of temperature**



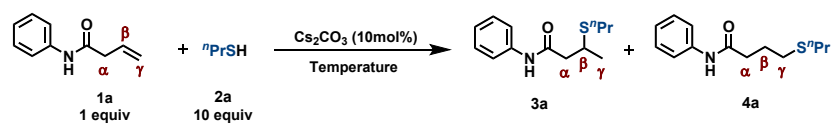

| Entry    | Temperature | Alkene ( <b>1a</b> )<br>/Conversion (%) | Yield of <b>3a</b> (%) | Yield of <b>4a</b> (%) |
|----------|-------------|-----------------------------------------|------------------------|------------------------|
| 1        | R.T.        | 7                                       | 1                      | 1                      |
| 2        | 40          | 29                                      | 8                      | 8                      |
| 3        | 60          | 100                                     | 74                     | 16                     |
| 4        | 70          | 100                                     | 84                     | 8                      |
| <b>5</b> | <b>80</b>   | <b>100</b>                              | <b>88</b>              | <b>2</b>               |
| 6        | 90          | 100                                     | 89                     | 2                      |
| 7        | 100         | 100                                     | 88                     | 2                      |

### III. Synthesis of alkene substrates

Table S5. Alkene substrates 1a-1l

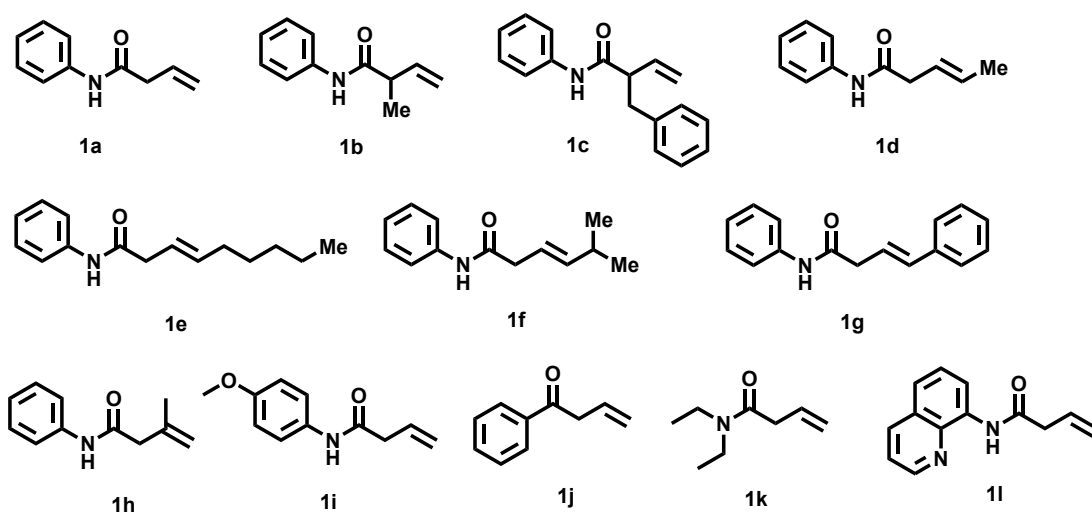

Note: alkene substrates 1a<sup>1</sup>, 1d<sup>2</sup>, 1f<sup>3</sup>, 1g<sup>4</sup>, 1h<sup>5</sup>, 1i<sup>6</sup>, 1j<sup>1</sup>, 1k<sup>7</sup>, 1l<sup>8</sup>, were prepared according to the corresponding literature methods.

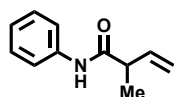

**2-methyl-*N*-phenylbut-3-enamide (1b):** 2-methylbut-3-enoic acid was prepared according to the literature<sup>9</sup>. 2-methylbut-3-enoic acid (500 mg, 5 mmol) was charged into a 50 mL RB flask containing 20 mL DCM at 0 °C. Aniline (418 mg, 4.5 mmol), EDCI (958 mg, 5 mmol), HOBt (765 mg, 5 mmol), and DMAP (56 mg, 0.45 mmol) were added sequentially, and the reaction was stirred at 0 °C for 16 h. The solution was diluted with DCM (100 mL), washed with sat. NaHCO<sub>3</sub> (100 mL, ×2) and brine (100 mL, ×1), and purified by column chromatography (EA: PE=1: 5) to afford 700 mg (89%) yield of product as a white solid.

<sup>1</sup>H NMR (400 MHz, CDCl<sub>3</sub>): δ 7.52-7.50 (m, 2H), 7.34-7.29 (m, 3H), 7.12-7.08 (m, 1H), 6.04-5.95 (m, 1H), 5.35-5.27 (m, 2H), 3.18-3.14 (m, 1H), 1.37 (d, *J* = 7.0 Hz, 3H).

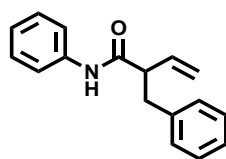

**2-benzyl-*N*-phenylbut-3-enamide (1c):** 2-benzylbut-3-enoic acid was prepared according to the literature<sup>10</sup>. 2-benzylbut-3-enoic acid (880 mg, 5 mmol) was charged

into a 50 mL RB flask containing 20 mL DCM at 0 °C. Aniline (418 mg, 4.5 mmol), EDCI (958 mg, 5 mmol), HOBT (765 mg, 5 mmol), and DMAP (56 mg, 0.45 mmol) were added sequentially, and the reaction was stirred at 0 °C for 16 h. The solution was diluted with DCM (100 mL), washed with sat. NaHCO<sub>3</sub> (100 mL, ×2) and brine (100 mL, ×1), and purified by column chromatography (EA: PE=1: 5) to afford 926 mg (82%) yield of product as a white solid.

<sup>1</sup>H NMR (400 MHz, CDCl<sub>3</sub>): δ 7.42-7.40 (m, 2H), 7.31-7.28 (m, 4H), 7.22-7.19 (m, 3H), 7.09 (t, *J* = 7.4 Hz, 1H), 6.02-5.93 (m, 1H), 5.25-5.19 (m, 2H), 3.32-3.20 (m, 2H), 2.93-2.88 (m, 1H).

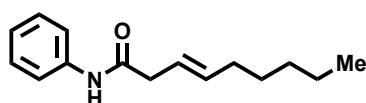

**(E)-N-phenylnon-3-enamide (1e):** (E)-non-3-enoic acid was prepared according to the literature<sup>3</sup>. (E)-non-3-enoic acid (780 mg, 5 mmol) was charged into a 50 mL RB flask containing 20 mL DCM at 0 °C. Aniline (418 mg, 4.5 mmol), EDCI (958 mg, 5 mmol), HOBT (765 mg, 5 mmol), and DMAP (56 mg, 0.45 mmol) were added sequentially, and the reaction was stirred at 0 °C for 16 h. The solution was diluted with DCM (100 mL), washed with sat. NaHCO<sub>3</sub> (100 mL, ×2) and brine (100 mL, ×1), and purified by column chromatography (EA: PE=1: 5) to afford 883 mg (85%) yield of product as a white solid.

<sup>1</sup>H NMR (400 MHz, CDCl<sub>3</sub>): δ 7.51-7.49 (m, 2H), 7.35 (s, 1H), 7.34-7.30 (m, 2H), 7.13-7.08 (m, 1H), 5.78-5.71 (m, 1H), 5.66-5.58 (m, 1H), 3.11 (dd, *J* = 7.0, 1.1 Hz, 2H), 2.11 (q, *J* = 6.9 Hz, 2H), 1.46-1.39 (m, 2H), 1.36-1.29 (m, 4H), 0.89 (t, *J* = 6.9 Hz, 3H).

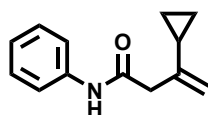

**3-cyclopropyl-N-phenylbut-3-enamide (11a):** 3-cyclopropylbut-3-enoic acid was prepared according to the literature<sup>11</sup>. 3-cyclopropylbut-3-enoic acid (25.2 mg, 0.20 mmol) was charged into a 5 mL RB flask containing 2 mL DCM at 0 °C. Aniline (17 mg, 0.18 mmol), EDCI (38 mg, 0.2 mmol), HOBT (31 mg, 0.2 mmol), and DMAP (2.3 mg, 0.02 mmol) were added sequentially, and the reaction was stirred at 0 °C for 16 h. The solution was diluted with DCM (5 mL), washed with sat. NaHCO<sub>3</sub> (5 mL, ×2)

and brine (5 mL,  $\times 1$ ), and purified by column chromatography (EA: PE=1: 5) to afford 28.1 mg (70%) yield of product as a yellow oil.

$^1\text{H}$  NMR (400 MHz,  $\text{CDCl}_3$ ):  $\delta$  7.55 (s, 1H), 7.52-7.49 (m, 2H), 7.35-7.30 (m, 2H), 7.13-7.09 (m, 1H), 5.04-4.98 (m, 2H), 3.13 (d,  $J = 0.9$  Hz, 2H), 1.49-1.42 (m, 1H), 0.77-0.72 (m, 2H), 0.57-0.53 (m, 3H).

#### IV. Base-catalyzed reactions of various nucleophiles and alkenes

*General Procedure A:* To a dry 10-mL Schlenk tube containing a magnetic stir bar was charged with alkenes (1 equiv, 0.1 mmol, 16.1 mg), Cs<sub>2</sub>CO<sub>3</sub> (10 mol%, 0.01 mmol, 3.3 mg), nucleophilic reagent (10 equiv, 1 mmol) sequentially. The tube was capped tightly and the mixture was vigorously stirred in a pre-warmed 80 °C oil bath. After alkenes was almost fully consumed (monitored by GC), the reaction mixture was concentrated on a rotary evaporator, then the resulting residue was directly subjected to preparative TLC. The structure of the desired product was confirmed by <sup>1</sup>H and <sup>13</sup>C NMR spectroscopy of the purified sample. The typical procedure using 0.1 mmol of alkenes was applied for all the isolation, unless stated otherwise.

*General Procedure B:* To a dry 10-mL Schlenk tube containing a magnetic stir bar was charged with alkenes (1 equiv, 0.1 mmol, 16.1 mg), NaHCO<sub>3</sub> (10 mol%, 0.01 mmol, 0.8 mg), nucleophilic reagent (10 equiv, 1mmol) sequentially. The tube was capped tightly and the mixture was vigorously stirred in a pre-warmed 80 °C oil bath. After alkenes was almost fully consumed (monitored by GC), the reaction mixture was concentrated on a rotary evaporator, then the resulting residue was directly subjected to preparative TLC. The structure of the desired product was confirmed by <sup>1</sup>H and <sup>13</sup>C NMR spectroscopy of the purified sample. The typical procedure using 0.1 mmol of alkenes was applied for all the isolation, unless stated otherwise.

*General Procedure C:* To a dry 10-mL Schlenk tube containing a magnetic stir bar was charged with alkenes (1 equiv, 0.1 mmol, 16.1 mg), CH<sub>3</sub>OLi (20 mol%, 0.02 mmol, 0.8 mg), nucleophilic reagent (2 equiv, 0.2 mmol) and THF (0.1 mL) sequentially. The tube was capped tightly and the mixture was vigorously stirred in a pre-warmed 100 °C oil bath. After alkenes was almost fully consumed (monitored by GC), the reaction mixture was concentrated on a rotary evaporator, then the resulting residue was directly subjected to preparative TLC. The structure of the desired product was confirmed by <sup>1</sup>H and <sup>13</sup>C NMR spectroscopy of the purified sample. The typical procedure using 0.1 mmol of alkenes was applied for all the isolation, unless stated otherwise.

*General Procedure D:* To a dry 10-mL Schlenk tube containing a magnetic stir bar was charged with alkenes (1 equiv, 0.1 mmol, 16.1 mg), Na<sub>3</sub>PO<sub>4</sub> (10 mol%, 0.01 mmol, 1.6 mg), nucleophilic reagent (2 equiv, 0.2 mmol) and THF (0.1 mL) sequentially. The tube was capped tightly and the mixture was vigorously stirred in a pre-warmed 100 °C oil bath. After alkenes was almost fully consumed (monitored by GC), the reaction mixture

was concentrated on a rotary evaporator, then the resulting residue was directly subjected to preparative TLC. The structure of the desired product was confirmed by  $^1\text{H}$  and  $^{13}\text{C}$  NMR spectroscopy of the purified sample. The typical procedure using 0.1 mmol of alkenes was applied for all the isolation, unless stated otherwise.

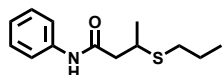

***N*-phenyl-3-(propylthio)butanamide (3a).** The reaction was conducted according to general procedure A, the reaction mixture was stirred at 80 °C for 6 hours. The product was purified by preparative TLC (1:10 EA:PE) as colorless oil (21 mg, 88%).

$^1\text{H}$  NMR (400 MHz,  $\text{CDCl}_3$ ):  $\delta$  8.09 (s, 1H), 7.52 (d,  $J = 7.9$  Hz, 2H), 7.30 (t,  $J = 7.8$  Hz, 2H), 7.10 (t,  $J = 7.3$  Hz, 1H), 3.33-3.24 (m, 1H), 2.64-2.49 (m, 4H), 1.66-1.57 (m, 2H), 1.36 (d,  $J = 6.8$  Hz, 3H), 0.97 (t,  $J = 7.3$  Hz, 3H).

$^{13}\text{C}$  NMR (100 MHz,  $\text{CDCl}_3$ ):  $\delta$  169.42, 137.88, 129.07, 124.45, 120.10, 45.31, 37.00, 33.19, 23.15, 21.92, 13.67.

HRMS (ESI): Calcd for  $\text{C}_{13}\text{H}_{19}\text{NOS}$   $[\text{M}+\text{H}]^+$ : 238.1266, Found: 238.1268.

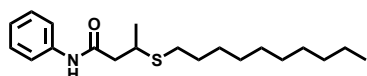

**3-(decylthio)-*N*-phenylbutanamide (3b).** The reaction was conducted according to general procedure A, the reaction mixture was stirred at 80 °C for 24 hours. The product was purified by preparative TLC (1:10 EA:PE) as white solid (26 mg, 77%).

$^1\text{H}$  NMR (400 MHz,  $\text{CDCl}_3$ ):  $\delta$  7.80 (s, 1H), 7.52 (d,  $J = 7.7$  Hz, 2H), 7.32 (t,  $J = 7.9$  Hz, 2H), 7.11 (t,  $J = 7.4$  Hz, 1H), 3.31-3.25 (m, 1H), 2.64-2.50 (m, 4H), 1.63-1.56 (m, 2H), 1.38 (d,  $J = 6.8$  Hz, 3H), 1.34-1.25 (m, 14H), 0.87 (t,  $J = 6.9$  Hz, 3H).

$^{13}\text{C}$  NMR (100 MHz,  $\text{CDCl}_3$ ):  $\delta$  169.16, 137.84, 129.11, 124.45, 119.95, 45.37, 37.12, 31.99, 31.28, 29.82, 29.65, 29.63, 29.42, 29.32, 29.09, 22.79, 21.97, 14.25.

HRMS (ESI): Calcd for  $\text{C}_{20}\text{H}_{33}\text{NOS}$   $[\text{M}+\text{H}]^+$ : 336.2361, Found: 336.2366.

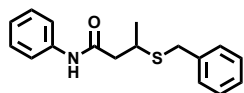

**3-(benzylthio)-*N*-phenylbutanamide (3c).** The reaction was conducted according to general procedure A, the reaction mixture was stirred at 80 °C for 24 hours. The product was purified by preparative TLC (1:10 EA:PE) as yellow oil (26 mg, 91%).

$^1\text{H}$  NMR (400 MHz,  $\text{CDCl}_3$ ):  $\delta$  7.73 (s, 1H), 7.48 (d,  $J = 8.1$  Hz, 2H), 7.35-7.29 (m, 6H), 7.26-7.22 (m, 1H), 7.11 (t,  $J = 7.4$  Hz, 1H), 3.84-3.76 (m, 2H), 3.27-2.18 (m, 1H), 2.58-2.44 (m, 2H), 1.35 (d,  $J = 6.9$  Hz, 3H).

$^{13}\text{C}$  NMR (100 MHz,  $\text{CDCl}_3$ ):  $\delta$  169.12, 138.34, 137.80, 129.07, 128.93, 128.76, 127.29, 124.47, 120.06, 45.15, 36.85, 35.72, 21.62.

HRMS (ESI): Calcd for  $\text{C}_{17}\text{H}_{19}\text{NOS}$   $[\text{M}+\text{H}]^+$ : 286.1266, Found: 286.1267.

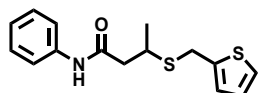

***N*-phenyl-3-((thiophen-2-ylmethyl)thio)butanamide (3d).** The reaction was conducted according to general procedure A, the reaction mixture was stirred at 80 °C for 24 hours. The product was purified by preparative TLC (1:10 EA:PE) as yellow solid (29 mg, 98%).

$^1\text{H}$  NMR (400 MHz,  $\text{CDCl}_3$ ):  $\delta$  7.51-7.49 (m, 3H), 7.35-7.30 (m, 2H), 7.21 (dd,  $J = 5.1, 1.3$  Hz, 1H), 7.13-7.09 (m, 1H), 6.98-6.96 (m, 1H), 6.93-6.91 (m, 1H), 4.08-3.98 (m, 2H), 3.33-3.24 (m, 1H), 2.61-2.47 (m, 2H), 1.38 (d,  $J = 6.8$  Hz, 3H).

$^{13}\text{C}$  NMR (100 MHz,  $\text{CDCl}_3$ ):  $\delta$  169.03, 141.83, 137.79, 129.08, 126.94, 126.33, 125.20, 124.50, 120.09, 45.12, 37.00, 30.13, 21.50.

HRMS (ESI): Calcd for  $\text{C}_{15}\text{H}_{17}\text{NOS}_2$   $[\text{M}+\text{H}]^+$ : 292.0830, Found: 292.0830.

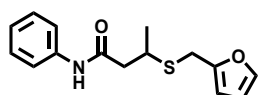

**3-((furan-2-ylmethyl)thio)-*N*-phenylbutanamide (3e).** The reaction was conducted according to general procedure A, the reaction mixture was stirred at 80 °C for 24 hours. The product was purified by preparative TLC (1:10 EA:PE) as yellow oil (25 mg, 92%).

$^1\text{H}$  NMR (400 MHz,  $\text{CDCl}_3$ ):  $\delta$  7.81 (s, 1H), 7.50 (d,  $J = 7.7$  Hz, 2H), 7.34-7.29 (m, 3H), 7.10 (t,  $J = 7.4$  Hz, 1H), 6.31-6.21 (m, 2H), 3.86-3.77 (m, 2H), 3.32-3.24 (m, 1H), 2.59-2.45 (m, 2H), 1.36 (d,  $J = 6.9$  Hz, 3H).

$^{13}\text{C}$  NMR (100 MHz,  $\text{CDCl}_3$ ):  $\delta$  169.07, 151.49, 142.29, 137.83, 129.08, 124.46, 120.04, 110.75, 107.83, 45.02, 37.15, 27.73, 21.54.

HRMS (ESI): Calcd for  $\text{C}_{15}\text{H}_{17}\text{NO}_2\text{S}$   $[\text{M}+\text{H}]^+$ : 276.1058, Found: 276.1059.

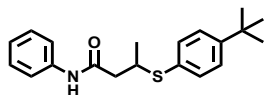

**3-((4-(tert-butyl)phenyl)thio)-N-phenylbutanamide (3f).** The reaction was conducted according to general procedure A, the reaction mixture was stirred at 80 °C for 24 hours. The product was purified by preparative TLC (1:10 EA:PE) as yellow solid (25 mg, 76%).

<sup>1</sup>H NMR (400 MHz, CDCl<sub>3</sub>): δ 7.55 (s, 1H), 7.50-7.48 (m, 2H), 7.39-7.37 (m, 2H), 7.33-7.29 (m, 4H), 7.10 (t, *J* = 7.4 Hz, 1H), 3.74-3.66 (m, 1H), 2.68-2.63 (m, 1H), 2.48-2.42 (m, 1H), 1.39 (d, *J* = 6.8 Hz, 3H), 1.29 (s, 9H).

<sup>13</sup>C NMR (100 MHz, CDCl<sub>3</sub>): δ 169.09, 151.05, 137.78, 132.82, 130.01, 129.13, 126.28, 124.52, 120.01, 44.73, 40.36, 34.69, 31.35, 21.15.

HRMS (ESI): Calcd for C<sub>20</sub>H<sub>25</sub>NOS [M+H]<sup>+</sup>: 328.1735, Found: 328.1734.

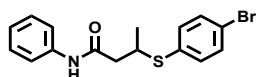

**3-((4-bromophenyl)thio)-N-phenylbutanamide (3g).** The reaction was conducted according to general procedure A, 4-bromobenzenethiol (2 equiv, 0.2 mmol, 38 mg), THF (0.1 mL) was added, the reaction mixture was stirred at 80 °C for 24 hours. The product was purified by preparative TLC (1:10 EA:PE) as yellow oil (27 mg, 77%).

<sup>1</sup>H NMR (400 MHz, CDCl<sub>3</sub>): δ 7.77 (s, 1H), 7.49-7.47 (m, 2H), 7.41-7.38 (m, 2H), 7.32-7.26 (m, 4H), 7.13-7.09 (m, 1H), 3.79-3.70 (m, 1H), 2.64 (dd, *J* = 14.8, 6.3 Hz, 1H), 2.46 (dd, *J* = 14.8, 7.6 Hz, 1H), 1.36 (d, *J* = 6.8 Hz, 3H).

<sup>13</sup>C NMR (100 MHz, CDCl<sub>3</sub>): δ 168.90, 137.65, 133.85, 133.29, 132.22, 129.11, 124.69, 121.62, 120.20, 44.68, 40.20, 21.11.

HRMS (ESI): Calcd for C<sub>16</sub>H<sub>16</sub>BrNOS [M+H]<sup>+</sup>: 350.0214, Found: 350.0212.

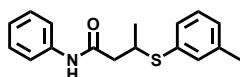

**N-phenyl-3-(m-tolylthio)butanamide (3h).** The reaction was conducted according to general procedure A, the reaction mixture was stirred at 80 °C for 24 hours. The product was purified by preparative TLC (1:10 EA:PE) as yellow solid (21 mg, 73%).

<sup>1</sup>H NMR (400 MHz, CDCl<sub>3</sub>): δ 7.89 (s, 1H), 7.51 (d, *J* = 7.7 Hz, 2H), 7.32-7.23 (m, 4H), 7.19 (t, *J* = 7.5 Hz, 1H), 7.13-7.05 (m, 2H), 3.81-3.72 (m, 1H), 2.70-2.64 (m, 1H), 2.50-2.44 (m, 1H), 2.31 (s, 3H), 1.38 (d, *J* = 6.7 Hz, 3H).



$^{13}\text{C}$  NMR (100 MHz,  $\text{CDCl}_3$ ):  $\delta$  169.19, 138.96, 137.76, 133.59, 133.05, 129.42, 129.06, 128.98, 128.39, 124.51, 120.12, 44.59, 40.05, 21.39, 21.08.

HRMS (ESI): Calcd for  $\text{C}_{17}\text{H}_{19}\text{NOS}$   $[\text{M}+\text{H}]^+$ : 286.1266, Found: 286.1268.

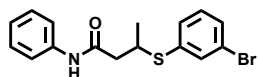

**3-((3-bromophenyl)thio)-N-phenylbutanamide (3i).** The reaction was conducted according to general procedure A, 3-bromobenzenethiol (2 equiv, 0.2 mmol, 38 mg), THF (0.1 mL) was added, the reaction mixture was stirred at 80 °C for 24 hours. The product was purified by preparative TLC (1:10 EA:PE) as yellow solid (30 mg, 86%).  $^1\text{H}$  NMR (400 MHz,  $\text{CDCl}_3$ ):  $\delta$  7.60 (s, 1H), 7.57 (t,  $J = 1.8$  Hz, 1H), 7.51-7.48 (m, 2H), 7.37-7.29 (m, 4H), 7.17-7.09 (m, 2H), 3.84-3.76 (m, 1H), 2.69-2.63 (m, 1H), 2.51-2.45 (m, 1H), 1.39 (d,  $J = 6.7$  Hz, 3H).

$^{13}\text{C}$  NMR (100 MHz,  $\text{CDCl}_3$ ):  $\delta$  168.73, 137.59, 136.57, 134.40, 130.50, 130.42, 129.14, 124.69, 122.85, 120.11, 44.66, 40.06, 21.11.

HRMS (ESI): Calcd for  $\text{C}_{16}\text{H}_{16}\text{BrNOS}$   $[\text{M}+\text{H}]^+$ : 350.0214, Found: 350.0210.

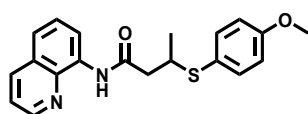

**3-((4-methoxyphenyl)thio)-N-(quinolin-8-yl)butanamide (3j).** The reaction was conducted according to general procedure A, alkene 2l (1 equiv, 0.1 mmol, 21.2 mg) was added, the reaction mixture was stirred at 80 °C for 24 hours. The product was purified by preparative TLC (1:20 EA:PE) as yellow oil (28 mg, 80%).

$^1\text{H}$  NMR (400 MHz,  $\text{CDCl}_3$ ):  $\delta$  9.87 (s, 1H), 8.81 (dd,  $J = 4.2, 1.7$  Hz, 1H), 8.75 (dd,  $J = 6.7, 2.3$  Hz, 1H), 8.16 (dd,  $J = 8.2, 1.7$  Hz, 1H), 7.55-7.44 (m, 5H), 6.85-6.82 (m, 2H), 3.78 (s, 3H), 3.74-3.65 (m, 1H), 2.83 (dd,  $J = 14.8, 6.2$  Hz, 1H), 2.62 (dd,  $J = 14.8, 7.8$  Hz, 1H), 1.40 (d,  $J = 6.8$  Hz, 3H).

$^{13}\text{C}$  NMR (100 MHz,  $\text{CDCl}_3$ ):  $\delta$  169.46, 159.80, 148.28, 138.39, 136.49, 136.28, 134.40, 128.01, 127.49, 123.90, 121.76, 121.72, 116.66, 114.60, 55.40, 45.39, 41.12, 21.13.

HRMS (ESI): Calcd for  $\text{C}_{20}\text{H}_{20}\text{N}_2\text{O}_2\text{S}$   $[\text{M}+\text{H}]^+$ : 353.1324, Found: 353.1327.

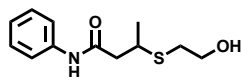

**3-((2-hydroxyethyl)thio)-*N*-phenylbutanamide (3k).** The reaction was conducted according to general procedure A, the reaction mixture was stirred at 80 °C for 24 hours. The product was purified by preparative TLC (1:10 MeOH:DCM) as yellow oil (17 mg, 71%).

<sup>1</sup>H NMR (400 MHz, CDCl<sub>3</sub>): δ 7.97 (s, 1H), 7.52 (d, *J* = 7.7 Hz, 2H), 7.31 (t, *J* = 7.9 Hz, 2H), 7.11 (t, *J* = 7.4 Hz, 1H), 3.81-3.76 (m, 2H), 3.43-3.35 (m, 1H), 3.04 (s, 1H), 2.76 (t, *J* = 5.7 Hz, 2H), 2.57 (d, *J* = 7.0 Hz, 2H), 1.37 (d, *J* = 6.8 Hz, 3H).

<sup>13</sup>C NMR (100 MHz, CDCl<sub>3</sub>): δ 169.54, 137.75, 129.13, 124.62, 120.15, 61.53, 45.35, 36.90, 34.10, 22.32.

HRMS (ESI): Calcd for C<sub>12</sub>H<sub>17</sub>NO<sub>2</sub>S[M+H]<sup>+</sup>: 240.1058, Found: 240.1061.

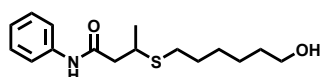

**3-((6-hydroxyhexyl)thio)-*N*-phenylbutanamide (3l).** The reaction was conducted according to general procedure A, the reaction mixture was stirred at 80 °C for 24 hours. The product was purified by preparative TLC (1:10 MeOH:DCM) as yellow oil (27 mg, 91%).

<sup>1</sup>H NMR (400 MHz, CDCl<sub>3</sub>): δ 7.94 (s, 1H), 7.52 (d, *J* = 7.8 Hz, 2H), 7.31 (t, *J* = 7.9 Hz, 2H), 7.10 (t, *J* = 7.7 Hz, 1H), 3.62 (t, *J* = 6.8 Hz, 2H), 3.31-3.26 (m, 1H), 2.63-2.49 (m, 4H), 1.64-1.52 (m, 5H), 1.42-1.33 (m, 6H).

<sup>13</sup>C NMR (100 MHz, CDCl<sub>3</sub>): δ 169.33, 137.90, 129.12, 124.49, 120.05, 62.89, 45.48, 37.13, 32.63, 31.08, 29.67, 28.67, 25.36, 21.99.

HRMS (ESI): Calcd for C<sub>16</sub>H<sub>25</sub>NO<sub>2</sub>S [M+H]<sup>+</sup>: 296.1684, Found: 296.1691.

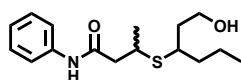

**3-((1-hydroxyhexan-3-yl)thio)-*N*-phenylbutanamide (3m).** The reaction was conducted according to general procedure A, the reaction mixture was stirred at 80 °C for 24 hours. The product was purified by preparative TLC (1:10 MeOH:DCM) as colorless oil (21 mg, 72%). The dr value is 1.1:1 analysis by GCMS.

<sup>1</sup>H NMR (400 MHz, CDCl<sub>3</sub>): δ 8.03 (d, *J* = 47.1 Hz, 1H), 7.53 (d, *J* = 8.0 Hz, 2H), 7.31 (t, *J* = 7.7 Hz, 2H), 7.10 (t, *J* = 7.5 Hz, 1H), 3.88-3.82 (m, 1H), 3.79-3.65 (m, 1H), 3.42-3.29 (m, 1H), 2.96-2.88 (m, 1H), 2.86-2.48 (m, 3H), 1.94-1.84 (m, 2H), 1.61-1.42 (m, 4H), 1.40-1.37 (m, 3H), 0.93-0.85 (m, 3H).

$^{13}\text{C}$  NMR (100 MHz,  $\text{CDCl}_3$ ):  $\delta$  169.65, 169.62, 137.93, 137.82, 129.12, 129.09, 124.55, 124.46, 120.05, 119.98, 60.52, 60.14, 45.90, 45.88, 43.55, 41.65, 39.11, 38.46, 38.04, 37.62, 37.51, 36.54, 22.86, 22.51, 20.13, 20.07, 14.18, 14.10.

HRMS (ESI): Calcd for  $\text{C}_{16}\text{H}_{25}\text{NO}_2\text{S}$   $[\text{M}+\text{H}]^+$ : 296.1684, Found: 296.1687.

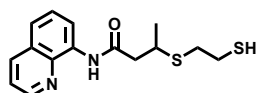

**3-((2-mercaptoethyl)thio)-N-(quinolin-8-yl)butanamide (3n).** The reaction was conducted according to general procedure A, the reaction mixture was stirred at 80 °C for 24 hours. The product was purified by preparative TLC (1:8 EA/PE) as yellow oil (21 mg, 70%).

$^1\text{H}$  NMR (400 MHz,  $\text{CDCl}_3$ ):  $\delta$  9.90 (s, 1H), 8.81 (dd,  $J = 4.2, 1.7$  Hz, 1H), 8.78 (dd,  $J = 6.8, 2.2$  Hz, 1H), 8.16 (dd,  $J = 8.2, 1.7$  Hz, 1H), 7.56-7.44 (m, 3H), 3.50-3.42 (m, 1H), 2.88-2.82 (m, 3H), 2.79-2.69 (m, 3H), 1.74 (t,  $J = 8.0$  Hz, 1H), 1.44 (d,  $J = 6.8$  Hz, 3H).

$^{13}\text{C}$  NMR (100 MHz,  $\text{CDCl}_3$ ):  $\delta$  169.28, 148.38, 138.46, 136.54, 134.39, 128.08, 127.53, 121.88, 121.81, 116.74, 46.34, 37.08, 35.36, 25.07, 22.12.

HRMS (ESI): Calcd for  $\text{C}_{15}\text{H}_{18}\text{N}_2\text{OS}_2$   $[\text{M}+\text{H}]^+$ : 307.0939, Found: 307.0937.

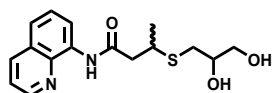

**3-((2,3-dihydroxypropyl)thio)-N-(quinolin-8-yl)butanamide (3o).** The reaction was conducted according to general procedure A, the reaction mixture was stirred at 80 °C for 24 hours. The product was purified by preparative TLC (1:10 MeOH:DCM) as yellow oil (19 mg, 60%). The dr value is 1:1 analysis by GCMS.

$^1\text{H}$  NMR (400 MHz,  $\text{CDCl}_3$ ):  $\delta$  9.98 (s, 1H), 8.81-8.76 (m, 2H), 8.18-8.15 (m, 1H), 7.54-7.44 (m, 3H), 3.95-3.88 (m, 1H), 3.75-3.71 (m, 1H), 3.62-3.57 (m, 1H), 3.56-3.44 (m, 1H), 2.86-2.78 (m, 3H), 2.75-2.63 (m, 1H), 1.45 (d,  $J = 6.8$  Hz, 3H).

$^{13}\text{C}$  NMR (100 MHz,  $\text{CDCl}_3$ ):  $\delta$  169.80, 169.73, 148.46, 148.44, 138.44, 136.75, 136.72, 134.24, 134.22, 128.16, 128.16, 127.55, 122.10, 122.08, 121.80, 117.18, 117.12, 71.87, 70.31, 65.59, 65.52, 45.73, 45.64, 37.69, 36.91, 34.83, 34.30, 22.49, 22.20.

HRMS (ESI): Calcd for  $\text{C}_{16}\text{H}_{20}\text{N}_2\text{O}_3\text{S}$   $[\text{M}+\text{H}]^+$ : 321.1273, Found: 321.1271.

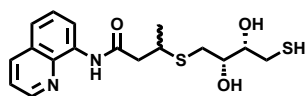

**3-(((2S,3S)-2,3-Dihydroxy-4-mercaptobutyl)thio)-N-(quinolin-8-yl)butanamide**

**(3p).** The reaction was conducted according to general procedure A, (2R,3S)-3,4-dimercaptobutane-1,2-diol (2 equiv, 0.2 mmol, 30 mg) was added, neat condition, the reaction mixture was stirred at 80 °C for 24 hours. The product was purified by preparative TLC (1:10 MeOH:DCM) as yellow oil (22 mg, 61%). The dr value is 1:1 analysis by GCMS.

<sup>1</sup>H NMR (400 MHz, CDCl<sub>3</sub>): δ 9.94 (d, *J* = 4.5 Hz, 1H), 8.79-8.73 (m, 2H), 8.14-8.11 (m, 1H), 7.54-7.41 (m, 3H), 3.93-3.83 (m, 2H), 3.53-3.44 (m, 1H), 3.02-2.95 (m, 1H), 2.93-2.90 (m, 1H), 2.88-2.81 (m, 2H), 2.79-2.70 (m, 2H), 1.44-1.41 (m, 3H).

<sup>13</sup>C NMR (100 MHz, CDCl<sub>3</sub>): δ 169.80, 169.73, 148.44, 138.36, 136.68, 136.64, 134.12, 128.09, 127.48, 122.08, 121.76, 117.12, 117.08, 74.08, 72.05, 70.73, 45.65, 37.69, 36.96, 35.23, 34.79, 28.59, 22.40, 22.16.

HRMS (ESI): Calcd for C<sub>17</sub>H<sub>22</sub>N<sub>2</sub>O<sub>3</sub>S<sub>2</sub> [M+H]<sup>+</sup>: 367.1150, Found: 367.1150.

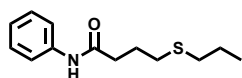

**N-phenyl-4-(propylthio)butanamide (4a).** The reaction was conducted according to general procedure B, the reaction mixture was stirred at 80 °C for 6 hours. The product was purified by preparative TLC (1:10 EA:PE) as yellow solid (21 mg, 90%).

<sup>1</sup>H NMR (400 MHz, CDCl<sub>3</sub>): δ 7.88 (s, 1H), 7.51 (d, *J* = 7.8 Hz, 2H), 7.28 (t, *J* = 8.0 Hz, 2H), 7.08 (t, *J* = 7.4 Hz, 1H), 2.56 (t, *J* = 7.0 Hz, 2H), 2.49-2.44 (m, 4H), 2.02-1.95 (m, 2H), 1.62-1.53 (m, 2H), 0.96 (t, *J* = 7.3 Hz, 3H).

<sup>13</sup>C NMR (100 MHz, CDCl<sub>3</sub>): δ 171.10, 137.97, 128.98, 124.29, 120.00, 36.02, 33.90, 31.27, 25.01, 22.93, 13.57.

HRMS (ESI): Calcd for C<sub>13</sub>H<sub>19</sub>NOS [M+H]<sup>+</sup>: 238.1266, Found: 238.1273.

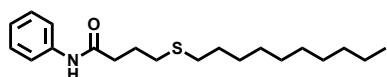

**4-(decylthio)-N-phenylbutanamide (4b).** The reaction was conducted according to general procedure B, the reaction mixture was stirred at 80 °C for 24 hours. The product was purified by preparative TLC (1:10 EA:PE) as yellow solid (21 mg, 64%).

$^1\text{H}$  NMR (400 MHz,  $\text{CDCl}_3$ ):  $\delta$  7.51 (d,  $J = 7.7$  Hz, 3H), 7.30 (d,  $J = 8.3$  Hz, 2H), 7.09 (t,  $J = 7.4$  Hz, 1H), 2.60 (t,  $J = 6.9$  Hz, 2H), 2.52-2.47 (m, 4H), 2.05-1.98 (m, 2H), 1.58-1.53 (m, 2H), 1.49-1.31 (m, 2H), 1.29-1.25 (m, 12H), 0.87 (t,  $J = 6.8$  Hz, 3H).

$^{13}\text{C}$  NMR (100 MHz,  $\text{CDCl}_3$ ):  $\delta$  170.73, 137.93, 129.16, 124.39, 119.82, 36.11, 32.03, 32.00, 31.40, 29.75, 29.71, 29.68, 29.46, 29.39, 29.08, 24.88, 22.83, 14.28.

HRMS (ESI): Calcd for  $\text{C}_{20}\text{H}_{33}\text{NOS}$   $[\text{M}+\text{H}]^+$ : 336.2361, Found: 336.2364.

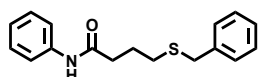

**4-(benzylthio)-*N*-phenylbutanamide (4c).** The reaction was conducted according to general procedure B, the reaction mixture was stirred at 80 °C for 24 hours. The product was purified by preparative TLC (1:10 EA:PE) as white solid (24 mg, 83%).

$^1\text{H}$  NMR (400 MHz,  $\text{CDCl}_3$ ):  $\delta$  7.48 (d,  $J = 7.3$  Hz, 2H), 7.39 (s, 1H), 7.33-7.29 (m, 6H), 7.24-7.21 (m, 1H), 7.12-7.08 (m, 1H), 3.71 (s, 2H), 2.51 (t,  $J = 6.9$  Hz, 2H), 2.43 (t,  $J = 7.2$  Hz, 2H), 2.01-1.94 (m, 2H).

$^{13}\text{C}$  NMR (100 MHz,  $\text{CDCl}_3$ ):  $\delta$  170.76, 138.39, 137.89, 129.09, 128.95, 128.63, 127.13, 124.38, 119.92, 36.06, 30.70, 24.53.

HRMS (ESI): Calcd for  $\text{C}_{17}\text{H}_{19}\text{NOS}$   $[\text{M}+\text{H}]^+$ : 286.1266, Found: 286.1270.

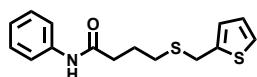

***N*-phenyl-4-((thiophen-2-ylmethyl)thio)butanamide (4d).** The reaction was conducted according to general procedure B, the reaction mixture was stirred at 80 °C for 24 hours. The product was purified by preparative TLC (1:10 EA:PE) as yellow solid (26 mg, 89%).

$^1\text{H}$  NMR (400 MHz,  $\text{CDCl}_3$ ):  $\delta$  7.48 (d,  $J = 7.7$  Hz, 2H), 7.33-7.25 (m, 3H), 7.17 (dd,  $J = 5.1, 1.3$  Hz, 1H), 7.09 (t,  $J = 7.4$  Hz, 1H), 6.91-6.87 (m, 2H), 3.92 (s, 2H), 2.58 (t,  $J = 6.9$  Hz, 2H), 2.44 (t,  $J = 7.2$  Hz, 2H), 2.02-1.95 (m, 2H).

$^{13}\text{C}$  NMR (100 MHz,  $\text{CDCl}_3$ ):  $\delta$  170.66, 141.97, 137.88, 129.11, 126.82, 126.31, 125.07, 124.40, 119.92, 36.05, 30.93, 30.41, 24.44.

HRMS (ESI): Calcd for  $\text{C}_{15}\text{H}_{17}\text{NOS}_2$   $[\text{M}+\text{H}]^+$ : 292.0830, Found: 292.0829.

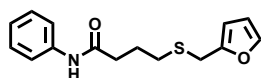

**4-((furan-2-ylmethyl)thio)-*N*-phenylbutanamide (4e).** The reaction was conducted according to general procedure B, the reaction mixture was stirred at 80 °C for 24 hours.

The product was purified by preparative TLC (1:10 EA:PE) as yellow oil (18 mg, 64%).

$^1\text{H}$  NMR (400 MHz,  $\text{CDCl}_3$ ):  $\delta$  7.50 (d,  $J = 7.7$  Hz, 2H), 7.33-7.29 (m, 4H), 7.10 (t,  $J = 7.4$  Hz, 1H), 6.29-6.28 (m, 1H), 6.18 (d,  $J = 3.2$  Hz, 1H), 3.72 (s, 2H), 2.60 (t,  $J = 6.9$  Hz, 2H), 2.46 (t,  $J = 7.2$  Hz, 2H), 2.03-1.96 (m, 2H).

$^{13}\text{C}$  NMR (100 MHz,  $\text{CDCl}_3$ ):  $\delta$  170.66, 151.50, 142.29, 137.89, 129.12, 124.41, 119.88, 110.56, 107.74, 36.01, 31.10, 28.14, 24.50.

HRMS (ESI): Calcd for  $\text{C}_{15}\text{H}_{17}\text{NO}_2\text{S}$   $[\text{M}+\text{H}]^+$ : 276.1058, Found: 276.1059.

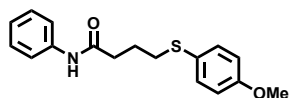

**4-((4-methoxyphenyl)thio)-*N*-phenylbutanamide (4f).** The reaction was conducted according to general procedure B, the reaction mixture was stirred at 80 °C for 24 hours. The product was purified by preparative TLC (1:10 EA:PE) as yellow solid (16 mg, 54%).

$^1\text{H}$  NMR (400 MHz,  $\text{CDCl}_3$ ):  $\delta$  7.48 (d,  $J = 8.0$  Hz, 2H), 7.38-7.35 (m, 2H), 7.33-7.29 (m, 2H), 7.14 (s, 1H), 7.10 (t,  $J = 7.5$  Hz, 1H), 6.86-6.82 (m, 2H), 3.78 (s, 3H), 2.92 (t,  $J = 6.8$  Hz, 2H), 2.51 (t,  $J = 7.2$  Hz, 2H), 2.04-1.97 (m, 2H).

$^{13}\text{C}$  NMR (100 MHz,  $\text{CDCl}_3$ ):  $\delta$  133.54, 129.15, 124.43, 119.82, 114.79, 55.47, 35.81, 35.22, 24.88.

HRMS (ESI): Calcd for  $\text{C}_{17}\text{H}_{19}\text{NO}_2\text{S}$   $[\text{M}+\text{H}]^+$ : 302.1215, Found: 302.1213.

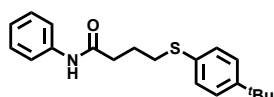

**4-((4-(tert-butyl)phenyl)thio)-*N*-phenylbutanamide (4g).** The reaction was conducted according to general procedure B, the reaction mixture was stirred at 80 °C for 24 hours. The product was purified by preparative TLC (1:10 EA:PE) as yellow oil (30 mg, 93%).

$^1\text{H}$  NMR (400 MHz,  $\text{CDCl}_3$ ):  $\delta$  7.50-7.48 (m, 2H), 7.35 (s, 1H), 7.33-7.28 (m, 6H), 7.10 (t,  $J = 7.4$  Hz, 1H), 2.99 (t,  $J = 6.9$  Hz, 2H), 2.52 (t,  $J = 7.2$  Hz, 2H), 2.09-2.02 (m, 2H), 1.30 (s, 9H).

$^{13}\text{C}$  NMR (100 MHz,  $\text{CDCl}_3$ ):  $\delta$  170.63, 149.64, 137.85, 132.17, 129.75, 129.11, 126.20, 124.41, 119.91, 35.85, 34.58, 33.46, 31.38, 24.78.

HRMS (ESI): Calcd for  $\text{C}_{20}\text{H}_{25}\text{NOS}$   $[\text{M}+\text{H}]^+$ : 328.1735, Found: 328.1739.

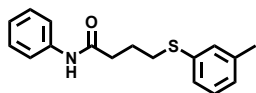

**3-(benzyl(methyl)amino)-N-(quinolin-8-yl)butanamide (4h).** The reaction was conducted according to general procedure B, the reaction mixture was stirred at 80 °C for 24 hours. The product was purified by preparative TLC (1:10 EA:PE) as yellow solid (21 mg, 75%).

<sup>1</sup>H NMR (400 MHz, CDCl<sub>3</sub>): δ 7.48 (d, *J* = 7.8 Hz, 2H), 7.34 (s, 1H), 7.31 (t, *J* = 7.9 Hz, 2H), 7.19-7.14 (m, 3H), 7.10 (t, *J* = 7.4 Hz, 1H), 6.99 (d, *J* = 6.8 Hz, 1H), 3.01 (t, *J* = 6.8 Hz, 2H), 2.51 (t, *J* = 7.1 Hz, 2H), 2.31 (s, 3H), 2.10-2.03 (m, 2H).

<sup>13</sup>C NMR (100 MHz, CDCl<sub>3</sub>): δ 170.57, 138.94, 137.85, 135.65, 130.06, 129.10, 128.95, 127.16, 126.39, 124.41, 119.89, 35.83, 32.99, 24.73, 21.47.

HRMS (ESI): Calcd for C<sub>17</sub>H<sub>19</sub>NOS [M+H]<sup>+</sup>: 286.1266, Found: 286.1266.

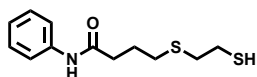

**4-((2-mercaptoethyl)thio)-N-phenylbutanamide (4i).** The reaction was conducted according to general procedure B, NaOAc (10 mol%, 0.01 mmol, 0.8 mg) was added, the reaction mixture was stirred at 80 °C for 24 hours. The product was purified by preparative TLC (1:5 EA:PE) as white solid (23 mg, 92%).

<sup>1</sup>H NMR (400 MHz, CDCl<sub>3</sub>): δ 7.51 (d, *J* = 7.8 Hz, 2H), 7.34-7.30 (m, 3H), 7.11 (t, *J* = 7.4 Hz, 1H), 2.88-2.69 (m, 4H), 2.64 (t, *J* = 6.9 Hz, 2H), 2.50 (t, *J* = 7.1 Hz, 2H), 2.06-1.99 (m, 2H), 1.73 (t, *J* = 7.8 Hz, 1H).

<sup>13</sup>C NMR (100 MHz, CDCl<sub>3</sub>): δ 170.52, 137.85, 129.17, 124.48, 119.87, 35.92, 31.25, 24.93, 24.79.

HRMS (ESI): Calcd for C<sub>12</sub>H<sub>17</sub>NOS<sub>2</sub> [M+H]<sup>+</sup>: 256.0830, Found: 256.0830.

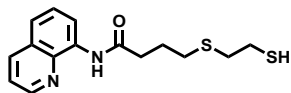

**4-((2-mercaptoethyl)thio)-N-(quinolin-8-yl)butanamide (4j).** The reaction was conducted according to general procedure A, NaOAc (10 mol%, 0.01 mmol, 0.8 mg) was added, the reaction mixture was stirred at 80 °C for 24 hours. The product was purified by preparative TLC (1:8 EA/PE) as yellow oil (29 mg, 95%).

<sup>1</sup>H NMR (400 MHz, CDCl<sub>3</sub>): δ 9.82 (s, 1H), 8.79 (dd, *J* = 4.2, 1.7 Hz, 1H), 8.75 (dd, *J* = 7.2, 1.9 Hz, 1H), 8.15 (dd, *J* = 8.4, 1.8 Hz, 1H), 7.54-7.43 (m, 3H), 2.80-2.73 (m, 3H), 2.72-2.66 (m, 5H), 2.13-2.06 (m, 2H), 1.72 (t, *J* = 7.7 Hz, 1H).

$^{13}\text{C}$  NMR (100 MHz,  $\text{CDCl}_3$ ):  $\delta$  170.87, 148.26, 138.35, 136.48, 134.46, 128.01, 127.48, 121.73, 121.61, 116.51, 36.53, 36.04, 31.40, 25.24, 24.81.

HRMS (ESI): Calcd for  $\text{C}_{15}\text{H}_{18}\text{N}_2\text{OS}_2$   $[\text{M}+\text{H}]^+$ : 307.0939, Found: 307.0941.

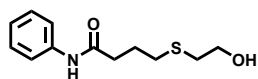

**4-((2-hydroxyethyl)thio)-N-phenylbutanamide (4k).** The reaction was conducted according to general procedure B, NaOAc (10 mol%, 0.8 mg, 0.01 mmol) was added, the reaction mixture was stirred at 80 °C for 24 hours. The product was purified by preparative TLC (1:1 EA:PE) as yellow solid (20 mg, 84%).

$^1\text{H}$  NMR (400 MHz,  $\text{CDCl}_3$ ):  $\delta$  7.73 (s, 1H), 7.50 (d,  $J = 1.1$  Hz, 2H), 7.30 (t,  $J = 7.9$  Hz, 2H), 7.09 (t,  $J = 7.4$  Hz, 1H), 3.74-3.71 (m, 2H), 2.71 (t,  $J = 5.9$  Hz, 2H), 2.61 (t,  $J = 6.9$  Hz, 2H), 2.49 (t,  $J = 7.1$  Hz, 2H), 2.04-1.97 (m, 2H).

$^{13}\text{C}$  NMR (100 MHz,  $\text{CDCl}_3$ ):  $\delta$  170.94, 137.90, 129.11, 124.45, 119.98, 60.54, 35.87, 35.03, 31.04, 25.04.

HRMS (ESI): Calcd for  $\text{C}_{12}\text{H}_{17}\text{NO}_2\text{S}$   $[\text{M}+\text{H}]^+$ : 240.1058, Found: 240.1062.

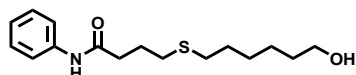

**4-((6-hydroxyhexyl)thio)-N-phenylbutanamide (4l).** The reaction was conducted according to general procedure B, NaOAc (10 mol%, 0.8 mg, 0.01 mmol) was added, the reaction mixture was stirred at 80 °C for 24 hours. The product was purified by preparative TLC (1:2 EA:PE) as white solid (27 mg, 90%).

$^1\text{H}$  NMR (400 MHz,  $\text{CDCl}_3$ ):  $\delta$  7.69 (s, 1H), 7.51 (d,  $J = 7.6$  Hz, 2H), 7.30 (t,  $J = 7.9$  Hz, 2H), 7.09 (t,  $J = 7.4$  Hz, 1H), 3.63 (t,  $J = 6.5$  Hz, 2H), 2.59 (t,  $J = 6.9$  Hz, 2H), 2.52-2.46 (m, 4H), 2.04-1.96 (m, 2H), 1.76 (s, 1H), 1.62-1.52 (m, 4H), 1.42-1.33 (m, 4H).

$^{13}\text{C}$  NMR (100 MHz,  $\text{CDCl}_3$ ):  $\delta$  170.96, 138.01, 129.09, 124.34, 119.89, 62.87, 36.03, 32.60, 31.77, 31.37, 29.48, 28.57, 25.35, 24.93.

HRMS (ESI): Calcd for  $\text{C}_{16}\text{H}_{25}\text{NO}_2\text{S}$   $[\text{M}+\text{H}]^+$ : 296.1684, Found: 296.1685.

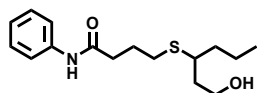

**4-((1-hydroxyhexan-3-yl)thio)-N-phenylbutanamide (4m).** The reaction was conducted according to general procedure B, NaOAc (10 mol%, 0.8 mg, 0.01 mmol) was added, the reaction mixture was stirred at 80 °C for 24 hours. The product was purified by preparative TLC (1:10 EA:PE) as yellow oil (24 mg, 82%).



<sup>1</sup>H NMR (400 MHz, CDCl<sub>3</sub>): δ 7.92 (s, 1H), 7.53-7.51 (m, 2H), 7.30 (t, *J* = 7.6 Hz, 2H), 7.09 (t, *J* = 7.4 Hz, 1H), 3.90-3.89 (m, 1H), 3.79-3.74 (m, 1H), 2.82-2.76 (m, 2H), 2.60 (t, *J* = 7.0 Hz, 2H), 2.57-2.51 (m, 1H), 2.48-2.40 (m, 1H), 2.07-1.97 (m, 2H), 1.90-1.82 (m, 1H), 1.70-1.62 (m, 1H), 1.57-1.48 (m, 2H), 1.47-1.37 (m, 2H), 0.89 (t, *J* = 7.2 Hz, 3H).

<sup>13</sup>C NMR (100 MHz, CDCl<sub>3</sub>): δ 171.25, 138.05, 129.08, 124.35, 119.91, 119.88, 60.91, 42.87, 38.19, 37.04, 36.03, 29.74, 25.32, 20.12, 14.11.

HRMS (ESI): Calcd for C<sub>16</sub>H<sub>25</sub>NO<sub>2</sub>S [M+H]<sup>+</sup>: 296.1684, Found: 296.1688.

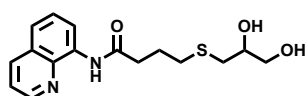

**4-((2,3-dihydroxypropyl)thio)-N-(quinolin-8-yl)butanamide (4n).** The reaction was conducted according to general procedure B, NaOAc (10 mol%, 0.8 mg, 0.01 mmol) was added, the reaction mixture was stirred at 80 °C for 24 hours. The product was purified by preparative TLC (1:10 MeOH:DCM) as yellow oil (26 mg, 80%).

<sup>1</sup>H NMR (400 MHz, CDCl<sub>3</sub>): δ 9.83 (s, 1H), 8.79 (dd, *J* = 4.3, 1.7 Hz, 1H), 8.73 (dd, *J* = 7.1, 1.9 Hz, 1H), 8.15 (dd, *J* = 8.3, 1.8 Hz, 1H), 7.55-7.43 (m, 3H), 3.86-3.81 (m, 1H), 3.76-3.72 (m, 1H), 3.59-3.55 (m, 1H), 2.77-2.61 (m, 6H), 2.16-2.05 (m, 2H).

<sup>13</sup>C NMR (100 MHz, CDCl<sub>3</sub>): δ 171.22, 148.36, 138.39, 136.58, 134.37, 128.08, 127.51, 121.80, 121.77, 116.73, 70.36, 65.45, 36.52, 35.61, 31.87, 25.21.

HRMS (ESI): Calcd for C<sub>16</sub>H<sub>20</sub>N<sub>2</sub>O<sub>3</sub>S [M+H]<sup>+</sup>: 321.1273, Found: 321.1275.

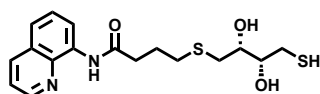

**4-(((2R,3R)-2,3-dihydroxy-4-mercaptobutyl)thio)-N-(quinolin-8-yl)butanamide (4o).** The reaction was conducted according to general procedure B, (2R,3S)-3,4-dimercaptobutane-1,2-diol (2 equiv, 0.2 mmol, 30 mg) and NaOAc (10 mol%, 0.01 mmol, 0.8 mg) was added, neat condition, the reaction mixture was stirred at 80 °C for 24 hours. The product was purified by preparative TLC (1:20 MeOH:DCM) as yellow oil (30 mg, 81%).

<sup>1</sup>H NMR (400 MHz, CDCl<sub>3</sub>): δ 9.83 (s, 1H), 8.78 (dd, *J* = 4.3, 1.7 Hz, 1H), 8.71 (dd, *J* = 7.3, 1.8 Hz, 1H), 8.12 (dd, *J* = 8.3, 1.6 Hz, 1H), 7.53-7.41 (m, 3H), 3.96-3.92 (m,

1H), 3.81-3.77 (m, 1H), 3.54 (s, 1H), 3.42 (s, 1H), 3.02-2.88 (m, 2H), 2.85-2.71 (m, 2H), 2.68 (t,  $J = 7.2$  Hz, 4H), 2.15-2.03 (m, 2H).

$^{13}\text{C}$  NMR (100 MHz,  $\text{CDCl}_3$ ):  $\delta$  171.38, 148.39, 138.38, 136.57, 134.33, 128.07, 127.50, 121.86, 121.78, 116.81, 71.20, 71.15, 71.02, 43.08, 42.90, 36.59, 36.57, 35.93, 35.91, 31.86, 25.25, 25.23.

HRMS (ESI): Calcd for  $\text{C}_{17}\text{H}_{22}\text{N}_2\text{O}_3\text{S}_2$   $[\text{M}+\text{H}]^+$ : 367.1150, Found: 367.1154.

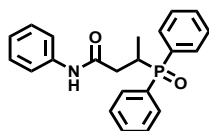

**3-(diphenylphosphoryl)-*N*-phenylbutanamide (6a).** The reaction was conducted according to general procedure C, the reaction mixture was stirred at 100 °C for 24 hours. The product was purified by preparative TLC (1:20 MeOH:DCM) as white solid (29 mg, 79%).

$^1\text{H}$  NMR (400 MHz,  $\text{CDCl}_3$ ):  $\delta$  10.82 (s, 1H), 7.85-7.78 (m, 6H), 7.53-7.43 (m, 6H), 7.31-7.26 (m, 2H), 7.08-7.05 (m, 1H), 3.29-3.23 (m, 1H), 2.94-2.86 (m, 1H), 2.72-2.65 (m, 1H), 1.22 (dd,  $J = 16.4, 6.9$  Hz, 3H).

$^{13}\text{C}$  NMR (100 MHz,  $\text{CDCl}_3$ ):  $\delta$  169.71 (d,  $J_{\text{c-p}} = 16$  Hz), 139.45, 132.10 (d,  $J_{\text{c-p}} = 2.9$  Hz), 132.06 (d,  $J_{\text{c-p}} = 21.6$  Hz), 132.01 (d,  $J_{\text{c-p}} = 2.8$  Hz), 131.10 (d,  $J_{\text{c-p}} = 20.2$  Hz), 130.91, 130.88, 130.82, 130.79, 129.16 (d,  $J_{\text{c-p}} = 11.3$  Hz), 128.99 (d,  $J_{\text{c-p}} = 11.5$  Hz), 128.88, 123.66, 119.81, 36.79, 29.04 (d,  $J_{\text{c-p}} = 74.0$  Hz), 12.58 (d,  $J_{\text{c-p}} = 2.9$  Hz).

$^{31}\text{P}$  NMR (162 MHz,  $\text{CDCl}_3$ ):  $\delta$  39.25.

HRMS (ESI): Calcd for  $\text{C}_{22}\text{H}_{22}\text{NO}_2\text{P}$   $[\text{M}+\text{H}]^+$ : 364.1466, Found: 364.1468.

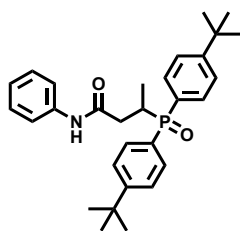

**3-(bis(4-(tert-butyl)phenyl)phosphoryl)-*N*-phenylbutanamide (6b).** The reaction was conducted according to general procedure C, the reaction mixture was stirred at 100 °C for 24 hours. The product was purified by preparative TLC (1:20 MeOH:DCM) as yellow solid (42 mg, 88%).

$^1\text{H}$  NMR (400 MHz,  $\text{CDCl}_3$ ):  $\delta$  10.99 (s, 1H), 7.82-7.75 (m, 6H), 7.50-7.44 (m, 4H), 7.28 (t,  $J = 7.9$  Hz, 2H), 7.05 (t,  $J = 7.4$  Hz, 1H), 3.26-3.20 (m, 1H), 2.96-2.88 (m, 1H), 2.74-2.67 (m, 1H), 1.31 (s, 9H), 1.26 (s, 9H), 1.23-1.19 (m, 3H).

$^{13}\text{C}$  NMR (100 MHz,  $\text{CDCl}_3$ ):  $\delta$  170.07 (d,  $J_{\text{c-p}} = 16.1$  Hz), 155.35 (t,  $J_{\text{c-p}} = 3.0$  Hz), 139.60, 130.76 (d,  $J_{\text{c-p}} = 2.2$  Hz), 130.67 (d,  $J_{\text{c-p}} = 2.2$  Hz), 128.96, 128.82, 127.90 (d,  $J_{\text{c-p}} = 13.5$  Hz), 126.11 (d,  $J_{\text{c-p}} = 11.6$  Hz), 125.94 (d,  $J_{\text{c-p}} = 11.6$  Hz), 123.49, 119.76, 36.82, 35.08 (d,  $J_{\text{c-p}} = 0.6$  Hz), 35.03 (d,  $J_{\text{c-p}} = 0.6$  Hz), 31.20, 31.13, 29.37 (d,  $J_{\text{c-p}} = 74.3$  Hz), 12.63 (d,  $J_{\text{c-p}} = 2.7$  Hz).

$^{31}\text{P}$  NMR (162 MHz,  $\text{CDCl}_3$ ):  $\delta$  39.32.

HRMS (ESI): Calcd for  $\text{C}_{30}\text{H}_{38}\text{NO}_2\text{P}$   $[\text{M}+\text{H}]^+$ : 476.2718, Found: 476.2719.

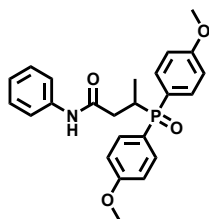

**3-(bis(4-methoxyphenyl)phosphoryl)-*N*-phenylbutanamide (6c).** The reaction was conducted according to general procedure C, the reaction mixture was stirred at 100 °C for 24 hours. The product was purified by preparative TLC (1:20 MeOH:DCM) as yellow solid (40 mg, 95%).

$^1\text{H}$  NMR (400 MHz,  $\text{CDCl}_3$ ):  $\delta$  10.88 (s, 1H), 7.77 (d,  $J = 8.3$  Hz, 2H), 7.75-7.69 (m, 4H), 7.28 (t,  $J = 7.4$  Hz, 2H), 7.05 (t,  $J = 7.4$  Hz, 1H), 6.98 (dd,  $J = 8.6, 1.7$  Hz, 2H), 6.91 (dd,  $J = 8.6, 1.7$  Hz, 2H), 3.83 (s, 3H), 3.77 (s, 3H), 3.17-3.12 (m, 1H), 2.89-2.81 (m, 1H), 2.72-2.65 (m, 1H), 1.20 (dd,  $J = 16.2, 7.0$  Hz, 3H).

$^{13}\text{C}$  NMR (100 MHz,  $\text{CDCl}_3$ ):  $\delta$  169.96 (d,  $J_{\text{c-p}} = 15.6$  Hz), 162.43 (d,  $J_{\text{c-p}} = 2.6$  Hz), 139.52, 132.68 (d,  $J_{\text{c-p}} = 3.7$  Hz), 132.58 (d,  $J_{\text{c-p}} = 3.7$  Hz), 128.83, 123.54, 119.77, 114.58 (d,  $J_{\text{c-p}} = 2.5$  Hz), 114.58 (d,  $J_{\text{c-p}} = 27.1$  Hz), 55.46, 55.40, 36.95, 29.37 (d,  $J_{\text{c-p}} = 75.2$  Hz), 12.72 (d,  $J_{\text{c-p}} = 2.5$  Hz)

$^{31}\text{P}$  NMR (162 MHz,  $\text{CDCl}_3$ ):  $\delta$  39.44.

HRMS (ESI): Calcd for  $\text{C}_{24}\text{H}_{26}\text{NO}_4\text{P}$   $[\text{M}+\text{H}]^+$ : 424.1678, Found: 424.1684.

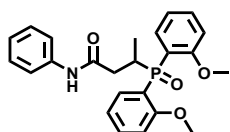

**3-(bis(2-methoxyphenyl)phosphoryl)-*N*-phenylbutanamide (6d).** The reaction was conducted according to general procedure C, the reaction mixture was stirred at 100 °C for 24 hours. The product was purified by preparative TLC (1:20 MeOH:DCM) as yellow solid (38 mg, 91%).

<sup>1</sup>H NMR (400 MHz, CDCl<sub>3</sub>): δ 10.84 (s, 1H), 7.94-7.88 (m, 1H), 7.85 (d, *J* = 7.7 Hz, 2H), 7.82-7.76 (m, 1H), 7.45 (t, *J* = 7.8 Hz, 1H), 7.38 (t, *J* = 7.8 Hz, 1H), 7.29 (t, *J* = 7.9 Hz, 2H), 7.07-7.01 (m, 2H), 6.98-6.94 (m, 1H), 6.84-6.79 (m, 2H), 3.65 (s, 3H), 3.64 (s, 3H), 3.62-3.57 (m, 1H), 2.83-2.79 (m, 2H), 1.18 (dd, *J* = 17.7, 7.1 Hz, 3H).

<sup>13</sup>C NMR (100 MHz, CDCl<sub>3</sub>): δ 170.63 (d, *J*<sub>c-p</sub> = 15.4 Hz), 160.74 (d, *J*<sub>c-p</sub> = 3.3 Hz), 160.28 (d, *J*<sub>c-p</sub> = 4.0 Hz), 139.71, 134.23 (d, *J*<sub>c-p</sub> = 5.9 Hz), 133.80 (d, *J*<sub>c-p</sub> = 6.7 Hz), 133.53 (d, *J*<sub>c-p</sub> = 2.0 Hz), 133.46 (d, *J*<sub>c-p</sub> = 2.0 Hz), 128.70, 123.37, 121.03 (d, *J*<sub>c-p</sub> = 5.2 Hz), 120.80 (d, *J*<sub>c-p</sub> = 5.4 Hz), 120.69 (d, *J*<sub>c-p</sub> = 5.3 Hz), 120.03, 111.24 (d, *J*<sub>c-p</sub> = 6.5 Hz), 110.95 (d, *J*<sub>c-p</sub> = 6.7 Hz), 55.49, 55.43, 38.00, 28.64 (d, *J*<sub>c-p</sub> = 77.1 Hz), 13.47 (d, *J*<sub>c-p</sub> = 2.4 Hz).

<sup>31</sup>P NMR (162 MHz, CDCl<sub>3</sub>): δ 39.61.

HRMS (ESI): Calcd for C<sub>24</sub>H<sub>26</sub>NO<sub>4</sub>P [M+H]<sup>+</sup>:424.1678, Found: 424.1679.

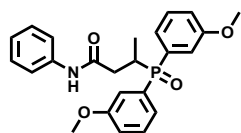

**3-(bis(3-methoxyphenyl)phosphanyl)-*N*-phenylbutanamide (6e).** The reaction was conducted according to general procedure C, the reaction mixture was stirred at 100 °C for 24 hours. The product was purified by preparative TLC (1:20 MeOH:DCM) as yellow solid (36 mg, 85%).

<sup>1</sup>H NMR (400 MHz, CDCl<sub>3</sub>): δ 10.66 (s, 1H), 7.77 (d, *J* = 8.3 Hz, 2H), 7.41-7.34 (m, 5H), 7.32-7.25 (m, 3H), 7.05 (t, *J* = 7.1 Hz, 2H), 6.97 (d, *J* = 7.3 Hz, 1H), 3.76 (s, 3H), 3.63 (s, 3H), 3.26-3.17 (m, 1H), 2.90-2.82 (m, 1H), 2.72-2.65 (m, 1H), 1.25-1.20 (m, 3H).

<sup>13</sup>C NMR (100 MHz, CDCl<sub>3</sub>): δ 169.67 (d, *J*<sub>c-p</sub> = 16.5 Hz), 160.01 (d, *J*<sub>c-p</sub> = 3.4 Hz), 159.87 (d, *J*<sub>c-p</sub> = 3.4 Hz), 139.46, 133.33 (d, *J*<sub>c-p</sub> = 25.0 Hz), 132.37 (d, *J*<sub>c-p</sub> = 23.7 Hz), 130.42 (d, *J*<sub>c-p</sub> = 13.5 Hz), 130.26 (d, *J*<sub>c-p</sub> = 13.6 Hz), 128.88, 123.66, 130.26 (d, *J*<sub>c-p</sub> = 13.6 Hz), 119.72, 118.39 (d, *J*<sub>c-p</sub> = 2.5 Hz), 118.34 (d, *J*<sub>c-p</sub> = 2.8 Hz), 115.51 (d, *J*<sub>c-p</sub> = 4.4 Hz), 115.42 (d, *J*<sub>c-p</sub> = 4.6 Hz), 55.43, 55.25, 36.78, 28.96 (d, *J*<sub>c-p</sub> = 74.5 Hz), 12.57 (d, *J*<sub>c-p</sub> = 2.9 Hz).

$^{31}\text{P}$  NMR (162 MHz,  $\text{CDCl}_3$ ):  $\delta$  39.68.

HRMS (ESI): Calcd for  $\text{C}_{24}\text{H}_{26}\text{NO}_4\text{P}$   $[\text{M}+\text{H}]^+$ : 424.1678, Found: 424.1677.

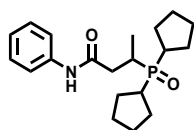

**3-(dicyclopentylphosphoryl)-N-phenylbutanamide (6f).** The reaction was conducted according to general procedure C, the reaction mixture was stirred at 100 °C for 24 hours. The product was purified by preparative TLC (1:20 MeOH:DCM) as white solid (22 mg, 62%).

$^1\text{H}$  NMR (400 MHz,  $\text{CDCl}_3$ ):  $\delta$  10.35 (s, 1H), 7.64-7.62 (m, 2H), 7.28-7.25 (m, 2H), 7.06-7.02 (m, 1H), 3.13-3.05 (m, 1H), 2.60-2.53 (m, 1H), 2.46-2.39 (m, 1H), 2.17-2.06 (m, 2H), 1.94-1.84 (m, 6H), 1.80-1.67 (m, 6H), 1.64-1.56 (m, 4H), 1.26 (dd,  $J = 15.5, 7.2$  Hz, 3H).

$^{13}\text{C}$  NMR (100 MHz,  $\text{CDCl}_3$ ):  $\delta$  170.11 (d,  $J_{\text{c-p}} = 9.7$  Hz), 139.15, 128.78, 123.59, 119.75, 38.67 (d,  $J_{\text{c-p}} = 2.0$  Hz), 36.76, 36.10, 35.46, 29.41 (d,  $J_{\text{c-p}} = 62.0$  Hz), 27.50 (d,  $J_{\text{c-p}} = 1.0$  Hz), 27.30 (d,  $J_{\text{c-p}} = 1.1$  Hz), 27.17 (d,  $J_{\text{c-p}} = 2.2$  Hz), 26.87 (d,  $J_{\text{c-p}} = 1.9$  Hz), 26.57 (d,  $J_{\text{c-p}} = 9.6$  Hz), 26.29 (d,  $J_{\text{c-p}} = 9.7$  Hz), 26.13 (d,  $J_{\text{c-p}} = 9.8$  Hz), 15.36.

$^{31}\text{P}$  NMR (162 MHz,  $\text{CDCl}_3$ ):  $\delta$  59.64.

HRMS (ESI): Calcd for  $\text{C}_{20}\text{H}_{30}\text{NO}_2\text{P}$   $[\text{M}+\text{H}]^+$ : 348.2092, Found: 348.2094.

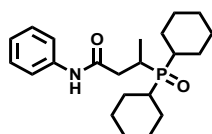

**3-(dicyclohexylphosphoryl)-N-phenylbutanamide (6g).** The reaction was conducted according to general procedure B,  $\text{CH}_3\text{OLi}$  (20 mol%, 0.02 mmol, 0.8 mg) was added, the reaction mixture was stirred at 100 °C for 24 hours. The product was purified by preparative TLC (1:20 MeOH:DCM) as white solid (34 mg, 91%).

$^1\text{H}$  NMR (400 MHz,  $\text{CDCl}_3$ ):  $\delta$  10.59 (s, 1H), 7.66 (d,  $J = 8.1$  Hz, 2H), 7.27 (t,  $J = 7.8$  Hz, 2H), 7.04 (t,  $J = 7.4$  Hz, 1H), 3.00-2.92 (m, 1H), 2.69-2.62 (m, 1H), 2.60-2.52 (m, 1H), 2.04-1.95 (m, 3H), 1.93-1.81 (m, 7H), 1.76-1.71 (m, 2H), 1.55-1.35 (m, 4H), 1.30-1.18 (m, 9H).

$^{13}\text{C}$  NMR (100 MHz,  $\text{CDCl}_3$ ):  $\delta$  169.91 (d,  $J_{\text{c-p}} = 10.2$  Hz), 139.29, 128.77, 123.54, 119.79, 38.62, 36.14 (d,  $J_{\text{c-p}} = 44.7$  Hz), 35.54 (d,  $J_{\text{c-p}} = 44.4$  Hz), 26.94 (d,  $J_{\text{c-p}} = 12.4$

Hz), 26.67 (d,  $J_{\text{c-p}} = 14.7$  Hz), 26.39, 26.22 (d,  $J_{\text{c-p}} = 2.5$  Hz), 26.12, 25.78, 14.93 (d,  $J_{\text{c-p}} = 4.0$  Hz).

$^{31}\text{P}$  NMR (162 MHz,  $\text{CDCl}_3$ ):  $\delta$  56.52.

HRMS (ESI): Calcd for  $\text{C}_{22}\text{H}_{34}\text{NO}_2\text{P}$   $[\text{M}+\text{H}]^+$ : 376.2405, Found: 376.2404.

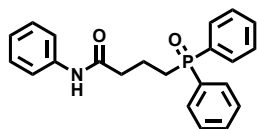

**4-(diphenylphosphoryl)-*N*-phenylbutanamide (7a).** The reaction was conducted according to general procedure D, the reaction mixture was stirred at 100 °C for 24 hours. The product was purified by preparative TLC (1:20 MeOH:DCM) as colorless oil (34 mg, 93%).

$^1\text{H}$  NMR (400 MHz,  $\text{CDCl}_3$ ):  $\delta$  9.28 (s, 1H), 7.77-7.72 (m, 4H), 7.65-7.63 (m, 2H), 7.57-7.47 (m, 6H), 7.30 (t,  $J = 7.8$  Hz, 3H), 7.07 (t,  $J = 7.4$  Hz, 1H), 2.60 (t,  $J = 6.8$  Hz, 2H), 2.45-2.38 (m, 2H), 2.12-2.01 (m, 2H).

$^{13}\text{C}$  NMR (100 MHz,  $\text{CDCl}_3$ ):  $\delta$  171.11, 138.70, 132.24 (d,  $J_{\text{c-p}} = 98.9$  Hz), 132.18 (d,  $J_{\text{c-p}} = 6.1$  Hz), 130.85, 130.76, 129.06, 128.95, 123.87, 119.77, 37.21 (d,  $J_{\text{c-p}} = 7.1$  Hz), 27.75 (d,  $J_{\text{c-p}} = 71.3$  Hz), 19.21 (d,  $J = 4.6$  Hz).

$^{31}\text{P}$  NMR (162 MHz,  $\text{CDCl}_3$ ):  $\delta$  35.52.

HRMS (ESI): Calcd for  $\text{C}_{22}\text{H}_{22}\text{NO}_2\text{P}$   $[\text{M}+\text{H}]^+$ : 364.1466, Found: 364.1465.

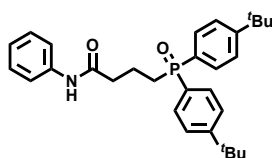

**4-(bis(4-(tert-butyl)phenyl)phosphoryl)-*N*-phenylbutanamide (7b).** The reaction was conducted according to general procedure D, the reaction mixture was stirred at 100 °C for 24 hours. The product was purified by preparative TLC (1:20 MeOH:DCM) as yellow oil (40 mg, 85%).

$^1\text{H}$  NMR (400 MHz,  $\text{CDCl}_3$ ):  $\delta$  9.69 (s, 1H), 7.67-7.62 (m, 6H), 7.48-7.45 (m, 4H), 7.29-7.25 (m, 2H), 7.06-7.02 (m, 1H), 2.59 (t,  $J = 6.9$  Hz, 2H), 2.39-2.33 (m, 2H), 2.09-1.98 (m, 2H), 1.30 (s, 18H).

$^{13}\text{C}$  NMR (100 MHz,  $\text{CDCl}_3$ ):  $\delta$  171.36, 155.58 (d,  $J_{\text{c-p}} = 2.4$  Hz), 138.81, 130.67 (d,  $J_{\text{c-p}} = 9.6$  Hz), 128.95, 125.99 (d,  $J_{\text{c-p}} = 11.9$  Hz), 123.77, 119.71, 37.28 (d,  $J_{\text{c-p}} = 5.7$  Hz), 31.20, 27.78 (d,  $J_{\text{c-p}} = 71.2$  Hz), 19.52 (d,  $J_{\text{c-p}} = 4.3$  Hz).

$^{31}\text{P}$  NMR (162 MHz,  $\text{CDCl}_3$ ):  $\delta$  35.59.

HRMS (ESI): Calcd for C<sub>30</sub>H<sub>38</sub>NO<sub>2</sub>P [M+H]<sup>+</sup>: 476.2718, Found: 476.2728.

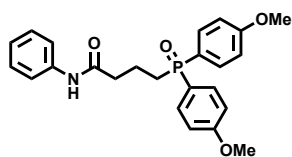

**4-(bis(4-methoxyphenyl)phosphoryl)-N-phenylbutanamide (7c).** The reaction was conducted according to general procedure D, the reaction mixture was stirred at 100 °C for 24 hours. The product was purified by preparative TLC (1:20 MeOH:DCM) as yellow solid (36 mg, 85%).

<sup>1</sup>H NMR (400 MHz, CDCl<sub>3</sub>): δ 9.71 (s, 1H), 7.64-7.57 (m, 6H), 7.27-7.23 (m, 2H), 7.05-7.01 (m, 1H), 6.96-6.92 (m, 4H), 3.80 (s, 6H), 2.56 (t, *J* = 7.0 Hz, 2H), 2.34-2.28 (m, 2H), 2.05-1.94 (m, 2H).

<sup>13</sup>C NMR (100 MHz, CDCl<sub>3</sub>): δ 171.32, 162.48 (d, *J*<sub>c-p</sub> = 2.8 Hz), 138.84, 132.58 (d, *J*<sub>c-p</sub> = 10.6 Hz), 128.87, 124.04, 123.68, 123.00, 119.68, 114.45 (d, *J*<sub>c-p</sub> = 12.7 Hz), 37.22 (d, *J*<sub>c-p</sub> = 8.0 Hz), 28.13 (d, *J*<sub>c-p</sub> = 72.1 Hz), 19.29 (d, *J*<sub>c-p</sub> = 4.3 Hz).

<sup>31</sup>P NMR (162 MHz, CDCl<sub>3</sub>): δ 35.38.

HRMS (ESI): Calcd for C<sub>24</sub>H<sub>26</sub>NO<sub>4</sub>P [M+H]<sup>+</sup>: 424.1678 Found: 424.1674.

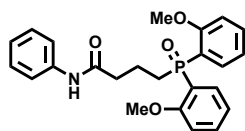

**4-(bis(2-methoxyphenyl)phosphoryl)-N-phenylbutanamide (7d).** The reaction was conducted according to general procedure D, the reaction mixture was stirred at 100 °C for 24 hours. The product was purified by preparative TLC (1:20 MeOH:DCM) as yellow solid (35 mg, 82%). The NMR spectra of product contained corresponding branched product.

<sup>1</sup>H NMR (400 MHz, CDCl<sub>3</sub>): δ 10.43 (s, 1H), 7.77-7.75 (m, 2H), 7.60-7.50 (m, 5H), 7.30-7.26 (m, 2H), 7.06-7.01 (m, 3H), 6.95-6.92 (m, 2H), 3.61 (s, 6H), 2.75-2.68 (m, 2H), 2.52-2.49 (m, 2H), 1.97-1.84 (m, 2H).

<sup>13</sup>C NMR (100 MHz, CDCl<sub>3</sub>): δ 171.91, 160.78 (d, *J*<sub>c-p</sub> = 3.5 Hz), 139.16, 134.00, 133.90 (d, *J*<sub>c-p</sub> = 7.1 Hz), 128.64, 123.30, 120.91 (d, *J*<sub>c-p</sub> = 11.5 Hz), 119.63, 119.24 (d, *J*<sub>c-p</sub> = 100.9 Hz), 110.92 (d, *J*<sub>c-p</sub> = 6.6 Hz), 55.38, 37.25 (d, *J*<sub>c-p</sub> = 6.0 Hz), 26.93 (d, *J*<sub>c-p</sub> = 72.9 Hz), 20.31 (d, *J*<sub>c-p</sub> = 4.9 Hz).

<sup>31</sup>P NMR (162 MHz, CDCl<sub>3</sub>): δ 38.62.

HRMS (ESI): Calcd for C<sub>24</sub>H<sub>26</sub>NO<sub>4</sub>P [M+H]<sup>+</sup>: 424.1678 Found: 424.1677.

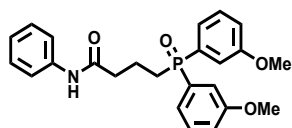

**4-(bis(3-methoxyphenyl)phosphoryl)-*N*-phenylbutanamide (7e).** The reaction was conducted according to general procedure D, the reaction mixture was stirred at 100 °C for 24 hours. The product was purified by preparative TLC (1:20 MeOH:DCM) as yellow oil (33 mg, 79%). The NMR spectra of product contained corresponding branched product.

$^1\text{H}$  NMR (400 MHz,  $\text{CDCl}_3$ ):  $\delta$  8.60 (s, 1H), 7.58-7.56 (m, 2H), 7.42-7.37 (m, 2H), 7.31-7.21 (m, 6H), 7.10-7.06 (m, 3H), 3.80 (s, 1H), 2.58 (t,  $J = 6.8$  Hz, 2H), 2.46-2.39 (m, 2H), 2.11-2.04 (m, 2H).

$^{13}\text{C}$  NMR (100 MHz,  $\text{CDCl}_3$ ):  $\delta$  160.03 (d,  $J_{\text{c-p}} = 15.0$  Hz), 138.18, 132.08 (d,  $J_{\text{c-p}} = 99.8$  Hz), 130.42 (d,  $J_{\text{c-p}} = 14.3$  Hz), 129.03, 124.29, 122.74 (d,  $J_{\text{c-p}} = 10.2$  Hz), 119.93, 118.62 (d,  $J_{\text{c-p}} = 3.0$  Hz), 115.85 (d,  $J_{\text{c-p}} = 10.7$  Hz), 55.57, 37.06 (d,  $J_{\text{c-p}} = 9.4$  Hz), 27.75 (d,  $J_{\text{c-p}} = 71.5$  Hz), 18.59 (d,  $J_{\text{c-p}} = 4.8$  Hz).

$^{31}\text{P}$  NMR (162 MHz,  $\text{CDCl}_3$ ):  $\delta$  39.15.

HRMS (ESI): Calcd for  $\text{C}_{24}\text{H}_{26}\text{NO}_4\text{P}$   $[\text{M}+\text{H}]^+$ : 424.1678 Found: 424.1678.

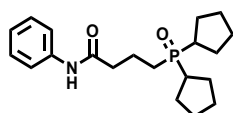

**4-(dicyclopentylphosphoryl)-*N*-phenylbutanamide (7f).** The reaction was conducted according to general procedure D, NaOH (20 mol%, 0.02 mmol, 0.8 mg) was added, the reaction mixture was stirred at 100 °C for 24 hours. The product was purified by preparative TLC (1:20 MeOH:DCM) as green solid (27 mg, 79%).

$^1\text{H}$  NMR (400 MHz,  $\text{CDCl}_3$ ):  $\delta$  9.63 (s, 1H), 7.63 (d,  $J = 7.9$  Hz, 2H), 7.29 (d,  $J = 7.7$  Hz, 2H), 7.05 (t,  $J = 7.4$  Hz, 1H), 2.63 (t,  $J = 6.9$  Hz, 2H), 2.16-2.03 (m, 5H), 1.94-1.85 (m, 4H), 1.82-1.75 (m, 4H), 1.73-1.58 (m, 9H).

$^{13}\text{C}$  NMR (100 MHz,  $\text{CDCl}_3$ ):  $\delta$  171.33, 138.86, 128.89, 123.73, 119.62, 37.75 (d,  $J_{\text{c-p}} = 6.1$  Hz), 37.68, 37.01, 26.97 (d,  $J_{\text{c-p}} = 1.3$  Hz), 26.78 (d,  $J_{\text{c-p}} = 1.7$  Hz), 26.54 (d,  $J_{\text{c-p}} = 4.8$  Hz), 26.44 (d,  $J_{\text{c-p}} = 4.8$  Hz), 23.89 (d,  $J_{\text{c-p}} = 61.9$  Hz), 19.80 (d,  $J_{\text{c-p}} = 4.8$  Hz).

$^{31}\text{P}$  NMR (162 MHz,  $\text{CDCl}_3$ ):  $\delta$  56.65.

HRMS (ESI): Calcd for  $\text{C}_{20}\text{H}_{30}\text{NO}_2\text{P}$   $[\text{M}+\text{H}]^+$ : 348.2092, Found: 348.2097.



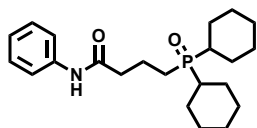

**4-(dicyclohexylphosphoryl)-N-phenylbutanamide (7g).** The reaction was conducted according to general procedure D, NaOH (20 mol%, 0.02 mmol, 0.8 mg) was added, the reaction mixture was stirred at 100 °C for 24 hours. The product was purified by preparative TLC (1:20 MeOH:DCM) as white solid (33 mg, 88%).

<sup>1</sup>H NMR (400 MHz, CDCl<sub>3</sub>): δ 9.67 (s, 1H), 7.65-7.62 (m, 2H), 7.30-7.26 (m, 2H), 7.07-7.03 (m, 1H), 2.61 (t, *J* = 6.8 Hz, 2H), 2.17-2.06 (m, 2H), 1.99-1.93 (m, 2H), 1.85-1.73 (m, 11H), 1.39-1.18 (m, 11H).

<sup>13</sup>C NMR (100 MHz, CDCl<sub>3</sub>): δ 171.38, 138.85, 128.86, 123.66, 119.62, 37.75 (d, *J*<sub>c-p</sub> = 5.6 Hz), 36.58, 35.95, 26.69 (d, *J*<sub>c-p</sub> = 2.2 Hz), 26.57 (d, *J*<sub>c-p</sub> = 2.3 Hz), 25.98, 25.67 (d, *J*<sub>c-p</sub> = 2.7 Hz), 21.54 (d, *J*<sub>c-p</sub> = 59.5 Hz), 19.85 (d, *J*<sub>c-p</sub> = 4.9 Hz).

<sup>31</sup>P NMR (162 MHz, CDCl<sub>3</sub>): δ 54.25.

HRMS (ESI): Calcd for C<sub>22</sub>H<sub>34</sub>NO<sub>2</sub>P [M+H]<sup>+</sup>: 376.2405, Found: 376.2407.

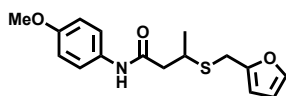

**3-((furan-2-ylmethyl)thio)-N-(4-methoxyphenyl)butanamide (8a).** The reaction was conducted according to general procedure A, the reaction mixture was stirred at 80 °C for 24 hours. The product was purified by preparative TLC (1:10 EA:PE) as yellow solid (29 mg, 96%).

<sup>1</sup>H NMR (400 MHz, CDCl<sub>3</sub>): δ 7.72 (s, 1H), 7.40-7.26 (m, 3H), 6.84 (d, *J* = 8.5 Hz, 2H), 6.26 (d, *J* = 35.0 Hz, 2H), 3.85-3.78 (m, 5H), 3.31-3.23 (m, 1H), 2.57-2.42 (m, 2H), 1.35 (d, *J* = 6.9 Hz, 3H).

<sup>13</sup>C NMR (100 MHz, CDCl<sub>3</sub>): δ 168.91, 156.47, 151.53, 142.26, 130.92, 121.97, 114.15, 110.72, 55.56, 44.85, 37.18, 27.70, 21.54.

HRMS (ESI): Calcd for C<sub>16</sub>H<sub>19</sub>NO<sub>3</sub>S [M+H]<sup>+</sup>: 306.1164 Found: 306.1168.

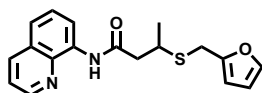

**3-((furan-2-ylmethyl)thio)-N-(quinolin-8-yl)butanamide (8b).** The reaction was conducted according to general procedure A, the reaction mixture was stirred at 80 °C for 24 hours. The product was purified by preparative TLC (1:20 EA/PE) as yellow oil (32 mg, 99%).

$^1\text{H}$  NMR (400 MHz,  $\text{CDCl}_3$ ):  $\delta$  9.88 (s, 1H), 8.81-8.77 (m, 2H), 8.17-8.15 (m, 1H), 7.55-7.44 (m, 3H), 7.37-7.36 (m, 1H), 6.31-6.25 (m, 2H), 3.90-3.80 (m, 2H), 3.47-3.38 (m, 1H), 2.85 (dd,  $J = 14.6, 6.2$  Hz, 1H), 2.65 (dd,  $J = 14.8, 7.9$  Hz, 1H), 1.41 (d,  $J = 6.7$  Hz, 3H).

$^{13}\text{C}$  NMR (100 MHz,  $\text{CDCl}_3$ ):  $\delta$  169.31, 151.68, 148.29, 142.22, 138.40, 136.47, 134.41, 128.01, 127.48, 121.76, 116.63, 110.64, 107.67, 45.95, 37.03, 27.89, 21.40.

HRMS (ESI): Calcd for  $\text{C}_{18}\text{H}_{18}\text{N}_2\text{O}_2\text{S}$   $[\text{M}+\text{H}]^+$ : 327.1167, Found: 327.1164.

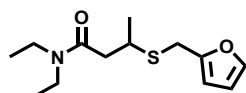

***N,N*-diethyl-3-((furan-2-ylmethyl)thio)butanamide (8c)**. The reaction was conducted according to general procedure A, the reaction mixture was stirred at 80 °C for 24 hours. The product was purified by preparative TLC (1:10 EA/PE) as yellow oil (24 mg, 96%).

$^1\text{H}$  NMR (400 MHz,  $\text{CDCl}_3$ ):  $\delta$  7.34-7.33 (m, 1H), 6.29-6.20 (m, 2H), 3.84-3.75 (m, 2H), 3.38-3.33 (m, 3H), 3.30-3.24 (m, 2H), 2.61-2.56 (m, 1H), 2.42-2.36 (m, 1H), 1.29 (d,  $J = 6.7$  Hz, 3H), 1.16-1.08 (m, 6H).

$^{13}\text{C}$  NMR (100 MHz,  $\text{CDCl}_3$ ):  $\delta$  169.82, 151.86, 142.10, 110.61, 107.50, 42.14, 40.71, 40.46, 37.08, 27.96, 21.56, 14.56, 13.21.

HRMS (ESI): Calcd for  $\text{C}_{13}\text{H}_{21}\text{NO}_2\text{S}$   $[\text{M}+\text{H}]^+$ : 256.1371, Found: 256.1376.

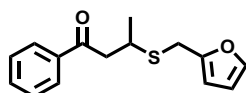

**3-((furan-2-ylmethyl)thio)-1-phenylbutan-1-one (8d)**. The reaction was conducted according to general procedure A, the reaction mixture was stirred at 80 °C for 24 hours. The product was purified by preparative TLC (1:10 EA/PE) as yellow oil (19 mg, 73%).

$^1\text{H}$  NMR (400 MHz,  $\text{CDCl}_3$ ):  $\delta$  7.93-7.91 (m, 2H), 7.59-7.55 (m, 1H), 7.48-7.44 (m, 2H), 7.35-7.34 (m, 1H), 6.30-6.29 (m, 1H), 6.20-6.19 (m, 1H), 3.86-3.77 (m, 2H), 3.50-3.42 (m, 1H), 3.30-3.24 (m, 1H), 3.11-3.05 (m, 1H), 1.34 (d,  $J = 6.7$  Hz, 3H).

$^{13}\text{C}$  NMR (100 MHz,  $\text{CDCl}_3$ ):  $\delta$  198.09, 151.76, 142.19, 136.92, 133.39, 128.77, 128.21, 110.64, 107.59, 46.07, 35.71, 27.83, 21.52.

HRMS (ESI): Calcd for  $\text{C}_{15}\text{H}_{16}\text{O}_2\text{S}$   $[\text{M}+\text{H}]^+$ : 261.0949, Found: 261.0948c.

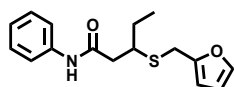

**3-((furan-2-ylmethyl)thio)-N-phenylpentanamide (8e).** The reaction was conducted according to general procedure A, the reaction mixture was stirred at 80 °C for 48 hours. The product was purified by preparative TLC (1:10 EA/PE) as brown solid (29 mg, 99%).

$^1\text{H}$  NMR (400 MHz,  $\text{CDCl}_3$ ):  $\delta$  7.87 (s, 1H), 7.52-7.50 (m, 2H), 7.33-7.29 (m, 3H), 7.12-7.08 (m, 1H), 6.30-6.21 (m, 2H), 3.84-3.73 (m, 2H), 3.10-3.03 (m, 1H), 2.61-2.56 (m, 1H), 2.51-2.45 (m, 1H), 1.72-1.56 (m, 2H), 0.97 (t,  $J = 7.3$  Hz, 3H).

$^{13}\text{C}$  NMR (100 MHz,  $\text{CDCl}_3$ ):  $\delta$  169.41, 151.58, 142.27, 137.92, 129.07, 124.40, 120.03, 110.72, 107.95, 44.28, 43.48, 28.18, 27.99, 11.33.

HRMS (ESI): Calcd for  $\text{C}_{16}\text{H}_{19}\text{NO}_2\text{S}$   $[\text{M}+\text{H}]^+$ : 290.1215, Found: 290.1219.

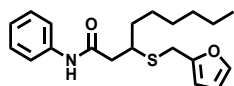

**3-((furan-2-ylmethyl)thio)-N-phenylnonanamide (8f).** The reaction was conducted according to general procedure A, the reaction mixture was stirred at 80 °C for 48 hours. The product was purified by preparative TLC (1:10 EA:PE) as yellow oil (31 mg, 90%). The NMR spectra of product contained corresponding starting material.

$^1\text{H}$  NMR (400 MHz,  $\text{CDCl}_3$ ):  $\delta$  7.77 (s, 1H), 7.52-7.48 (m, 2H), 7.34-7.30 (m, 3H), 7.10 (t,  $J = 7.4$  Hz, 1H), 6.31-6.30 (m, 1H), 6.22 (d,  $J = 3.2$  Hz, 1H), 3.85-3.73 (m, 2H), 3.13-3.07 (m, 1H), 2.61-2.56 (m, 1H), 2.51-2.45 (m, 1H), 1.63-1.55 (m, 2H), 1.44-1.36 (m, 2H), 1.34-1.22 (m, 6H), 0.86 (t,  $J = 6.9$  Hz, 3H).

$^{13}\text{C}$  NMR (100 MHz,  $\text{CDCl}_3$ ):  $\delta$  169.35, 151.60, 142.28, 137.93, 129.10, 124.41, 120.00, 110.75, 107.99, 43.94, 42.75, 35.24, 31.82, 29.10, 28.01, 26.82, 22.72, 14.23.

HRMS (ESI): Calcd for  $\text{C}_{20}\text{H}_{27}\text{NO}_2\text{S}$   $[\text{M}+\text{H}]^+$ : 346.1841 Found: 346.1840.

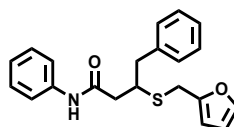

**3-((furan-2-ylmethyl)thio)-N,4-diphenylbutanamide (8g).** The reaction was conducted according to general procedure A, the reaction mixture was stirred at 80 °C for 48 hours. The product was purified by preparative TLC (1:10 EA:PE) as yellow oil (33 mg, 95%).

$^1\text{H}$  NMR (400 MHz,  $\text{CDCl}_3$ ):  $\delta$  7.73 (s, 1H), 7.50-7.48 (m, 2H), 7.32-7.28 (m, 5H), 7.25-7.19 (m, 3H), 7.11 (t,  $J = 7.4$  Hz, 1H), 6.30-6.28 (m, 1H), 6.17 (d,  $J = 3.2$  Hz, 1H), 3.77-3.59 (m, 2H), 3.41-3.34 (m, 1H), 2.92 (d,  $J = 7.2$  Hz, 2H), 2.62-2.57 (m, 1H), 2.46-2.40 (m, 1H).

$^{13}\text{C}$  NMR (100 MHz,  $\text{CDCl}_3$ ):  $\delta$  169.04, 151.24, 142.37, 138.40, 137.84, 129.56, 129.04, 128.57, 126.84, 124.41, 120.02, 110.66, 108.19, 43.43, 42.70, 42.15, 28.49.

HRMS (ESI): Calcd for  $\text{C}_{21}\text{H}_{21}\text{NO}_2\text{S}$   $[\text{M}+\text{H}]^+$ : 352.1371, Found: 352.1367.

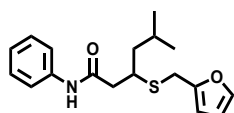

**3-((furan-2-ylmethyl)thio)-5-methyl-N-phenylhexanamide (8h).** The reaction was conducted according to general procedure A, the reaction mixture was stirred at 80 °C for 48 hours. The product was purified by preparative TLC (1:10 EA:PE) as yellow oil (25 mg, 79%). The NMR spectra of product contained corresponding starting material.

$^1\text{H}$  NMR (400 MHz,  $\text{CDCl}_3$ ):  $\delta$  7.79 (s, 1H), 7.53-7.50 (m, 2H), 7.34-7.30 (m, 3H), 7.11 (t,  $J = 7.4$  Hz, 1H), 6.32-6.31 (m, 1H), 6.23 (d,  $J = 3.2$  Hz, 1H), 3.86-3.73 (m, 2H), 3.19-3.12 (m, 1H), 2.61-2.56 (m, 1H), 2.50-2.44 (m, 1H), 1.85-1.76 (m, 1H), 1.51-1.37 (m, 2H), 0.88 (d,  $J = 6.6$  Hz, 3H), 0.82 (d,  $J = 6.5$  Hz, 3H).

$^{13}\text{C}$  NMR (100 MHz,  $\text{CDCl}_3$ ):  $\delta$  169.31, 151.62, 142.29, 137.94, 129.11, 124.41, 119.99, 110.80, 108.07, 44.29, 44.19, 40.61, 27.68, 25.47, 22.88, 22.46, 21.93.

HRMS (ESI): Calcd for  $\text{C}_{18}\text{H}_{23}\text{NO}_2\text{S}$   $[\text{M}+\text{H}]^+$ : 318.1528, Found: 318.1530.

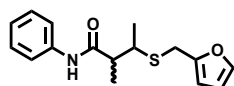

**3-((furan-2-ylmethyl)thio)-2-methyl-N-phenylbutanamide (8i).** The reaction was conducted according to general procedure A, the reaction mixture was stirred at 80 °C for 48 hours. The product was purified by preparative TLC (1:10 EA:PE) as brown oil (27 mg, 95%). The dr value is 5:1 analysis by GCMS.

$^1\text{H}$  NMR (400 MHz,  $\text{CDCl}_3$ ):  $\delta$  8.03 (s, 1H), 7.54-7.50 (m, 2H), 7.37-7.33 (m, 3H), 7.12-7.08 (m, 1H), 6.35-6.30 (m, 1H), 6.23-6.20 (m, 1H), 3.88-3.72 (m, 2H), 3.10-2.97 (m, 1H), 2.54-2.39 (m, 1H), 1.31-1.24 (m, 6H).

$^{13}\text{C}$  NMR (100 MHz,  $\text{CDCl}_3$ ):  $\delta$  172.24, 172.22, 152.04, 151.28, 142.42, 142.20, 137.96, 129.10, 129.06, 124.40, 124.31, 120.00, 119.97, 110.77, 110.75, 107.97, 107.76, 47.91, 46.64, 43.93, 42.73, 28.15, 18.53, 18.18, 15.53, 14.24.

HRMS (ESI): Calcd for C<sub>16</sub>H<sub>19</sub>NO<sub>2</sub>S [M+H]<sup>+</sup>: 290.1215, Found: 290.1218.

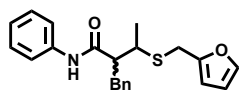

**2-benzyl-3-((furan-2-ylmethyl)thio)-N-phenylbutanamide (8j).** The reaction was conducted according to general procedure A, the reaction mixture was stirred at 80 °C for 48 hours. The product was purified by preparative TLC (1:10 EA:PE) as white solid (32 mg, 88%). The dr value is 4:1 analysis by GCMS.

<sup>1</sup>H NMR (400 MHz, CDCl<sub>3</sub>): δ 7.50 (s, 0.63H), 7.38-7.35 (m, 2H), 7.30-7.26 (m, 3H), 7.23-7.16 (m, 5H), 7.10-7.06 (m, 1H), 6.81 (s, 0.26H), 6.35-6.24 (m, 1.3H), 6.02-6.02 (m, 0.6H), 3.89-3.70 (m, 2H), 3.18-2.95 (m, 3H), 2.57-2.42 (m, 1H), 1.44-1.35 (m, 3H).

<sup>13</sup>C NMR (100 MHz, CDCl<sub>3</sub>): δ 171.18, 170.75, 152.10, 151.38, 142.37, 142.25, 139.77, 139.60, 137.57, 137.51, 129.16, 129.02, 128.98, 128.71, 126.60, 126.55, 124.47, 124.44, 120.24, 120.21, 110.82, 107.89, 107.85, 56.63, 55.06, 42.45, 42.23, 36.71, 34.89, 28.32, 28.21, 18.61, 18.00.

HRMS (ESI): Calcd for C<sub>22</sub>H<sub>23</sub>NO<sub>2</sub>S [M+H]<sup>+</sup>: 366.1528, Found: 366.1529.

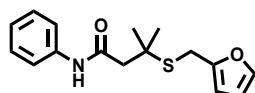

**3-((furan-2-ylmethyl)thio)-3-methyl-N-phenylbutanamide (8k).** The reaction was conducted according to general procedure A, the reaction mixture was stirred at 80 °C for 48 hours. The product was purified by preparative TLC (1:10 EA:PE) as yellow oil (22 mg, 75%).

<sup>1</sup>H NMR (400 MHz, CDCl<sub>3</sub>): δ 8.42 (s, 1H), 7.54-7.51 (m, 2H), 7.37-7.36 (m, 1H), 7.24-7.29 (m, 2H), 7.12-7.07 (m, 1H), 6.34-6.33 (m, 1H), 6.23-6.22 (m, 1H), 3.87 (s, 2H), 2.46 (s, 2H), 1.47 (s, 6H).

<sup>13</sup>C NMR (100 MHz, CDCl<sub>3</sub>): δ 168.51, 151.38, 142.25, 138.08, 129.05, 124.22, 119.91, 111.07, 107.95, 49.54, 44.83, 29.20, 25.90.

HRMS (ESI): Calcd for C<sub>16</sub>H<sub>19</sub>NO<sub>2</sub>S [M+H]<sup>+</sup>: 290.1215, Found: 290.1215.

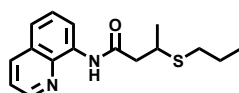

**3-(propylthio)-*N*-(quinolin-8-yl)butanamide (8l).** The reaction was conducted according to general procedure A, the reaction mixture was stirred at 80 °C for 24 hours. The product was purified by preparative TLC (1:20 EA/PE) as yellow oil (29 mg, 99%).

<sup>1</sup>H NMR (400 MHz, CDCl<sub>3</sub>): δ 9.92 (s, 1H), 8.81-8.77 (m, 2H), 8.16 (m, 1H), 7.56-7.44 (m, 3H), 3.46-3.38 (m, 1H), 2.89-2.84 (m, 1H), 2.71-2.65 (m, 1H), 2.60 (t, *J* = 7.4 Hz, 2H), 1.69-1.59 (m, 2H), 1.42 (d, *J* = 6.8 Hz, 3H), 0.98 (t, *J* = 7.3 Hz, 3H).

<sup>13</sup>C NMR (100 MHz, CDCl<sub>3</sub>): δ 169.60, 148.32, 138.43, 136.48, 134.45, 128.02, 127.50, 121.77, 121.75, 116.64, 46.29, 36.82, 33.17, 23.22, 21.86, 13.75.

HRMS (ESI): Calcd for C<sub>16</sub>H<sub>20</sub>N<sub>2</sub>OS [M+H]<sup>+</sup>: 289.1375, Found: 289.1374.

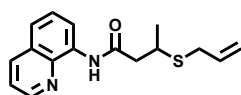

**3-(allylthio)-*N*-(quinolin-8-yl)butanamide (3m).** The reaction was conducted according to general procedure A, the reaction mixture was stirred at 80 °C for 24 hours. The product was purified by preparative TLC (1:20 EA/PE) as yellow oil (27 mg, 85%).

<sup>1</sup>H NMR (400 MHz, CDCl<sub>3</sub>): δ 9.91 (s, 1H), 8.82-8.77 (m, 2H), 8.16 (dd, *J* = 8.2, 1.5 Hz, 1H), 7.56-7.44 (m, 3H), 5.91-5.81 (m, 1H), 5.22-5.11 (m, 2H), 3.44-3.35 (m, 1H), 3.31-3.21 (m, 2H), 2.88 (dd, *J* = 14.6, 6.5 Hz, 1H), 2.68 (dd, *J* = 14.6, 7.9 Hz, 1H), 1.42 (d, *J* = 6.8 Hz, 3H).

<sup>13</sup>C NMR (100 MHz, CDCl<sub>3</sub>): δ 169.42, 148.31, 138.41, 136.49, 134.60, 134.43, 128.02, 127.50, 121.76, 117.36, 116.63, 46.00, 35.92, 34.40, 21.57.

HRMS (ESI): Calcd for C<sub>16</sub>H<sub>18</sub>N<sub>2</sub>OS [M+H]<sup>+</sup>: 287.1218, Found: 287.1215.

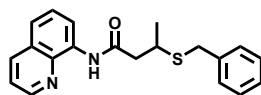

**3-(benzylthio)-*N*-(quinolin-8-yl)butanamide (3n).** The reaction was conducted according to general procedure A, the reaction mixture was stirred at 80 °C for 24 hours. The product was purified by preparative TLC (1:20 EA/PE) as yellow oil (33 mg, 99%).

<sup>1</sup>H NMR (400 MHz, CDCl<sub>3</sub>): δ 9.88 (s, 1H), 8.82-8.77 (m, 2H), 8.16 (dd, *J* = 8.3, 1.7 Hz, 1H), 7.56-7.44 (m, 3H), 7.38-7.35 (m, 2H), 7.31-7.26 (m, 2H), 7.23-7.20 (m, 1H), 3.88-3.80 (m, 2H), 3.41-3.32 (m, 1H), 2.85 (dd, *J* = 14.6, 6.4 Hz, 1H), 2.66 (dd, *J* = 14.6, 7.8 Hz, 1H), 1.40 (d, *J* = 6.8 Hz, 3H).

$^{13}\text{C}$  NMR (100 MHz,  $\text{CDCl}_3$ ):  $\delta$  169.39, 148.29, 138.42, 138.39, 136.46, 134.43, 128.98, 128.65, 128.02, 127.48, 127.10, 121.75, 116.66, 46.09, 36.87, 35.86, 21.60.

HRMS (ESI): Calcd for  $\text{C}_{20}\text{H}_{20}\text{N}_2\text{OS}$   $[\text{M}+\text{H}]^+$ : 337.1375, Found: 337.1375.

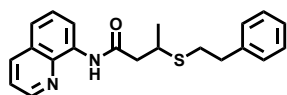

**3-(phenethylthio)-N-(quinolin-8-yl)butanamide (30).** The reaction was conducted according to general procedure A, the reaction mixture was stirred at 80 °C for 24 hours. The product was purified by preparative TLC (1:20 EA/PE) as yellow oil (32 mg, 90%).

$^1\text{H}$  NMR (400 MHz,  $\text{CDCl}_3$ ):  $\delta$  9.92 (s, 1H), 8.81-8.79 (m, 2H), 8.16 (dd,  $J = 8.2, 1.6$  Hz, 1H), 7.57-7.44 (m, 3H), 7.28-7.25 (m, 2H), 7.20-7.18 (m, 3H), 3.53-3.44 (m, 1H), 2.94-2.83 (m, 5H), 2.73-2.67 (m, 1H), 1.44 (d,  $J = 6.8$  Hz, 3H).

$^{13}\text{C}$  NMR (100 MHz,  $\text{CDCl}_3$ ):  $\delta$  169.46, 148.32, 140.62, 138.39, 136.47, 134.40, 128.60, 128.53, 128.01, 127.48, 126.43, 121.77, 116.64, 46.24, 37.04, 36.36, 32.67, 21.85.

HRMS (ESI): Calcd for  $\text{C}_{21}\text{H}_{22}\text{N}_2\text{OS}$   $[\text{M}+\text{H}]^+$ : 351.1531, Found: 351.1533.

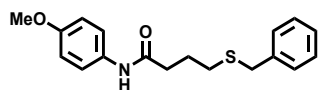

**4-(benzylthio)-N-(4-methoxyphenyl)butanamide (9a).** The reaction was conducted according to general procedure B, the reaction mixture was stirred at 80 °C for 48 hours. The product was purified by preparative TLC (1:10 EA:PE) as white solid (20 mg, 64%).

$^1\text{H}$  NMR (400 MHz,  $\text{CDCl}_3$ ):  $\delta$  7.39-7.35 (m, 2H), 7.32 (s, 1H), 7.30-7.27 (m, 4H), 7.25-7.20 (m, 1H), 6.88-6.82 (m, 2H), 3.78 (s, 3H), 3.70 (s, 2H), 2.50 (t,  $J = 6.9$  Hz, 2H), 2.40 (t,  $J = 7.3$  Hz, 2H), 2.00-1.93 (m, 2H).

$^{13}\text{C}$  NMR (100 MHz,  $\text{CDCl}_3$ ):  $\delta$  170.61, 156.44, 138.42, 130.98, 128.95, 128.62, 127.11, 121.91, 114.16, 55.57, 36.06, 35.88, 30.74, 24.64.

HRMS (ESI): Calcd for  $\text{C}_{18}\text{H}_{21}\text{NO}_2\text{S}$   $[\text{M}+\text{H}]^+$ : 316.1371, Found: 316.1371.

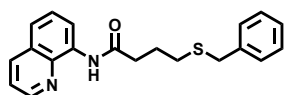

**4-(benzylthio)-*N*-(quinolin-8-yl)butanamide (9b).** The reaction was conducted according to general procedure B, the reaction mixture was stirred at 80 °C for 48 hours. The product was purified by preparative TLC (1:5 EA:PE) as yellow oil (25 mg, 75%).

<sup>1</sup>H NMR (400 MHz, CDCl<sub>3</sub>): δ 9.81 (s, 1H), 8.81 (dd, *J* = 4.2, 1.7 Hz, 1H), 8.77 (dd, *J* = 7.2, 1.8 Hz, 1H), 8.16 (dd, *J* = 8.3, 1.7 Hz, 1H), 7.56-7.49 (m, 2H), 7.46 (dd, *J* = 8.3, 4.3 Hz, 1H), 7.33-7.25 (m, 4H), 7.22-7.18 (m, 1H), 3.74 (s, 2H), 2.67 (t, *J* = 7.3 Hz, 2H), 2.57 (t, *J* = 7.1 Hz, 2H), 2.12-2.05 (m, 2H).

<sup>13</sup>C NMR (100 MHz, CDCl<sub>3</sub>): δ 171.09, 148.26, 138.42, 138.38, 136.49, 134.53, 128.98, 128.59, 128.03, 127.52, 127.06, 121.75, 121.58, 116.51, 36.70, 36.08, 30.73, 24.77.

HRMS (ESI): Calcd for C<sub>20</sub>H<sub>20</sub>N<sub>2</sub>OS [M+H]<sup>+</sup>: 337.1375, Found: 337.1375.

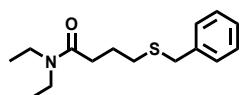

**4-(benzylthio)-*N,N*-diethylbutanamide (9c).** The reaction was conducted according to general procedure B, the reaction mixture was stirred at 80 °C for 48 hours. The product was purified by preparative TLC (1:10 EA:PE) as colorless oil (15 mg, 56%).

<sup>1</sup>H NMR (400 MHz, CDCl<sub>3</sub>): δ 7.31-7.28 (m, 4H), 7.25-7.20 (m, 1H), 3.70 (s, 2H), 3.35 (q, *J* = 7.1 Hz, 2H), 3.27 (q, *J* = 7.2 Hz, 2H), 2.48 (t, *J* = 6.9 Hz, 2H), 2.38 (t, *J* = 7.3 Hz, 2H), 1.96-1.89 (m, 2H), 1.15 (t, *J* = 7.2 Hz, 3H), 1.09 (t, *J* = 7.1 Hz, 3H).

<sup>13</sup>C NMR (100 MHz, CDCl<sub>3</sub>): δ 171.44, 138.56, 128.97, 128.58, 127.02, 42.00, 40.22, 36.03, 31.61, 31.01, 24.55, 14.46, 13.23.

HRMS (ESI): Calcd for C<sub>15</sub>H<sub>23</sub>NOS [M+H]<sup>+</sup>: 266.1579, Found: 266.1580.

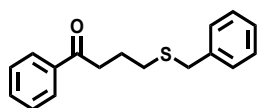

**4-(benzylthio)-1-phenylbutan-1-one (9d).** The reaction was conducted according to general procedure B, the reaction mixture was stirred at 80 °C for 48 hours. The product was purified by preparative TLC (1:10 EA:PE) as yellow oil (15 mg, 54%).

<sup>1</sup>H NMR (400 MHz, CDCl<sub>3</sub>): δ 7.95 (d, *J* = 8.1 Hz, 2H), 7.56 (t, *J* = 7.2 Hz, 1H), 7.46 (t, *J* = 7.5 Hz, 2H), 7.31-7.28 (m, 4H), 7.25-7.23 (m, 1H), 3.71 (s, 2H), 3.07 (t, *J* = 7.2 Hz, 2H), 2.53 (t, *J* = 6.9 Hz, 2H), 2.05-1.98 (m, 2H).



$^{13}\text{C}$  NMR (100 MHz,  $\text{CDCl}_3$ ):  $\delta$  199.74, 138.49, 136.96, 133.21, 129.00, 128.72, 128.64, 128.17, 127.10, 37.25, 36.10, 30.89, 23.36.

HRMS (ESI): Calcd for  $\text{C}_{17}\text{H}_{18}\text{OS}$   $[\text{M}+\text{H}]^+$ : 271.1157, Found: 271.1156.

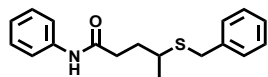

**4-(benzylthio)-*N*-phenylpentanamide (9e).** The reaction was conducted according to general procedure B, the reaction mixture was stirred at 80 °C for 48 hours. The product was purified by preparative TLC (1:10 EA:PE) as yellow oil (12 mg, 40%).

$^1\text{H}$  NMR (400 MHz,  $\text{CDCl}_3$ ):  $\delta$  7.47-7.45 (m, 2H), 7.33-7.28 (m, 5H), 7.25-7.17 (m, 2H), 7.14-7.09 (m, 2H), 3.79-3.70 (m, 2H), 2.78-2.71 (m, 1H), 2.45-2.41 (m, 2H), 2.06-1.97 (m, 1H), 1.89-1.80 (m, 1H), 1.32 (d,  $J = 6.7$  Hz, 3H).

$^{13}\text{C}$  NMR (100 MHz,  $\text{CDCl}_3$ ):  $\delta$  170.91, 138.73, 137.92, 129.11, 128.93, 128.65, 127.11, 124.37, 119.89, 39.40, 34.88, 34.77, 31.90, 21.74.

HRMS (ESI): Calcd for  $\text{C}_{18}\text{H}_{21}\text{NOS}$   $[\text{M}+\text{H}]^+$ : 300.1422, Found: 300.1422.

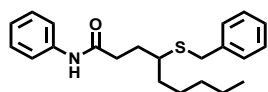

**4-(benzylthio)-*N*-phenylnonanamide (9f).** The reaction was conducted according to general procedure B, the reaction mixture was stirred at 80 °C for 48 hours. The product was purified by preparative TLC (1:10 EA:PE) as yellow oil (10 mg, 28%). The NMR spectra of product contained corresponding starting material.

$^1\text{H}$  NMR (400 MHz,  $\text{CDCl}_3$ ):  $\delta$  7.53-7.46 (m, 2H), 7.33-7.29 (m, 5H), 7.26-7.25 (m, 1H), 7.22-1.78 (m, 1H), 7.15-7.08 (m, 2H), 3.74-3.66 (m, 2H), 2.61-2.55 (m, 1H), 2.42 (t,  $J = 7.4$  Hz, 2H), 2.10-2.02 (m, 1H), 1.83-1.71 (m, 2H), 1.59-1.50 (m, 1H), 1.44-1.35 (m, 2H), 1.33-1.21 (m, 4H), 0.87 (t,  $J = 7.1$  Hz, 3H).

$^{13}\text{C}$  NMR (100 MHz,  $\text{CDCl}_3$ ):  $\delta$  171.13, 138.93, 137.98, 129.09, 129.03, 128.61, 127.09, 124.32, 119.89, 45.19, 35.22, 34.80, 34.76, 31.83, 29.87, 26.61, 22.70, 14.20.

HRMS (ESI): Calcd for  $\text{C}_{22}\text{H}_{29}\text{NOS}$   $[\text{M}+\text{H}]^+$ : 356.2048, Found: 356.2046.

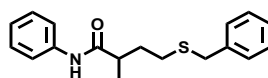

**4-(benzylthio)-2-methyl-*N*-phenylbutanamide (9g).** The reaction was conducted according to general procedure B, the reaction mixture was stirred at 80 °C for 48 hours.

The product was purified by preparative TLC (1:10 EA:PE) as white solid (21 mg, 69%).

$^1\text{H}$  NMR (400 MHz,  $\text{CDCl}_3$ ):  $\delta$  7.50-7.48 (m, 2H), 7.42 (s, 1H), 7.33-7.25 (m, 6H), 7.23-7.19 (m, 1H), 7.13-7.08 (m, 1H), 3.70 (s, 2H), 2.56-2.42 (m, 3H), 2.06-1.97 (m, 1H), 1.71-1.63 (m, 1H), 1.19 (d,  $J = 6.8$  Hz, 3H).

$^{13}\text{C}$  NMR (100 MHz,  $\text{CDCl}_3$ ):  $\delta$  174.19, 138.35, 137.92, 129.07, 128.91, 128.64, 127.15, 124.36, 119.94, 40.78, 36.23, 33.23, 29.44, 17.84.

HRMS (ESI): Calcd for  $\text{C}_{18}\text{H}_{21}\text{NOS}$   $[\text{M}+\text{H}]^+$ : 300.1422, Found: 300.1426.

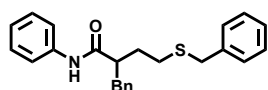

**2-benzyl-4-(benzylthio)-*N*-phenylbutanamide (9h).** The reaction was conducted according to general procedure B, the reaction mixture was stirred at 80 °C for 48 hours. The product was purified by preparative TLC (1:10 EA:PE) as white solid (30 mg, 80%).

$^1\text{H}$  NMR (400 MHz,  $\text{CDCl}_3$ ):  $\delta$  7.32-7.30 (m, 2H), 7.29-7.28 (m, 2H), 7.27-7.26 (m, 2H), 7.25-7.18 (m, 8H), 7.11-7.07 (m, 2H), 3.69-3.61 (m, 2H), 3.04-2.99 (m, 1H), 2.76-2.71 (m, 1H), 2.70-2.63 (m, 1H), 2.61-2.54 (m, 1H), 2.46-2.39 (m, 1H), 2.15-2.06 (m, 1H), 1.79-1.71 (m, 1H).

$^{13}\text{C}$  NMR (100 MHz,  $\text{CDCl}_3$ ):  $\delta$  172.69, 139.49, 138.23, 137.49, 129.05, 128.98, 128.91, 128.71, 128.64, 127.16, 126.64, 124.51, 120.25, 49.19, 39.14, 36.00, 31.30, 29.34.

HRMS (ESI): Calcd for  $\text{C}_{24}\text{H}_{25}\text{NOS}$   $[\text{M}+\text{H}]^+$ : 376.1735, Found: 376.1734.

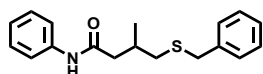

**4-(benzylthio)-3-methyl-*N*-phenylbutanamide (9i).** The reaction was conducted according to general procedure B, the reaction mixture was stirred at 80 °C for 48 hours. The product was purified by preparative TLC (1:10 EA:PE) as yellow oil (15 mg, 49%).

$^1\text{H}$  NMR (400 MHz,  $\text{CDCl}_3$ ):  $\delta$  7.49 (d,  $J = 7.7$  Hz, 2H), 7.41 (s, 1H), 7.33-7.28 (m, 6H), 7.24-7.20 (m, 1H), 7.10 (t,  $J = 7.4$  Hz, 1H), 3.74-3.67 (m, 2H), 2.53-2.44 (m, 3H), 2.35-2.27 (m, 1H), 2.20-2.14 (m, 1H), 1.06 (d,  $J = 6.6$  Hz, 3H).

$^{13}\text{C}$  NMR (100 MHz,  $\text{CDCl}_3$ ):  $\delta$  170.41, 138.43, 137.92, 129.08, 129.00, 128.62, 127.12, 124.38, 119.96, 43.67, 38.27, 36.66, 30.72, 19.87.

HRMS (ESI): Calcd for  $\text{C}_{18}\text{H}_{21}\text{NOS}$   $[\text{M}+\text{H}]^+$ : 300.1422, Found: 300.1423.

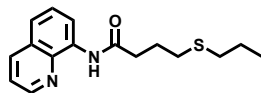

**4-(propylthio)-N-(quinolin-8-yl)butanamide (9j).** The reaction was conducted according to general procedure B, the reaction mixture was stirred at 80 °C for 24 hours. The product was purified by preparative TLC (1:10 EA:PE) as yellow oil (27 mg, 95%).

$^1\text{H}$  NMR (400 MHz,  $\text{CDCl}_3$ ):  $\delta$  9.83 (s, 1H), 8.79 (dd,  $J = 4.2, 1.7$  Hz, 1H), 8.76 (dd,  $J = 7.3, 1.8$  Hz, 1H), 8.15 (dd,  $J = 8.3, 1.7$  Hz, 1H), 7.55-7.43 (m, 3H), 2.71 (t,  $J = 7.3$  Hz, 2H), 2.66 (t,  $J = 7.1$  Hz, 2H), 2.52 (t,  $J = 7.2$  Hz, 2H), 2.14-2.07 (m, 2H), 1.66-1.57 (m, 2H), 0.98 (t,  $J = 7.3$  Hz, 3H).

$^{13}\text{C}$  NMR (100 MHz,  $\text{CDCl}_3$ ):  $\delta$  171.14, 148.23, 138.38, 136.46, 134.54, 128.01, 127.49, 121.69, 121.54, 116.51, 36.73, 34.08, 31.51, 25.26, 23.04, 13.61.

HRMS (ESI): Calcd for  $\text{C}_{16}\text{H}_{20}\text{N}_2\text{OS}$   $[\text{M}+\text{H}]^+$ : 289.1375, Found: 289.1374.

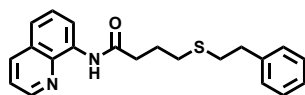

**4-(phenethylthio)-N-(quinolin-8-yl)butanamide (9k).** The reaction was conducted according to general procedure B, the reaction mixture was stirred at 80 °C for 24 hours. The product was purified by preparative TLC (1:10 EA:PE) as yellow oil (30 mg, 86%).

$^1\text{H}$  NMR (400 MHz,  $\text{CDCl}_3$ ):  $\delta$  9.84 (s, 1H), 8.80-8.77 (m, 2H), 8.16 (dd,  $J = 8.3, 1.7$  Hz, 1H), 7.56-7.43 (m, 3H), 7.30-7.26 (m, 2H), 7.22-7.18 (m, 3H), 2.92-2.87 (m, 2H), 2.84-2.79 (m, 2H), 2.72-2.67 (m, 4H), 2.15-2.08 (m, 2H).

$^{13}\text{C}$  NMR (100 MHz,  $\text{CDCl}_3$ ):  $\delta$  171.07, 148.25, 140.63, 138.38, 136.48, 134.53, 128.60, 128.55, 128.03, 127.51, 126.42, 121.72, 121.59, 116.54, 36.65, 36.38, 33.53, 31.69, 25.17.

HRMS (ESI): Calcd for  $\text{C}_{21}\text{H}_{22}\text{N}_2\text{OS}$   $[\text{M}+\text{H}]^+$ : 351.1531, Found: 351.1533.

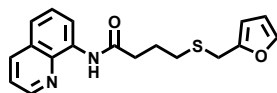

**4-((furan-2-ylmethyl)thio)-N-(quinolin-8-yl)butanamide (9I)**. The reaction was conducted according to general procedure B, the reaction mixture was stirred at 80 °C for 24 hours. The product was purified by preparative TLC (1:10 EA:PE) as yellow oil (22 mg, 69%).

<sup>1</sup>H NMR (400 MHz, CDCl<sub>3</sub>): δ 9.82 (s, 1H), 8.81 (dd, *J* = 4.2, 1.7 Hz, 1H), 8.76 (dd, *J* = 7.1, 1.8 Hz, 1H), 8.16 (dd, *J* = 8.3, 1.7 Hz, 1H), 7.56-7.44 (m, 3H), 7.33 (dd, *J* = 1.9, 0.9 Hz, 1H), 6.27-6.26 (m, 1H), 6.19-6.18 (m, 1H), 3.75 (s, 2H), 2.70-2.64 (m, 4H), 2.12-2.05 (m, 2H).

<sup>13</sup>C NMR (100 MHz, CDCl<sub>3</sub>): δ 171.06, 151.67, 148.29, 142.27, 138.44, 136.53, 134.58, 128.08, 127.55, 121.76, 121.61, 116.58, 110.53, 107.68, 36.67, 31.23, 28.22, 24.82

HRMS (ESI): Calcd for C<sub>18</sub>H<sub>18</sub>N<sub>2</sub>O<sub>2</sub>S [M+H]<sup>+</sup>: 327.1167, Found: 327.1165.

## V. Gram-scale reaction

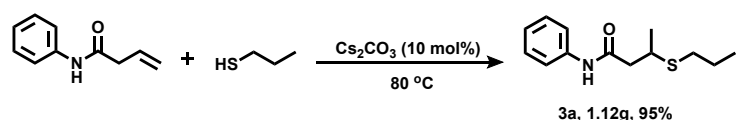

*General procedure for gram-scale reaction:* In a dry 100-mL Schlenk tube containing a magnetic stirbar was charged with Cs<sub>2</sub>CO<sub>3</sub> (10 mol%, 165 mg, 0.5 mmol), alkene 1a (1 equiv, 805 mg, 5 mmol) and 1-propanethiol (10 equiv, 3.80 g, 50 mmol). The mixture was stirred at 80 °C for 24 h. The reaction mixture was concentrated on a rotary evaporator, then the resulting residue was directly subjected to silica gel flash chromatography (1:10 EA:PE), product was obtained as yellow oil (1.12 g, 95%).

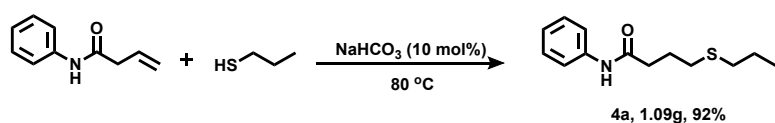

*General procedure for gram-scale reaction:* In a dry 100-mL Schlenk tube containing a magnetic stirbar was charged with NaHCO<sub>3</sub> (10 mol%, 42 mg, 0.5 mmol), alkene 1a (1 equiv, 805 mg, 5 mmol) and 1-propanethiol (10 equiv, 3.80 g, 50 mmol). The mixture was stirred at 80 °C for 24 h. The reaction mixture was concentrated on a rotary evaporator, then the resulting residue was directly subjected to silica gel flash chromatography (1:10 EA:PE), product was obtained as yellow oil (1.09 g, 92%).

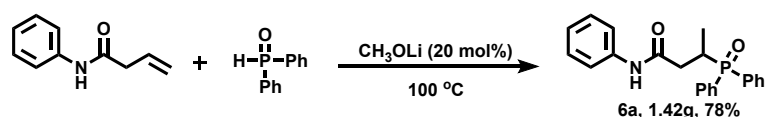

*General procedure for gram-scale reaction:* In a dry 100-mL Schlenk tube containing a magnetic stirbar was charged with CH<sub>3</sub>OLi (20 mol%, 38 mg, 1.0 mmol), alkene 1a (1 equiv, 805 mg, 5 mmol) and diphenylphosphine oxide (2 equiv, 2.02 g, 10 mmol). The mixture was stirred at 80 °C for 24 h. The reaction mixture was concentrated on a rotary evaporator, then the resulting residue was directly subjected to silica gel flash chromatography (1:50 MeOH:DCM), product was obtained as white solid (1.42 g, 78%).

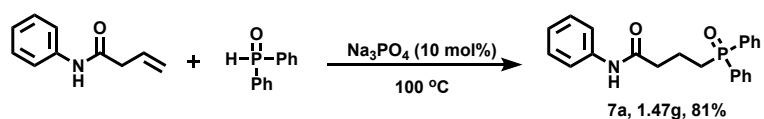

*General procedure for gram-scale reaction:* In a dry 100-mL Schlenk tube containing a magnetic stirbar was charged with Na<sub>3</sub>PO<sub>4</sub> (10 mol%, 82 mg, 0.5 mmol), alkene 1a (1 equiv, 805 mg, 5 mmol) and diphenylphosphine oxide (2 equiv, 2.02 g, 10 mmol). The mixture was stirred at 80 °C for 24 h. The reaction mixture was concentrated on a rotary evaporator, then the resulting residue was directly subjected to silica gel flash chromatography (1:50 MeOH:DCM), product was obtained as colorless oil (1.47 g, 81%).

## VI. Study on reaction progress

**Table S6.** Conditions for radical trapping experiment.

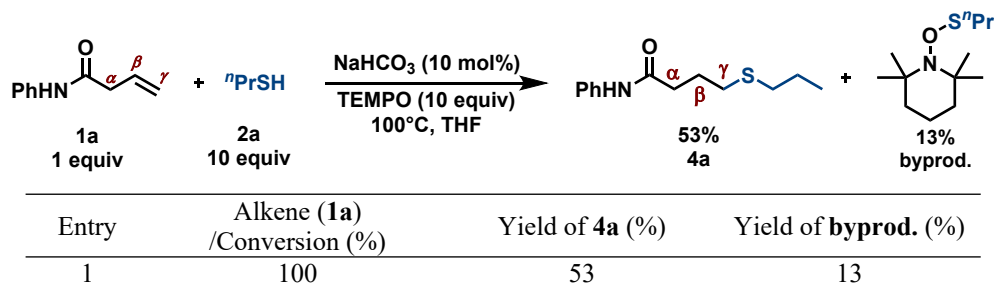

*General Procedure for radical trapping experiment:* To a dry 10-mL Schlenk tube containing a magnetic stir bar was charged with alkenes **1a** (1 equiv, 0.3 mmol, 48.3 mg), NaHCO<sub>3</sub> (10 mol%, 0.03 mmol, 2.7 mg), 1-propanethiol (10 equiv, 3.0 mmol, 228 mg), TEMPO (10 equiv, 3.0 mmol, 469 mg), THF (1.0 mL), 30  $\mu$ L dodecane sequentially. The tube was capped tightly and the mixture was vigorously stirred in a pre-warmed 80 °C oil bath. The reaction result was analyzed by GC.

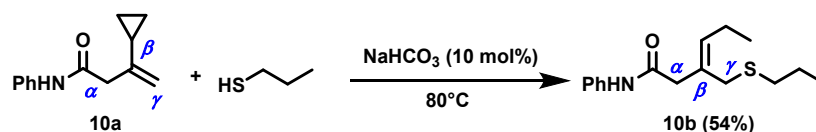

*General Procedure for radical clock experiment:* To a dry 10-mL Schlenk tube containing a magnetic stir bar was charged with alkenes **10a** (1 equiv, 0.1 mmol, 20.1 mg), NaHCO<sub>3</sub> (10 mol%, 0.01 mmol, 0.9 mg), 1-propanethiol (10 equiv, 1.0 mmol, 76 mg), 10  $\mu$ L dodecane sequentially. The tube was capped tightly and the mixture was vigorously stirred in a pre-warmed 80 °C oil bath. The product was purified by preparative TLC (1:10 EA:PE) as yellow oil (15 mg, 54%).

<sup>1</sup>H NMR (400 MHz, CDCl<sub>3</sub>):  $\delta$  7.70 (s, 1H), 7.52-7.49 (m, 2H), 7.33-7.30 (m, 2H), 7.11-7.08 (m, 1H), 5.62 (t,  $J$  = 7.8 Hz, 1H), 3.28 (s, 2H), 3.22 (s, 2H), 2.42 (t,  $J$  = 7.4 Hz), 2.18-2.10 (m, 2H), 1.64-1.59 (m, 2H), 1.03 (t,  $J$  = 7.5 Hz, 3H), 0.97 (t,  $J$  = 7.3 Hz, 3H).

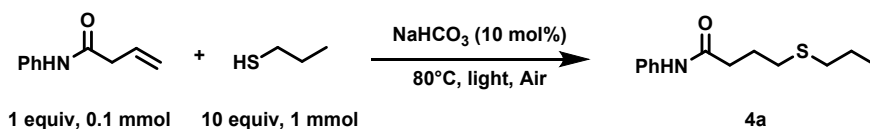

| Control Experiment | Yield of 4a |
|--------------------|-------------|
| no base            | 71%         |
| in dark            | 87%         |
| in Argon           | 38%         |

*General Procedure for control experiment:* To a dry 10-mL Schlenk tube containing a magnetic stir bar was charged with alkenes 1a (1 equiv, 0.1 mmol, 20.1 mg), NaHCO<sub>3</sub> (10 mol%, 0.01 mmol, 0.9 mg), 1-propanethiol (10 equiv, 1.0 mmol, 76 mg), 10  $\mu$ L dodecane sequentially. The tube was capped tightly and the mixture was vigorously stirred in a pre-warmed 80  $^\circ$ C oil bath. The reaction was monitored by GC.

Collectively, based on the mechanism studies in the **Scheme S1, eq 1 and 2**, two possible catalytic cycles for the regiodivergent hydrofunctionalization of  $\beta,\gamma$ -unsaturated amides have been proposed in **Scheme S1, eq 3**.

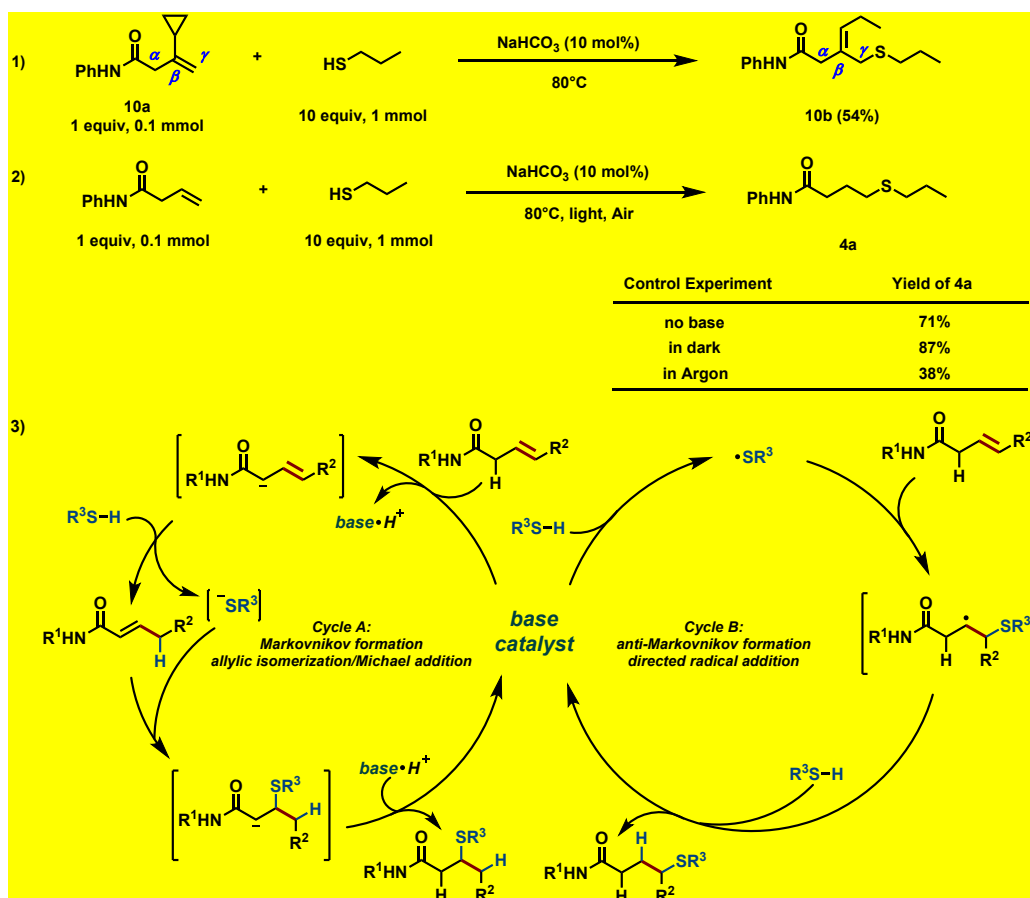



**Scheme S1.** Mechanism study and proposed catalytic cycles for the regiodivergent hydrofunctionalization of  $\beta,\gamma$ -unsaturated amides.

**Table S7.** Monitoring of the base-catalyzed conjugative isomerization of  $\beta,\gamma$ -unsaturated amide (**1a**).

| Entry | 1                        | 2                        | 3                       | 4                | 5                        |
|-------|--------------------------|--------------------------|-------------------------|------------------|--------------------------|
| Base  | $\text{Cs}_2\text{CO}_3$ | $\text{Na}_3\text{PO}_4$ | $\text{CH}_3\text{OLi}$ | $\text{NaHCO}_3$ | $\text{Na}_2\text{CO}_3$ |

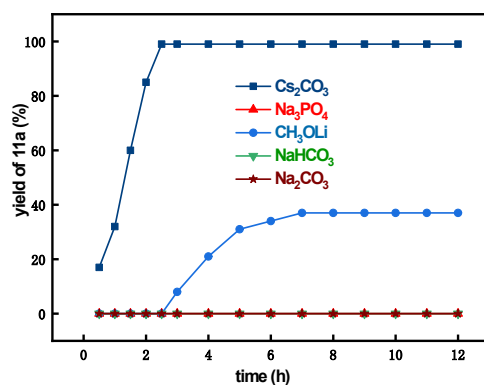

*General Procedure for conjugative isomerization of allyl amide:* To a dry 10-mL Schlenk tube containing a magnetic stir bar was charged with alkenes **1a** (1 equiv, 0.5 mmol, 81 mg), base (10 mol%), THF (5 mL), 50  $\mu\text{L}$  dodecane sequentially. The tube was capped tightly and the mixture was vigorously stirred in a pre-warmed 100  $^\circ\text{C}$  oil bath. The reaction process was monitored by GC hourly.

**Table S8.** Conditions for monitoring of reaction process.

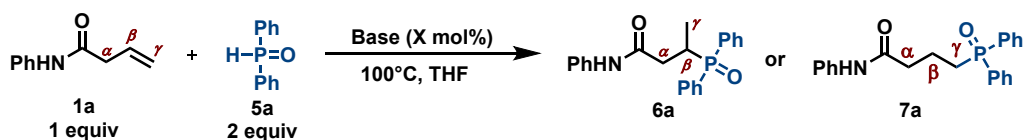

| Entry | Base                     | Amount of Base |
|-------|--------------------------|----------------|
| 1     | $\text{Cs}_2\text{CO}_3$ | 10 mol%        |
| 2     | $\text{Cs}_2\text{CO}_3$ | 50 mol%        |
| 3     | $\text{CH}_3\text{OLi}$  | 20 mol%        |
| 4     | $\text{Na}_3\text{PO}_4$ | 20 mol%        |

*General Procedure for reaction progress:* To a dry 10-mL Schlenk tube containing a magnetic stir bar was charged with alkenes 1a (1 equiv, 0.5 mmol, 81 mg), base (10-50 mol%), diphenylphosphine oxide (2 equiv, 1.0 mmol, 202 mg), THF (1 mL), 50 uL dodecane sequentially. The tube was capped tightly and the mixture was vigorously stirred in a pre-warmed 100 °C oil bath. The reaction process was monitored by GC hourly.

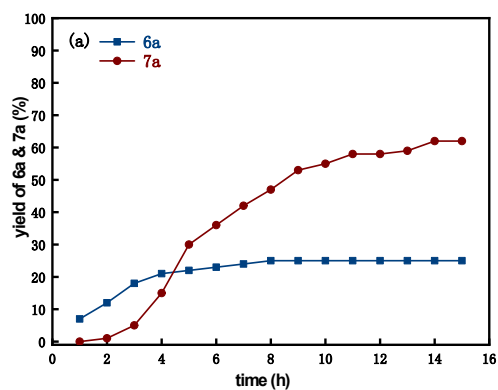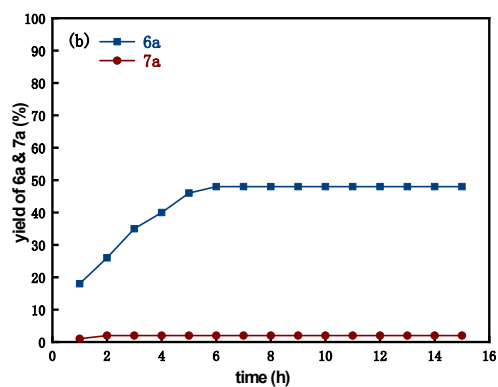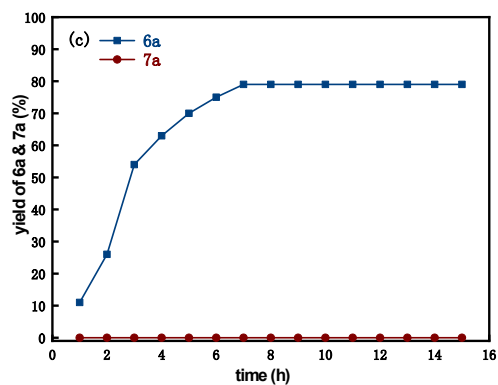

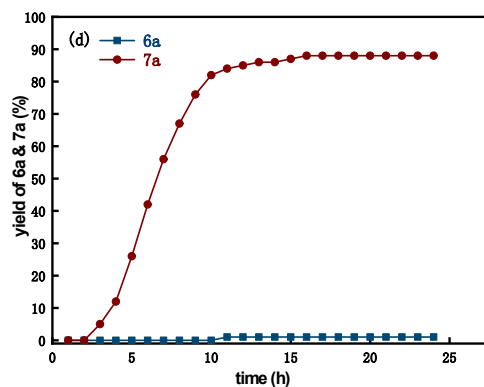

**Figure S1.** Monitoring of reaction progress. (a) Comparison of reaction rates for the formation of 6a and 6h in 10 mol% Cs<sub>2</sub>CO<sub>3</sub>. (b) Comparison of reaction rates for the formation of 6a and 6h in 50 mol% Cs<sub>2</sub>CO<sub>3</sub>. (c) Comparison of reaction rates for the formation of 6a and 6h in 20 mol% CH<sub>3</sub>OLi. (d) Comparison of reaction rates for the formation of 6a and 6h in 20 mol% Na<sub>3</sub>PO<sub>4</sub>.

## VII. Reference

- (1) Liu, T.; Yang, Y. H.; Wang, C. Y. Manganese-catalyzed Hydroarylation of Unactivated Alkenes. *Angew. Chem. Int. Ed.* **2020**, *59*, 14256-14260.
- (2) Wang, G. Z.; Liu, X. Y.; Chen, L. L.; Gao, Q.; Wang, J. G.; Zhang, P.; Peng, Q.; Xu, S. Iridium-Catalyzed Distal Hydroboration of Aliphatic Internal Alkenes. *Angew. Chem. Int. Ed.* **2019**, *58*, 8187-8191.
- (3) Smith, S. M.; Thacker, N. C.; Takacs, J. M.; Efficient Amide Directed Catalytic Asymmetric Hydroboration. *Org. Lett.* **2020**, *22*, 16, 6299-6303.
- (4) Lill, S. O. N.; Naredla, R. R.; Zielinski, M. E.; Knoecer, L.; Klumpp, D. A. Dicationic Ring-Opening Reactions of trans-2-Phenylcyclopropylamine·HCl: Electrophilic Cleavage of the Distal (C<sub>2</sub>-C<sub>3</sub>) Bond of Cyclopropanes. *J. Org. Chem.* **2013**, *78*, 8922-8926.
- (5) Smith, S. M.; Hoang, G. L.; Pal, R.; Khaled, M. O. B.; Takacs, J. M.  $\gamma$ -Selective Directed Catalytic Asymmetric Hydroboration of 1,1-Disubstituted Alkenes. *Chem. Commun.* **2012**, *48*, 12180-12182.
- (6) Tellitu, I.; Urrejola, A.; Serna, S.; Dominguez, E.; SanMartin, R.; Correa, A. On the Phenyliodine(III)-Bis(trifluoroacetate)-Mediated Olefin Amidohydroxylation Reaction. *Eur. J. Org. Chem.* **2007**, *3*, 437-444.
- (7) Ma, R. L.; White, M. C. C-H to C-N Cross-Coupling of Sulfonamides with Olefins. *J. Am. Chem. Soc.* **2018**, *140*, 3202-3205.
- (8) Wang, C. D.; Xiao, G. L.; Guo, T. Ding, Y. L.; Wu, X. J. Loh, T-P. Palladium-Catalyzed Regiocontrollable Reductive Heck Reaction of Unactivated Aliphatic Alkenes. *J. Am. Chem. Soc.* **2018**, *140*, 9332-9336.
- (9) Li, Z. Q.; Deng, R. H.; Fu, Y.; Liu, P.; Engle, K. M. Ligand-Controlled Regiodivergence in Nickel-Catalyzed Hydroarylation and Hydroalkenylation of Alkenyl Carboxylic Acids. *Angew. Chem. Int. Ed.* **2020**, *59*, 23306 -23312.
- (10) Rajendra, G.; Miller, M. J. Intramolecular Electrophilic Additions to Olefins in Organic Syntheses. Stereoselective Synthesis of 3,4-Substituted  $\beta$ -Lactams by Bromine-Induced Oxidative Cyclization of *O*-Acyl  $\beta$ ,  $\gamma$ -Unsaturated Hydroxamic Acid Derivatives. *J. Org. Chem.* **1987**, *52*, 4471-4477.
- (11) Li, Y.; Liang, Y.; Dong, J.; Deng, Y.; Zhao, C.; Su, Z.; Guan, W.; Bi, X.; Liu, Q.; Fu, J. Directed Copper-Catalyzed Intermolecular Aminative Difunctionalization of Unactivated Alkenes. *J. Am. Chem. Soc.* **2019**, *46*, 18475–18485.

# VIII. NMR spectra

## <sup>1</sup>H NMR spectra of 3a

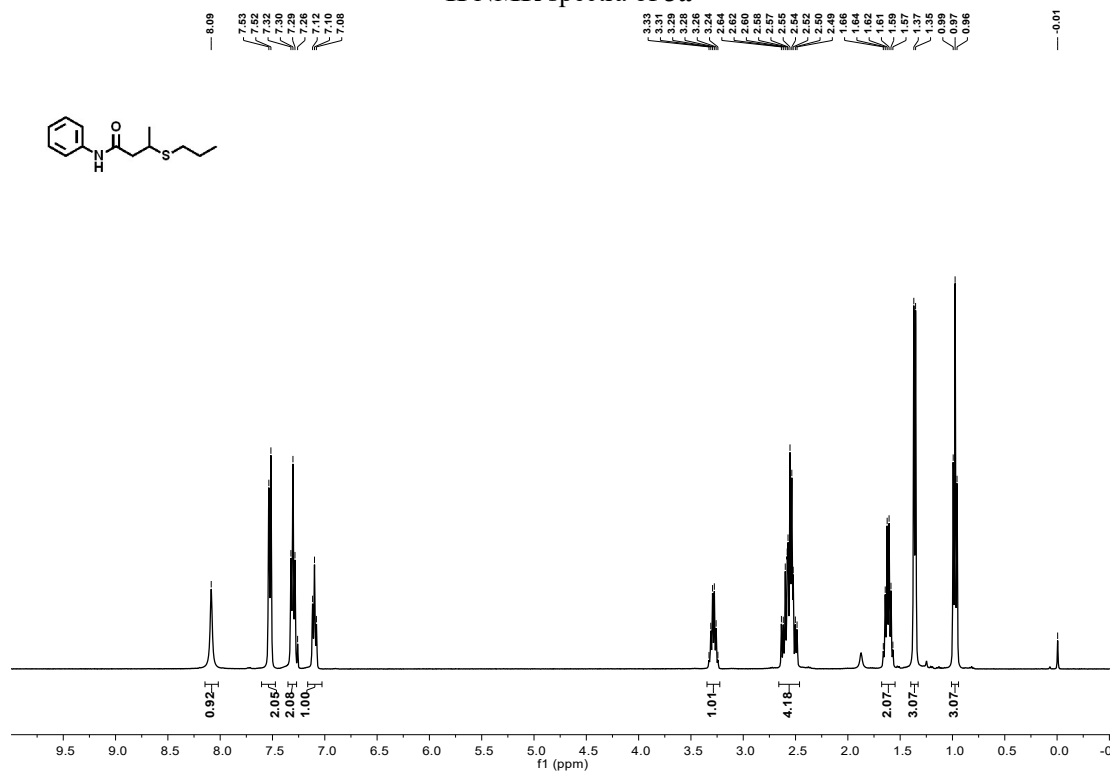

## <sup>13</sup>C NMR spectra of 3a

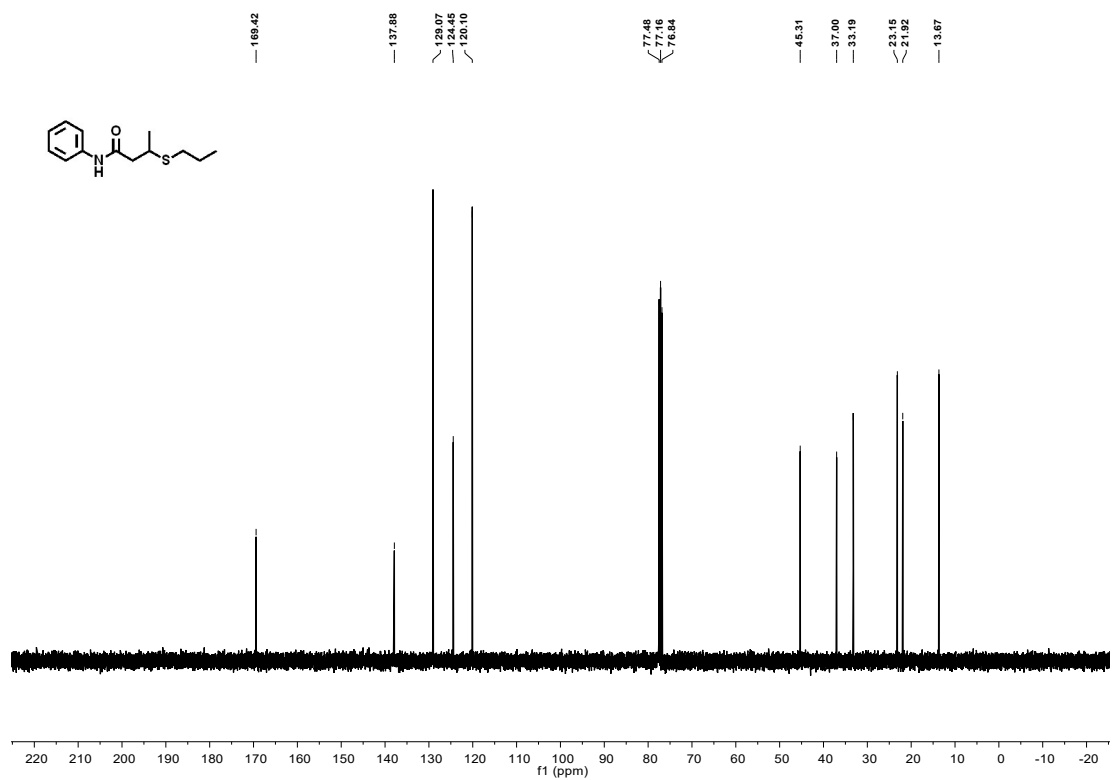

### <sup>1</sup>H NMR spectra of 3b

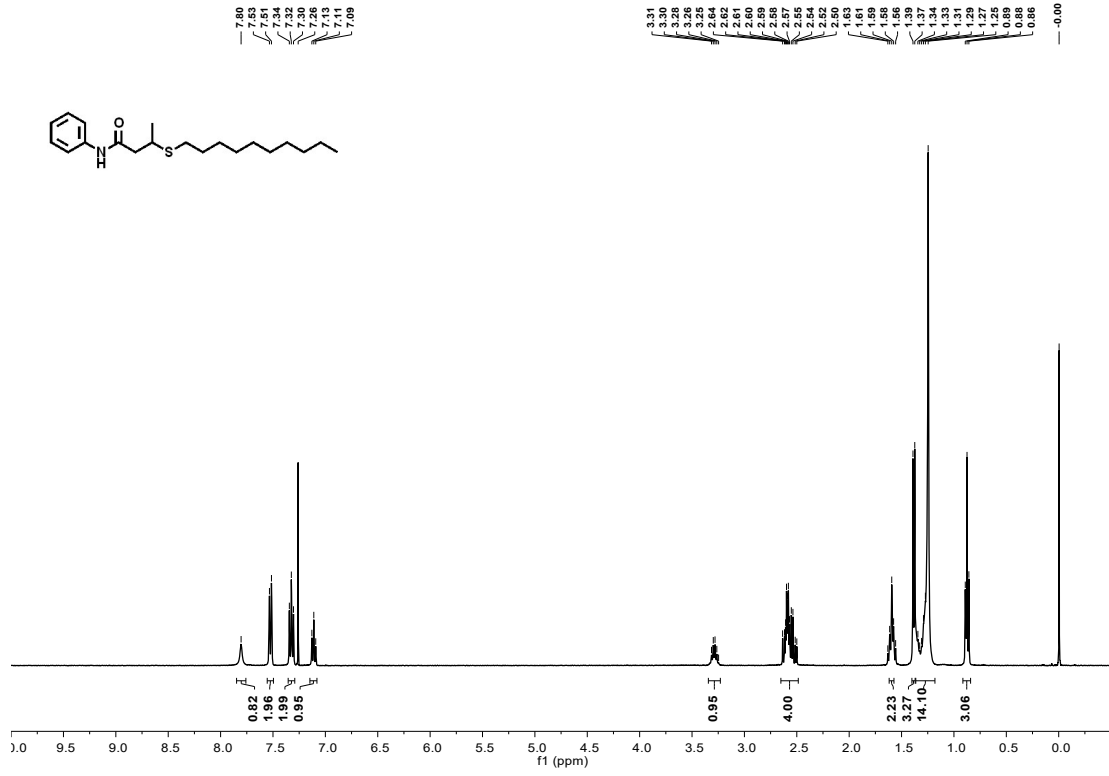

### <sup>13</sup>C NMR spectra of 3b

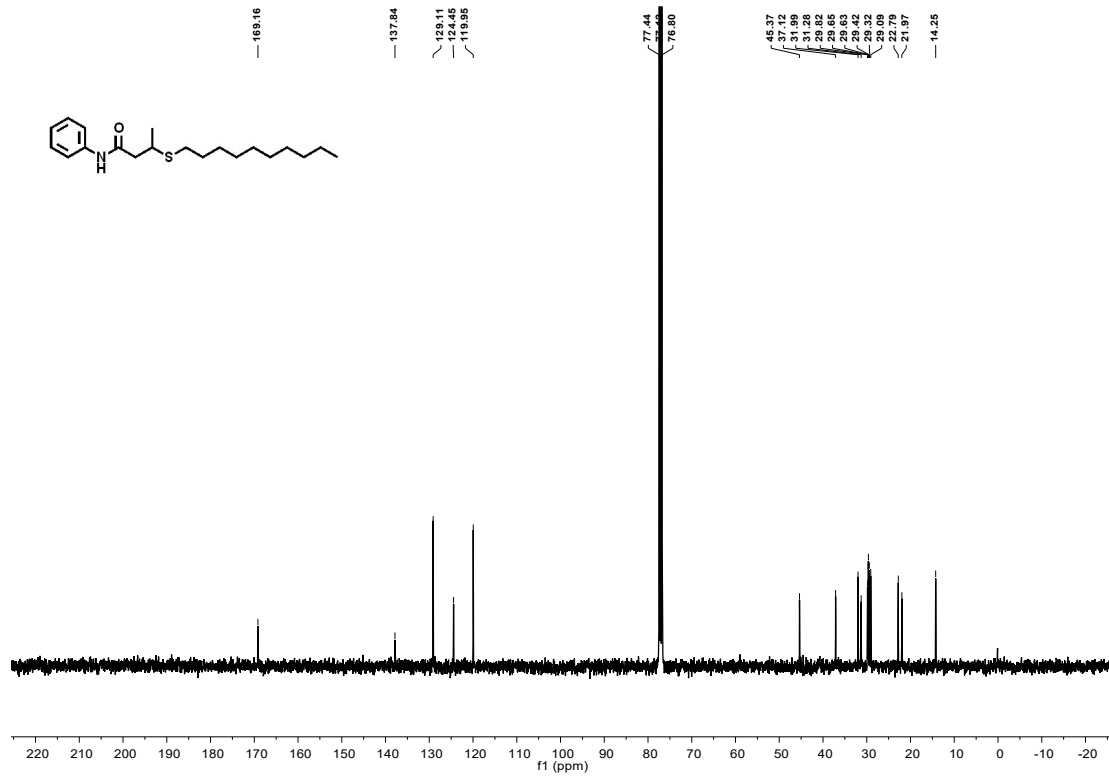

### <sup>1</sup>H NMR spectra of 3c

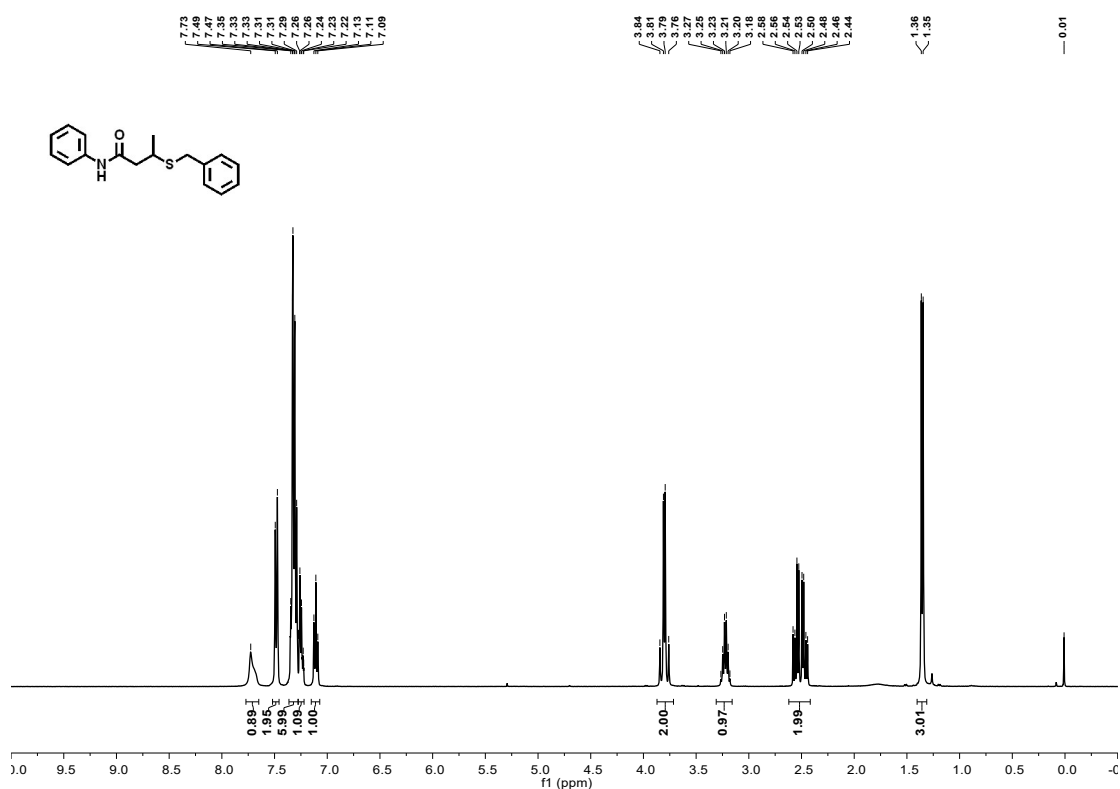

### <sup>13</sup>C NMR spectra of 3c

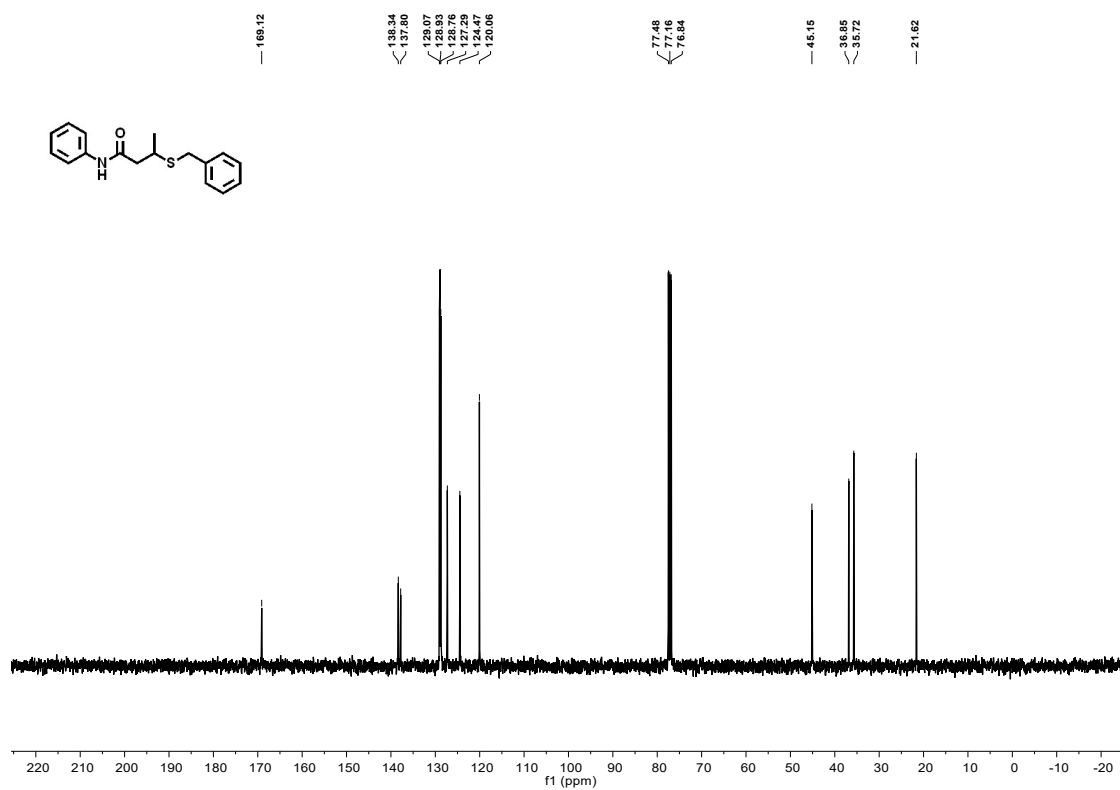

### <sup>1</sup>H NMR spectra of 3d

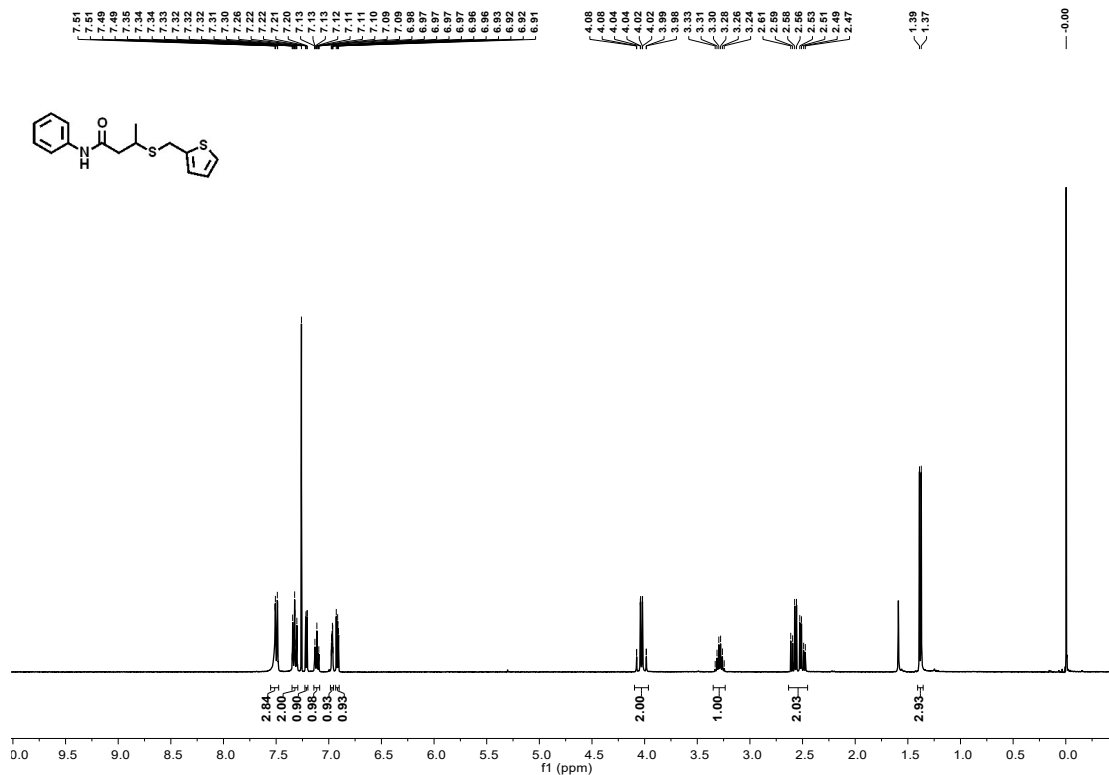

<sup>13</sup>C NMR spectra of 3d

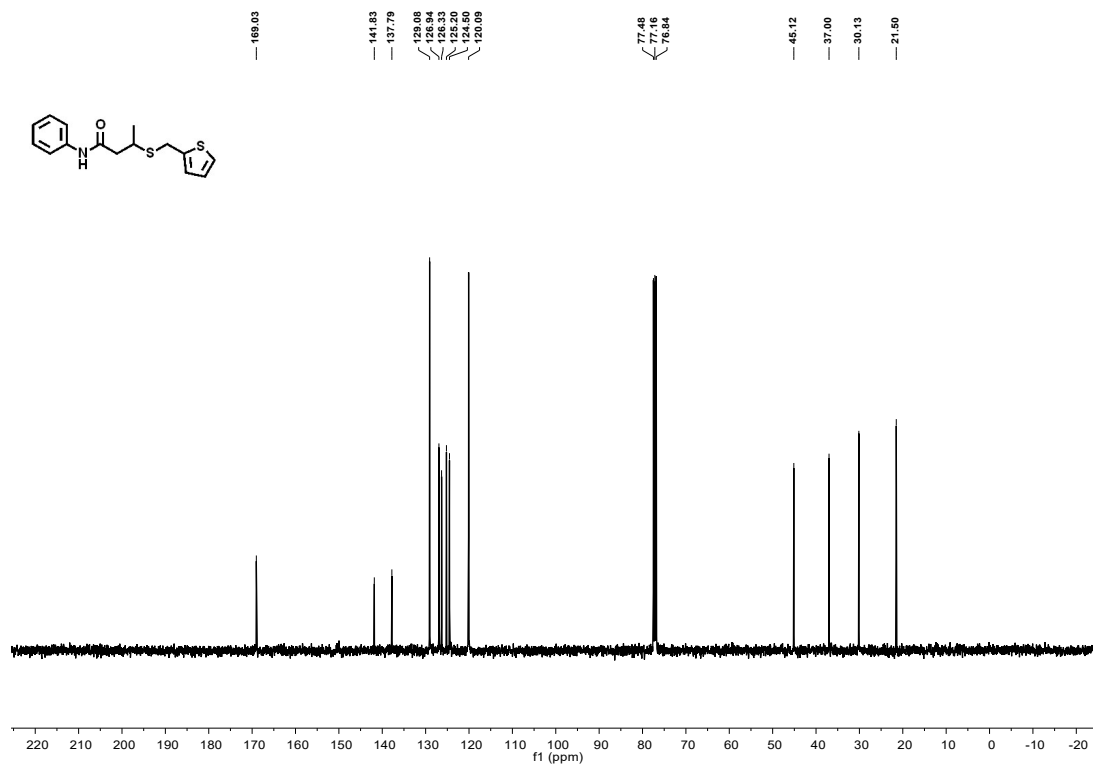

<sup>13</sup>C NMR spectra of 3e



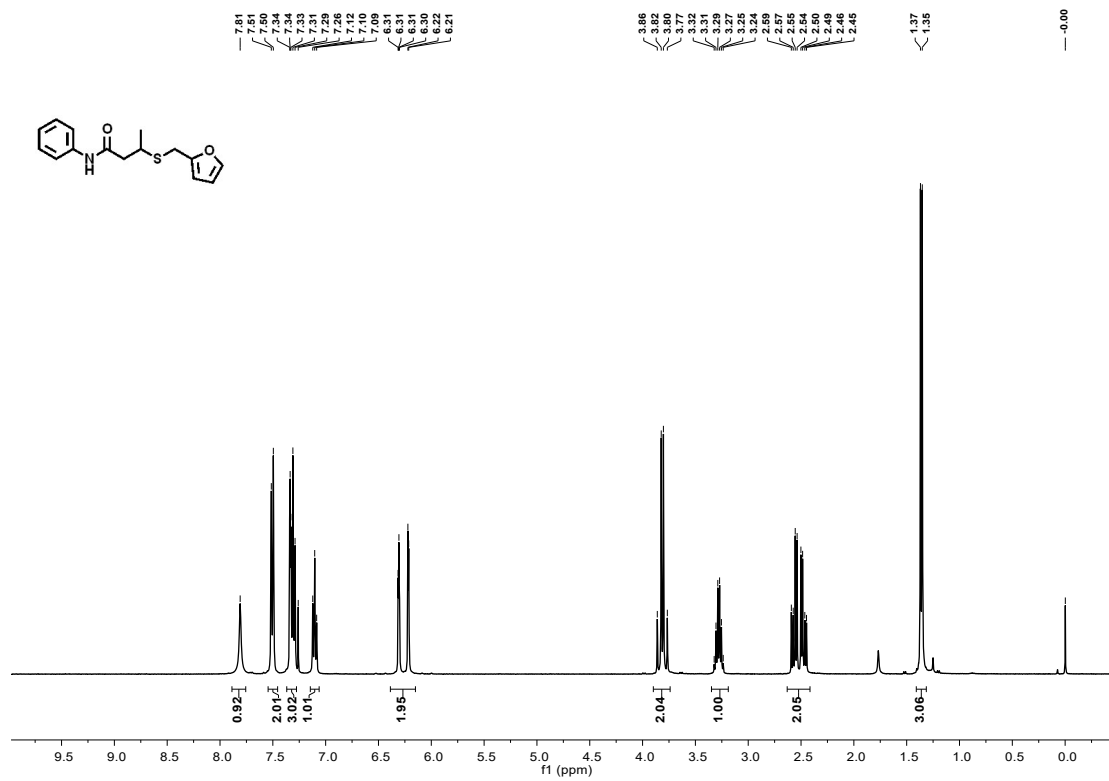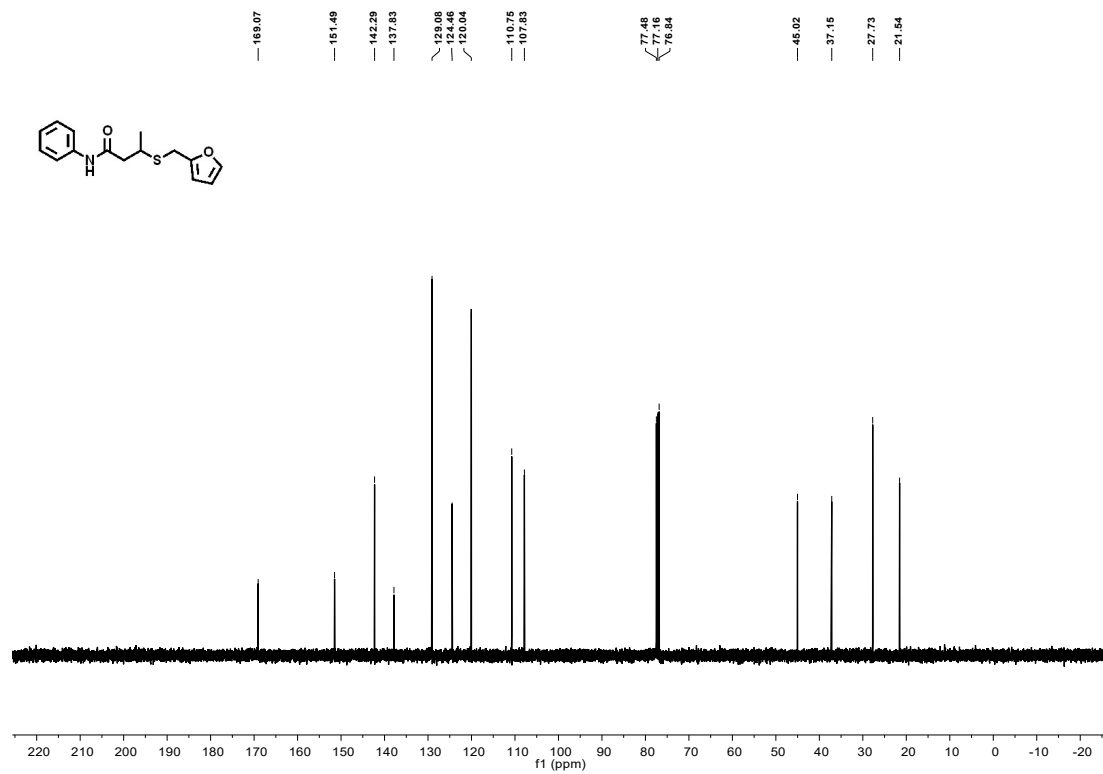

<sup>1</sup>H NMR spectra of 3f

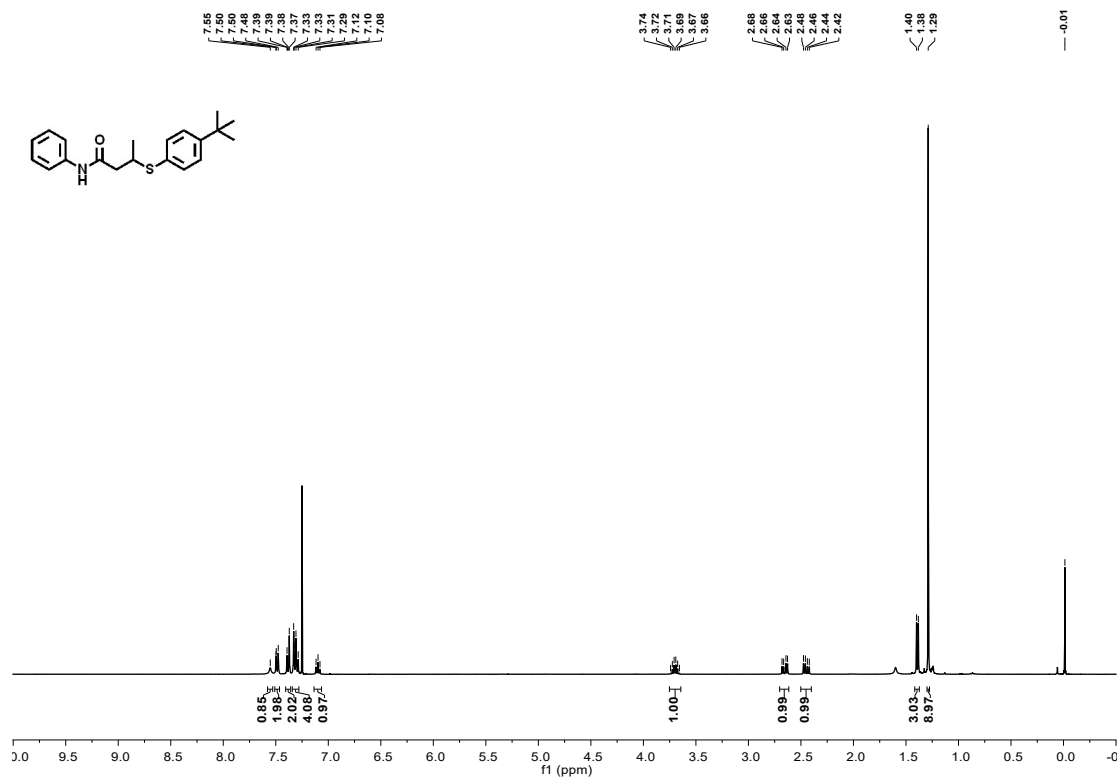

<sup>13</sup>C NMR spectra of 3f

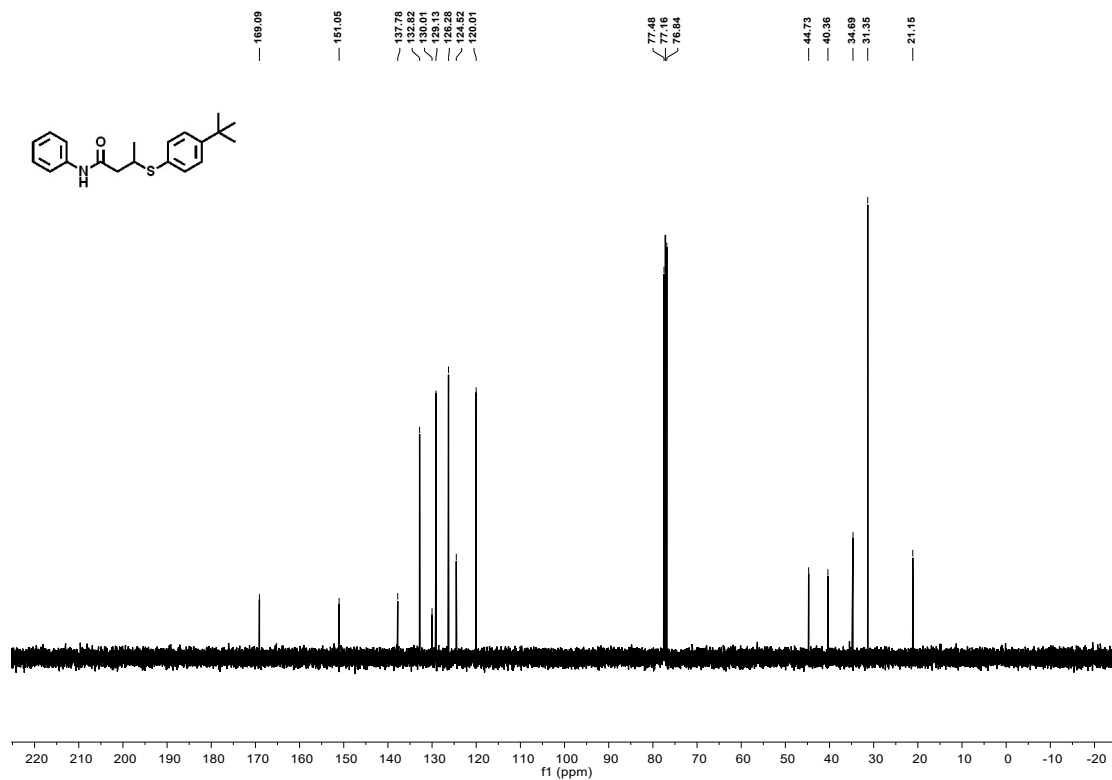

<sup>1</sup>H NMR spectra of 3g

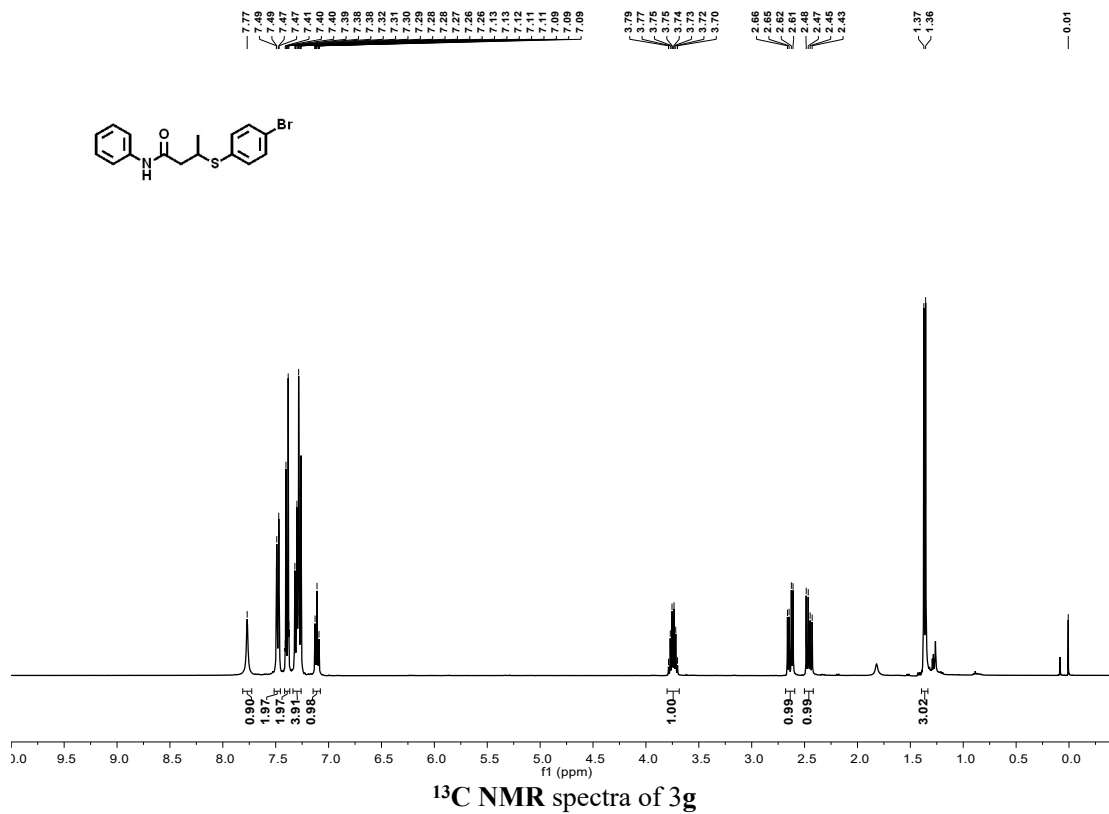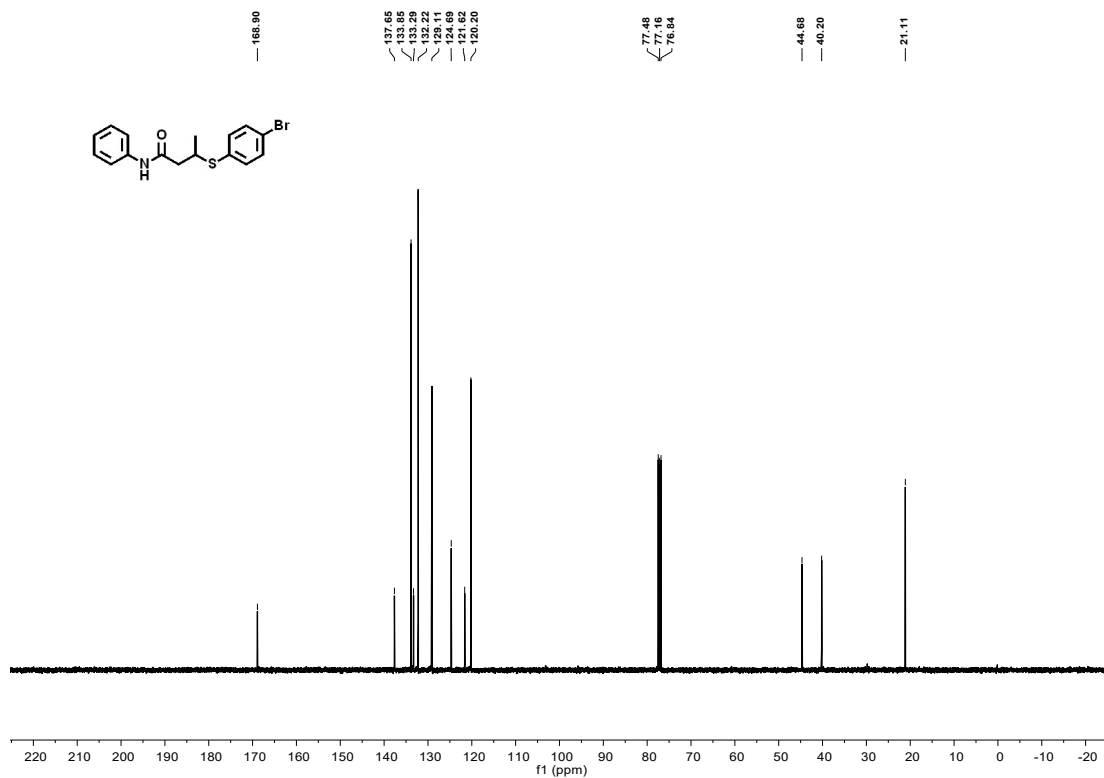

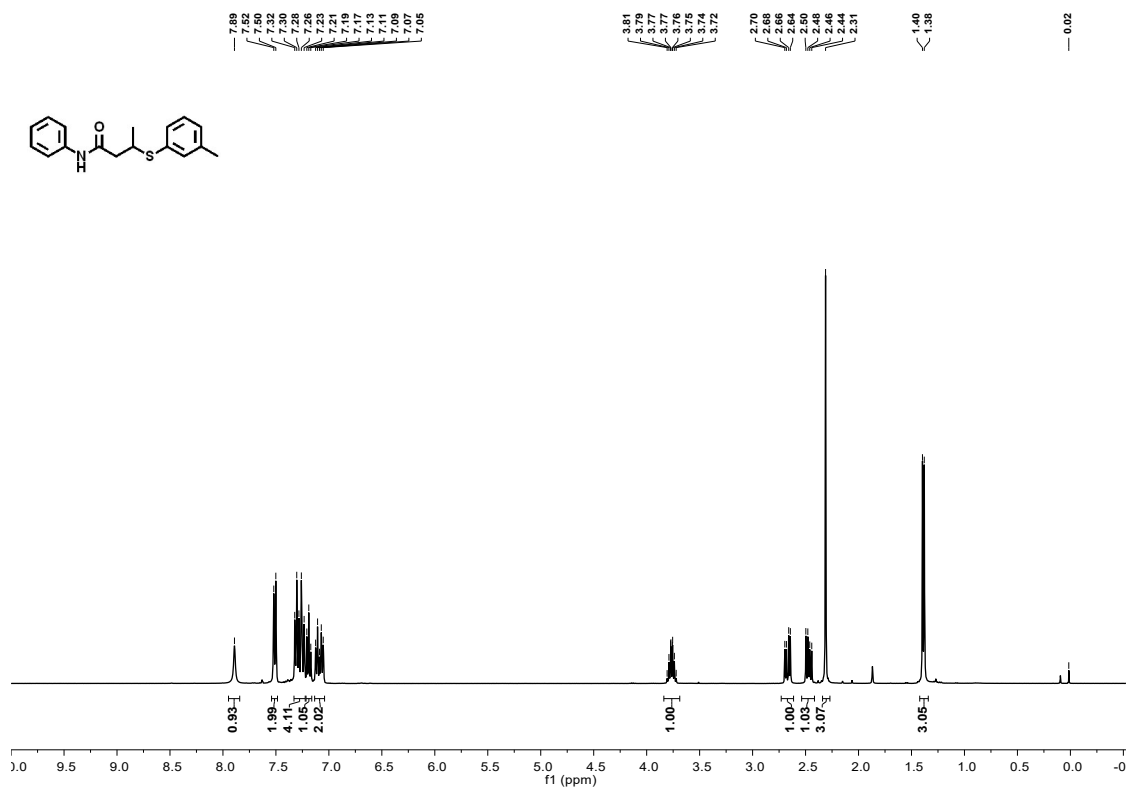

**<sup>13</sup>C NMR spectra of 3h**

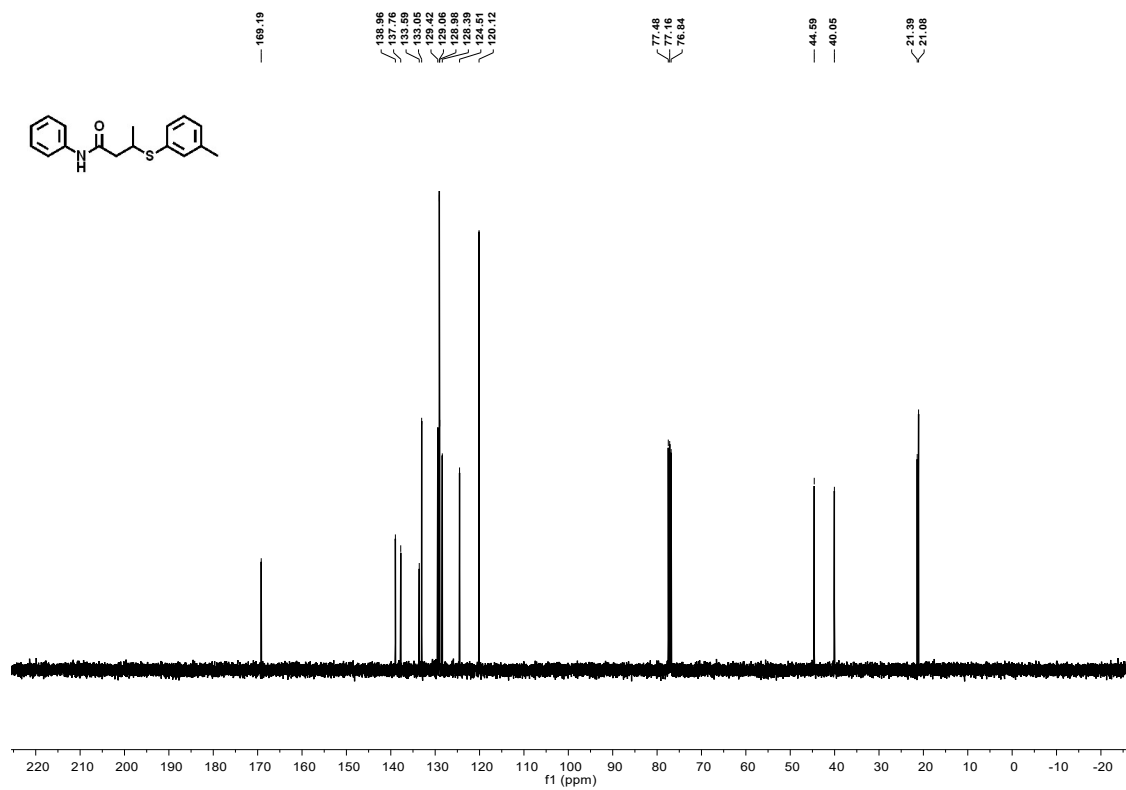

**<sup>1</sup>H NMR spectra of 3i**

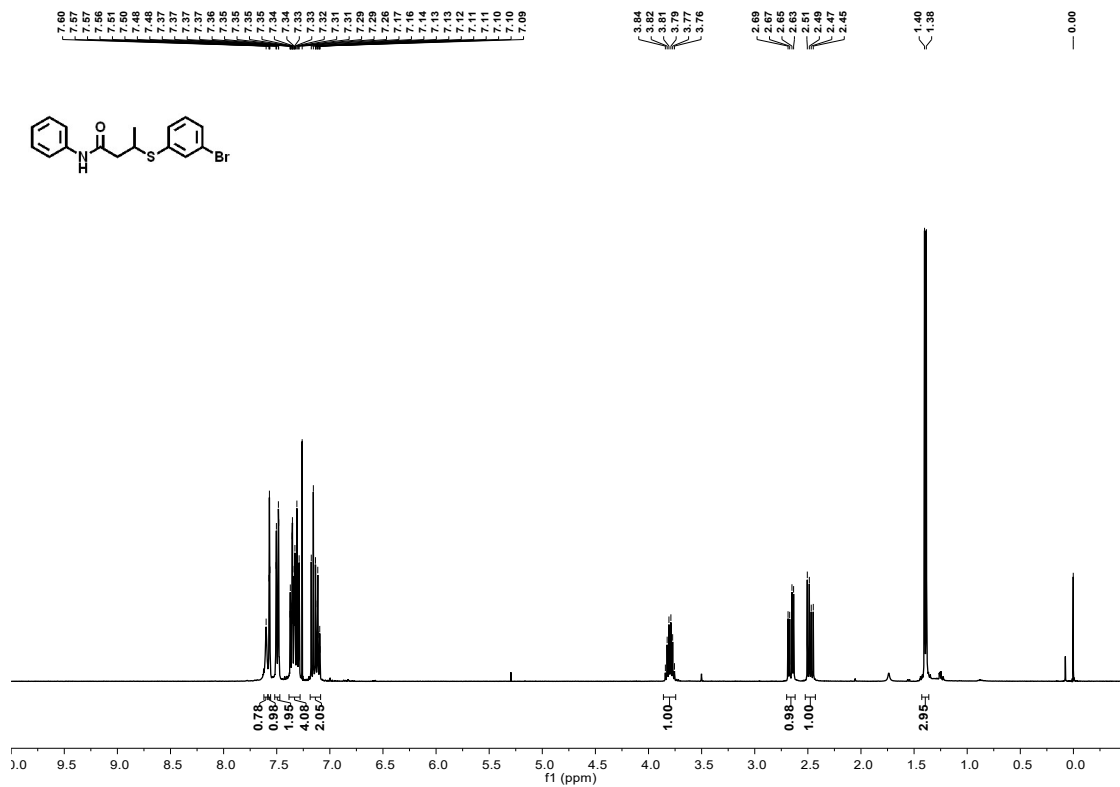

**<sup>13</sup>C NMR spectra of 3i**

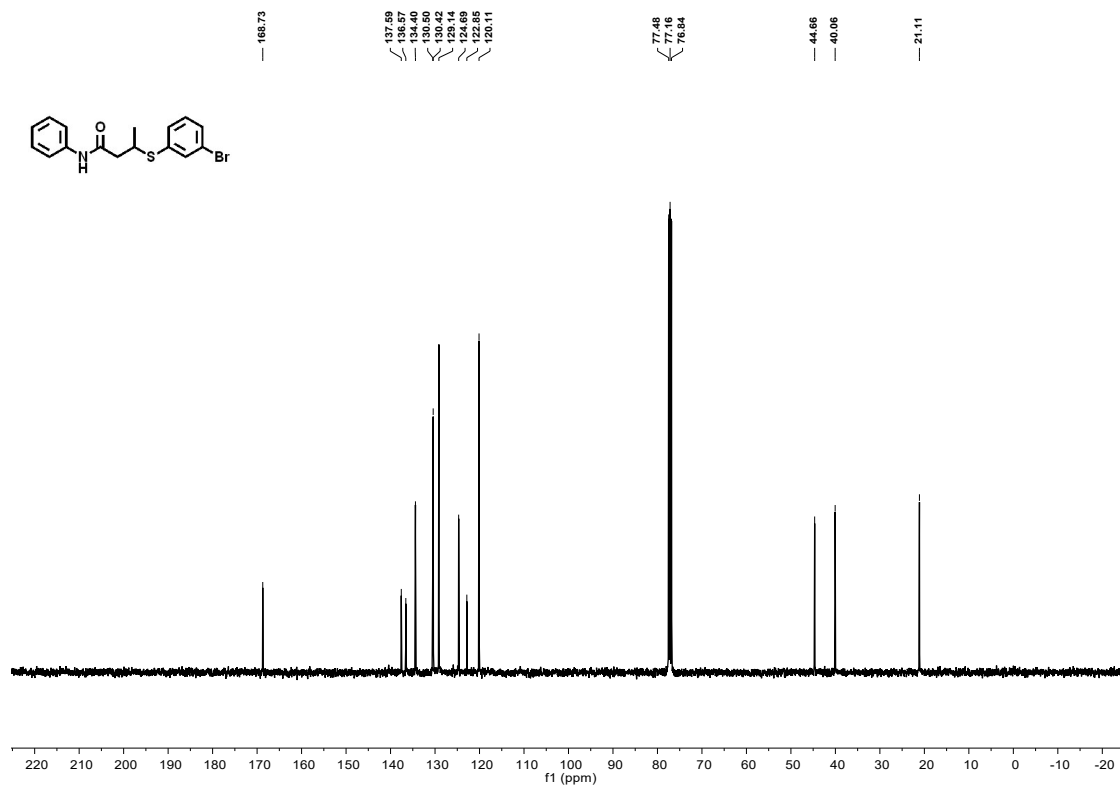

**<sup>1</sup>H NMR spectra of 3j**

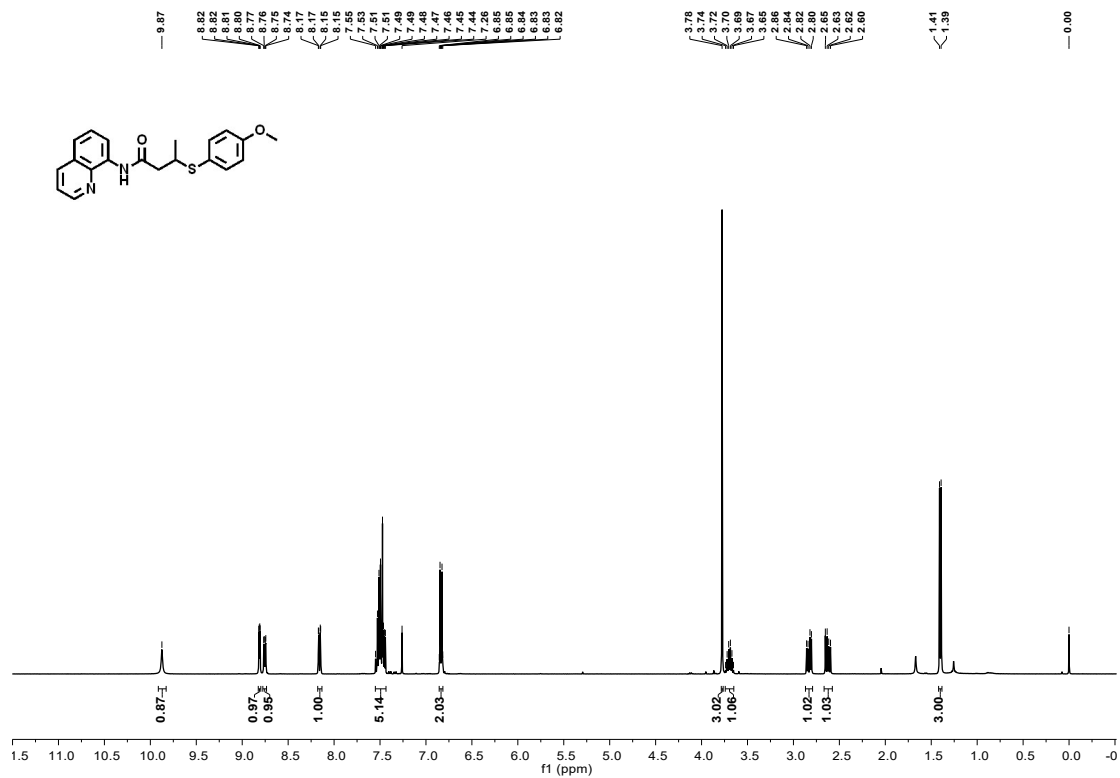

<sup>1</sup>H NMR spectra of **3j**

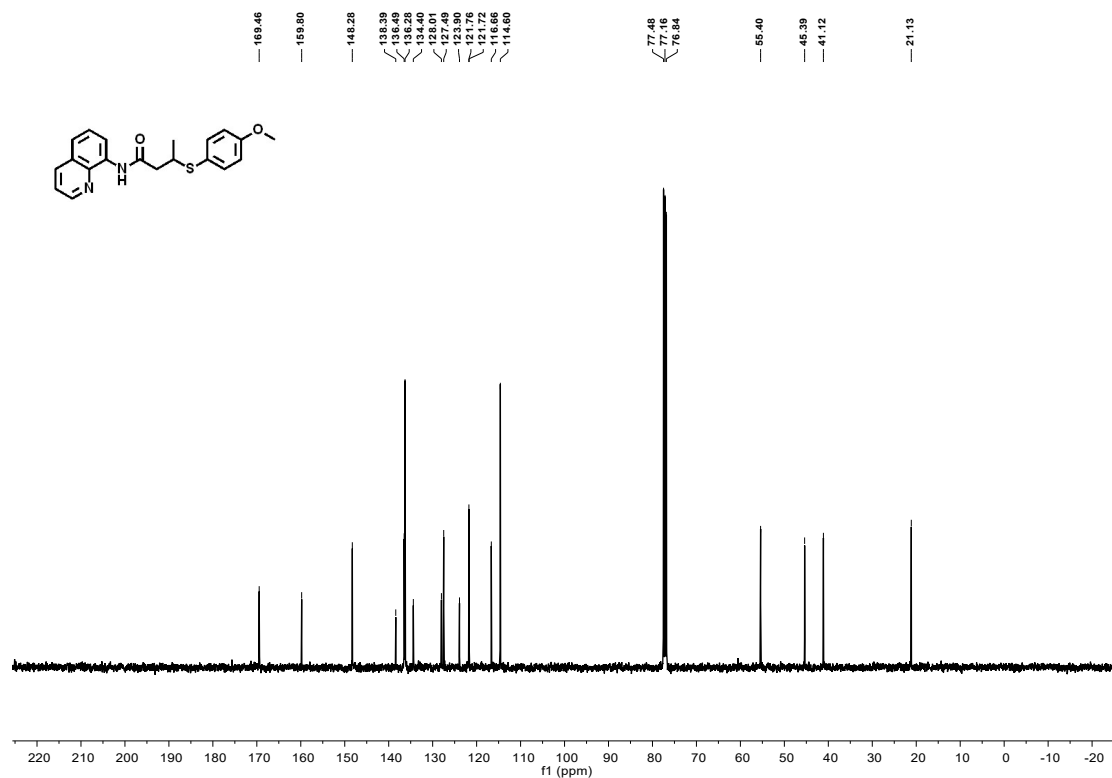

<sup>13</sup>C NMR spectra of **3k**

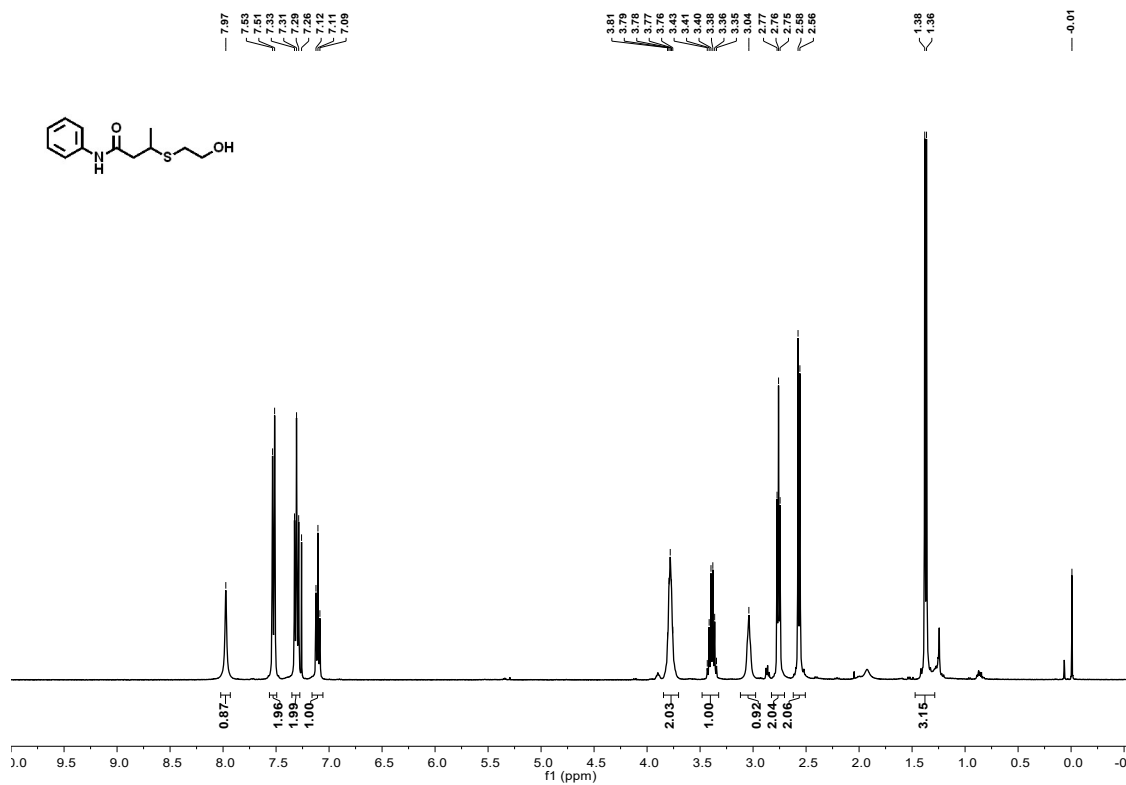

<sup>13</sup>C NMR spectra of 3k

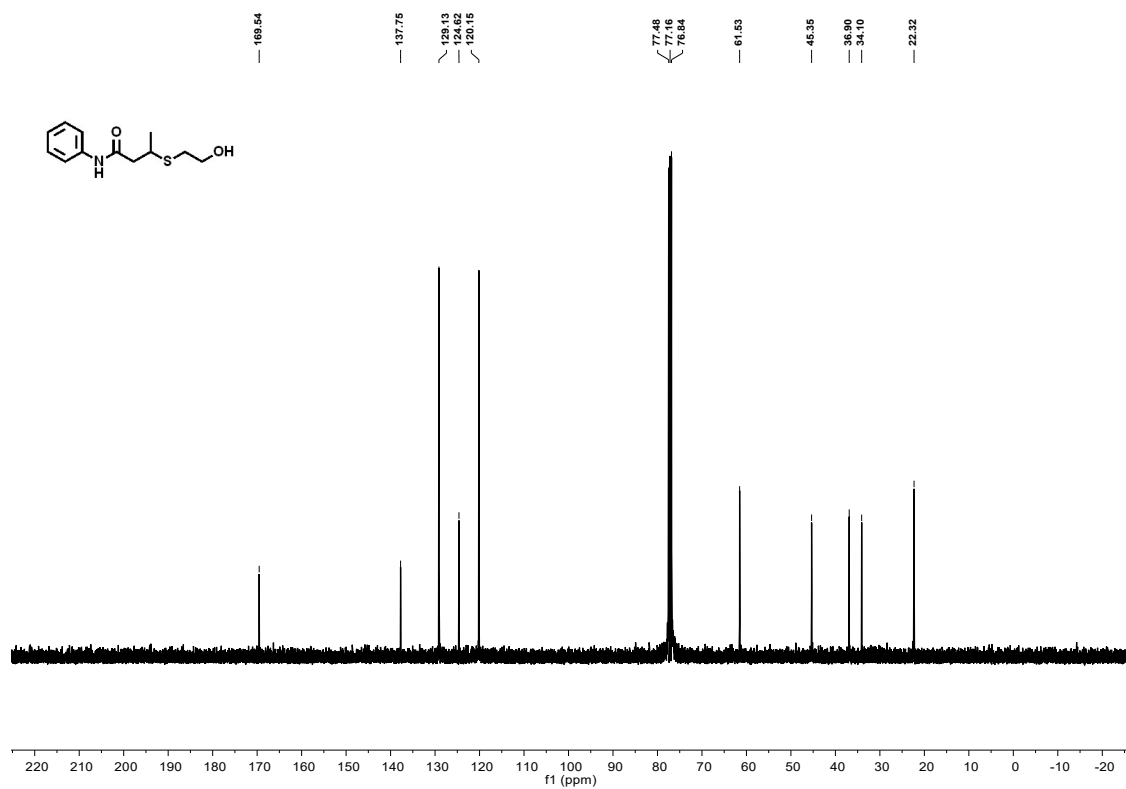

<sup>1</sup>H NMR spectra of 3l

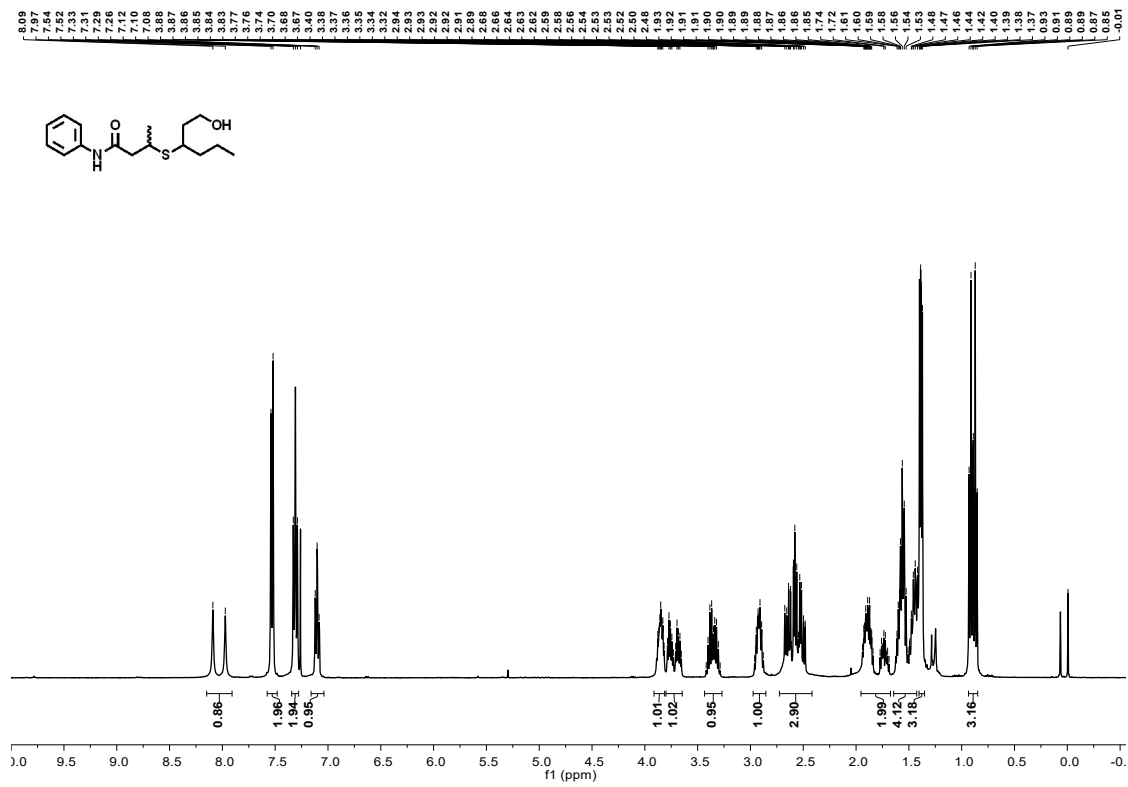

<sup>13</sup>C NMR spectra of 3l

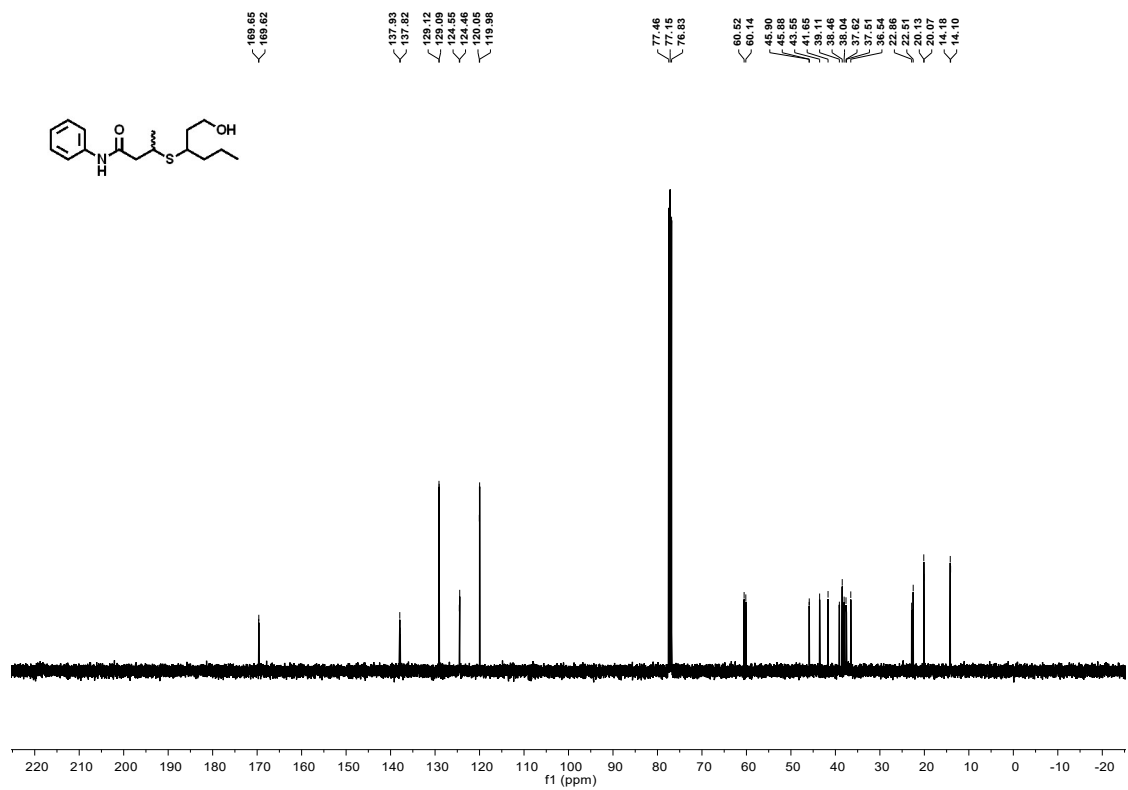

<sup>1</sup>H NMR spectra of 3m



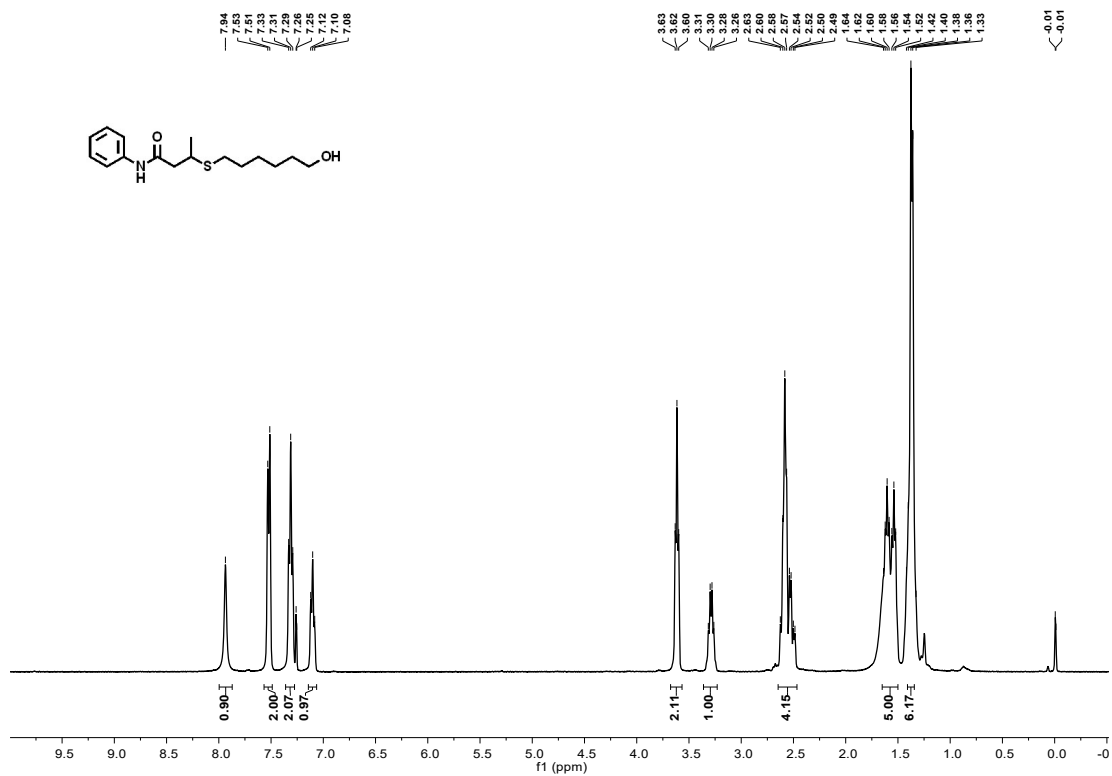

**<sup>13</sup>C NMR spectra of 3m**

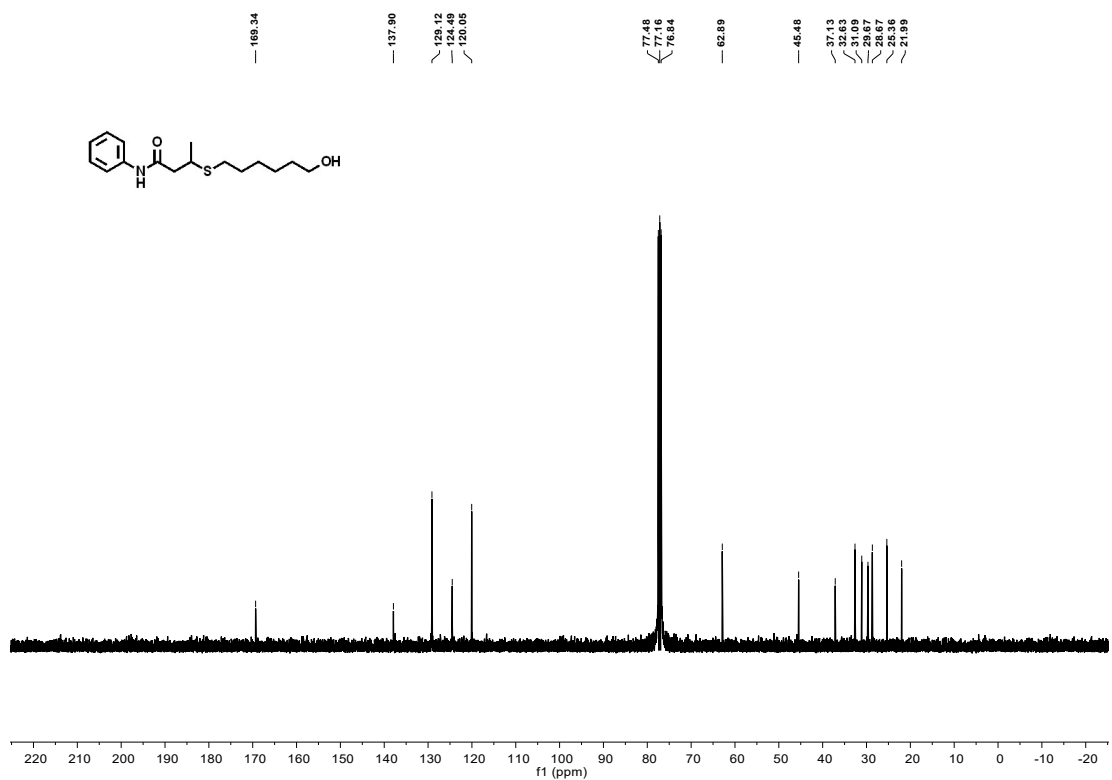

**<sup>1</sup>H NMR spectra of 3n**

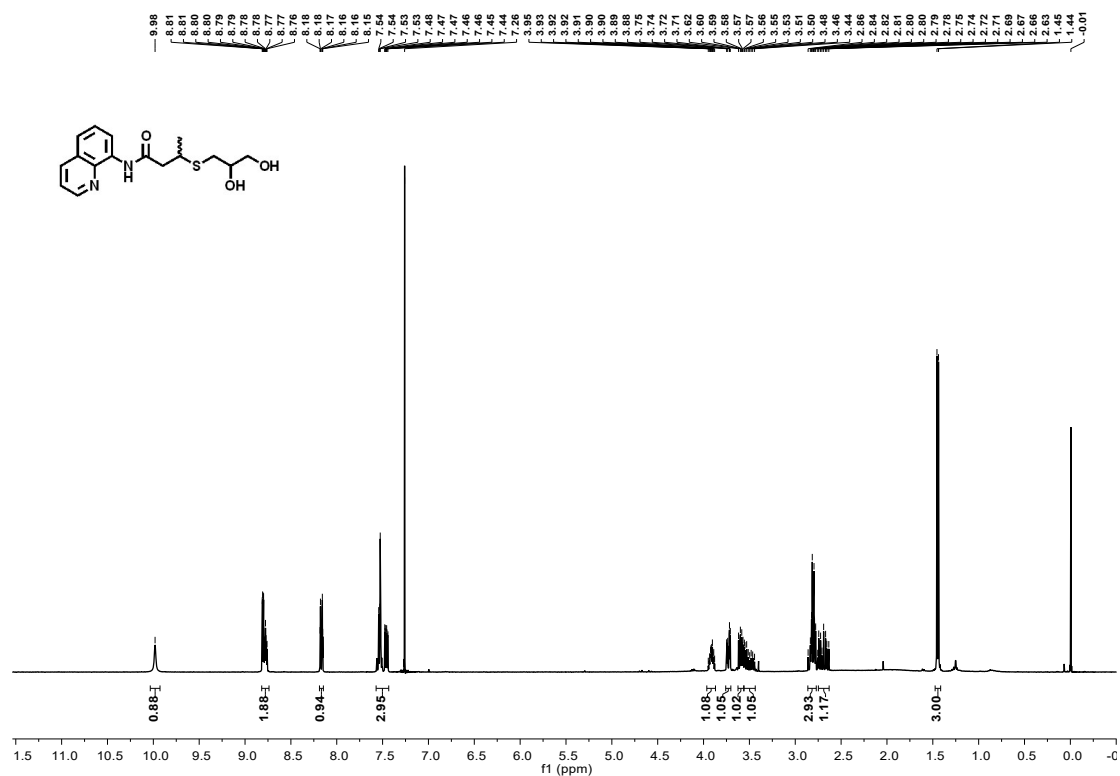

<sup>13</sup>C NMR spectra of 3n

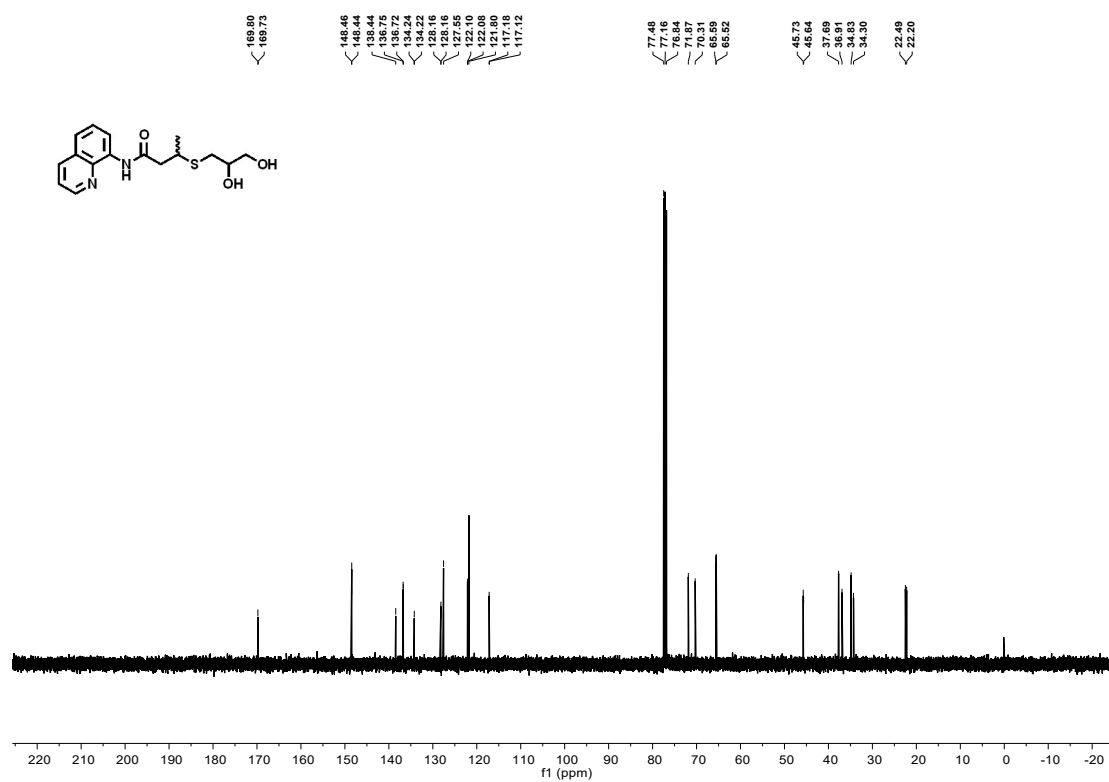

### <sup>1</sup>H NMR spectra of 30

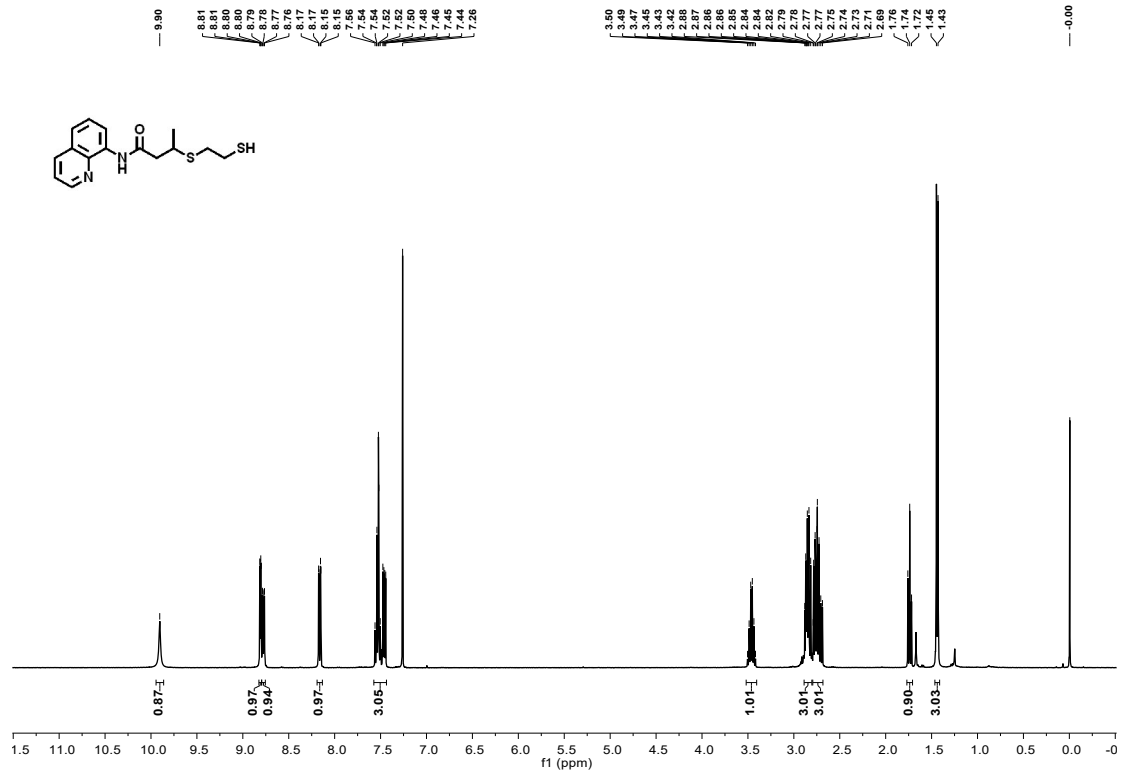

### <sup>13</sup>C NMR spectra of 30

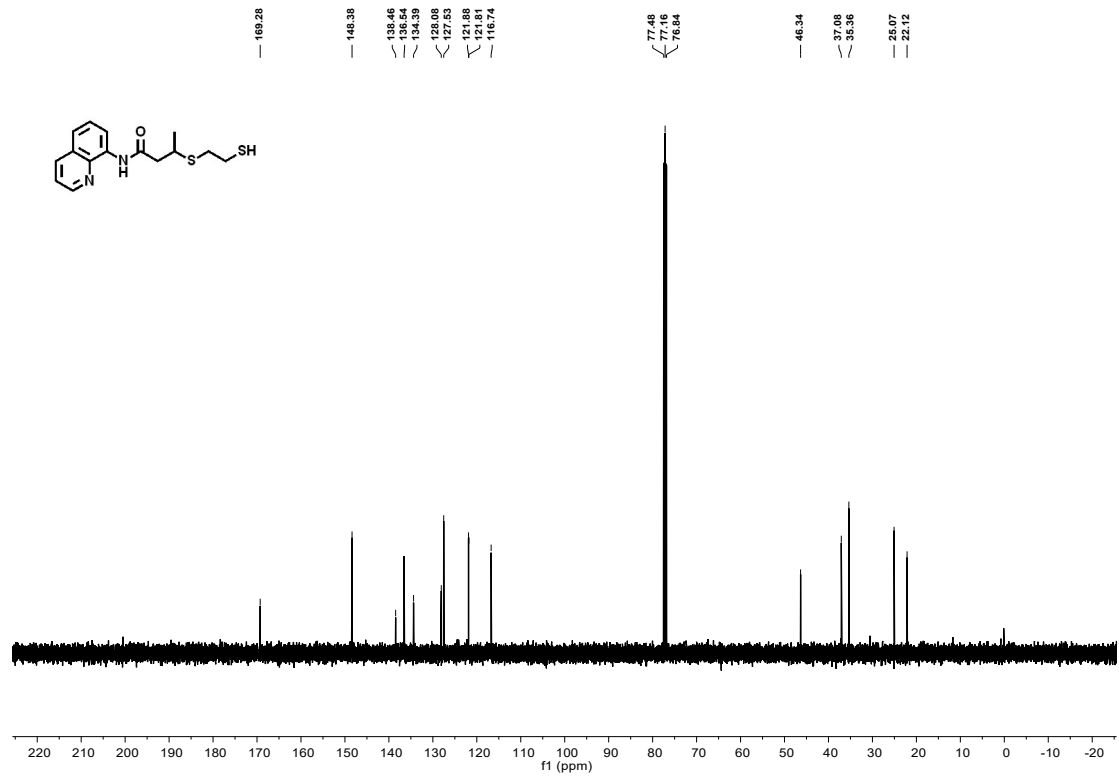

### <sup>1</sup>H NMR spectra of 3p

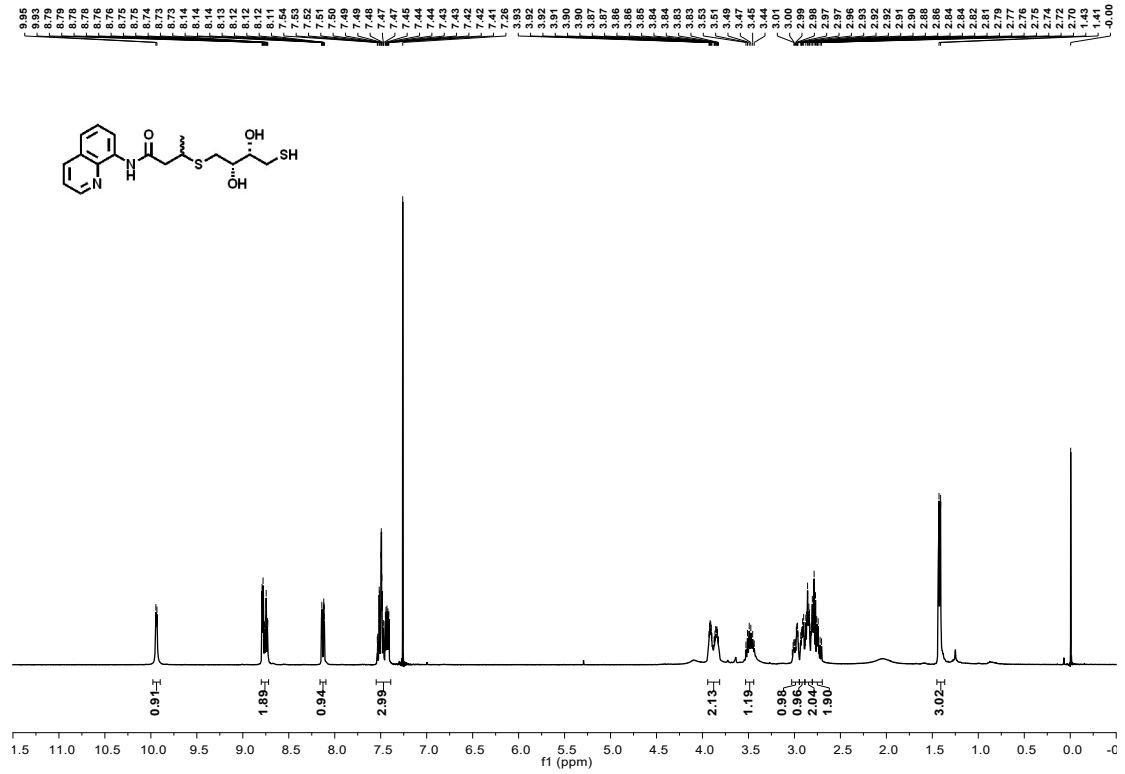

### <sup>13</sup>C NMR spectra of 3p

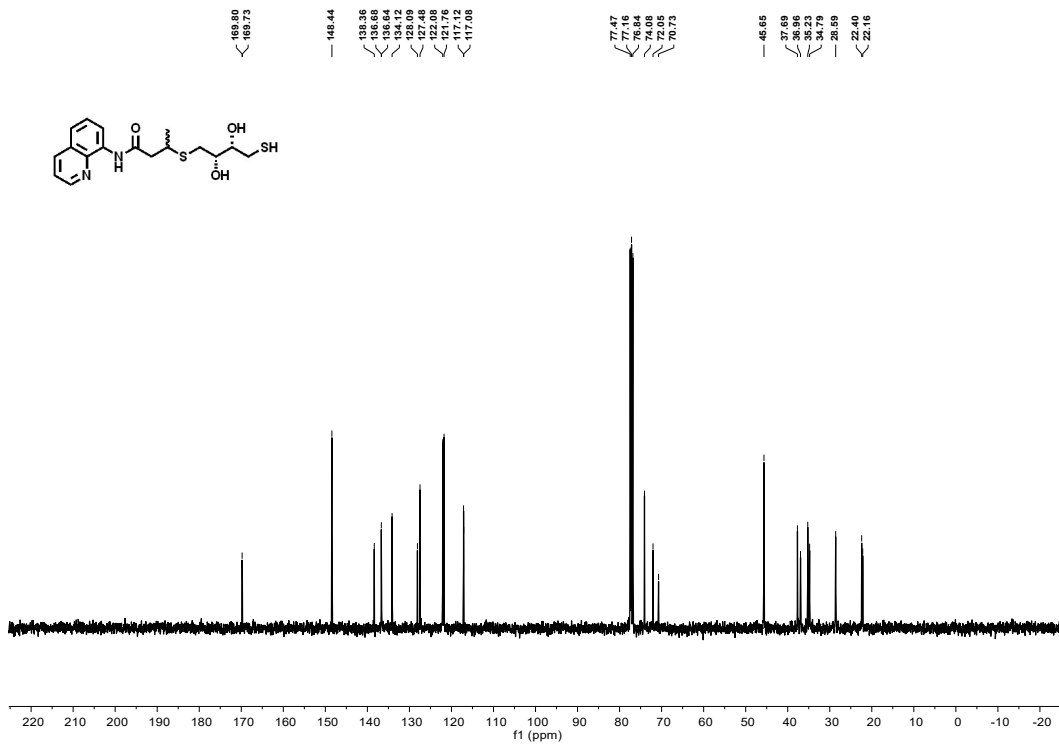

### <sup>1</sup>H NMR spectra of 4a

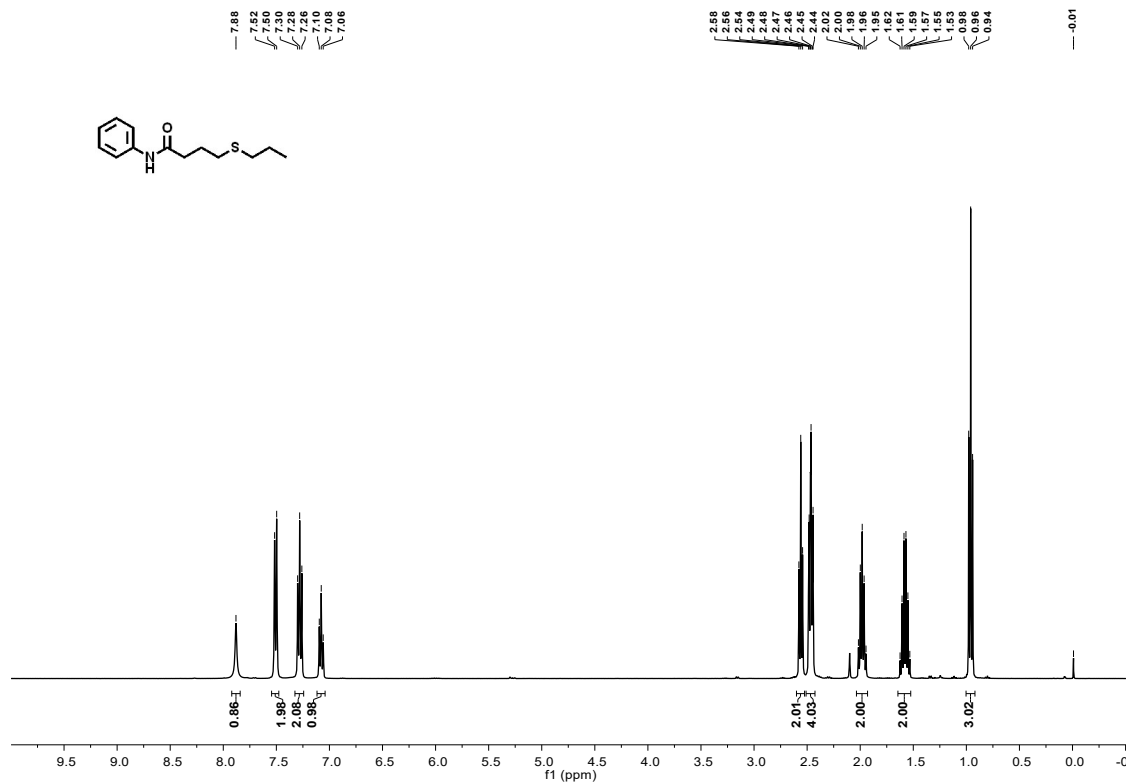

**<sup>13</sup>C NMR spectra of 4a**

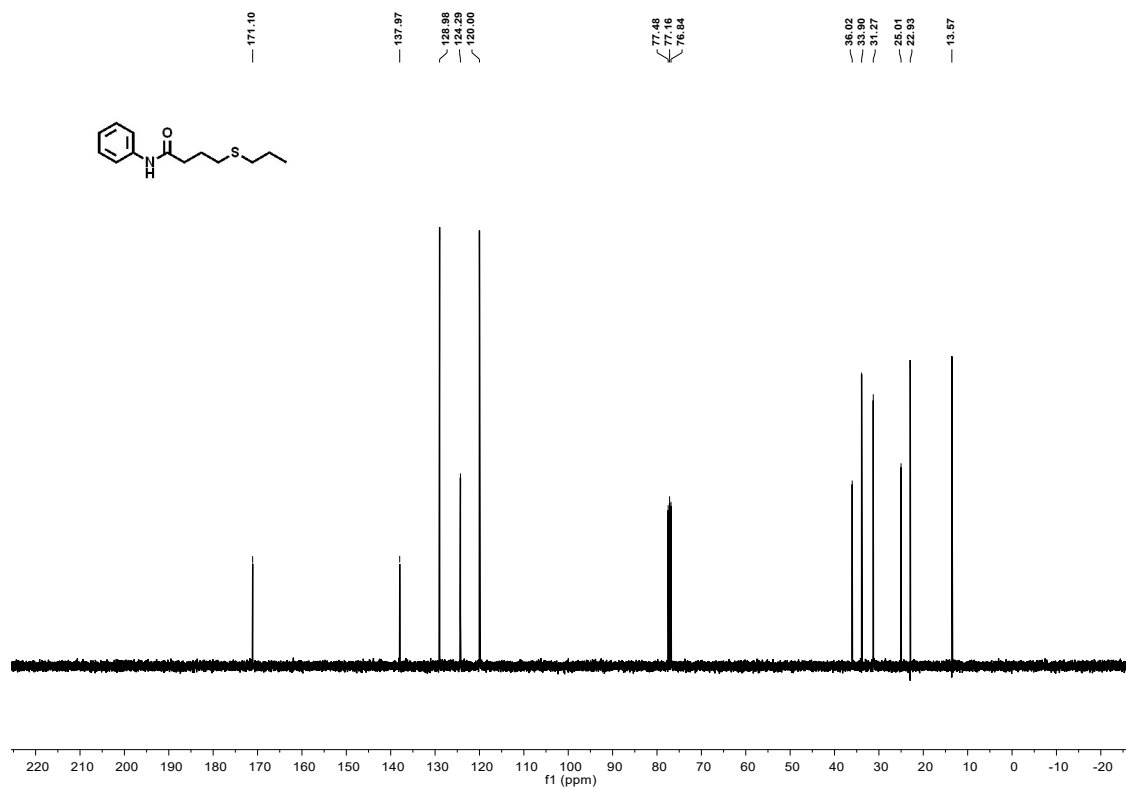

**<sup>1</sup>H NMR spectra of 4b**

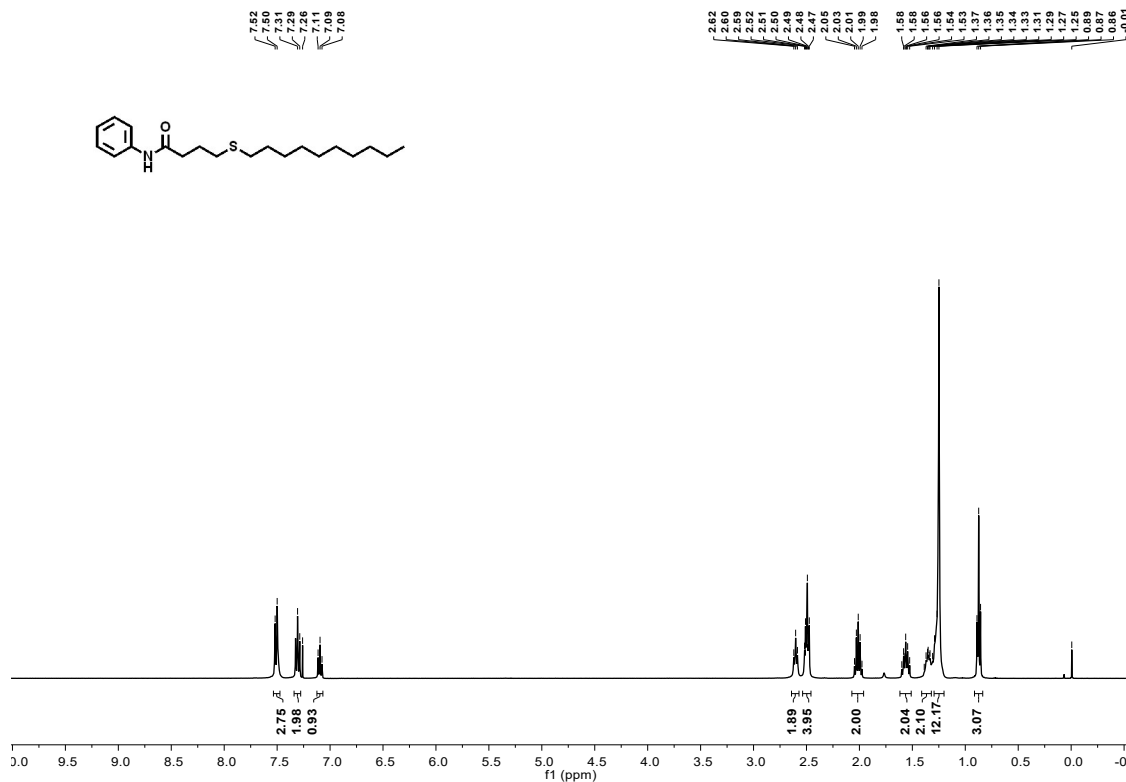

**<sup>13</sup>C NMR spectra of 4b**

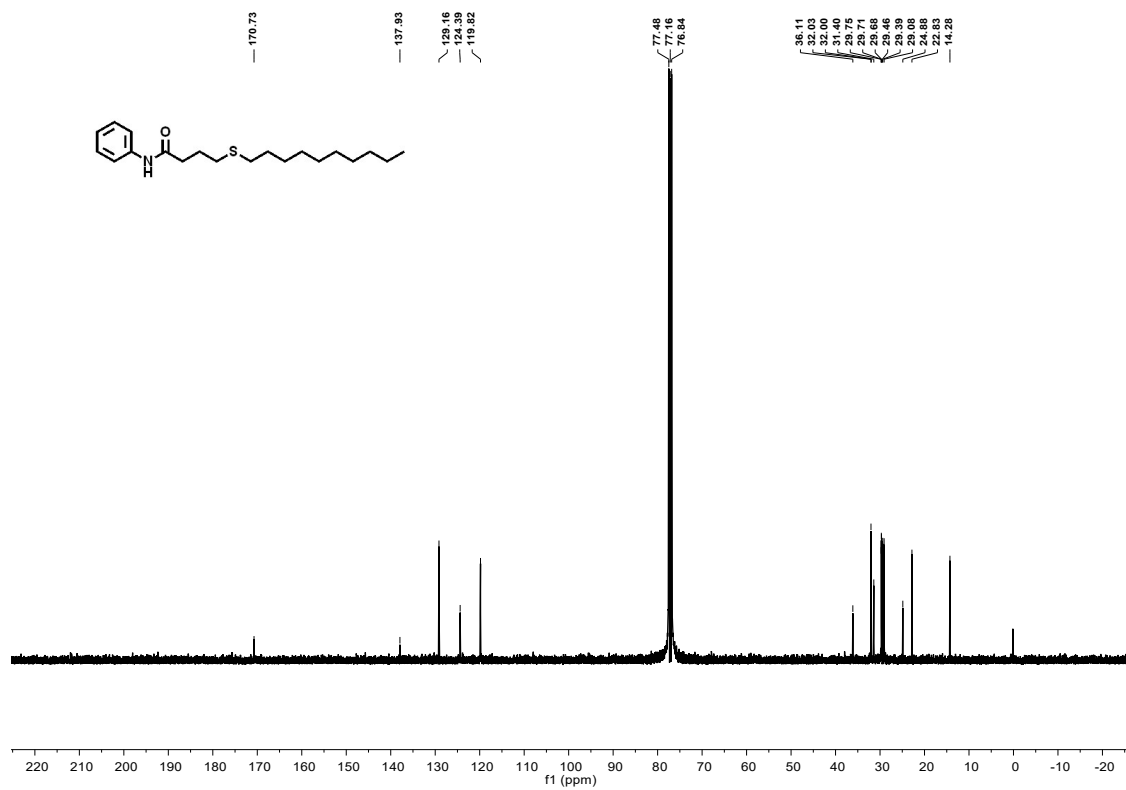

**<sup>1</sup>H NMR spectra of 4c**

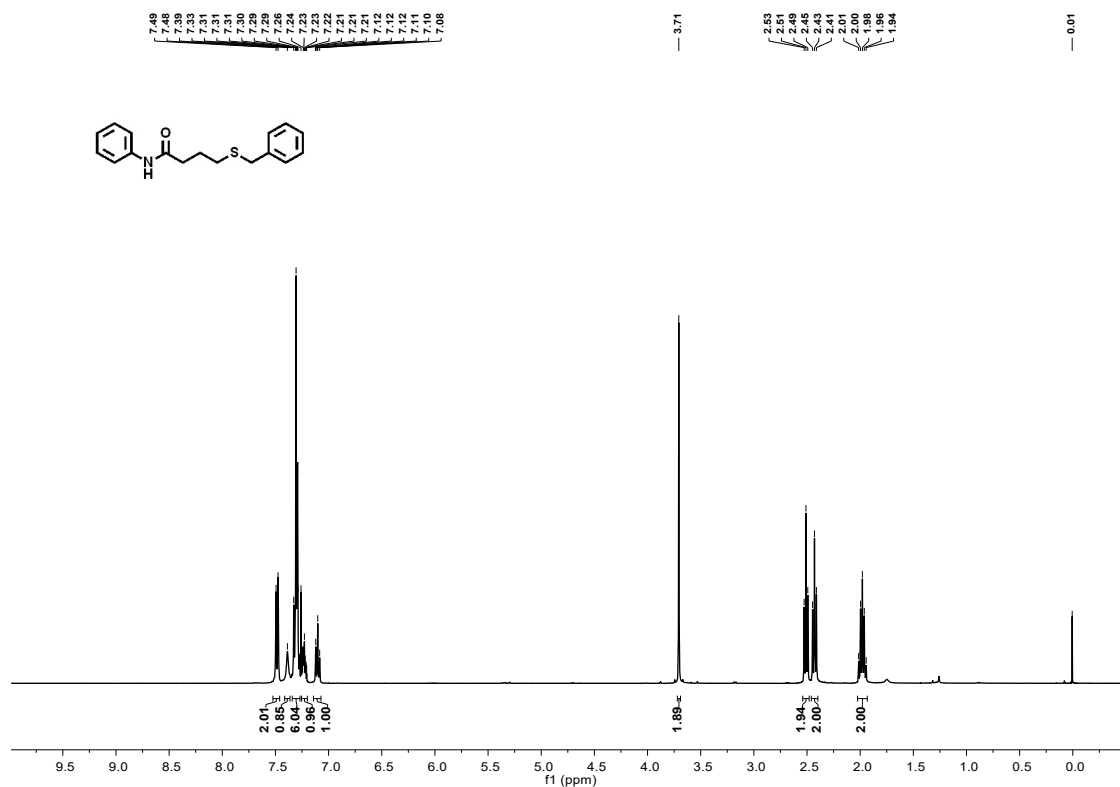

**<sup>13</sup>C NMR spectra of 4c**

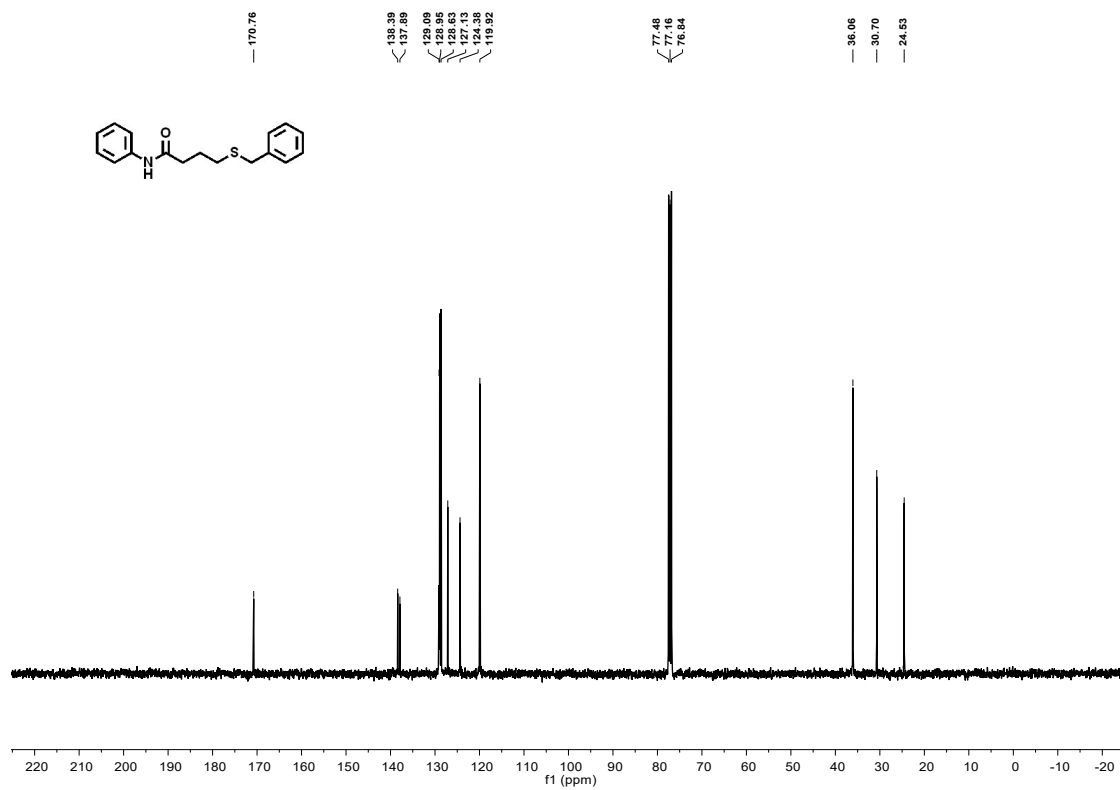

**<sup>1</sup>H NMR spectra of 4d**

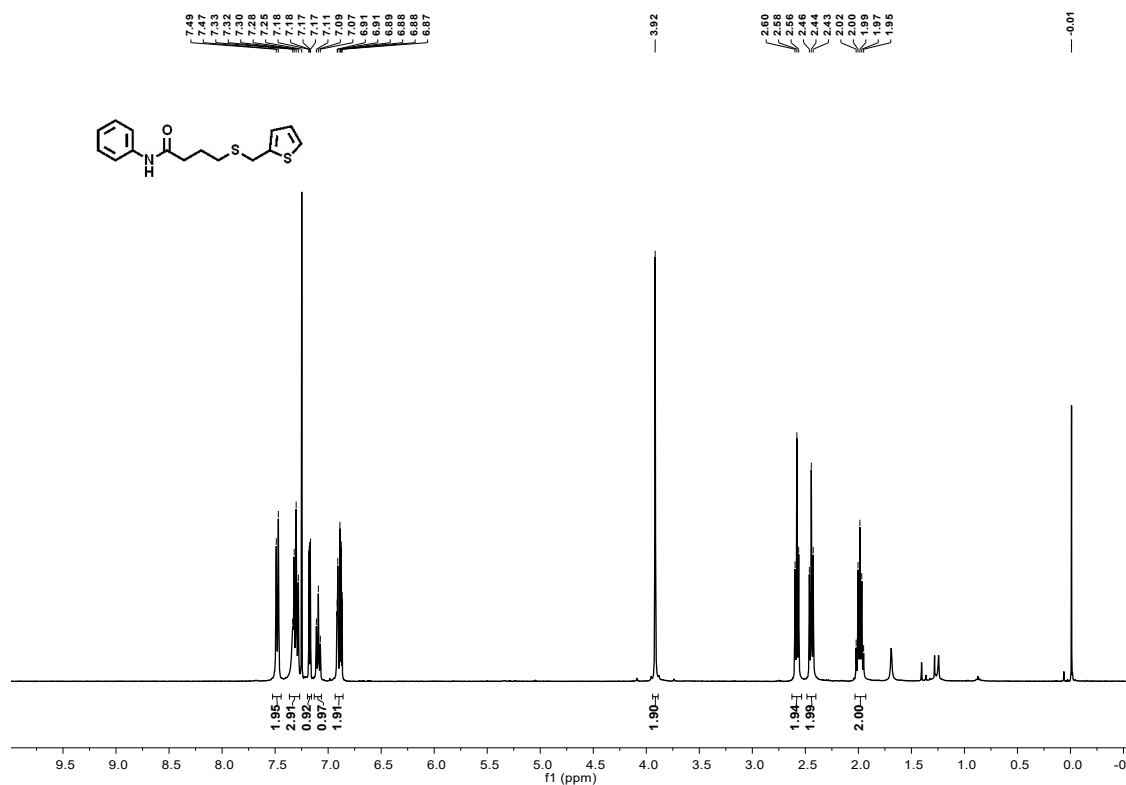

<sup>13</sup>C NMR spectra of 4d

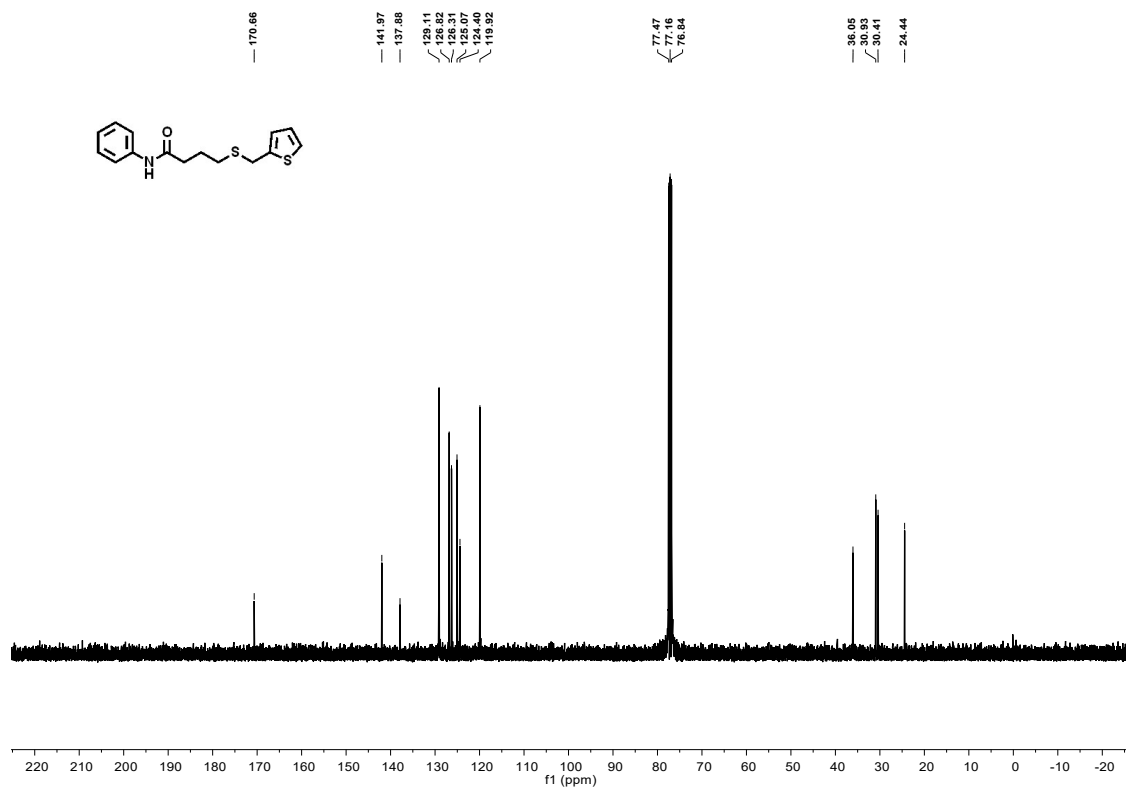

<sup>1</sup>H NMR spectra of 4e



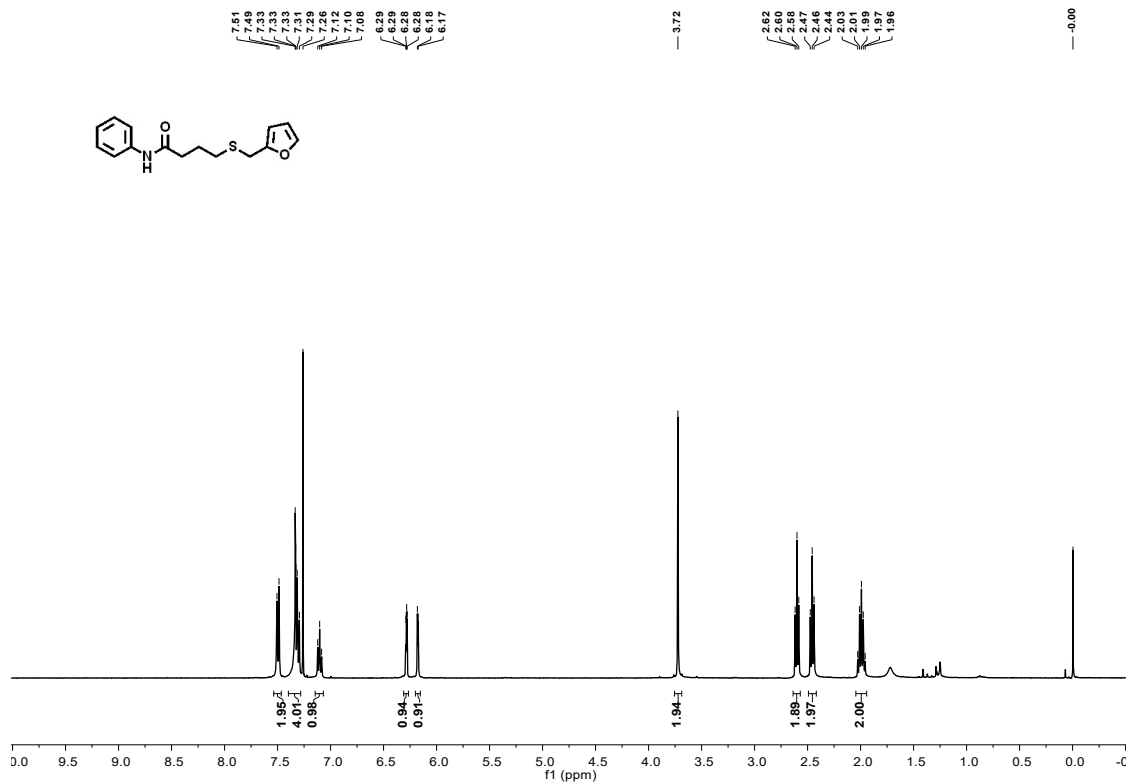

**<sup>13</sup>C NMR spectra of 4e**

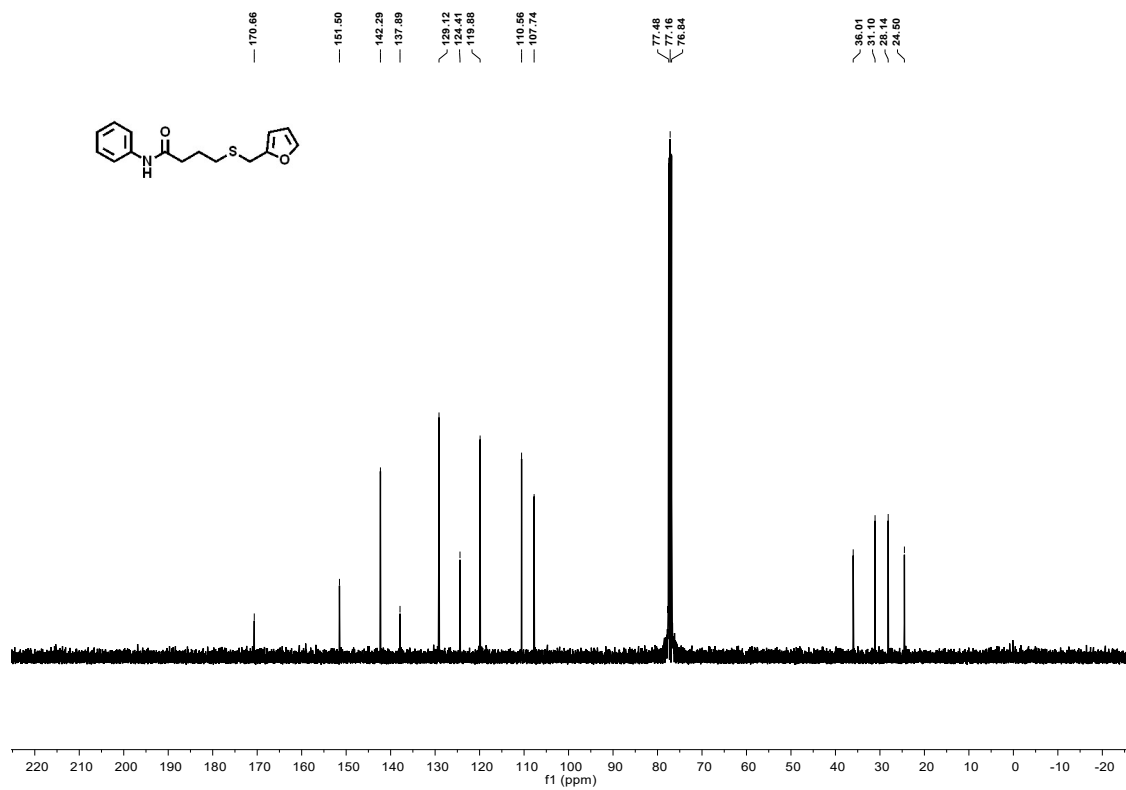

**<sup>1</sup>H NMR spectra of 4f**

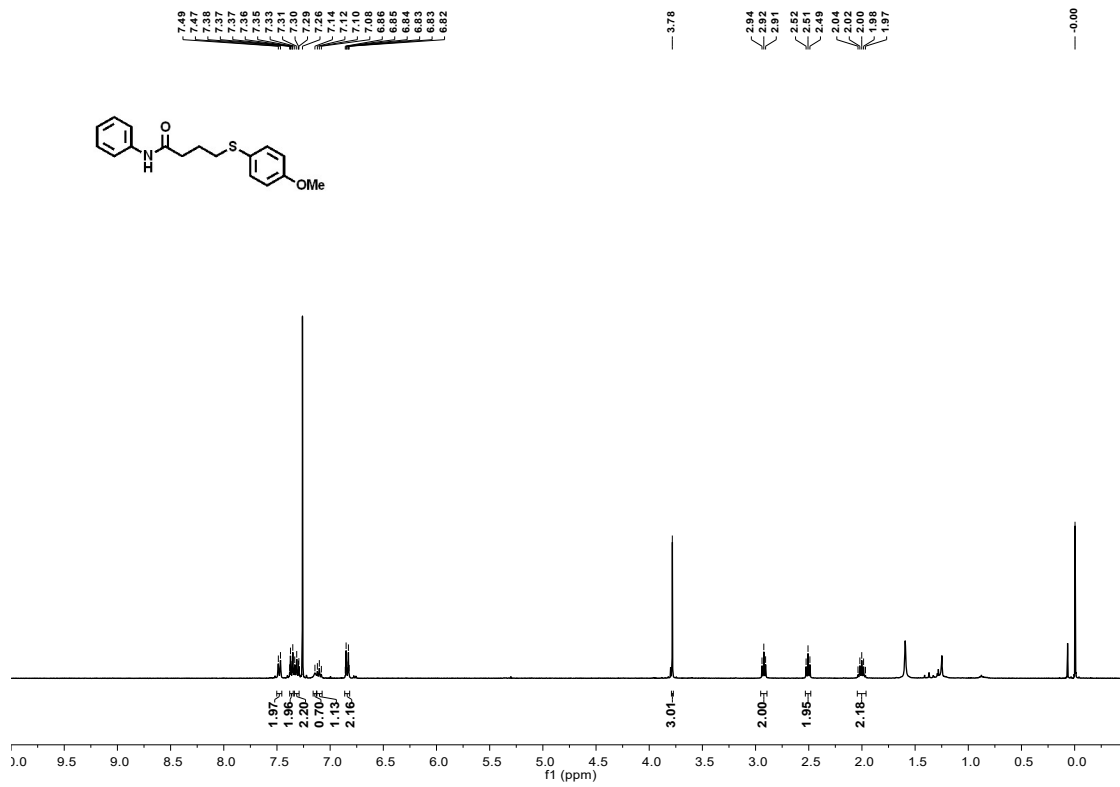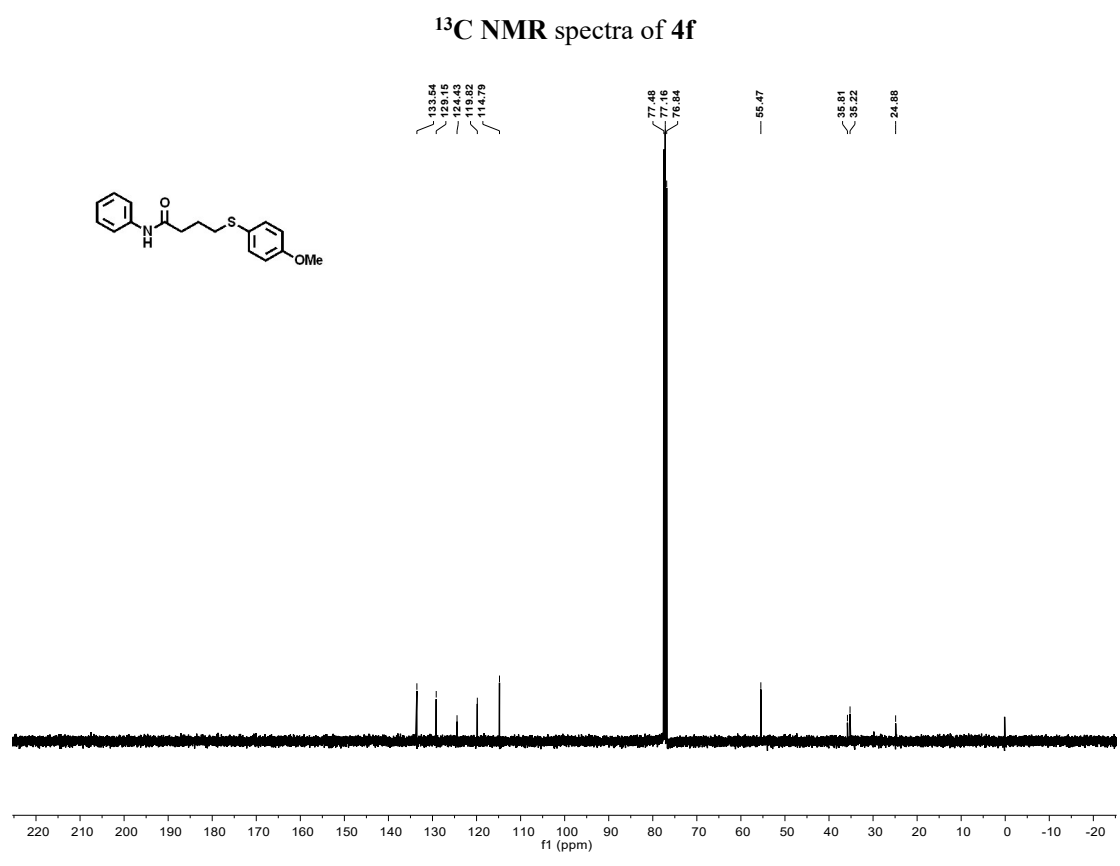

**<sup>1</sup>H NMR spectra of 4g**

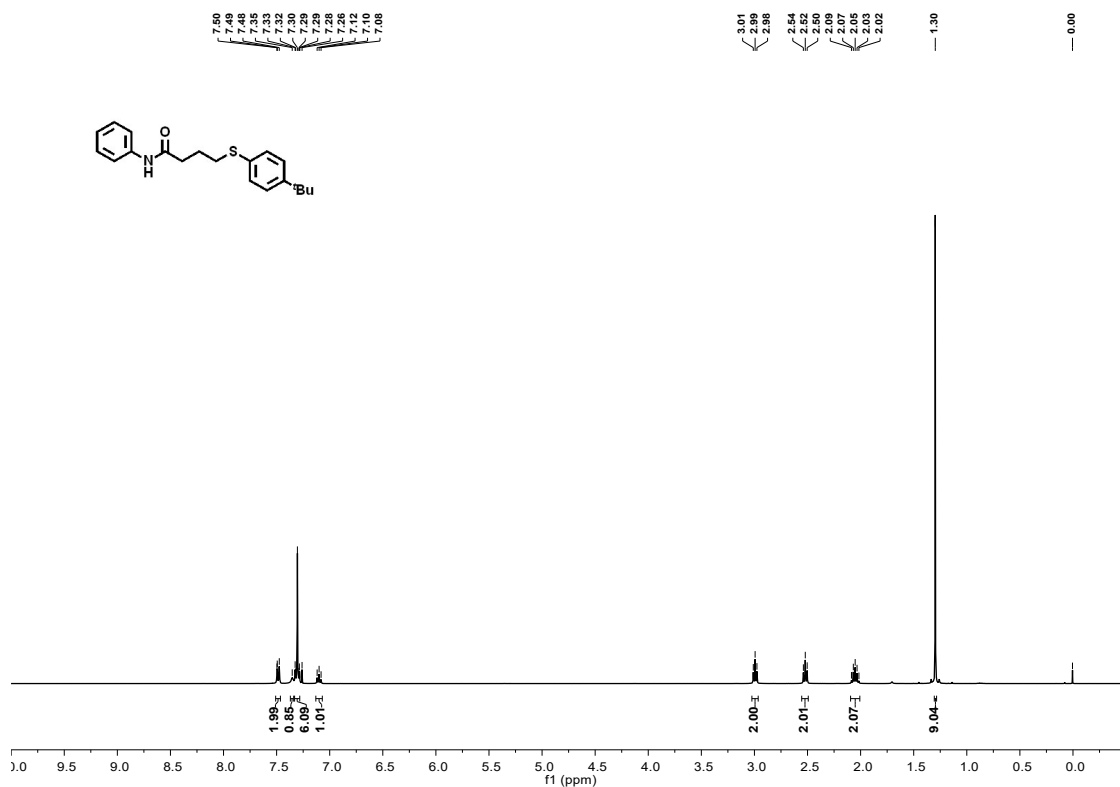

**<sup>13</sup>C NMR spectra of 4g**

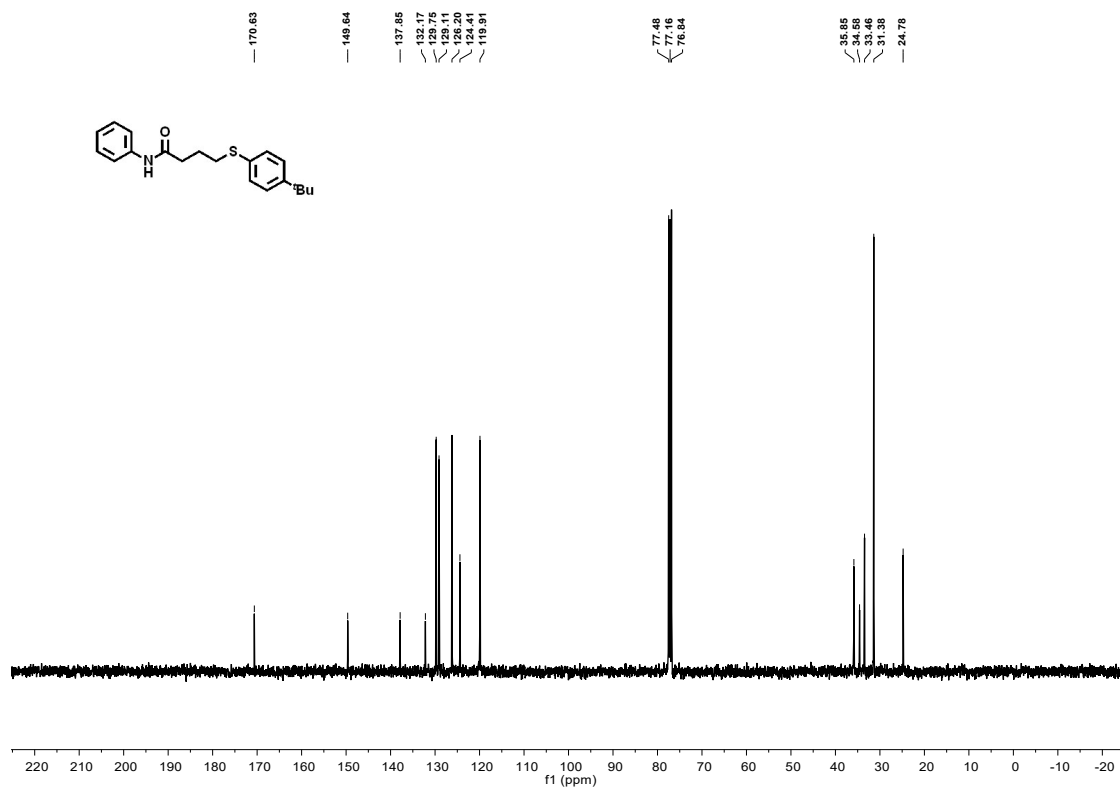

**<sup>1</sup>H NMR spectra of 4h**

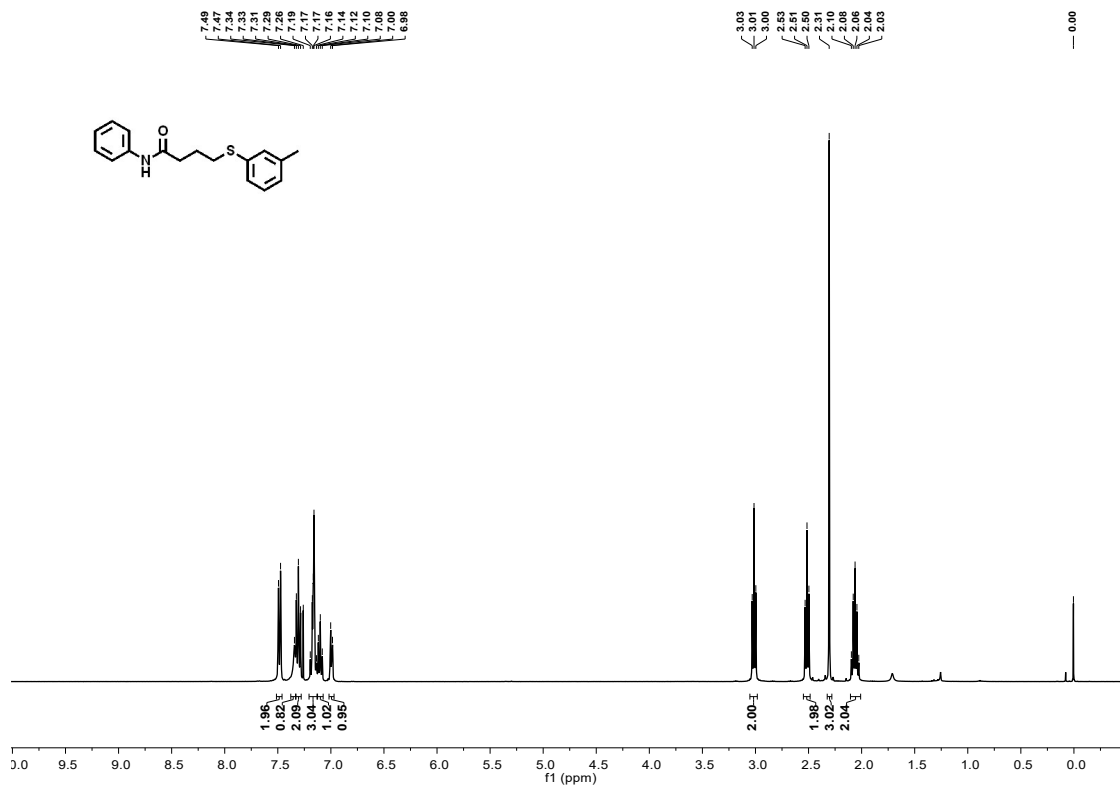

**<sup>13</sup>C NMR spectra of 4h**

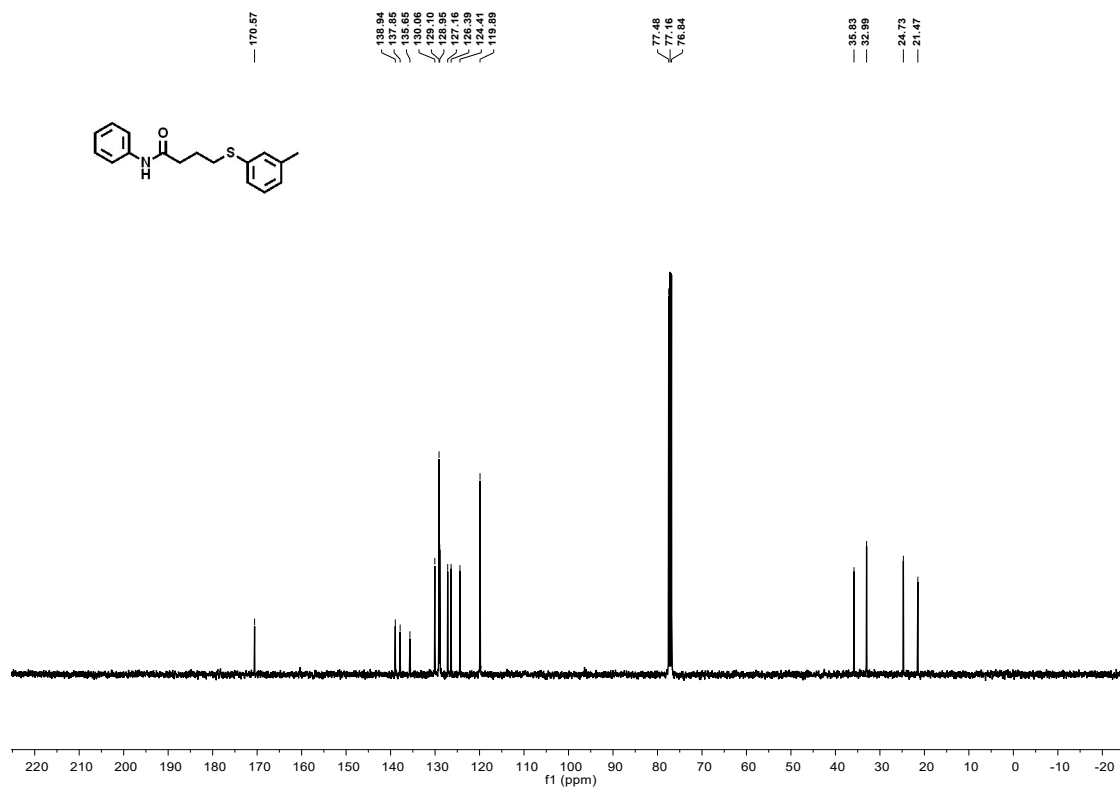

**<sup>1</sup>H NMR spectra of 4i**

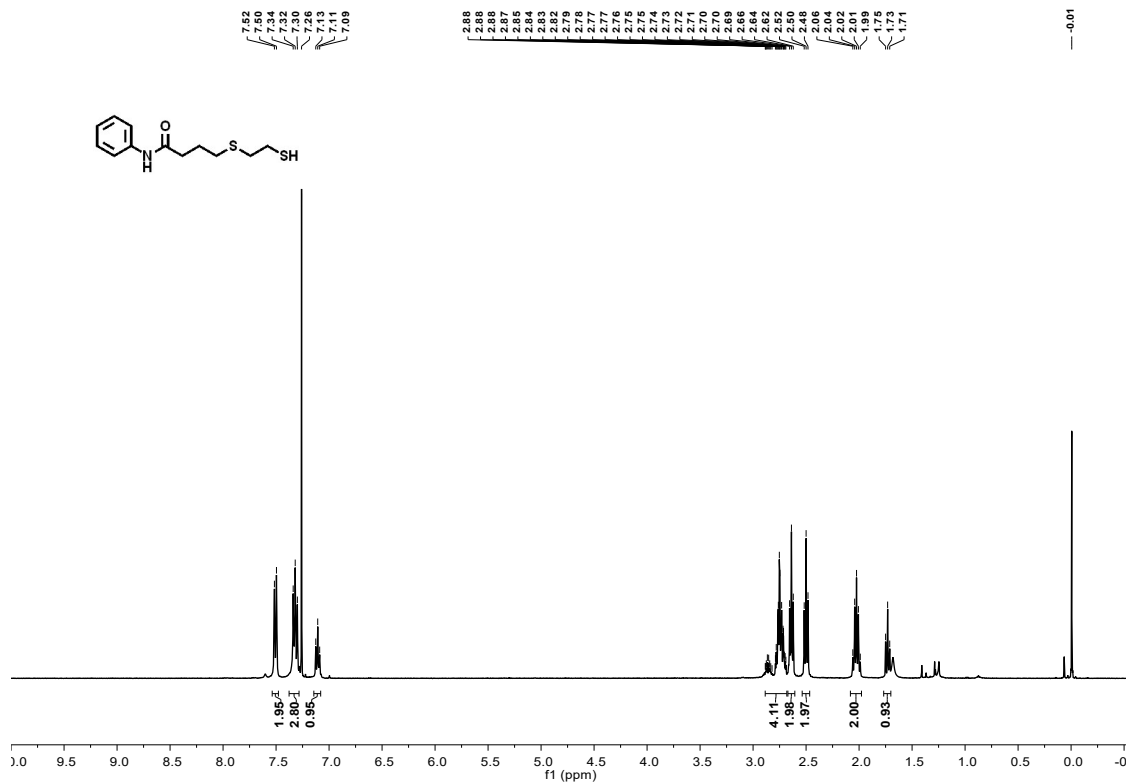

<sup>13</sup>C NMR spectra of 4i

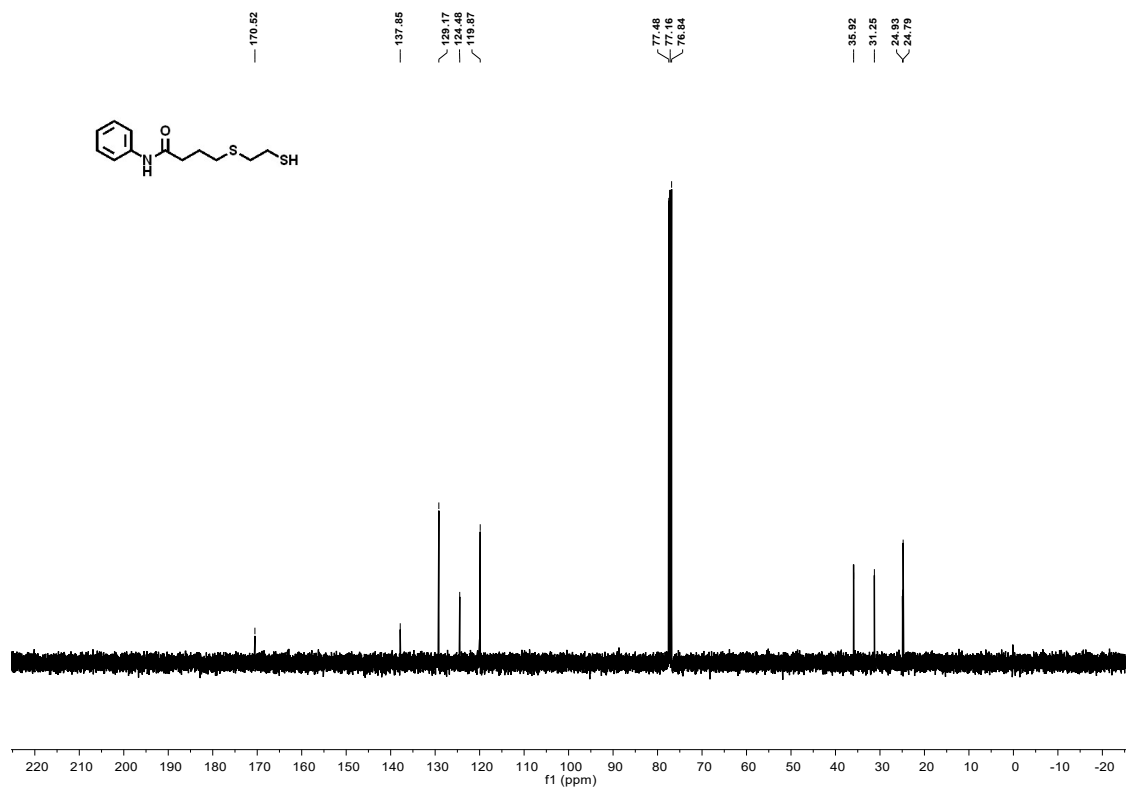

<sup>1</sup>H NMR spectra of 4j

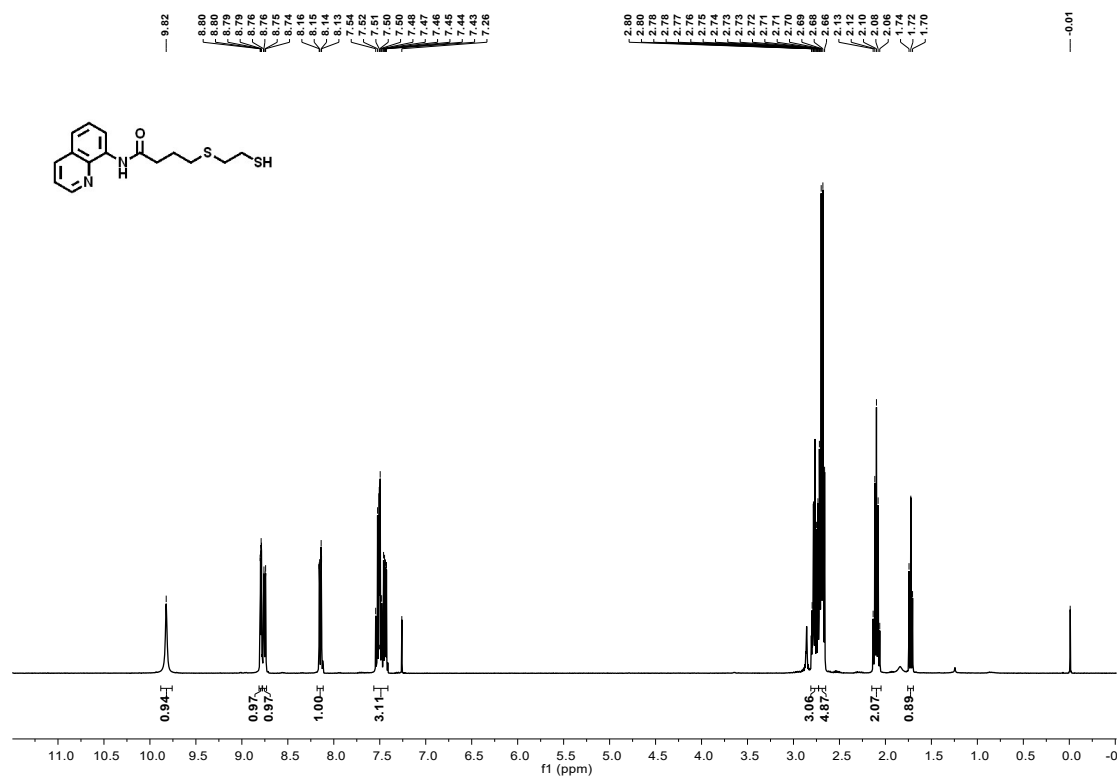

**<sup>13</sup>C NMR spectra of 4j**

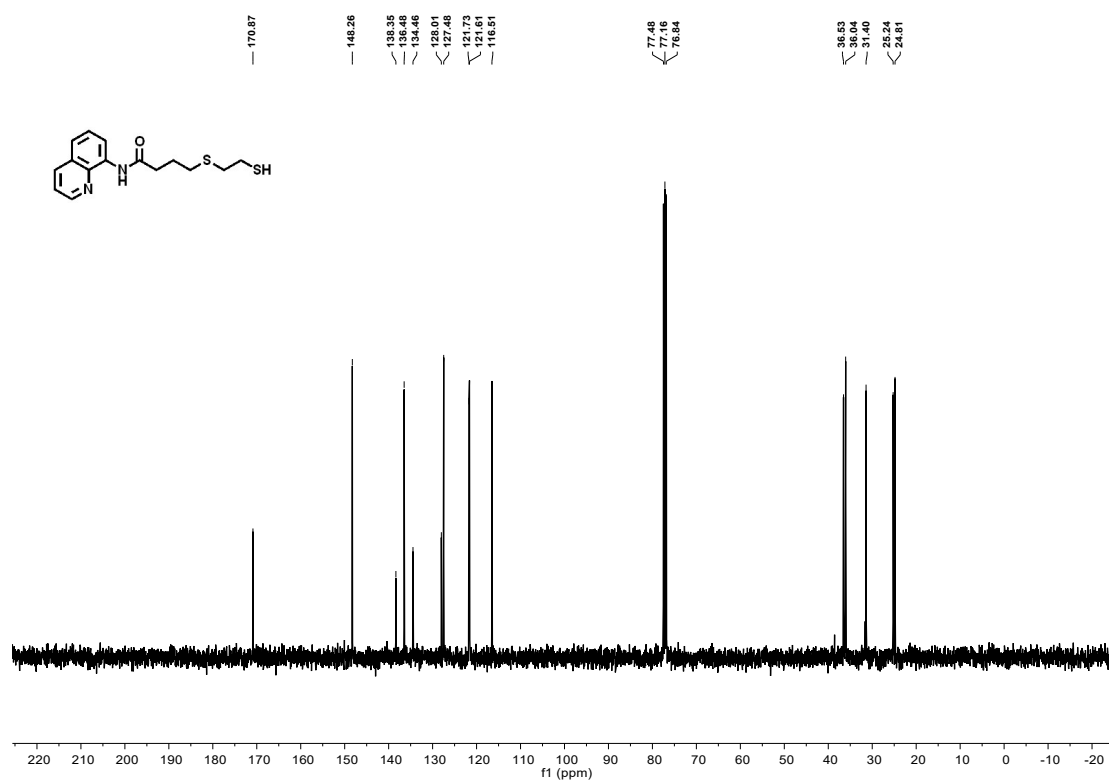

### <sup>1</sup>H NMR spectra of 4k

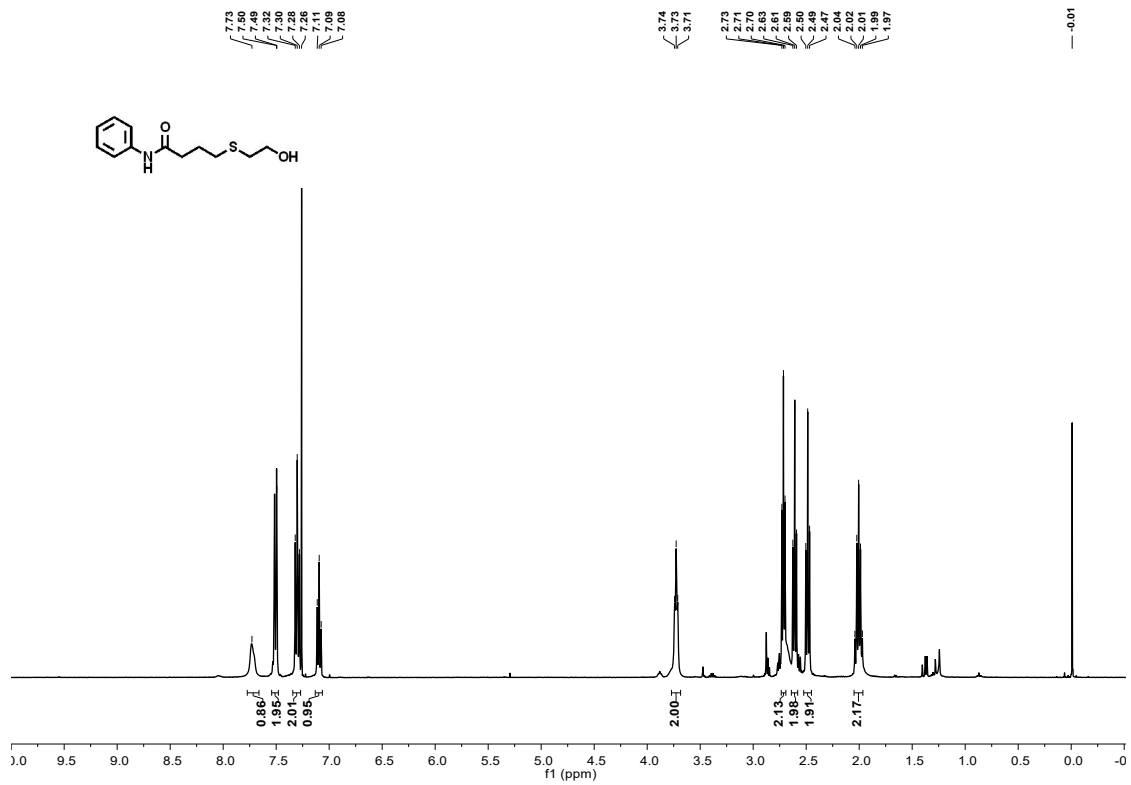

### <sup>13</sup>C NMR spectra of 4k

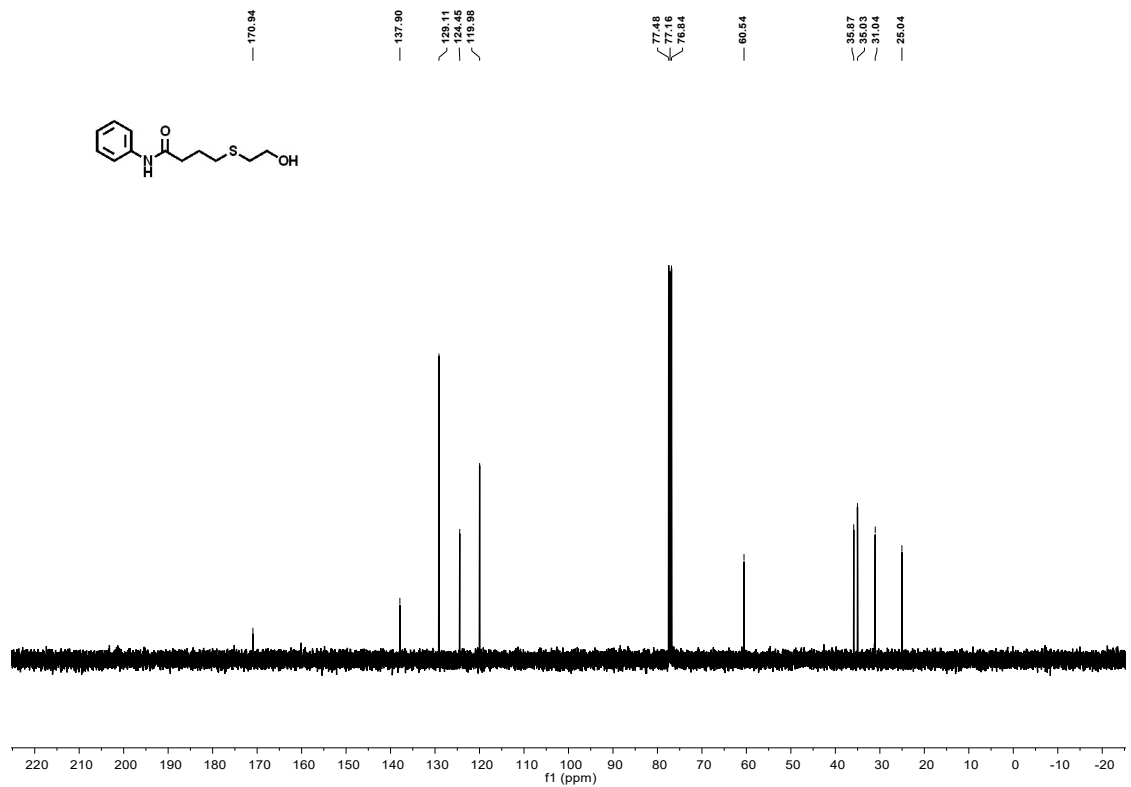

### <sup>1</sup>H NMR spectra of 4l

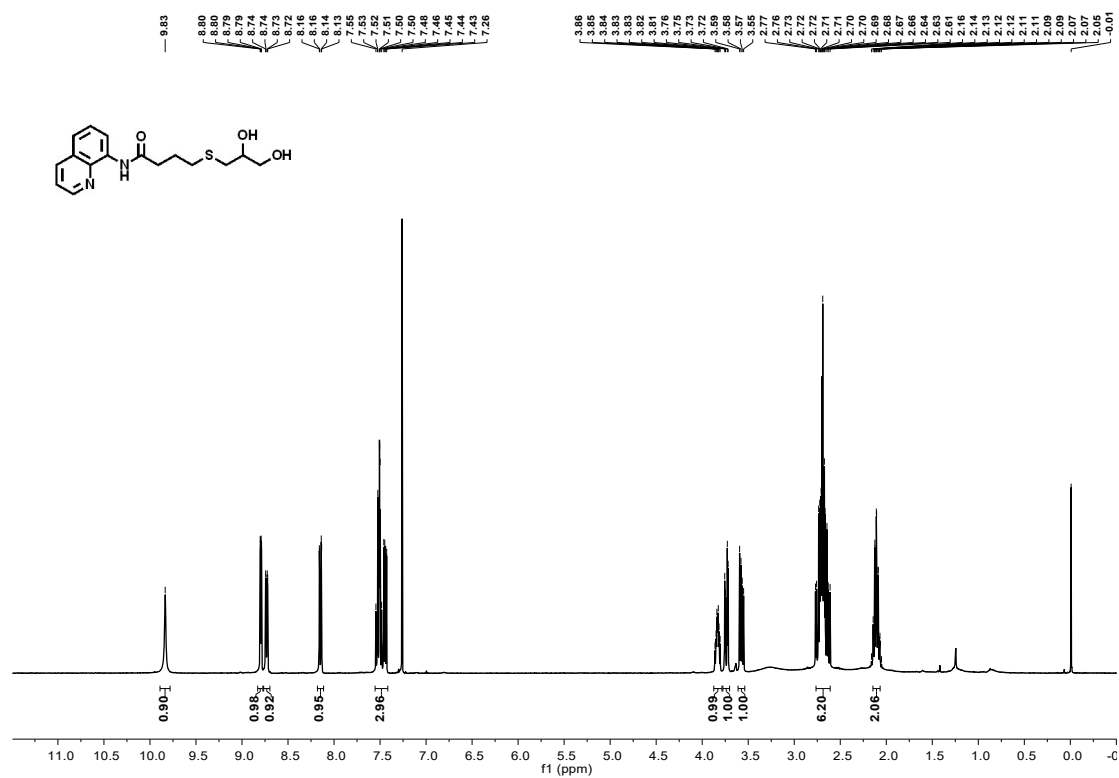

### <sup>13</sup>C NMR spectra of 4l

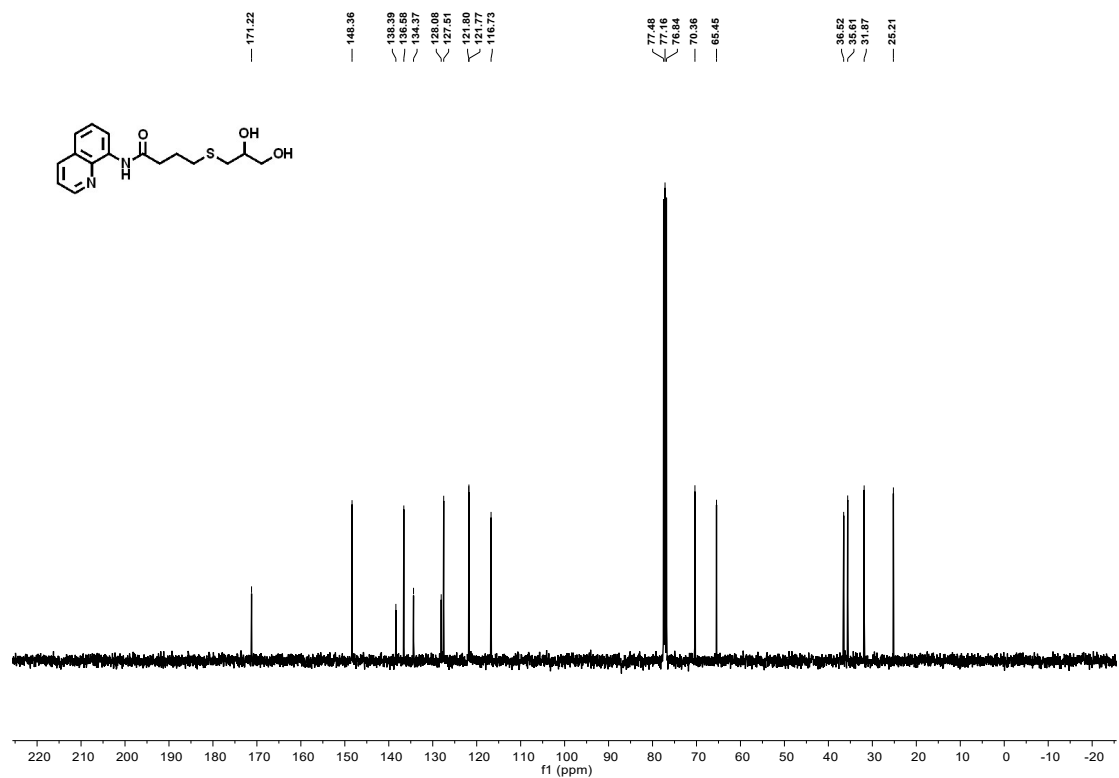



### <sup>1</sup>H NMR spectra of 4m

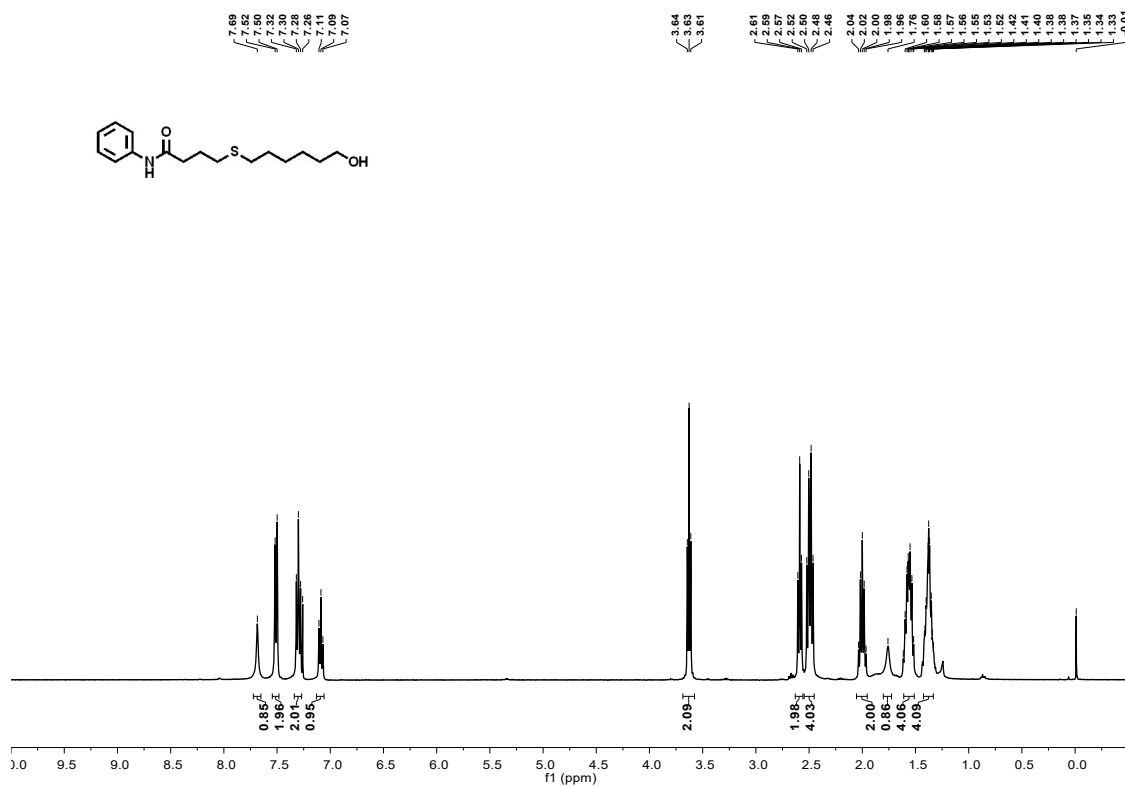

### <sup>13</sup>C NMR spectra of 4m

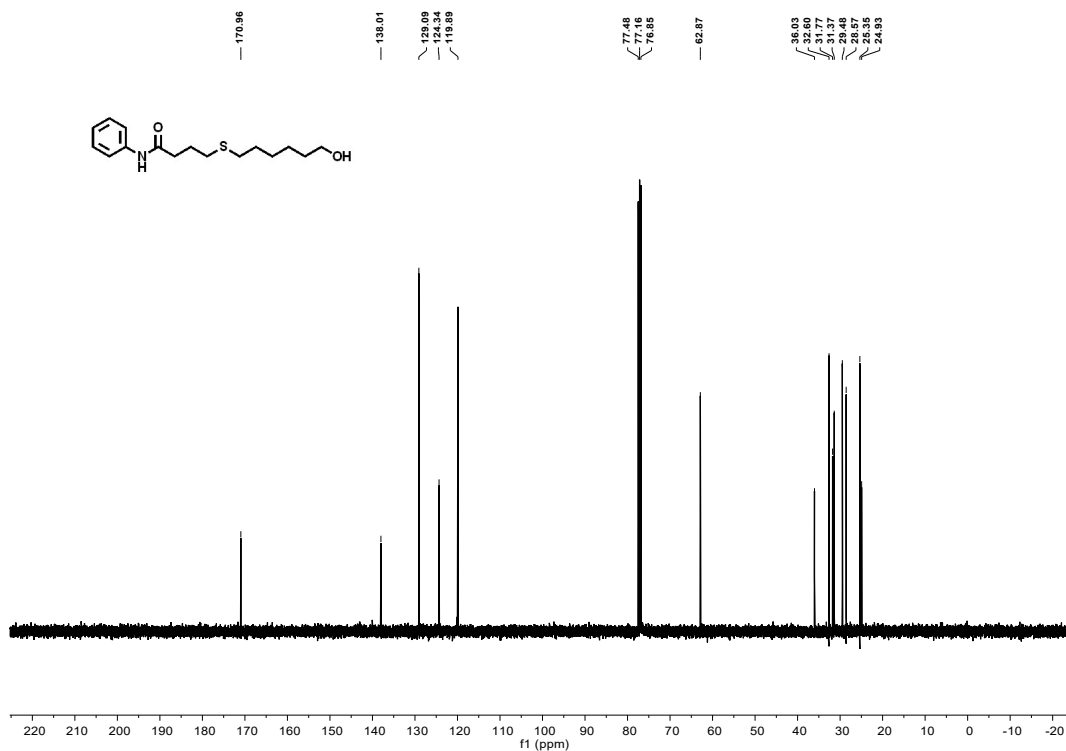

### <sup>1</sup>H NMR spectra of 4n

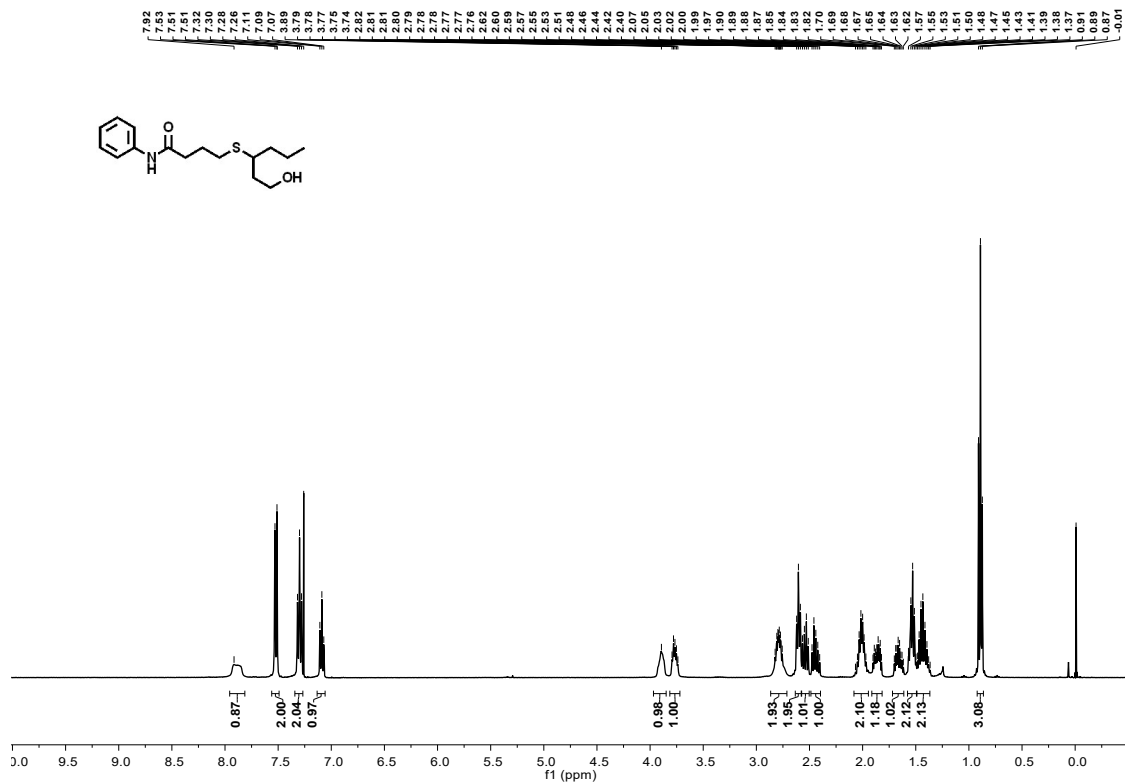

<sup>13</sup>C NMR spectra of 4n

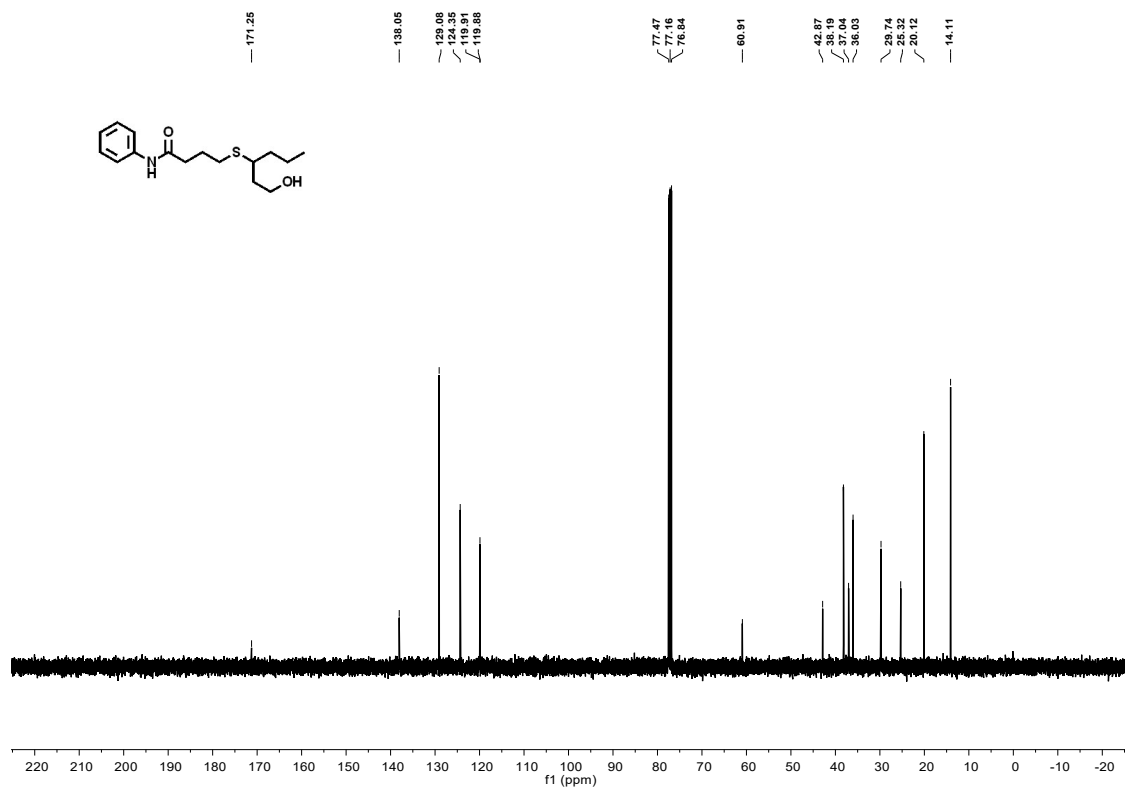

<sup>1</sup>H NMR spectra of 4o

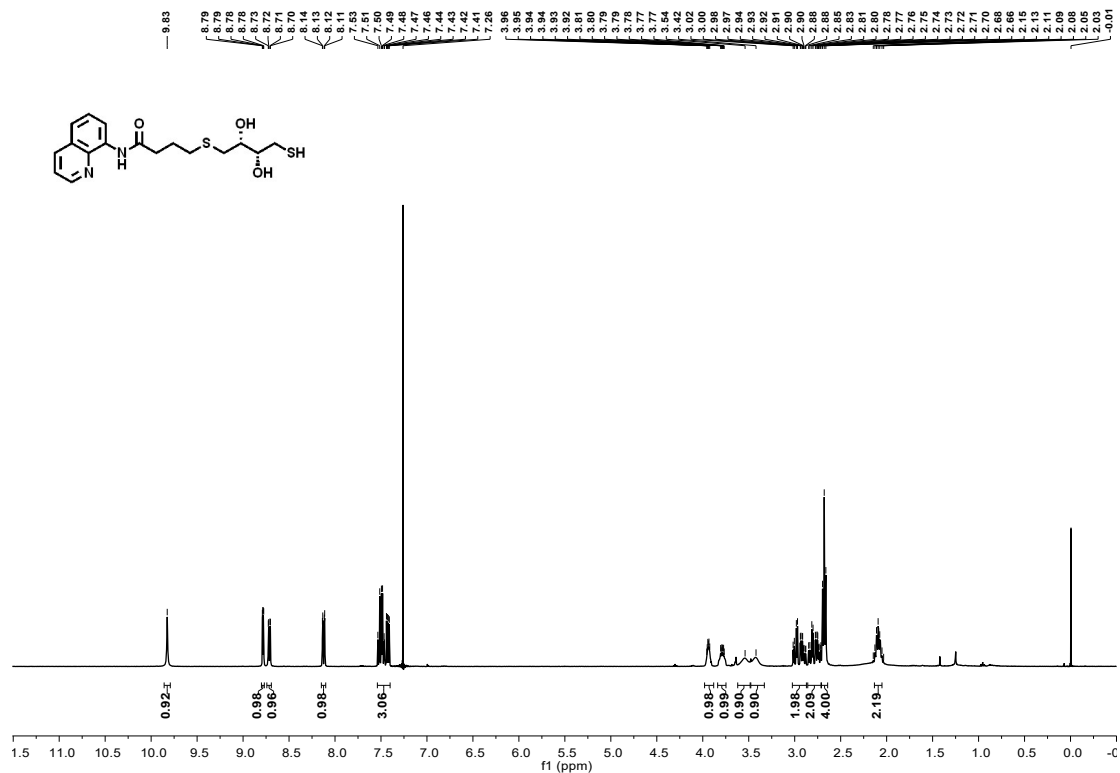

**<sup>13</sup>C NMR spectra of 4o**

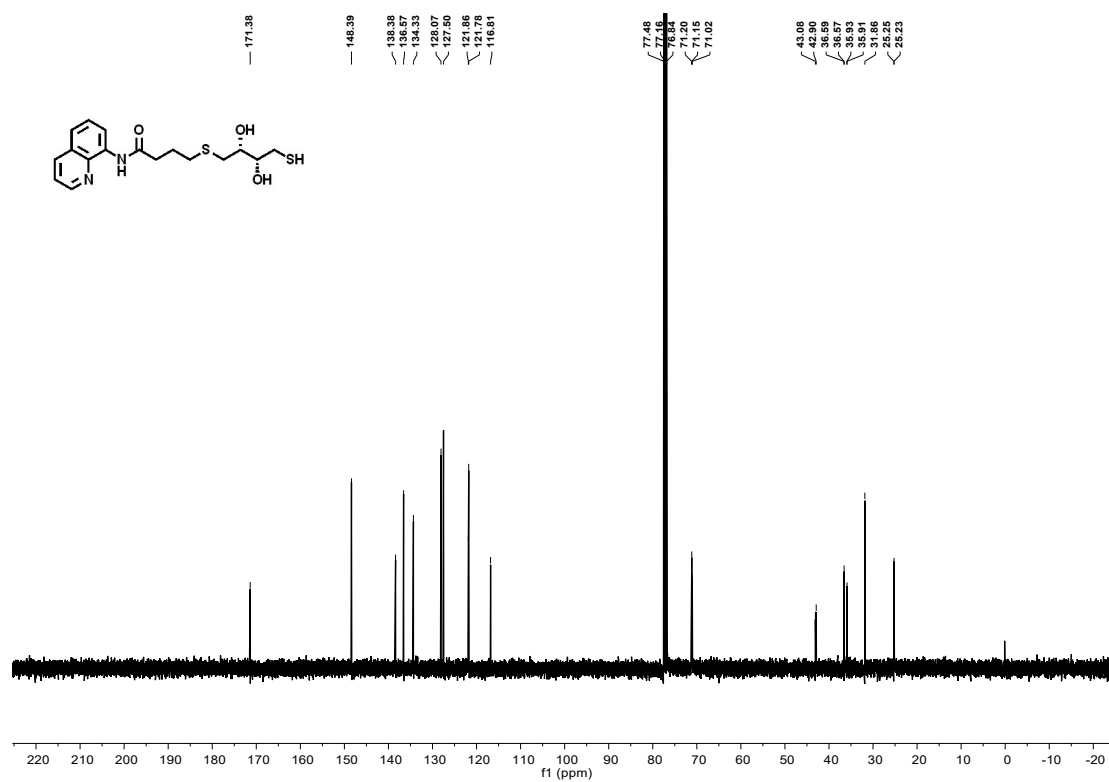

### <sup>1</sup>H NMR spectra of 6a

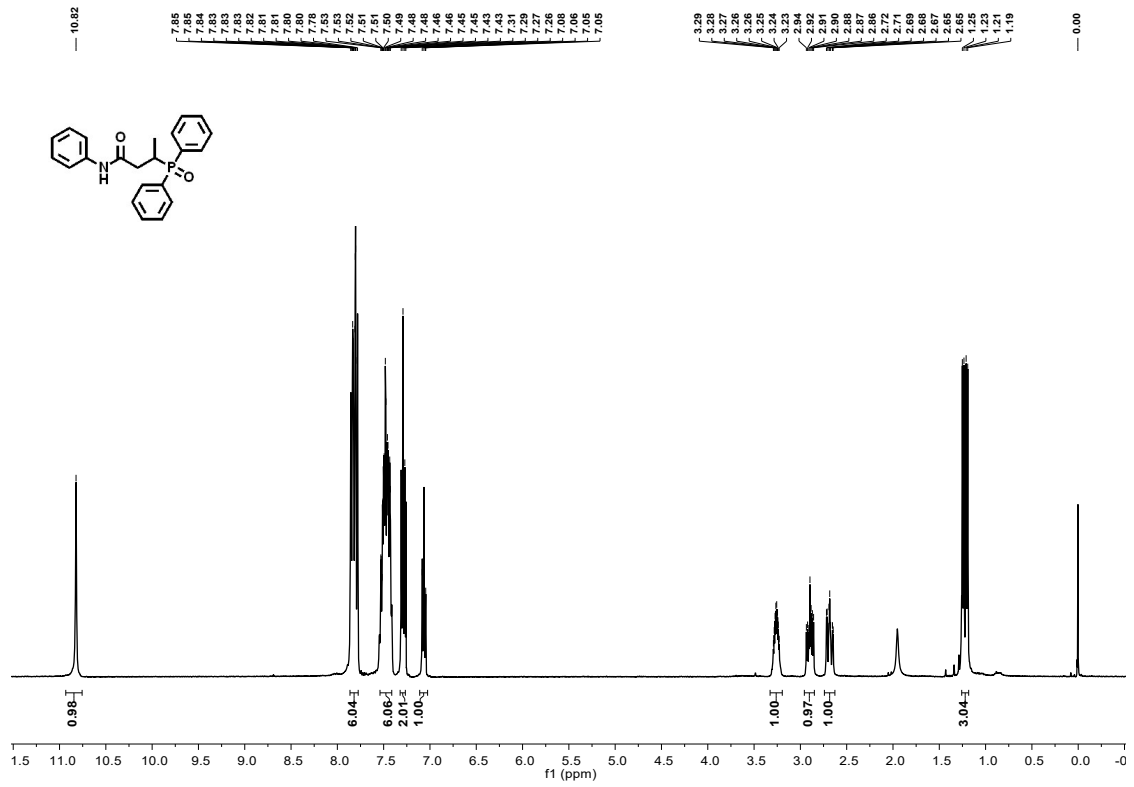

### <sup>13</sup>C NMR spectra of 6a

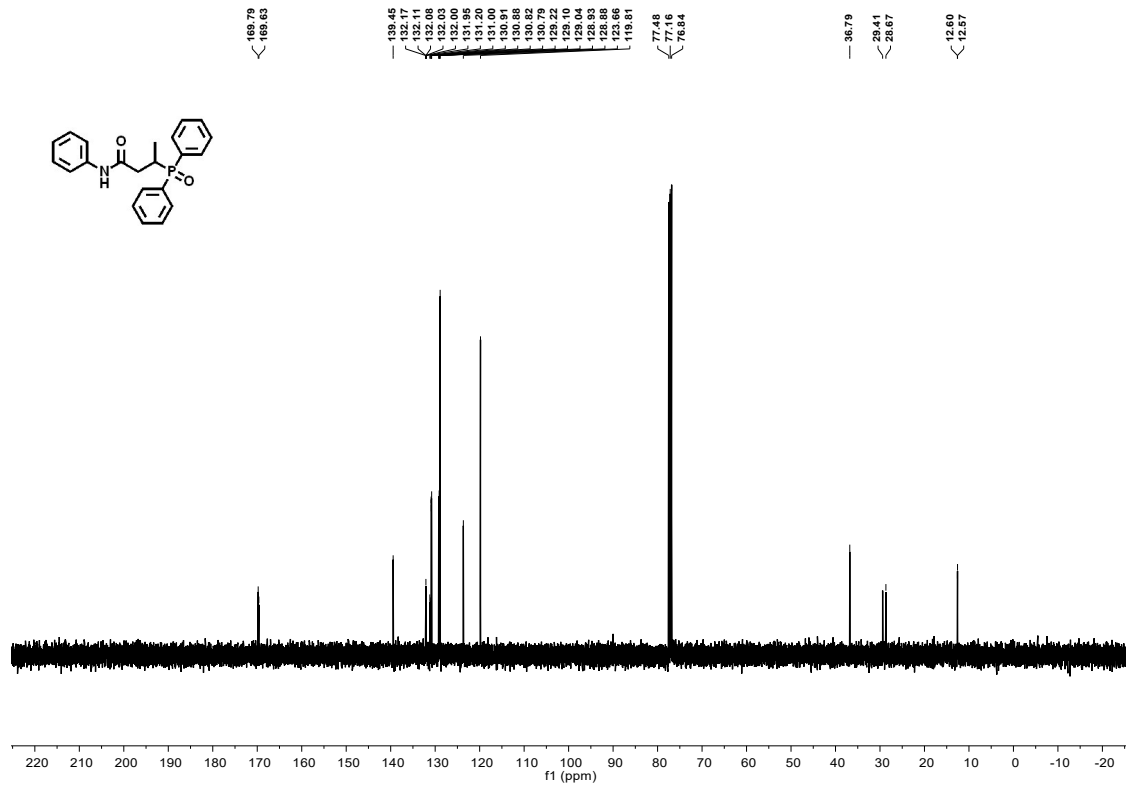

### <sup>31</sup>P NMR spectra of 6a

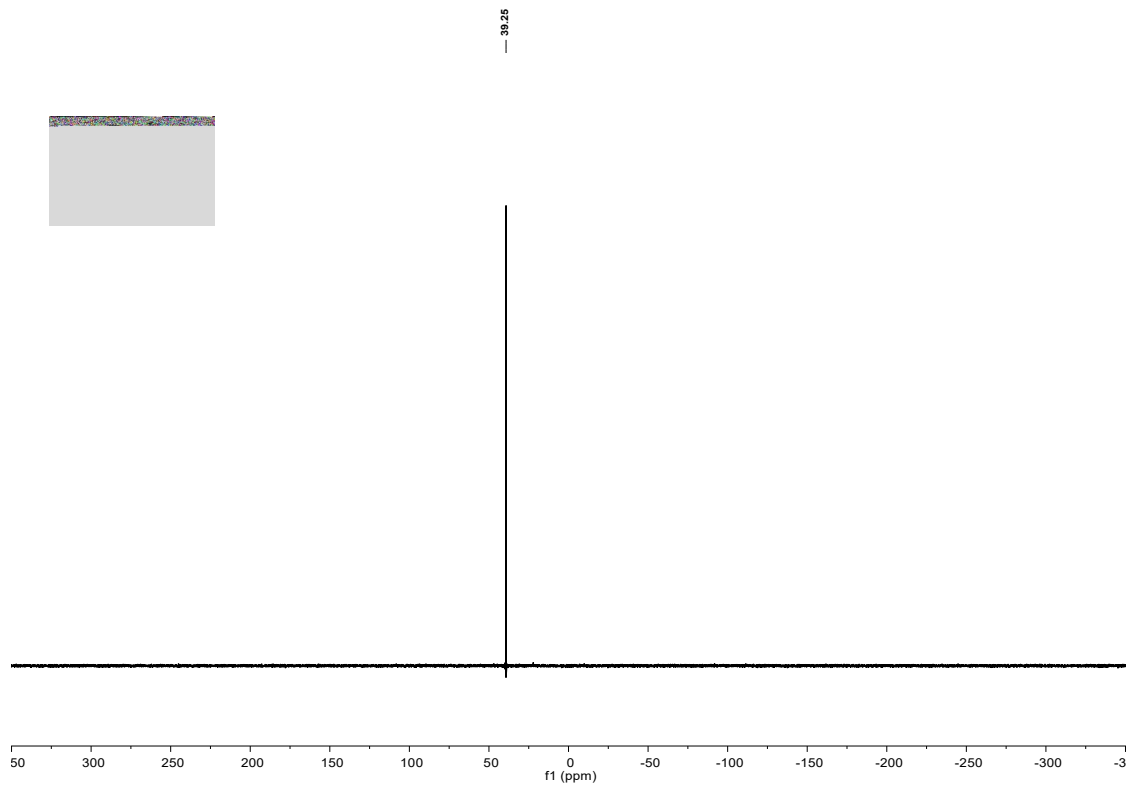

### <sup>1</sup>H NMR spectra of 6b

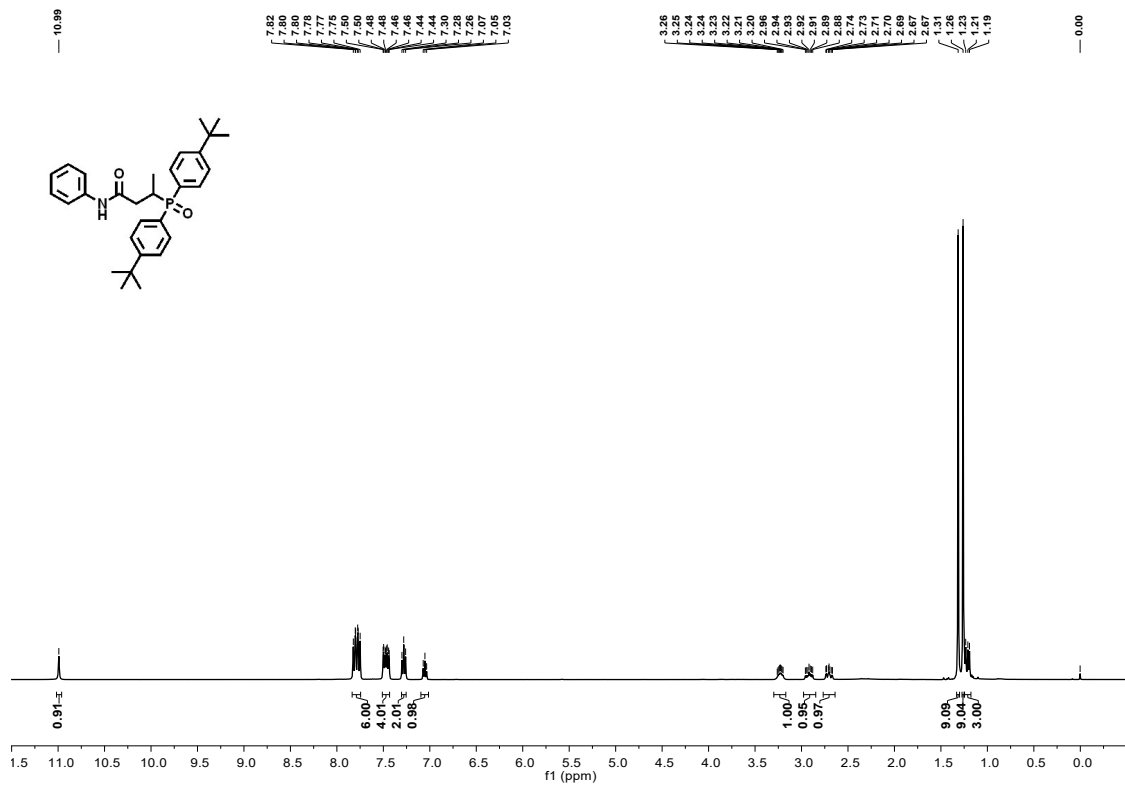

### <sup>13</sup>C NMR spectra of **6b**

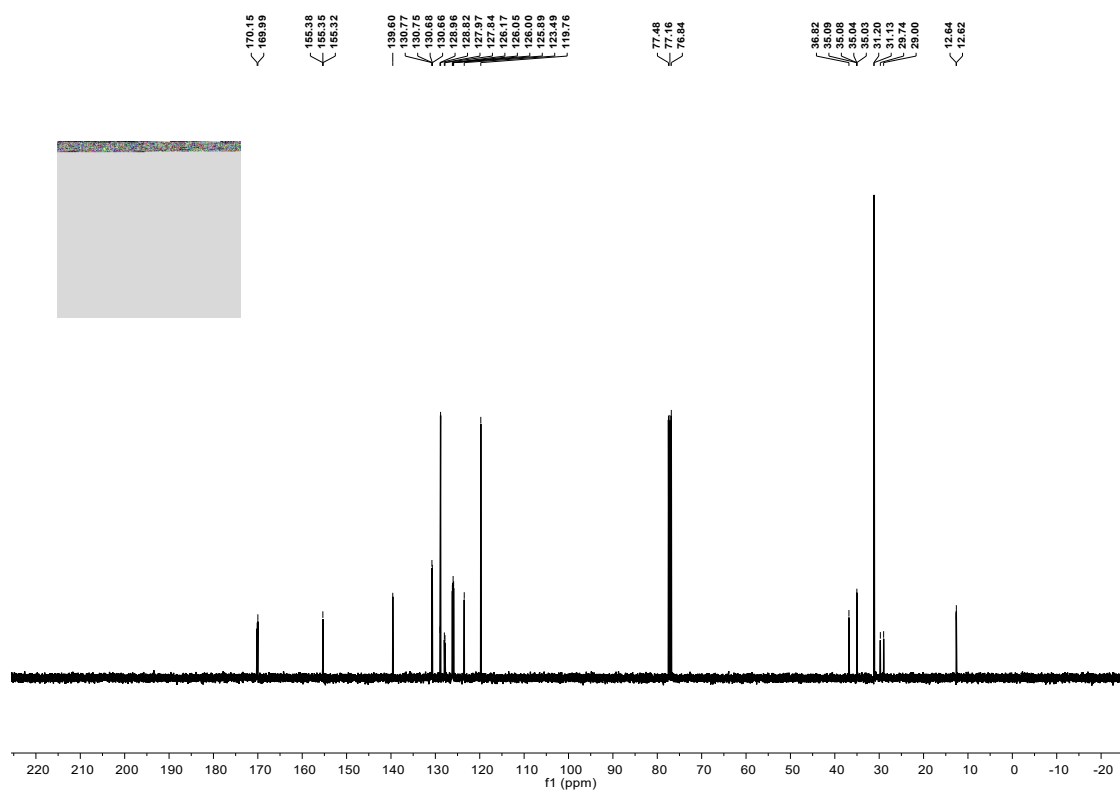

### <sup>31</sup>P NMR spectra of **6b**

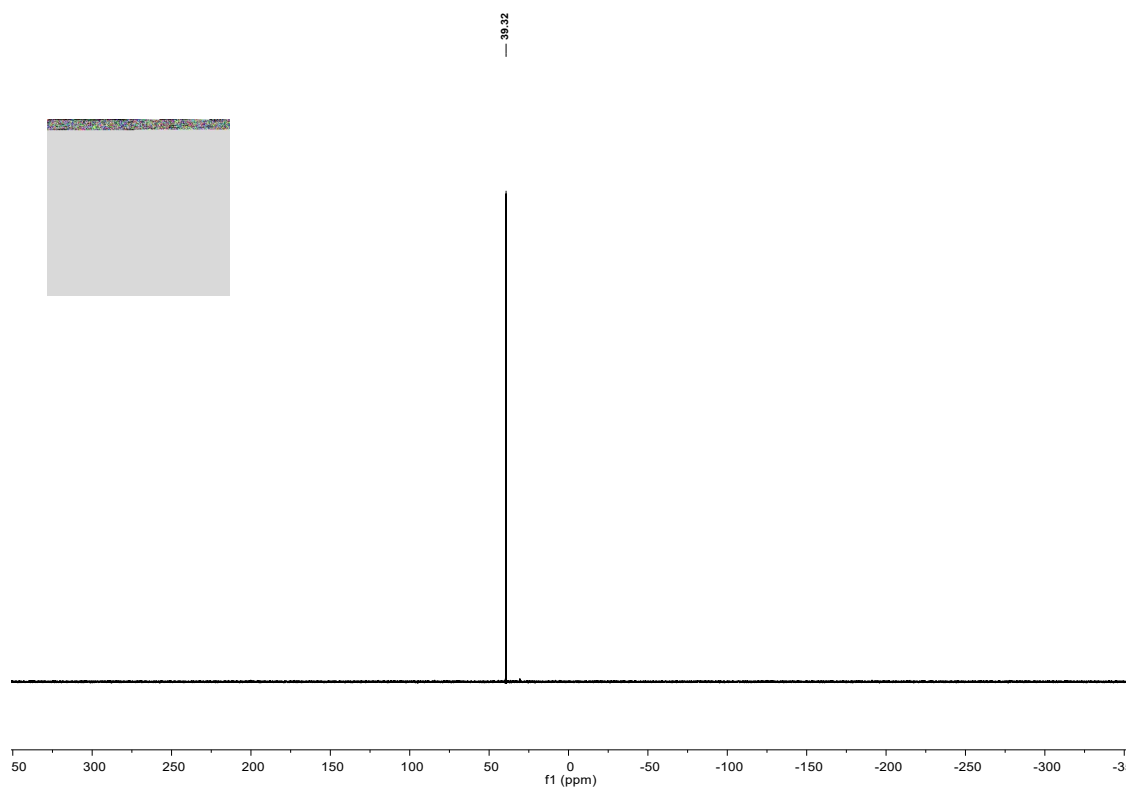

### <sup>1</sup>H NMR spectra of 6c

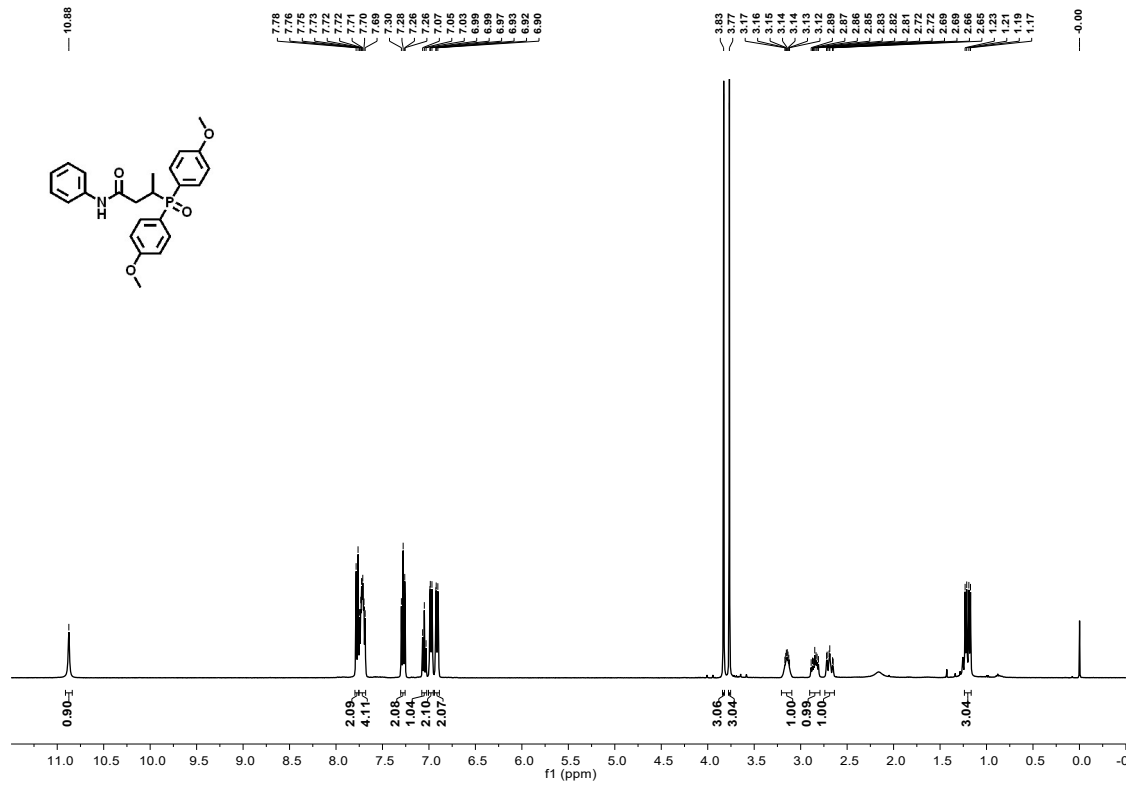

### <sup>13</sup>C NMR spectra of 6c

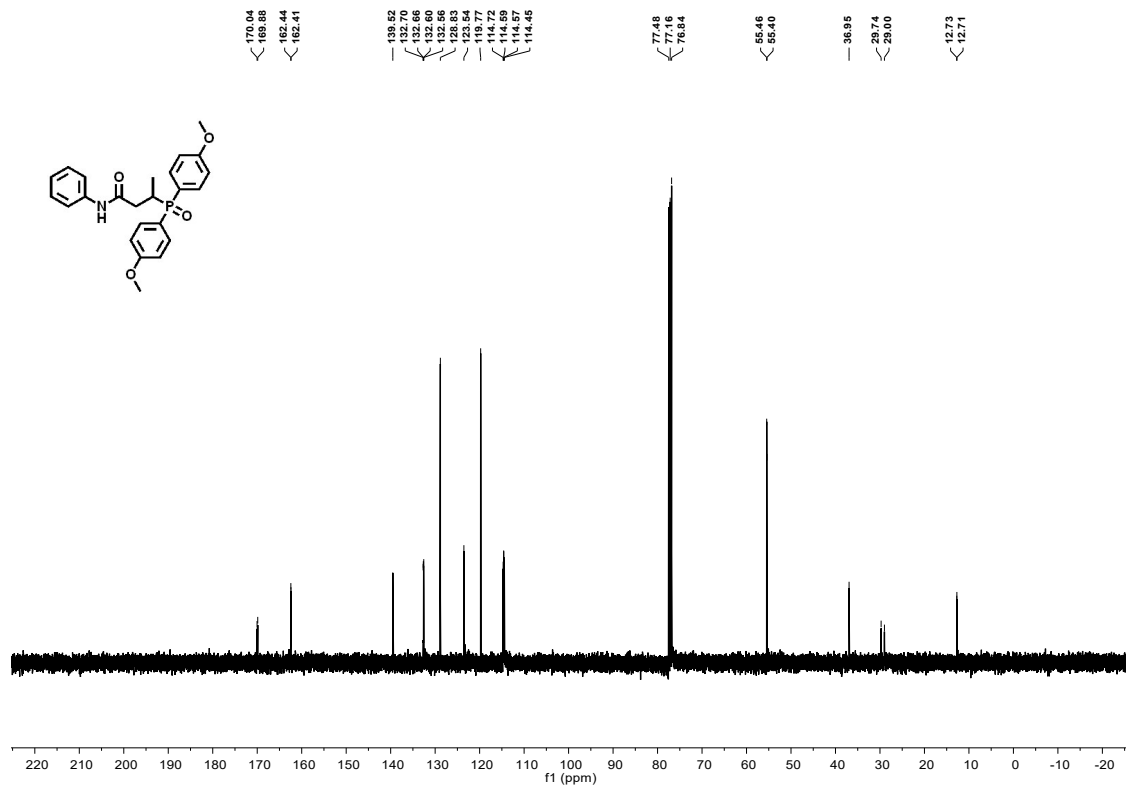

### $^{31}\text{P}$ NMR spectra of **6c**

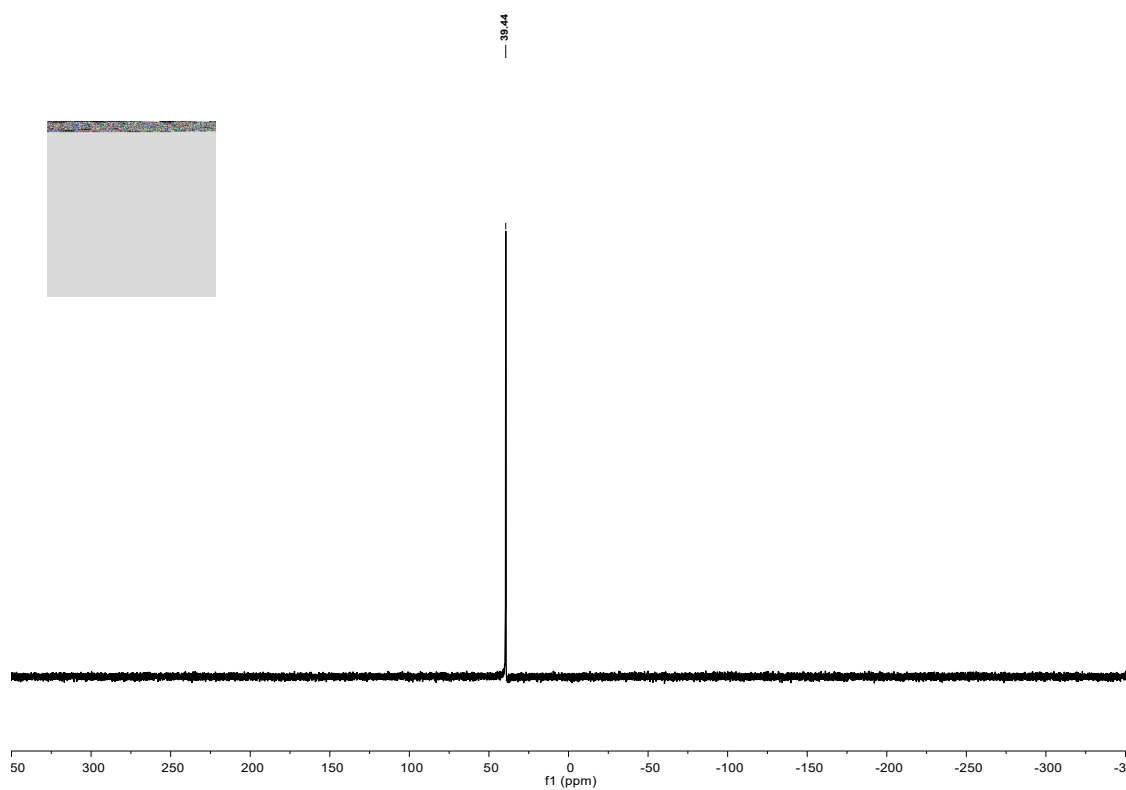

### $^1\text{H}$ NMR spectra of **6d**

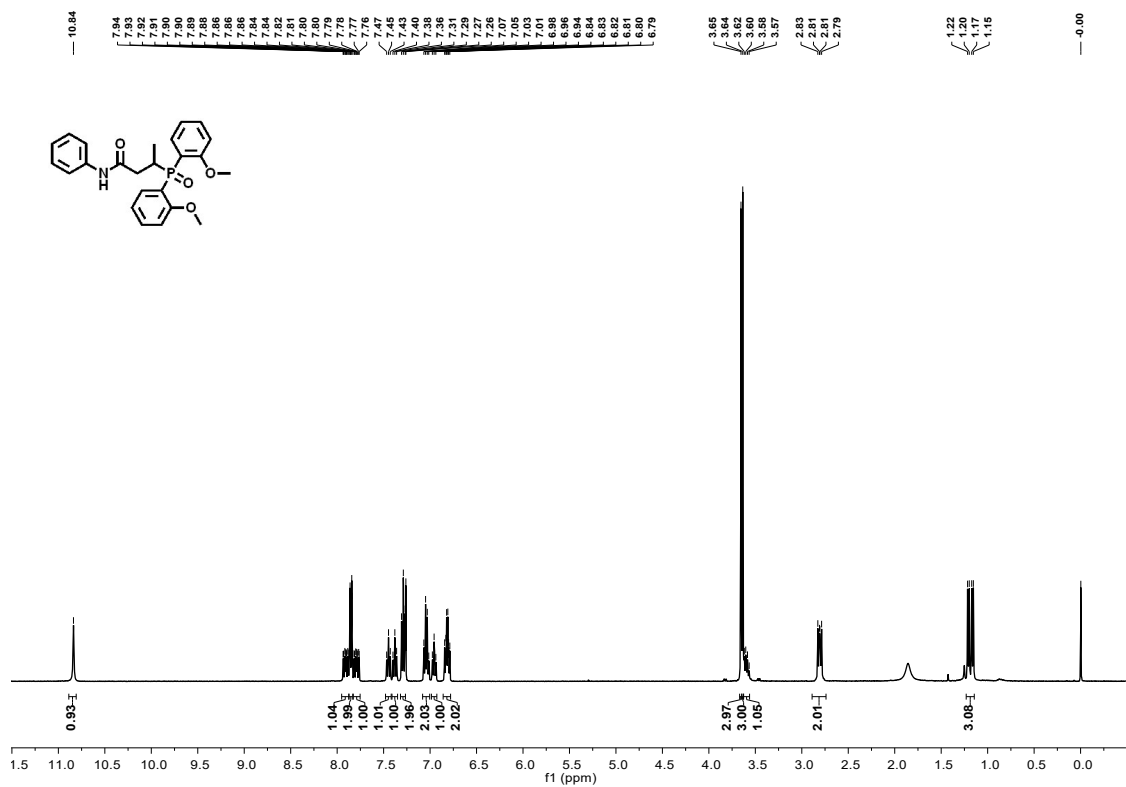



### <sup>13</sup>C NMR spectra of 6d

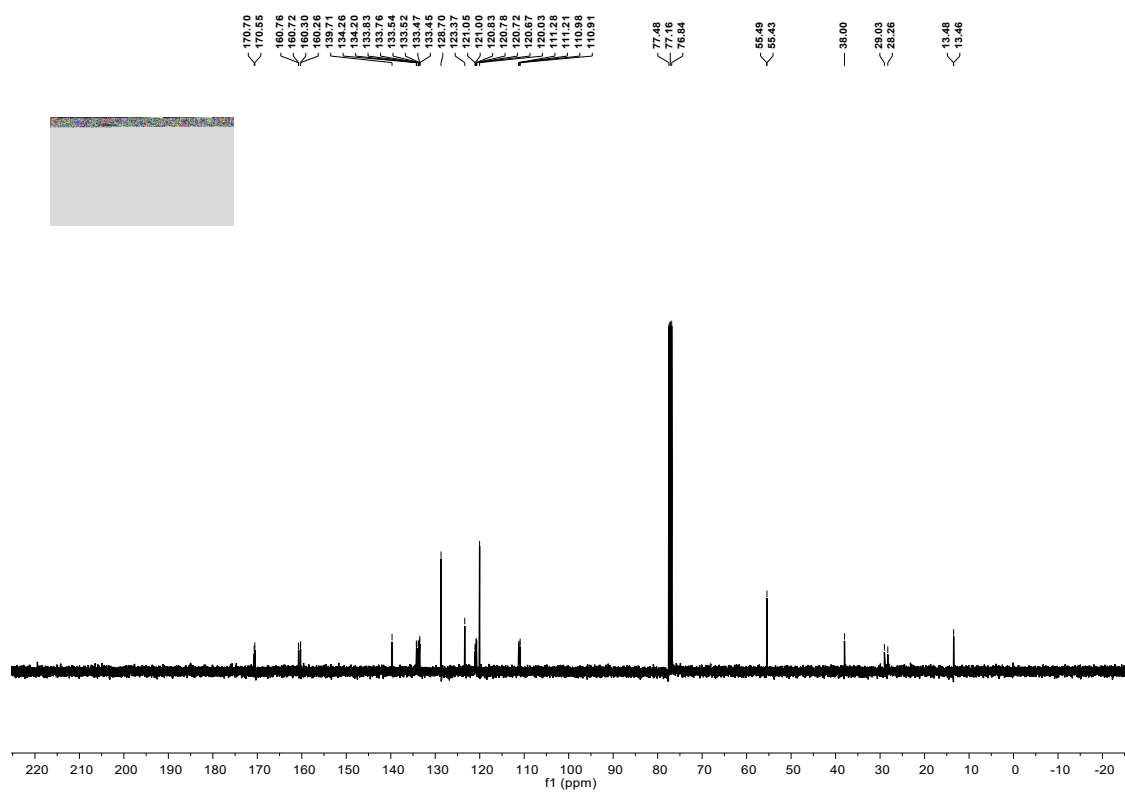

### <sup>31</sup>P NMR spectra of 6d

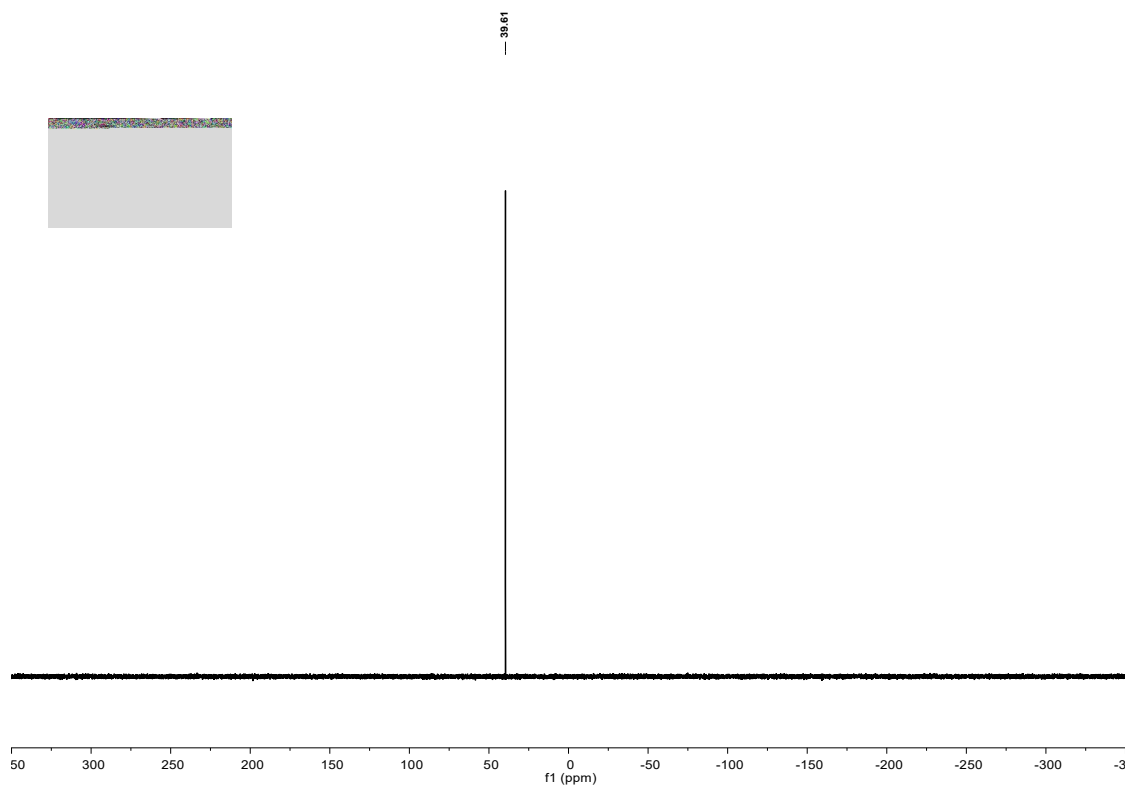

### <sup>1</sup>H NMR spectra of 6e

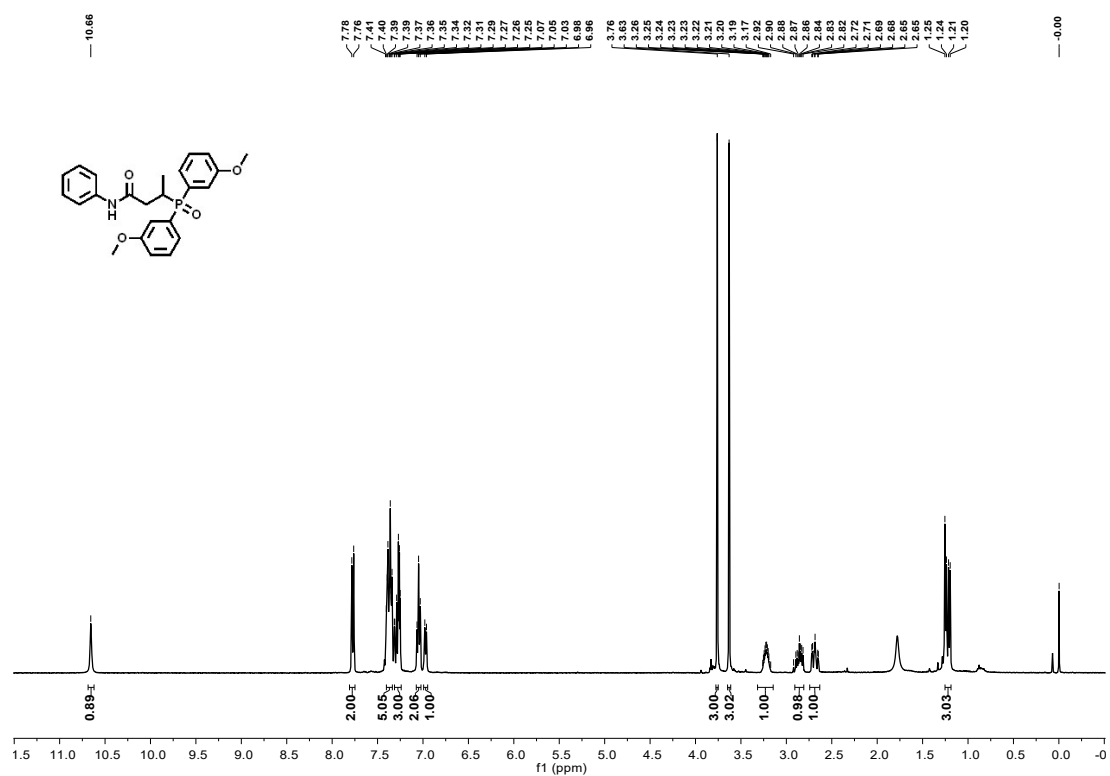

### <sup>13</sup>C NMR spectra of 6e

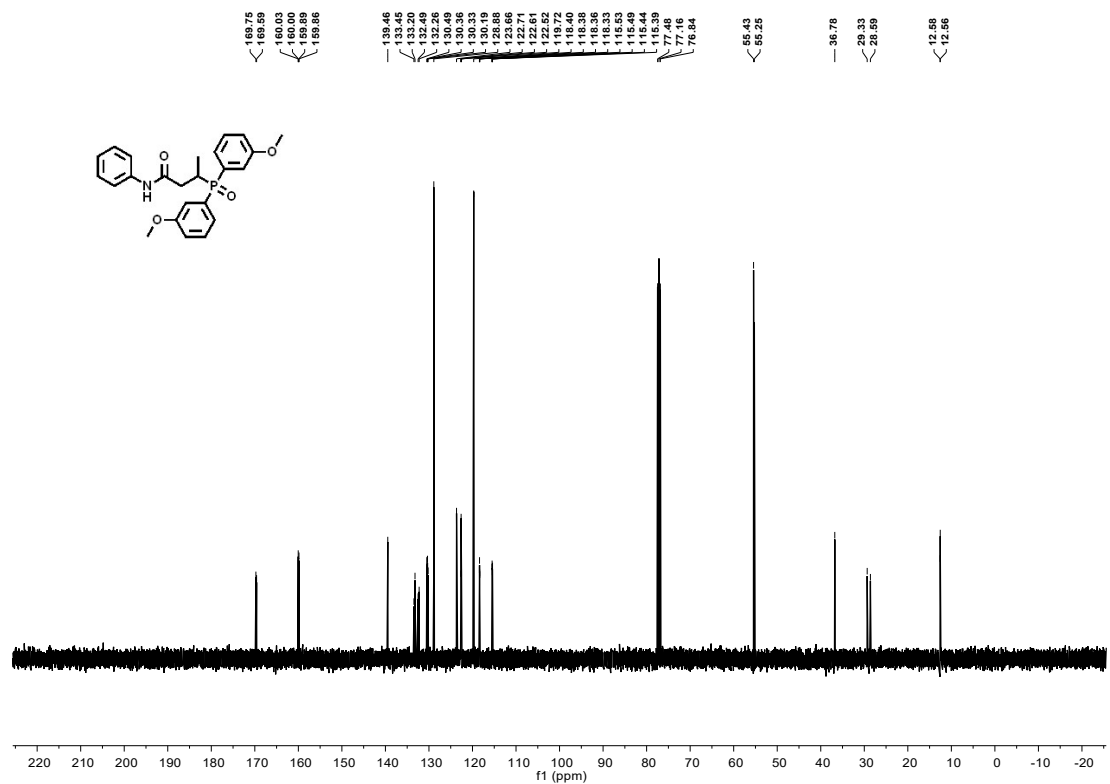

### <sup>31</sup>P NMR spectra of 6e

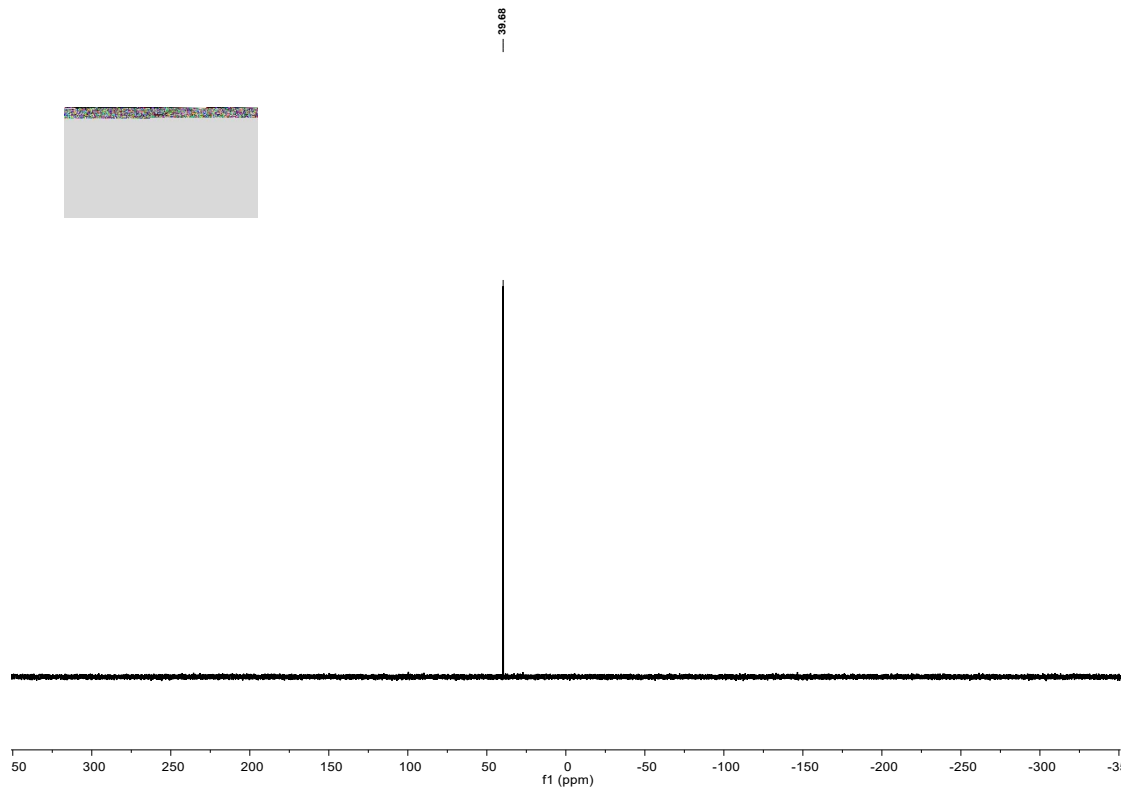

<sup>1</sup>H NMR spectra of 6f

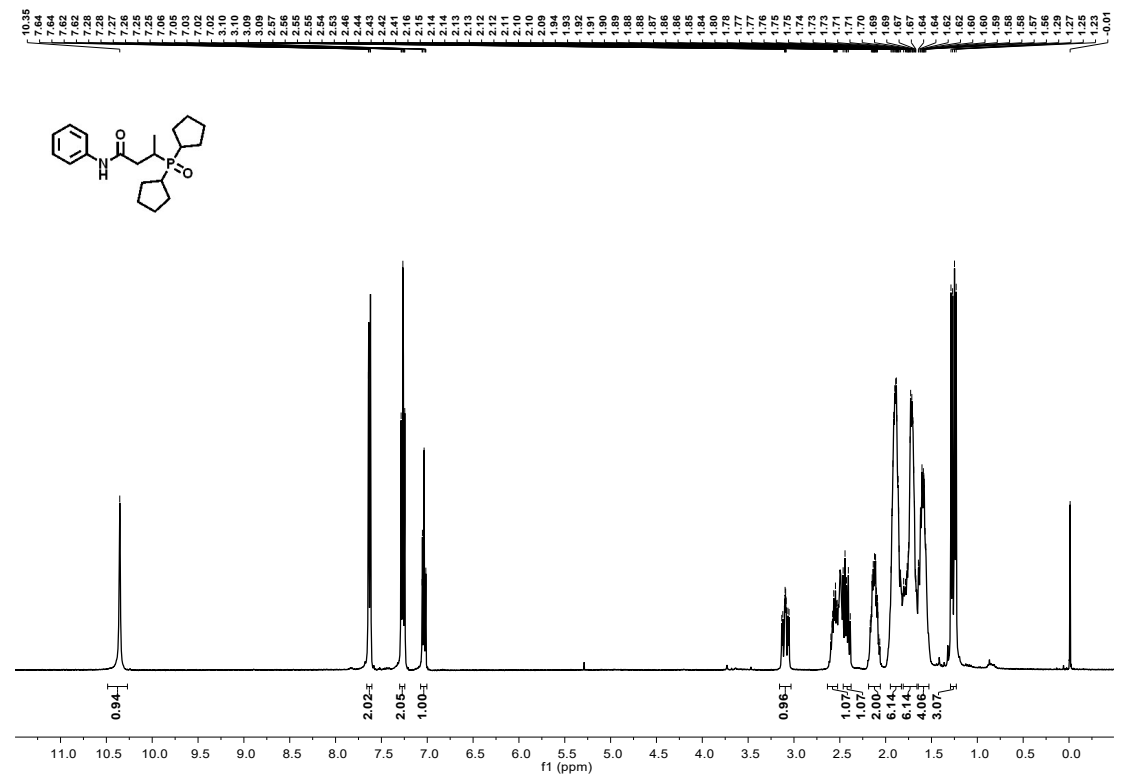

<sup>13</sup>C NMR spectra of 6f

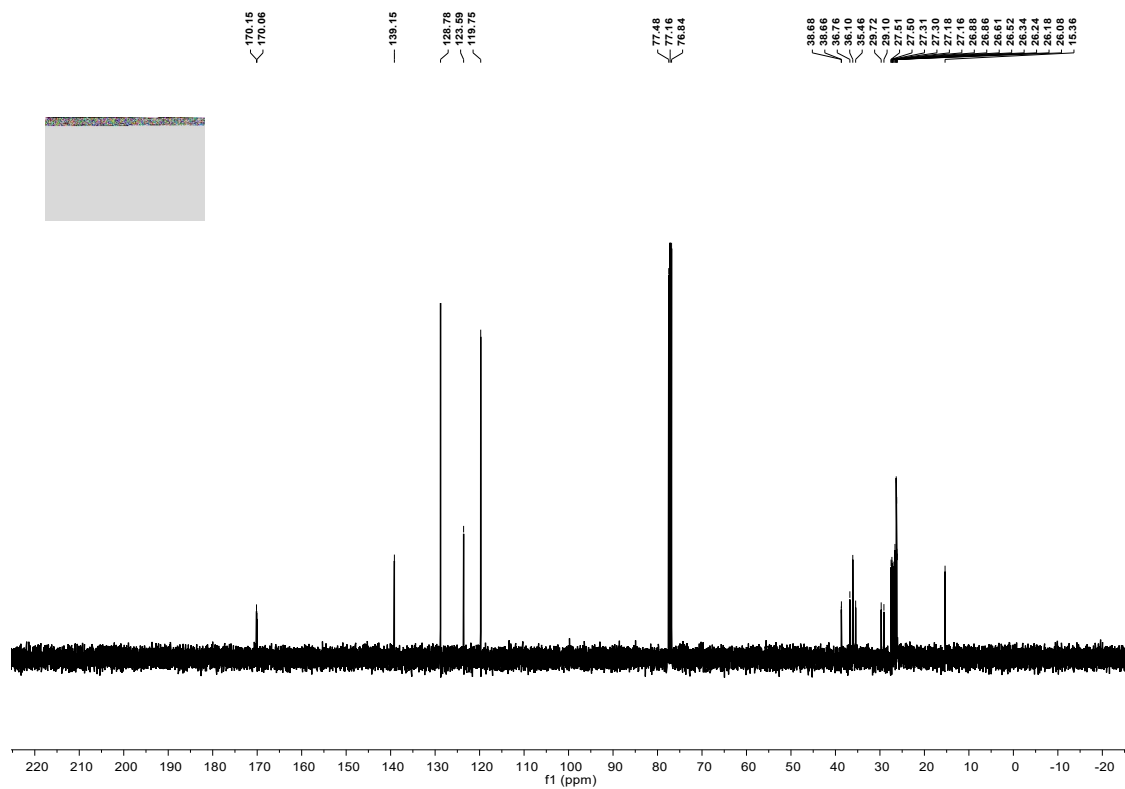

$^{31}\text{P}$  NMR spectra of **6f**

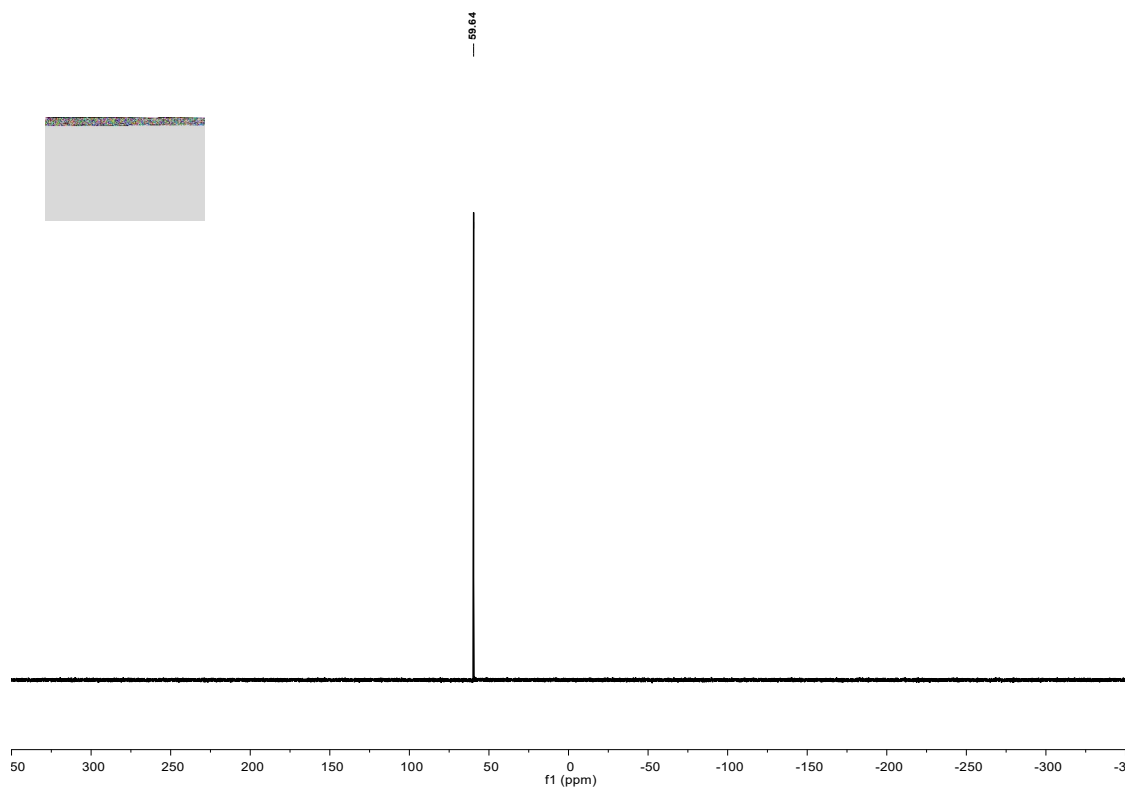

$^1\text{H}$  NMR spectra of **6g**

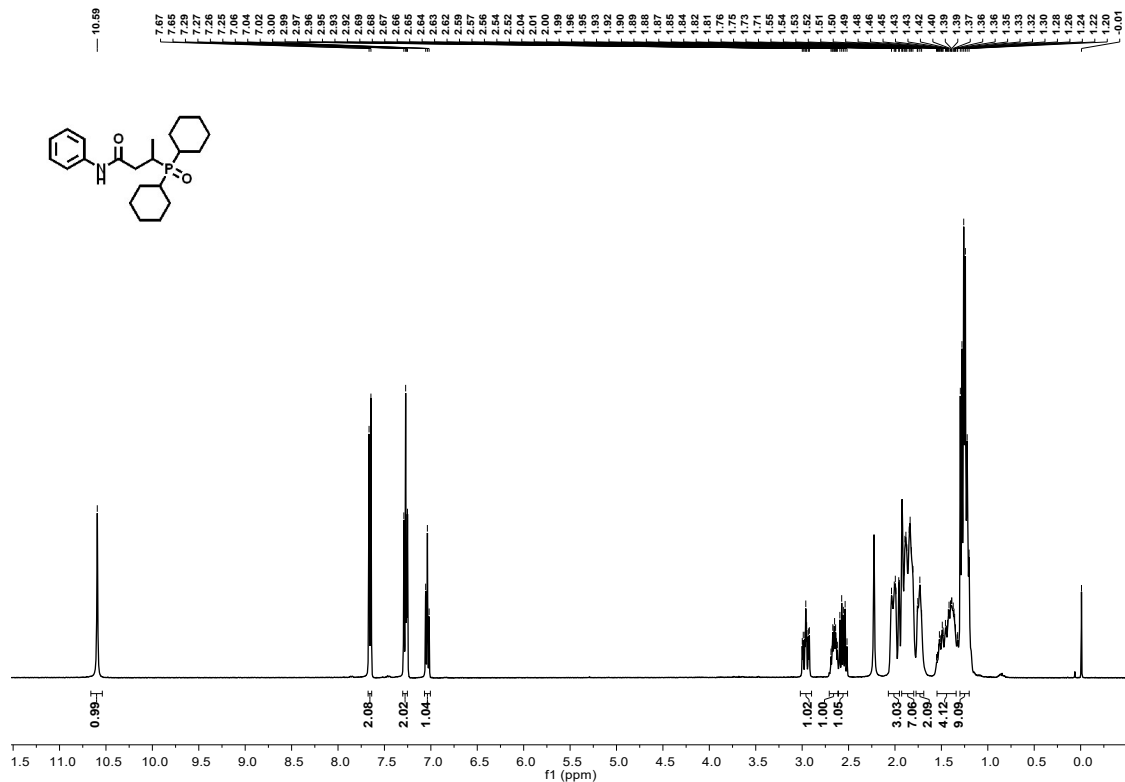

**<sup>13</sup>C NMR spectra of 6g**

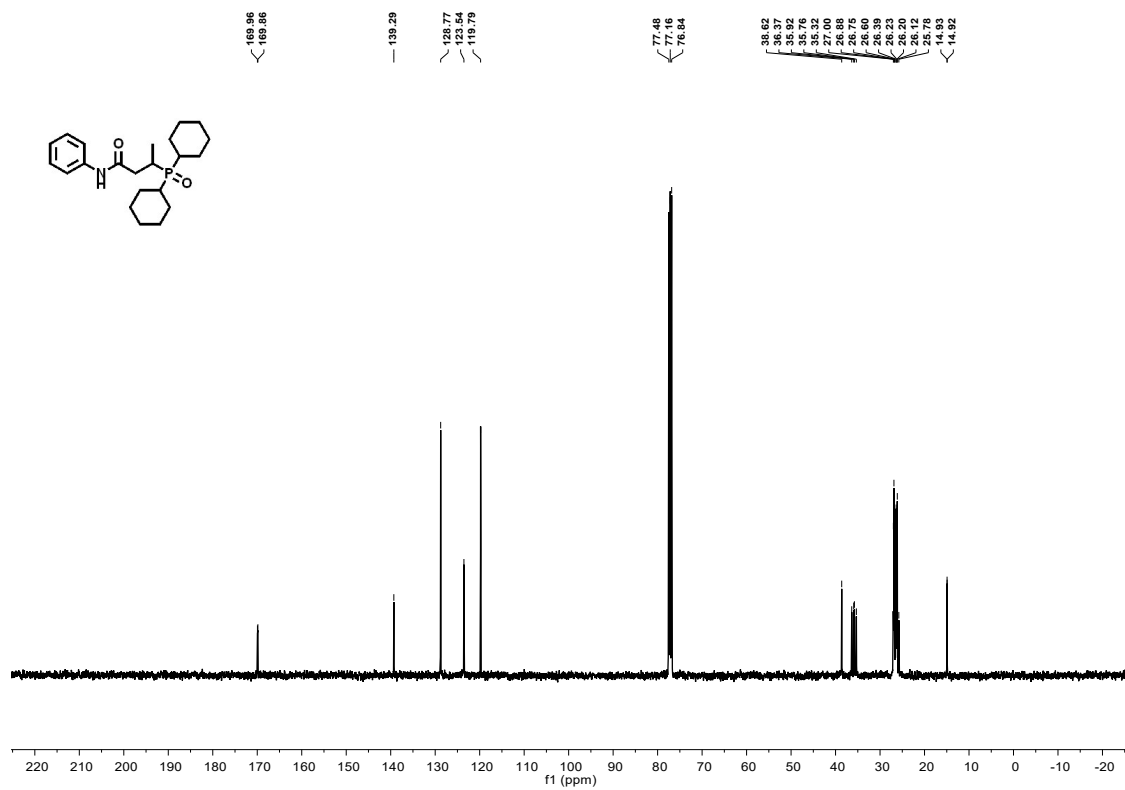

**<sup>31</sup>P NMR spectra of 6g**

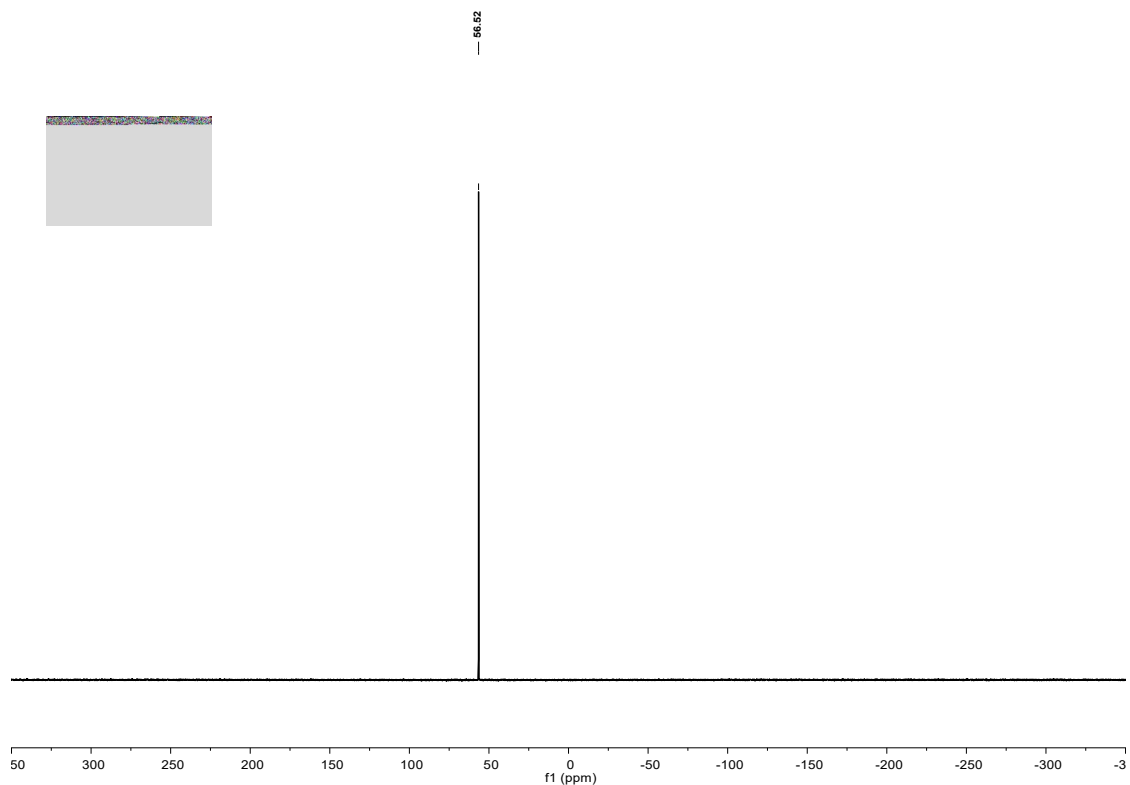

<sup>1</sup>H NMR spectra of 7a

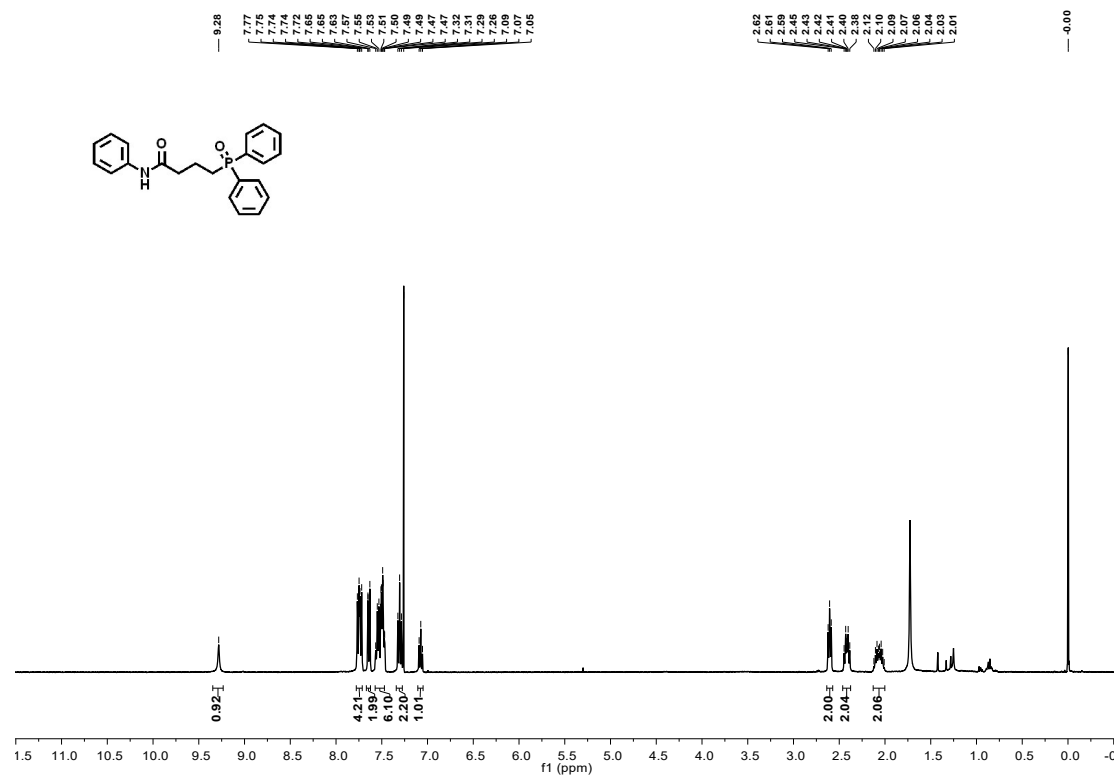

<sup>13</sup>C NMR spectra of 7a

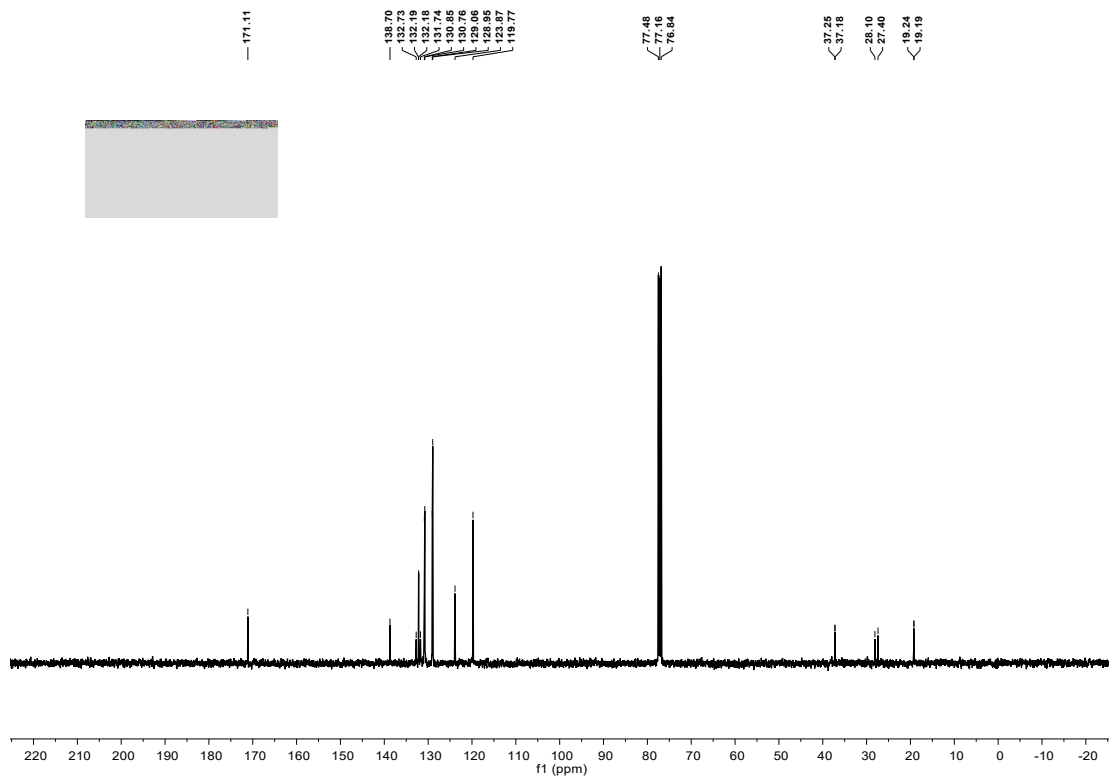

$^{31}\text{P}$  NMR spectra of **7a**

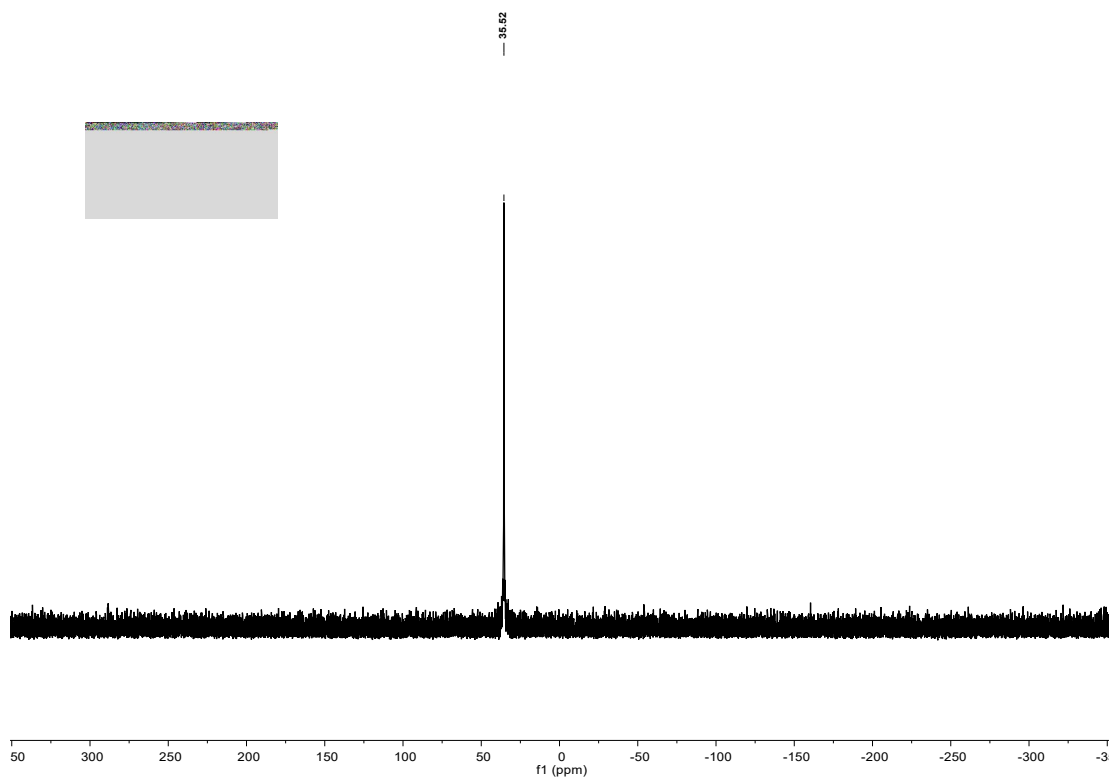

### <sup>1</sup>H NMR spectra of 7b

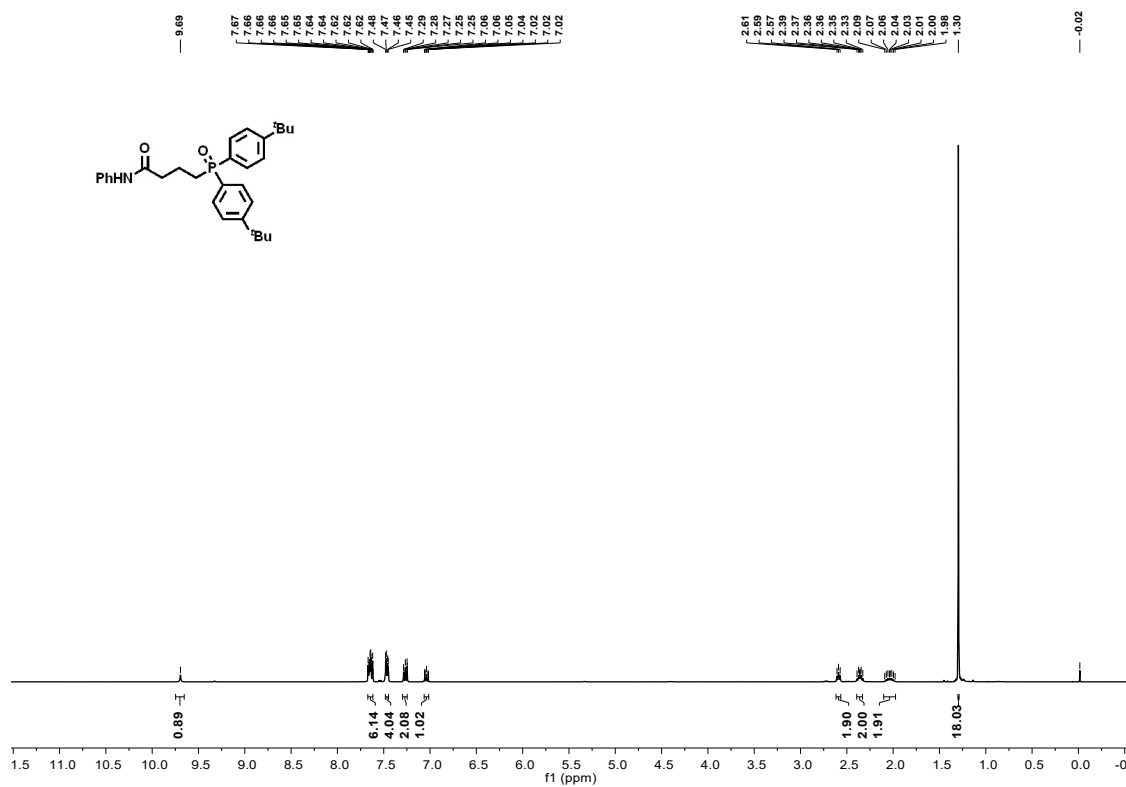

### <sup>13</sup>C NMR spectra of 7b

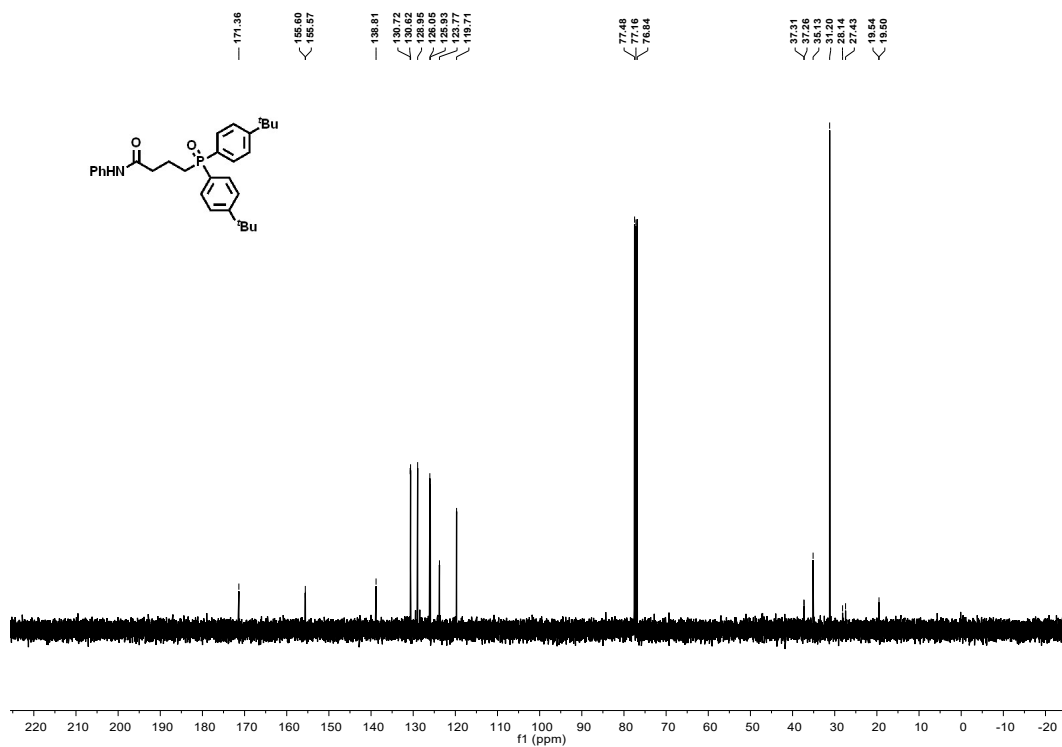

### <sup>31</sup>P NMR spectra of 7b



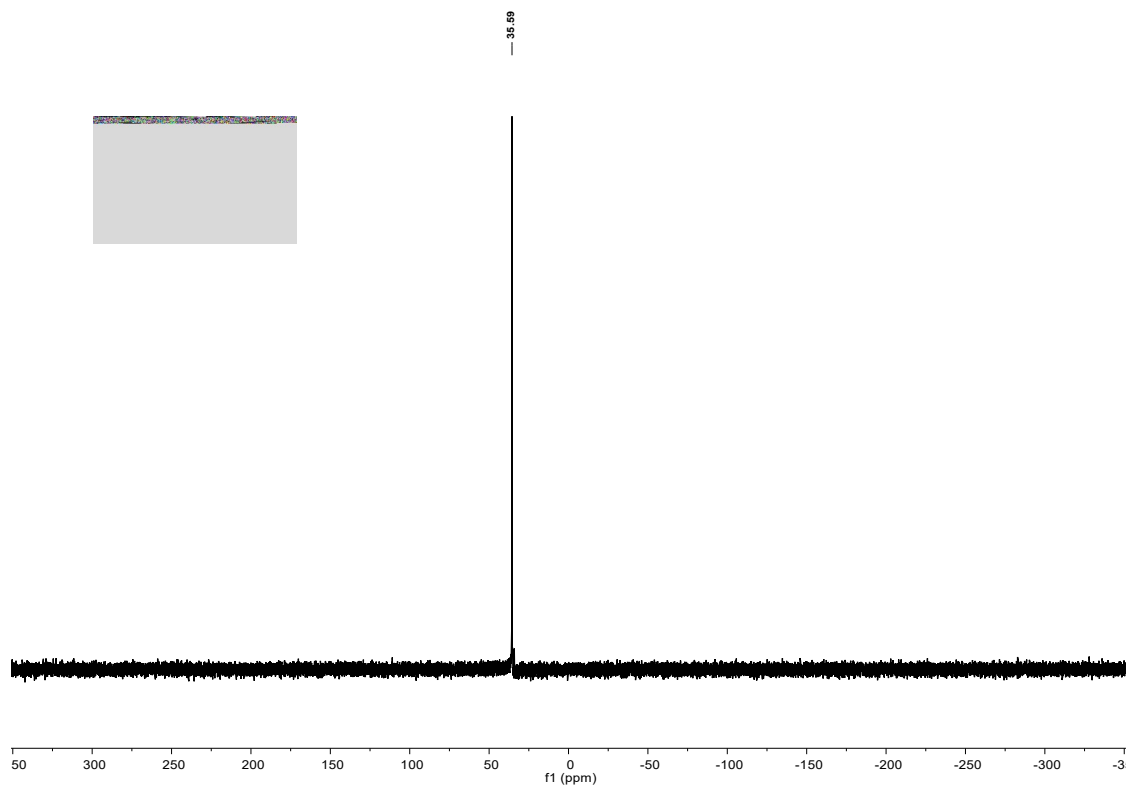

<sup>1</sup>H NMR spectra of 7c

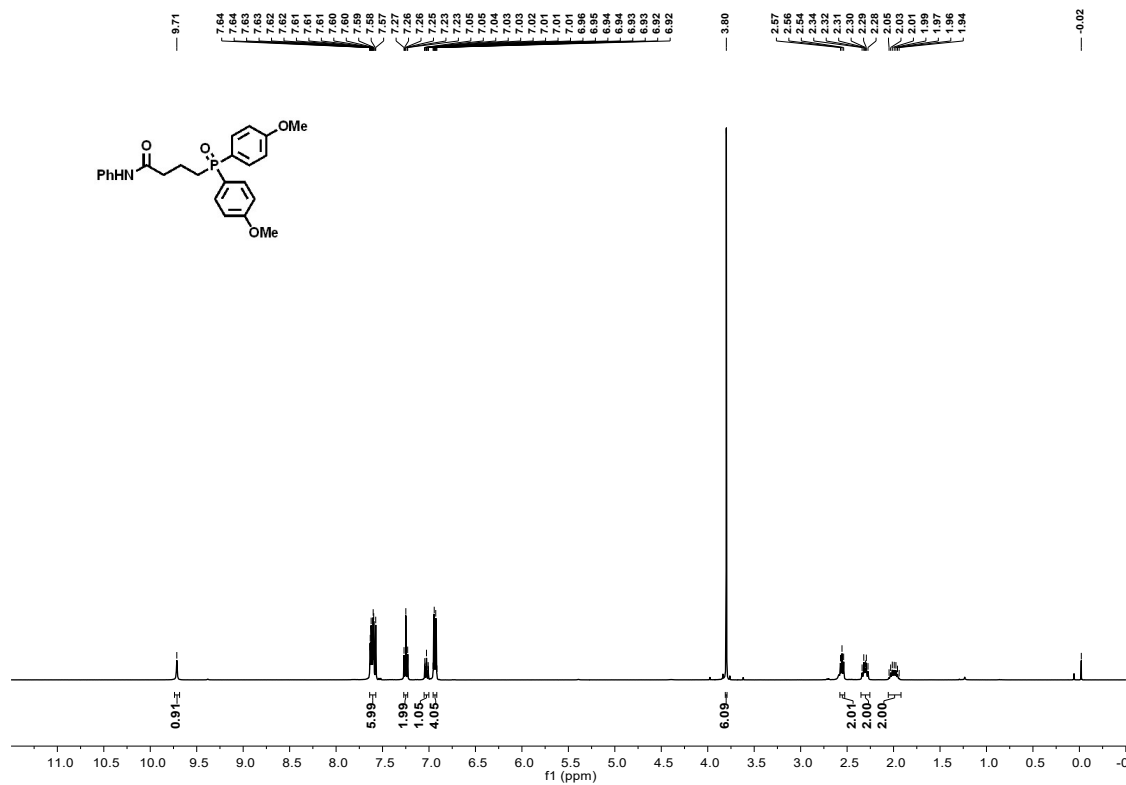

<sup>13</sup>C NMR spectra of 7c

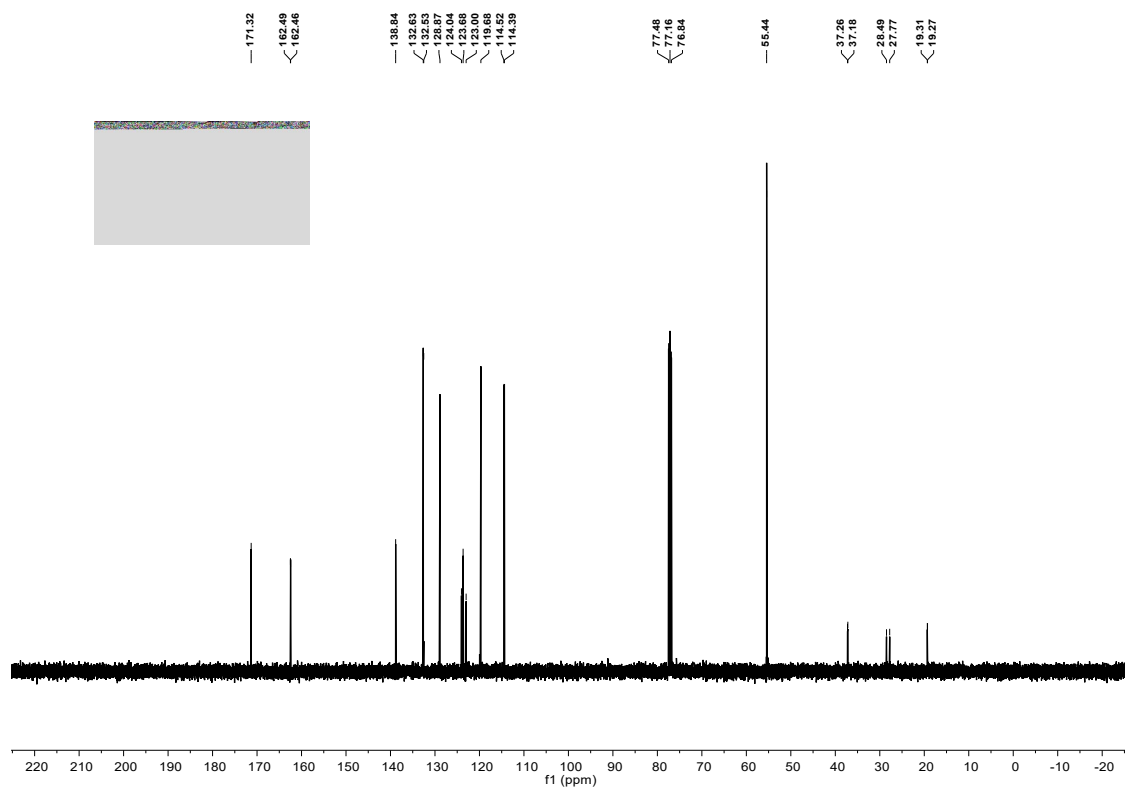

**<sup>31</sup>P NMR spectra of 7c**

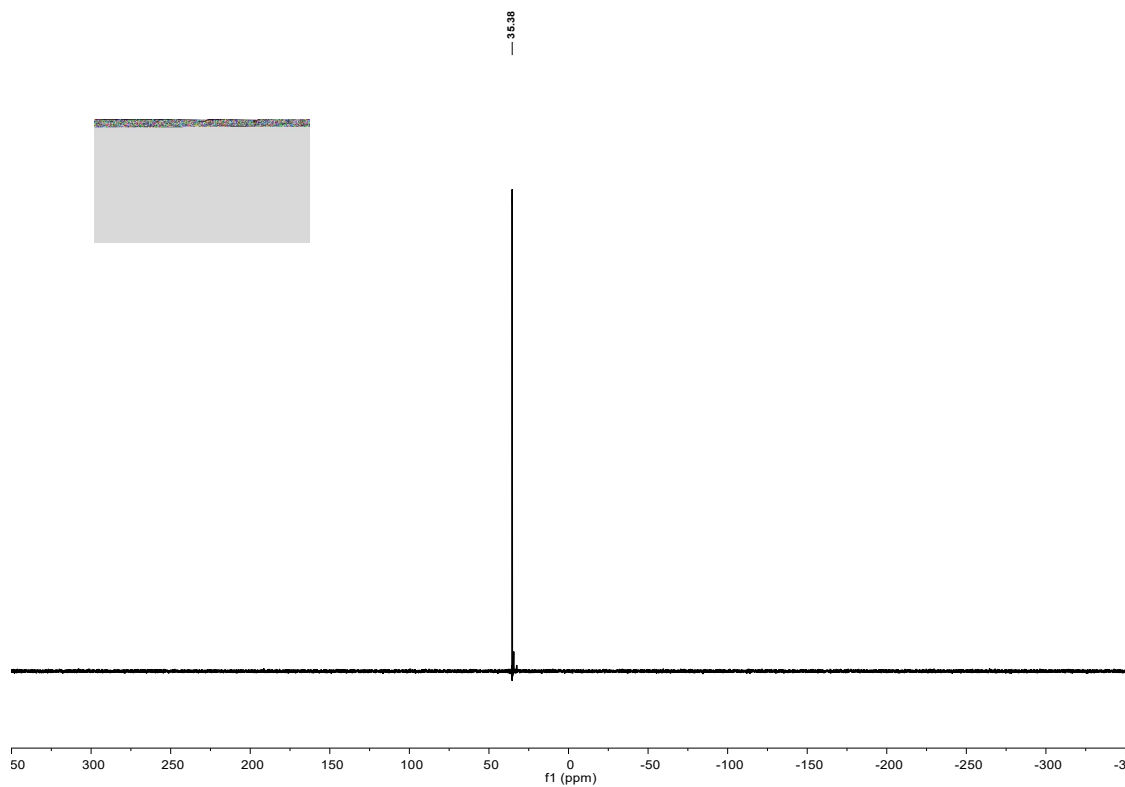

**<sup>1</sup>H NMR spectra of 7d**

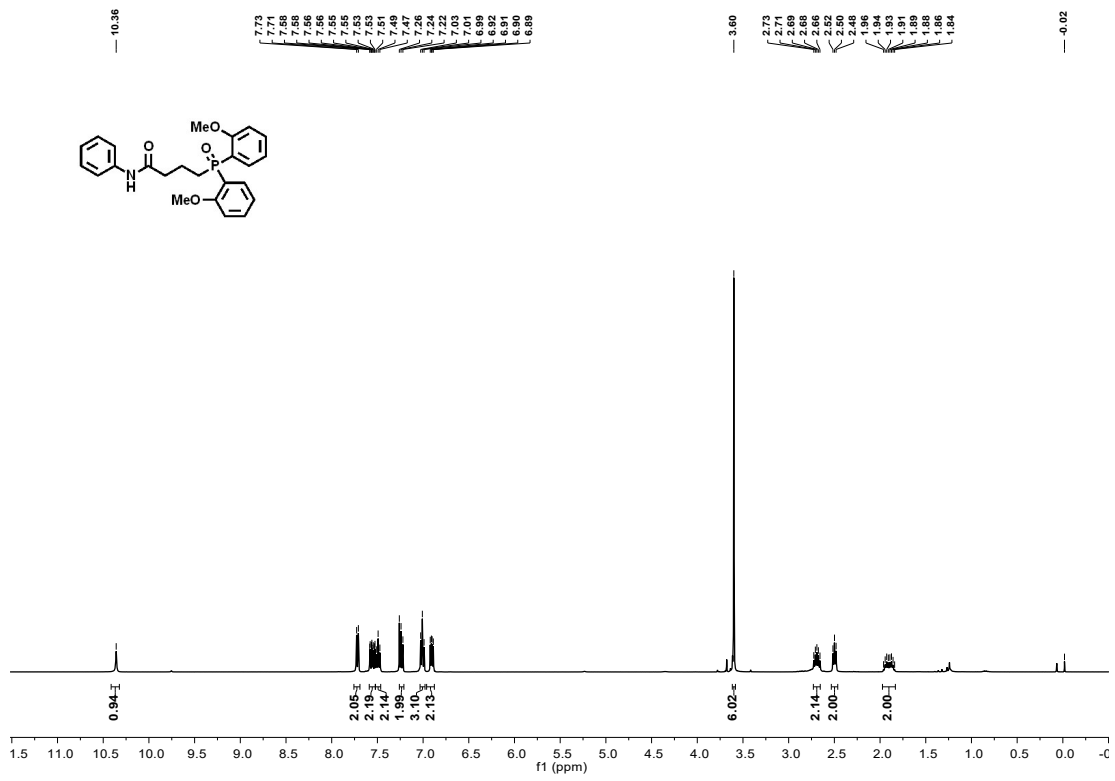

<sup>13</sup>C NMR spectra of 7d

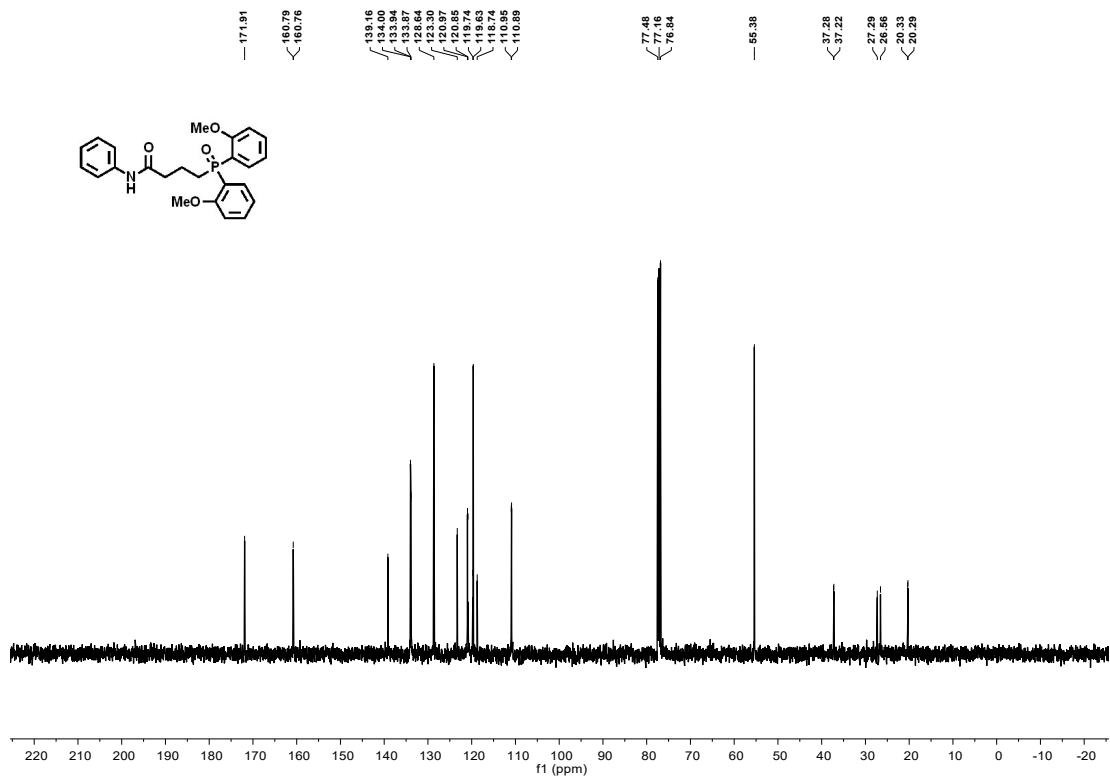

<sup>31</sup>P NMR spectra of 7d

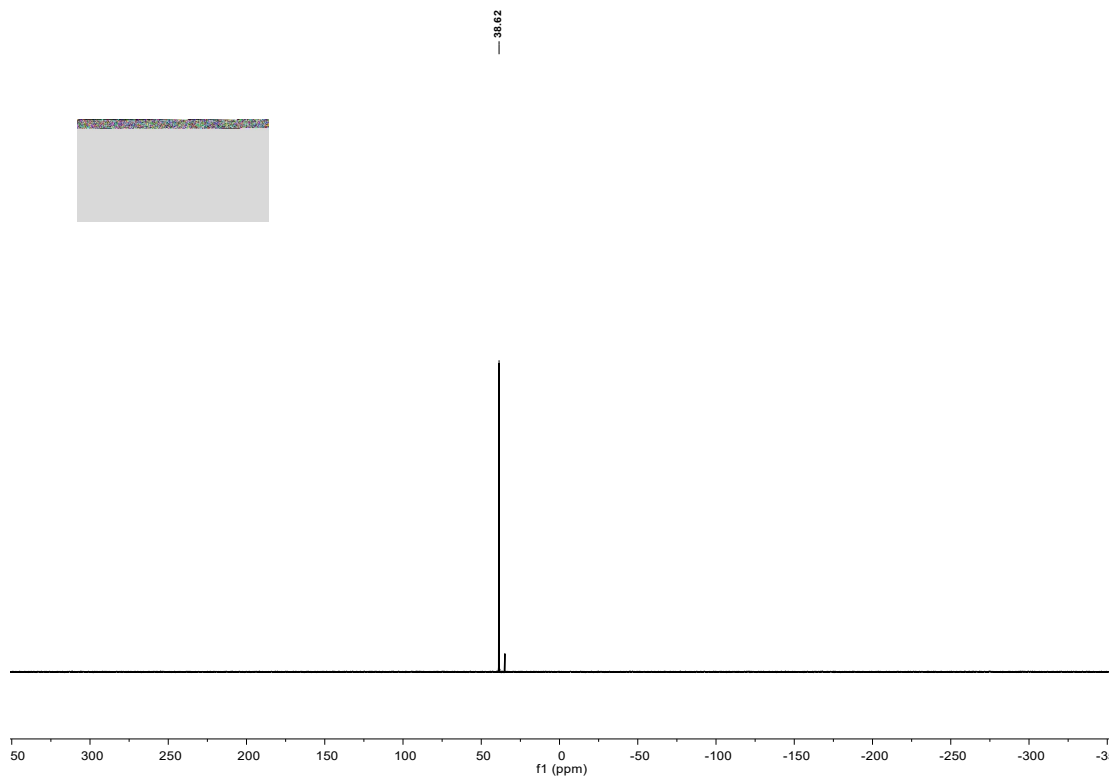

<sup>1</sup>H NMR spectra of 7e

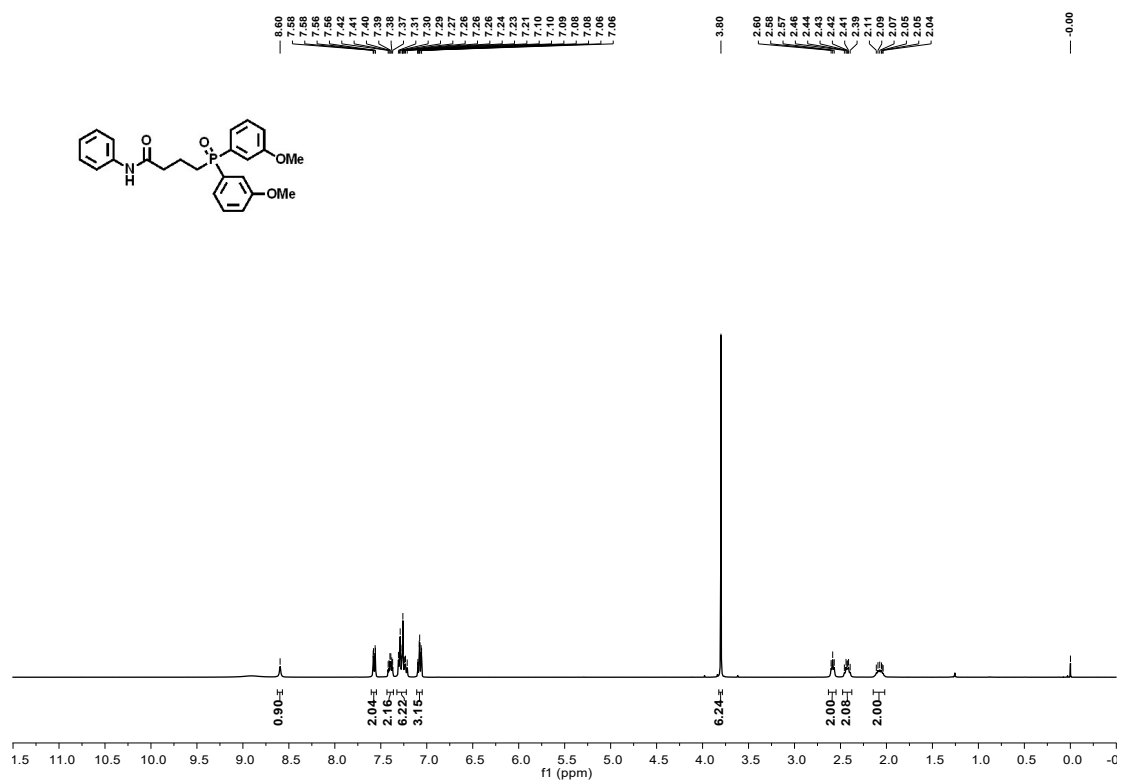

### <sup>13</sup>C NMR spectra of 7e

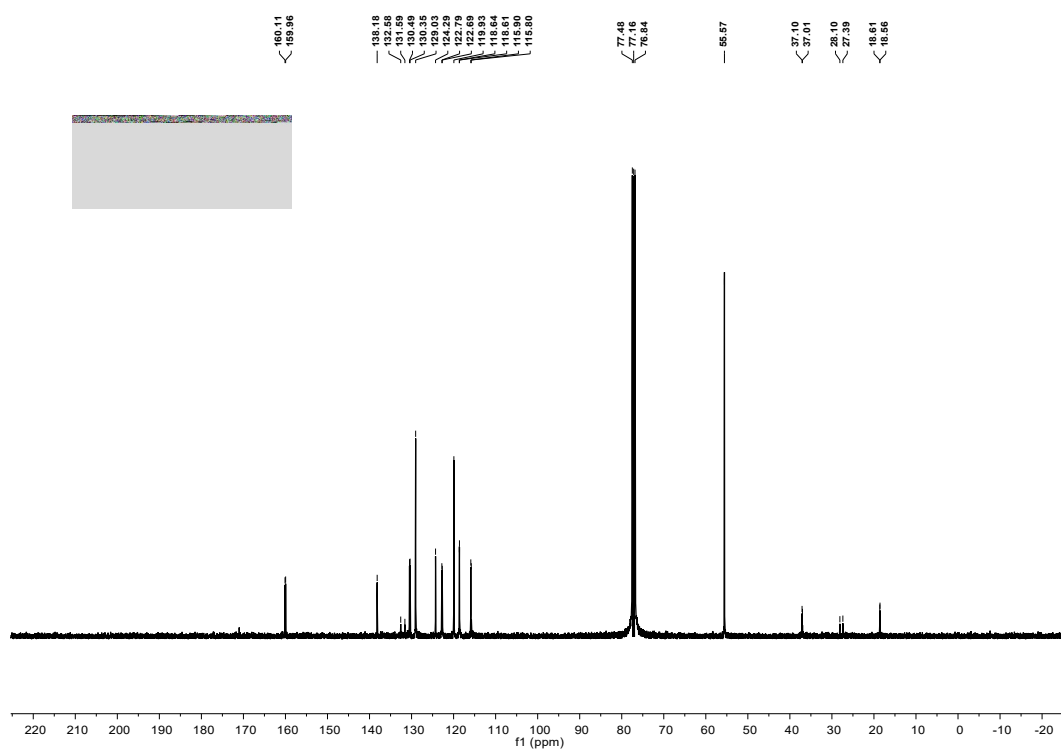

### <sup>31</sup>P NMR spectra of 7e

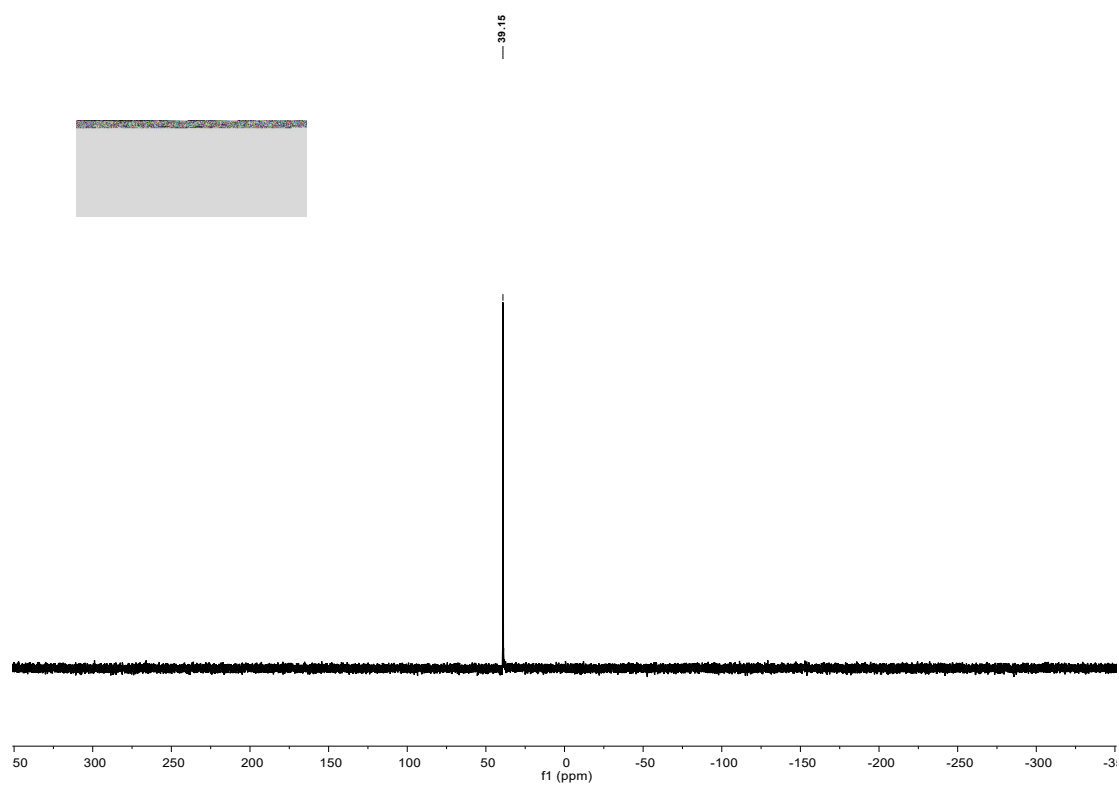

### <sup>1</sup>H NMR spectra of 7f

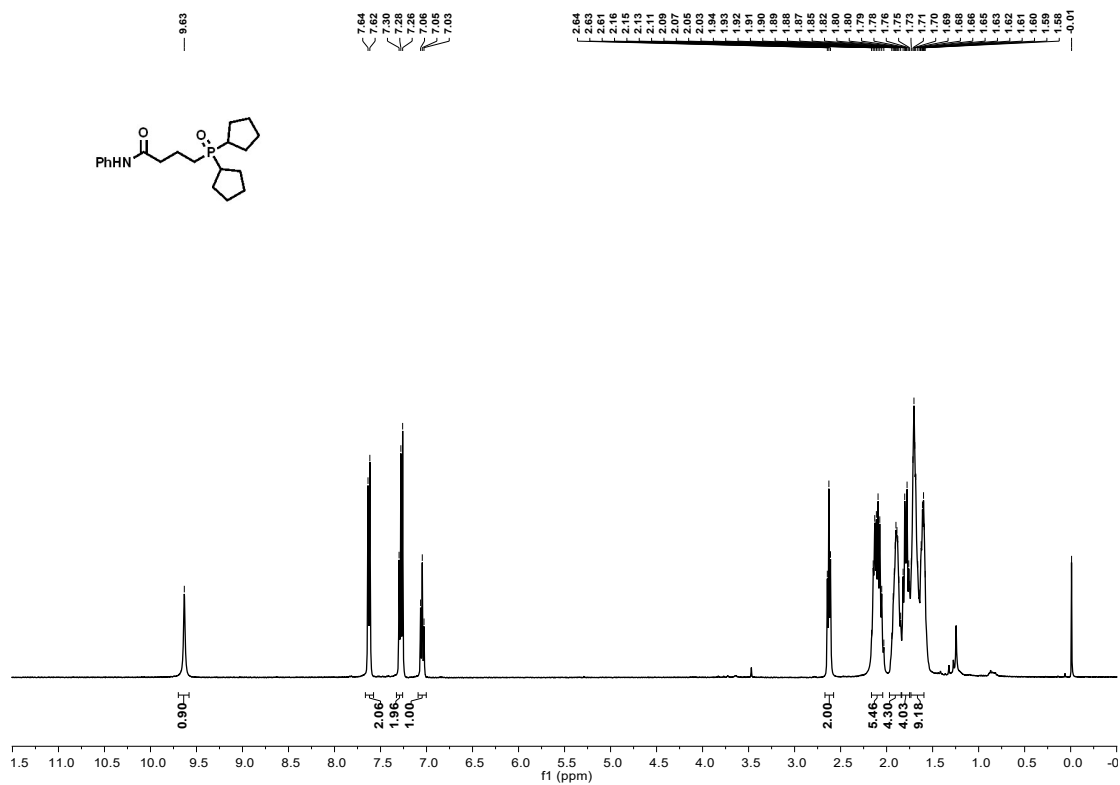

**<sup>13</sup>C NMR spectra of 7f**

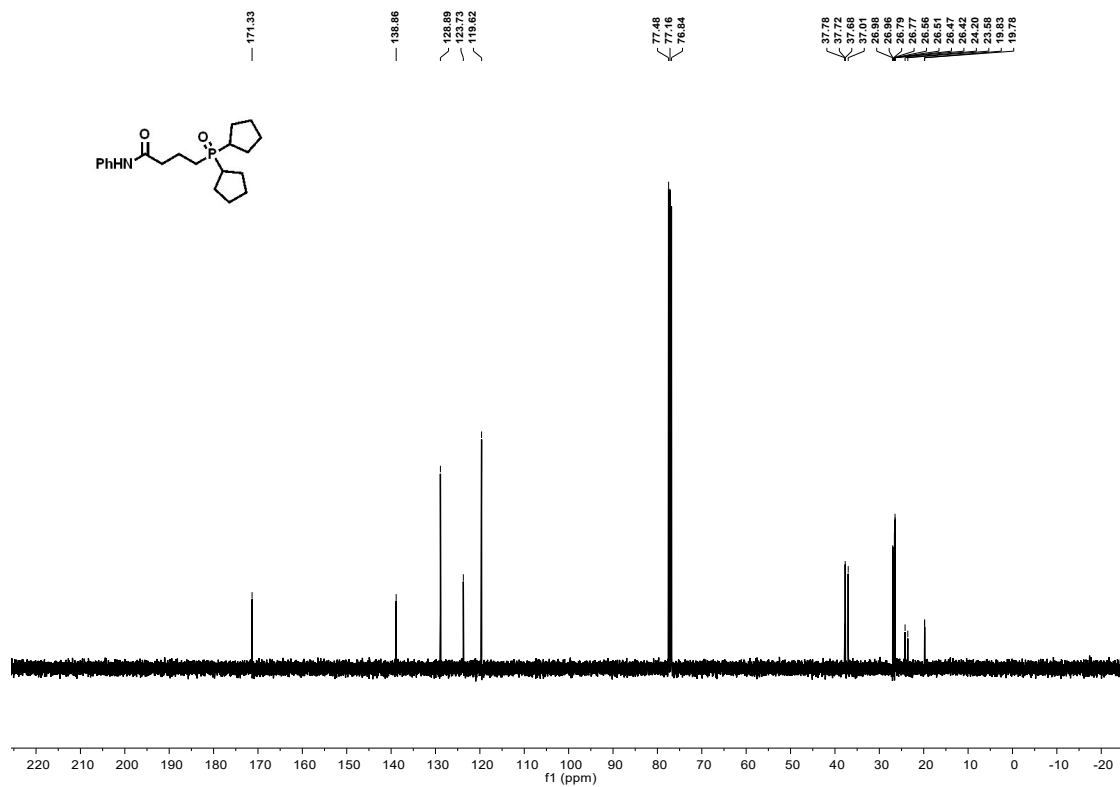

**<sup>31</sup>P NMR spectra of 7f**

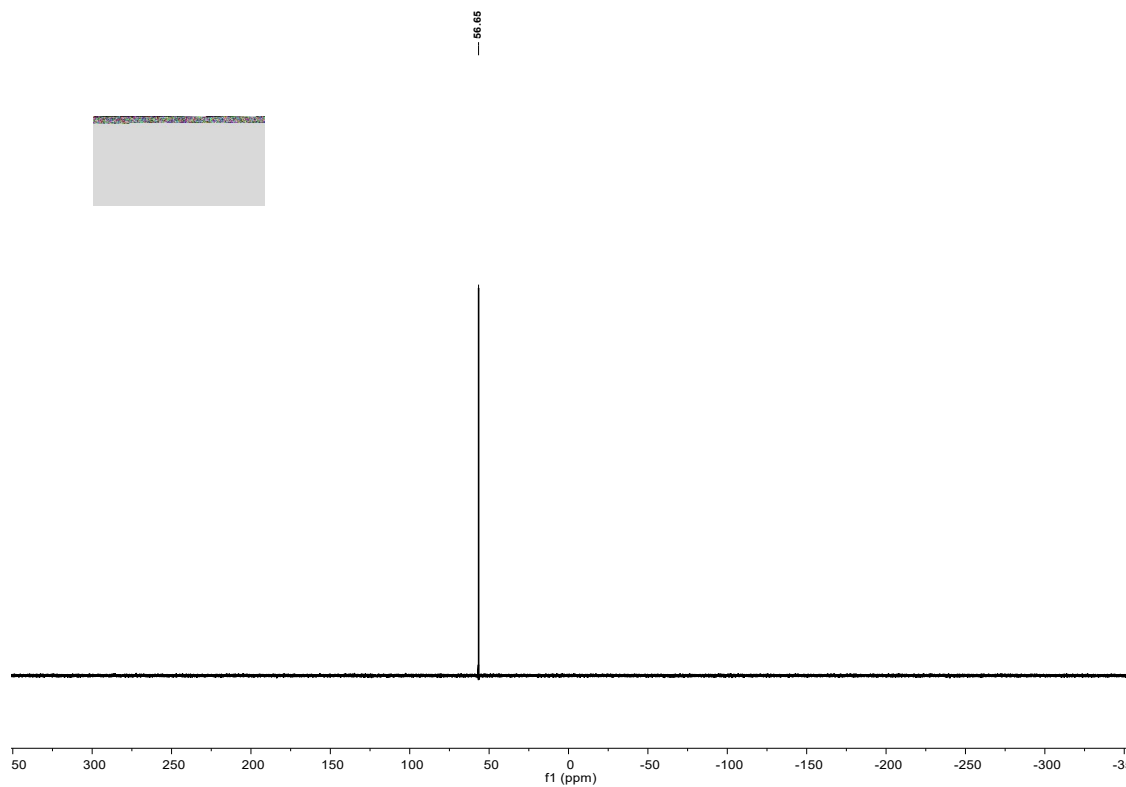

<sup>1</sup>H NMR spectra of 7g

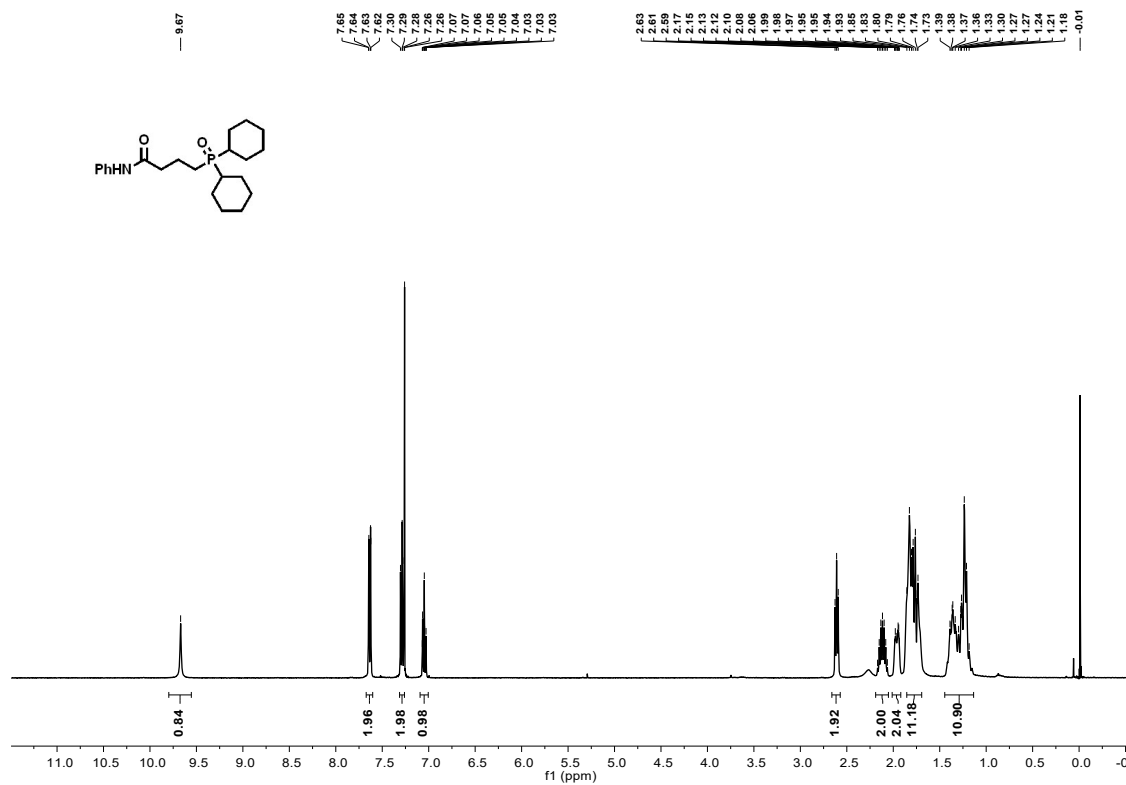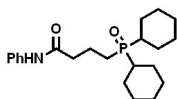

<sup>13</sup>C NMR spectra of 7g

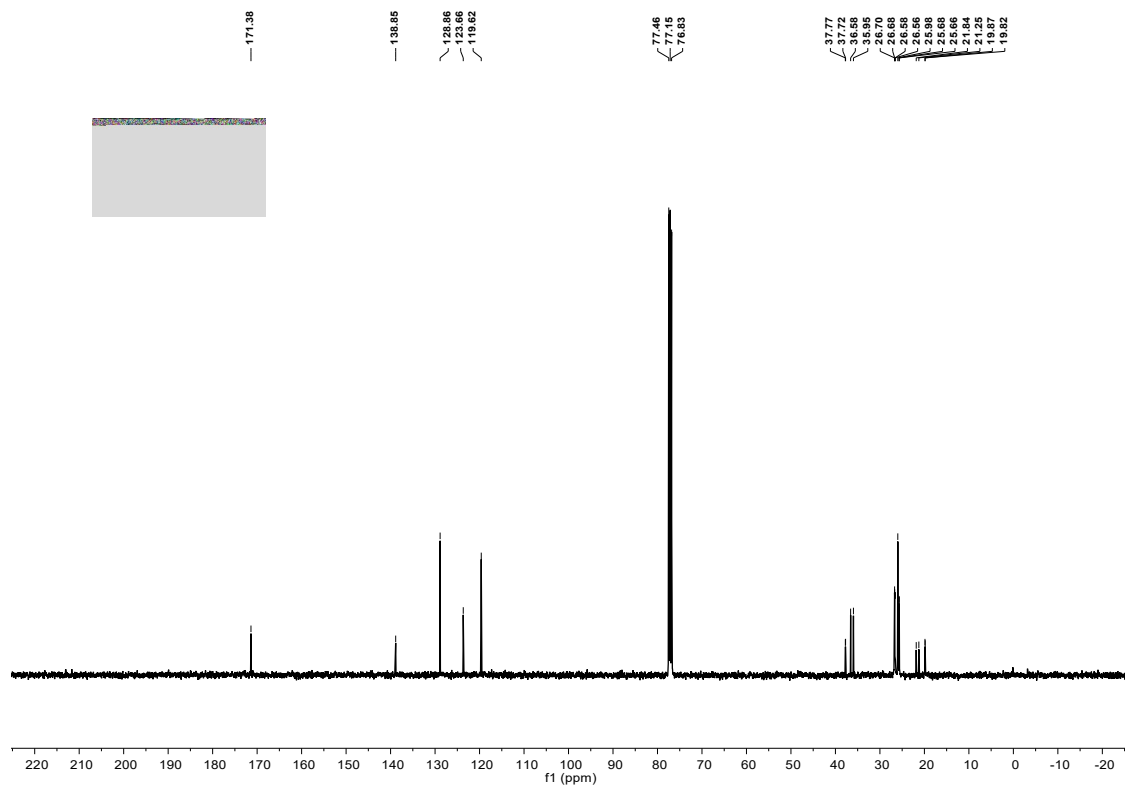

<sup>31</sup>P NMR spectra of **7g**

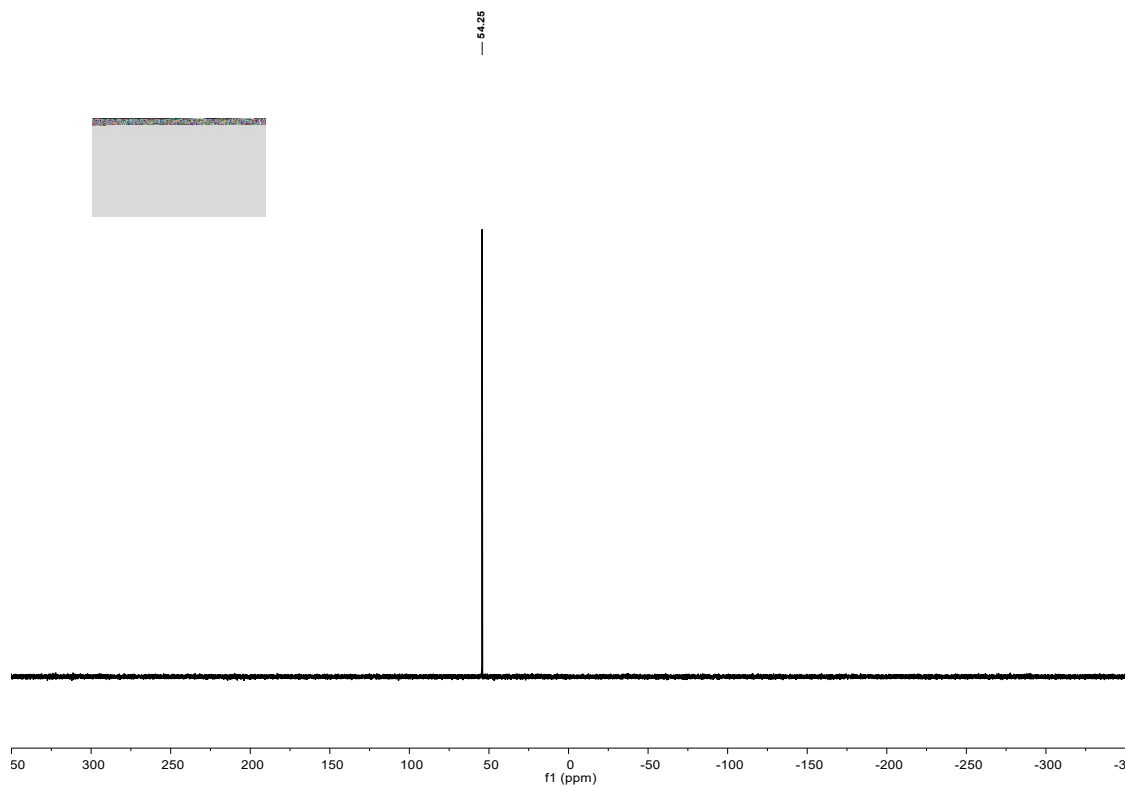

<sup>1</sup>H NMR spectra of **8a**



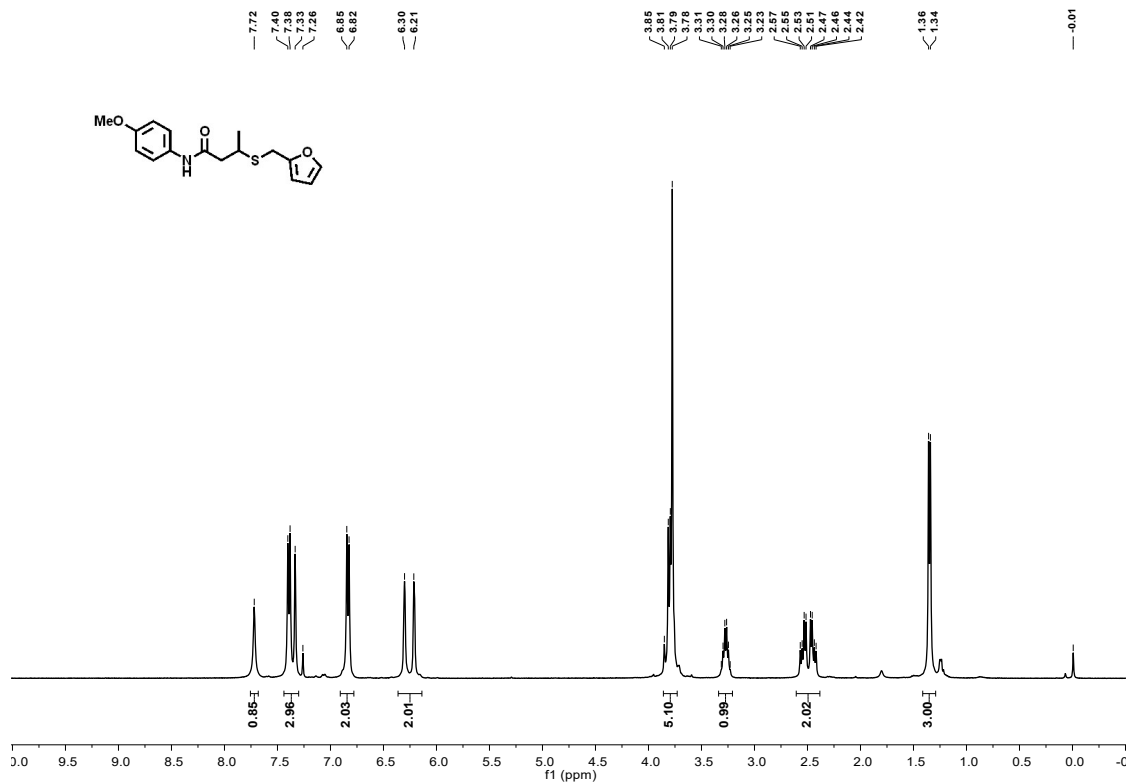

<sup>13</sup>C NMR spectra of 8a

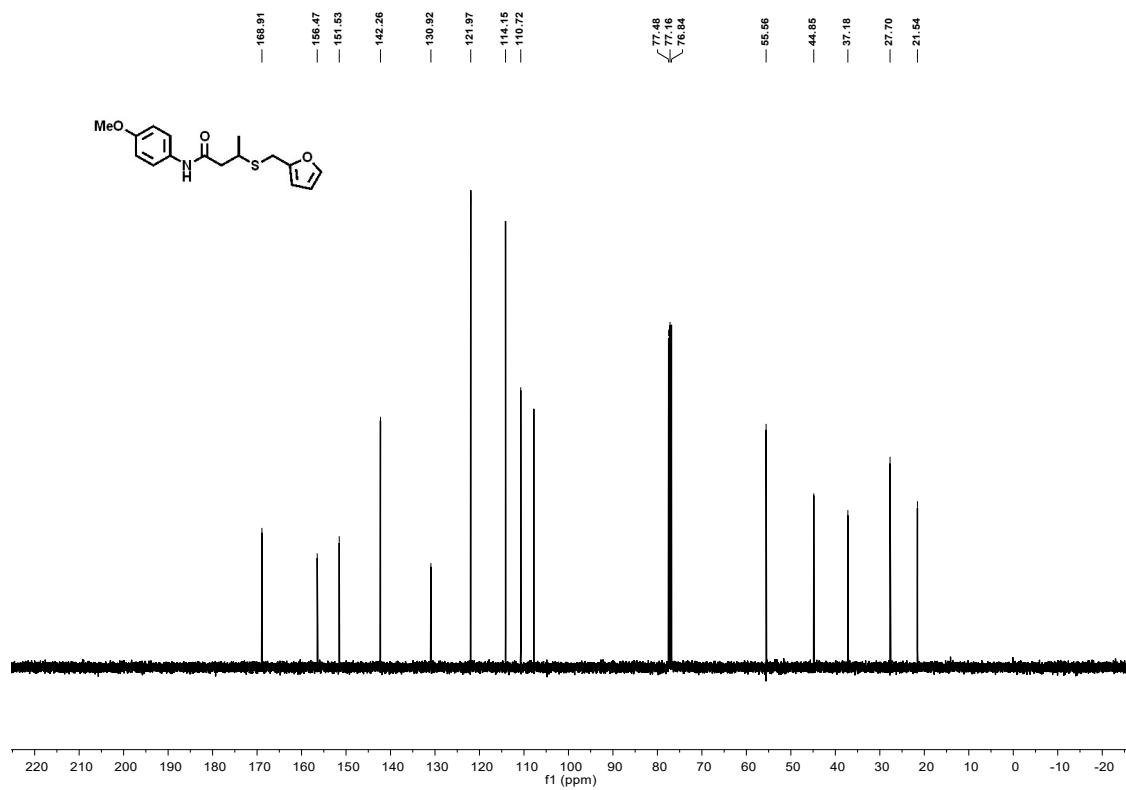

<sup>1</sup>H NMR spectra of 8b

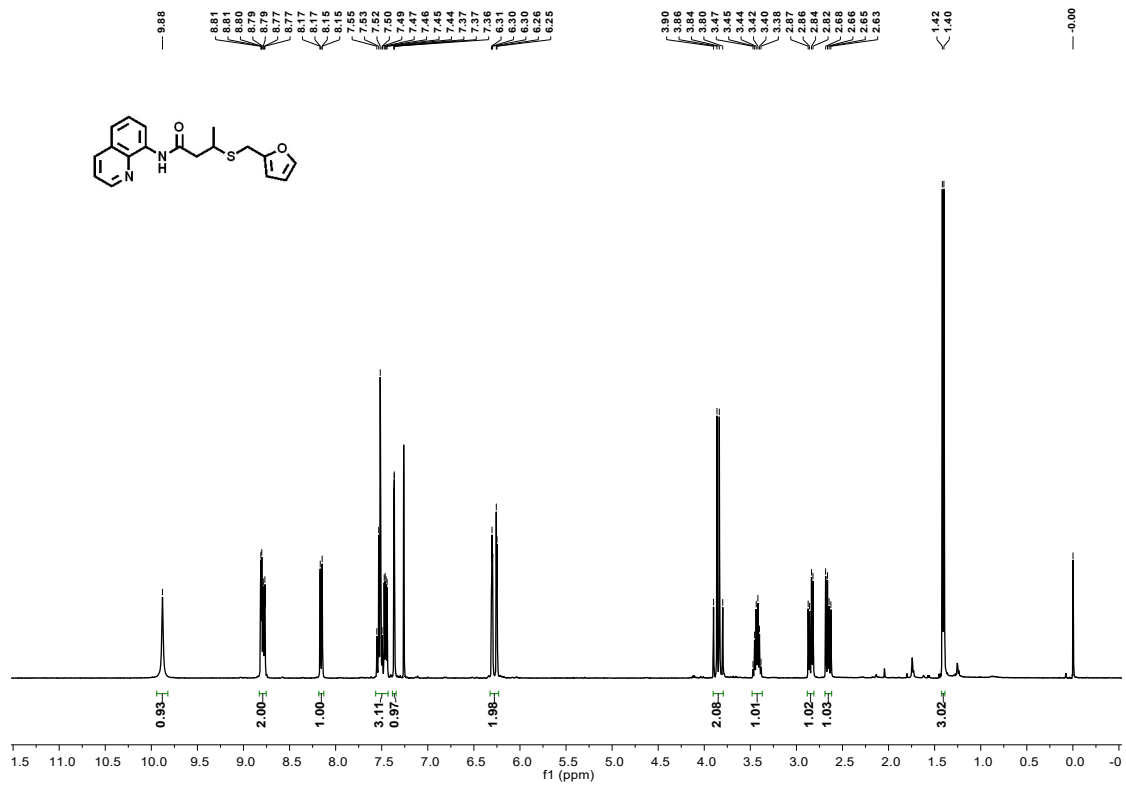

**<sup>13</sup>C NMR spectra of 8b**

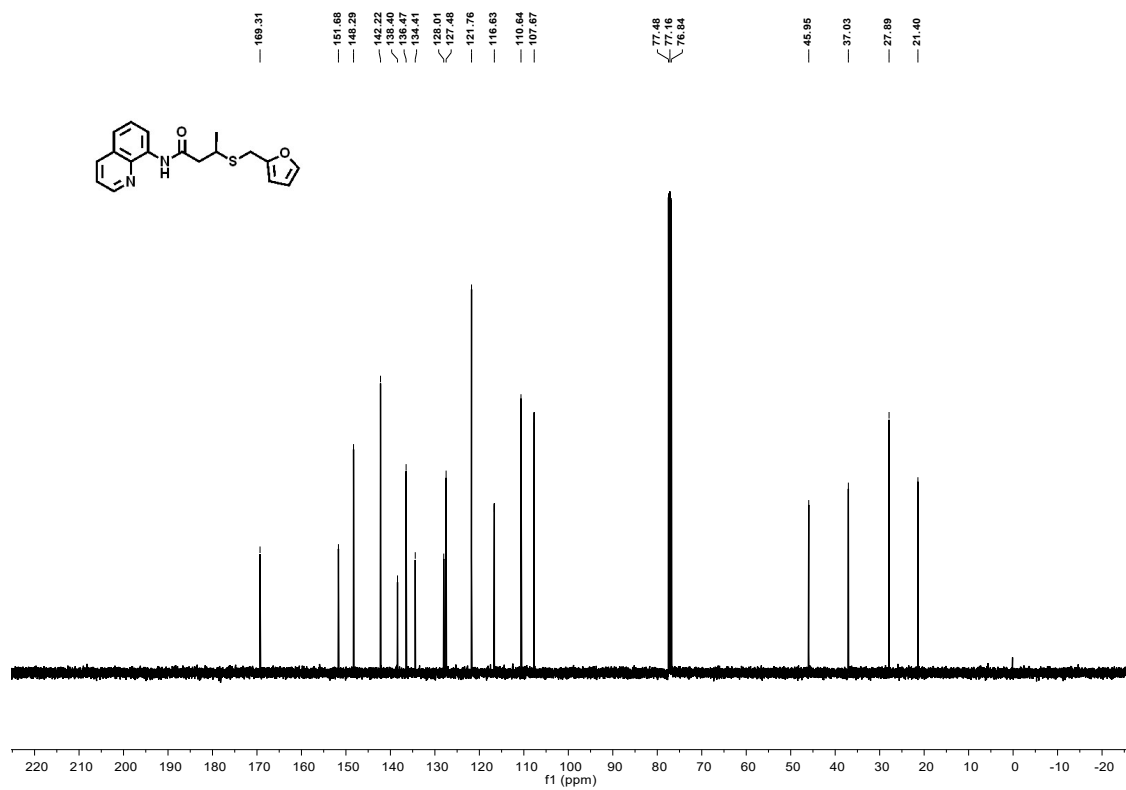

**<sup>1</sup>H NMR spectra of 8c**

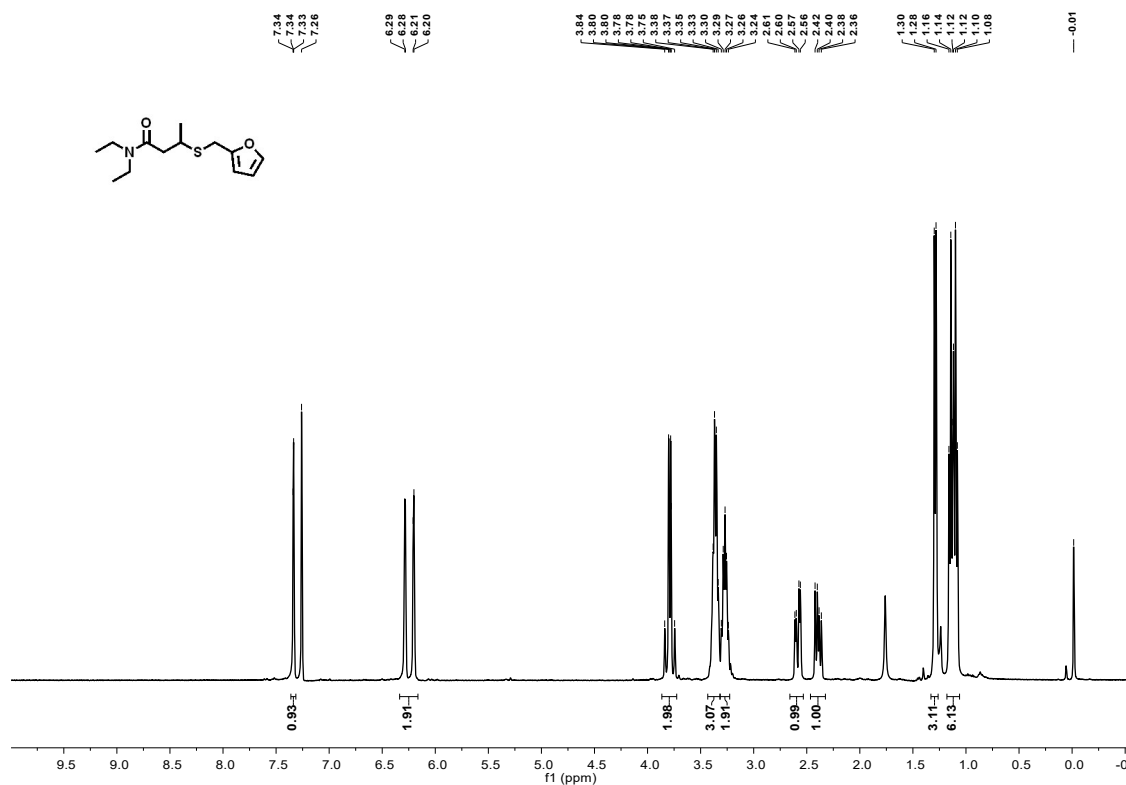

**<sup>13</sup>C NMR spectra of 8c**

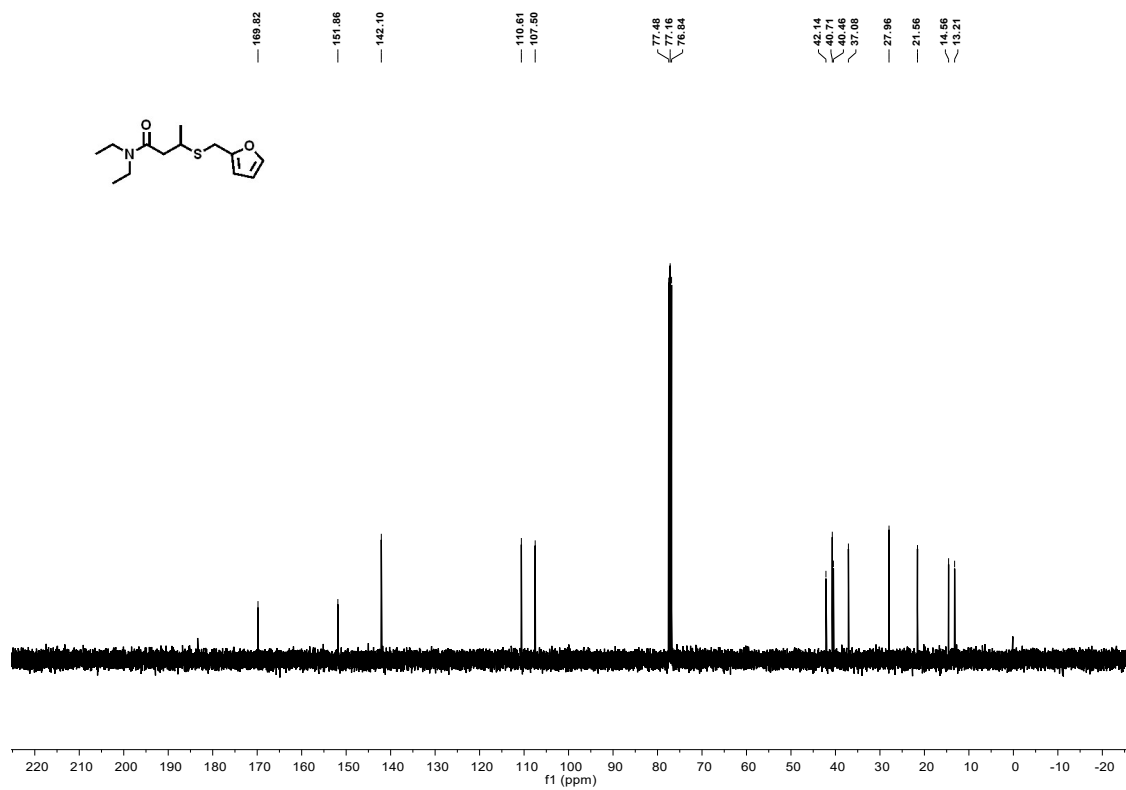

**<sup>1</sup>H NMR spectra of 8d**

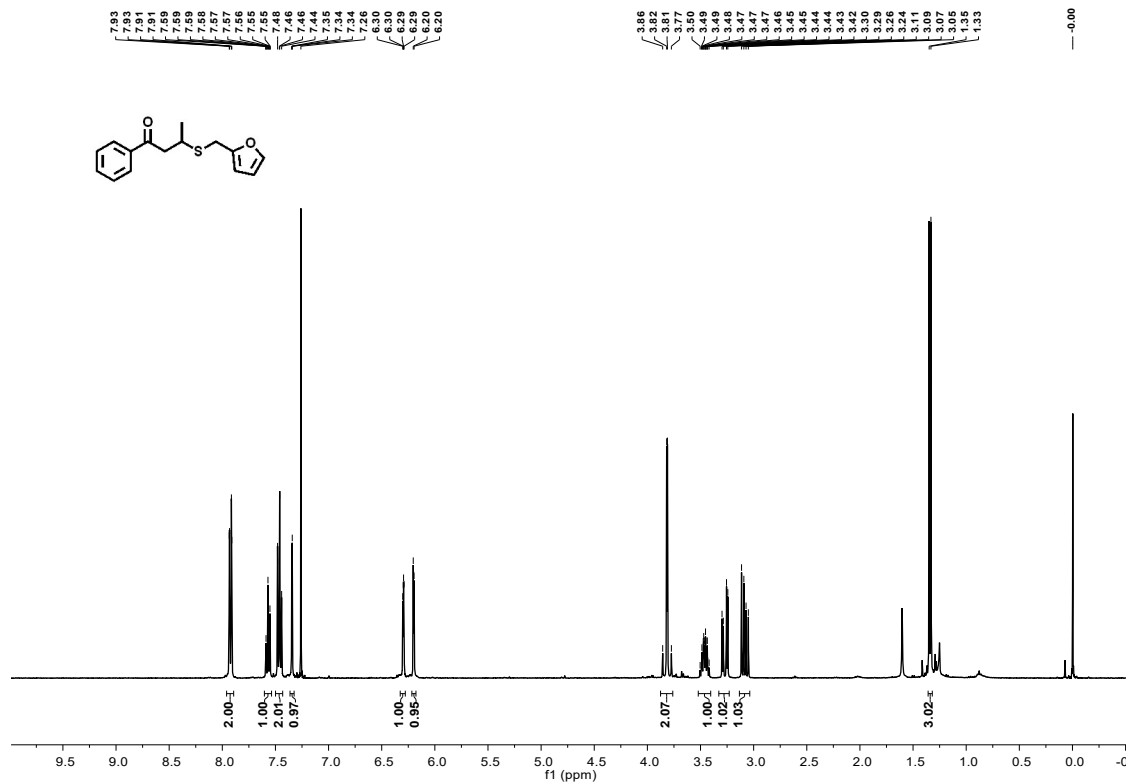

<sup>13</sup>C NMR spectra of 8d

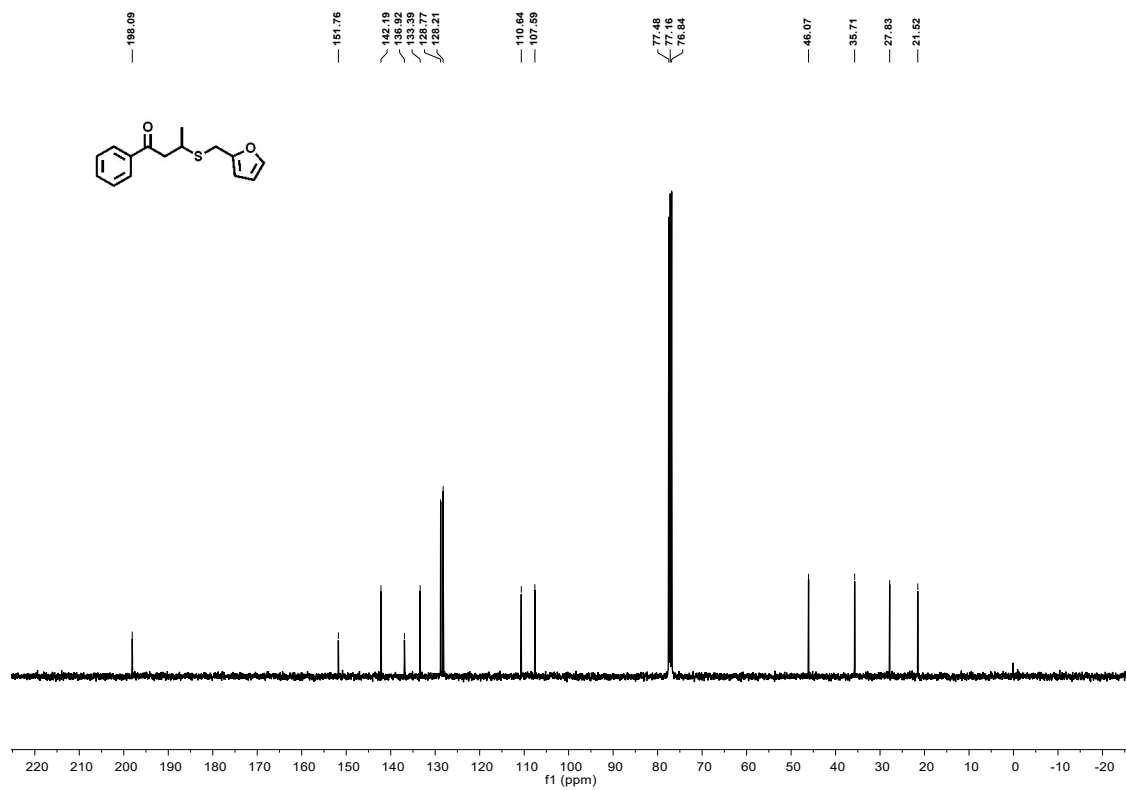

### <sup>1</sup>H NMR spectra of 8e

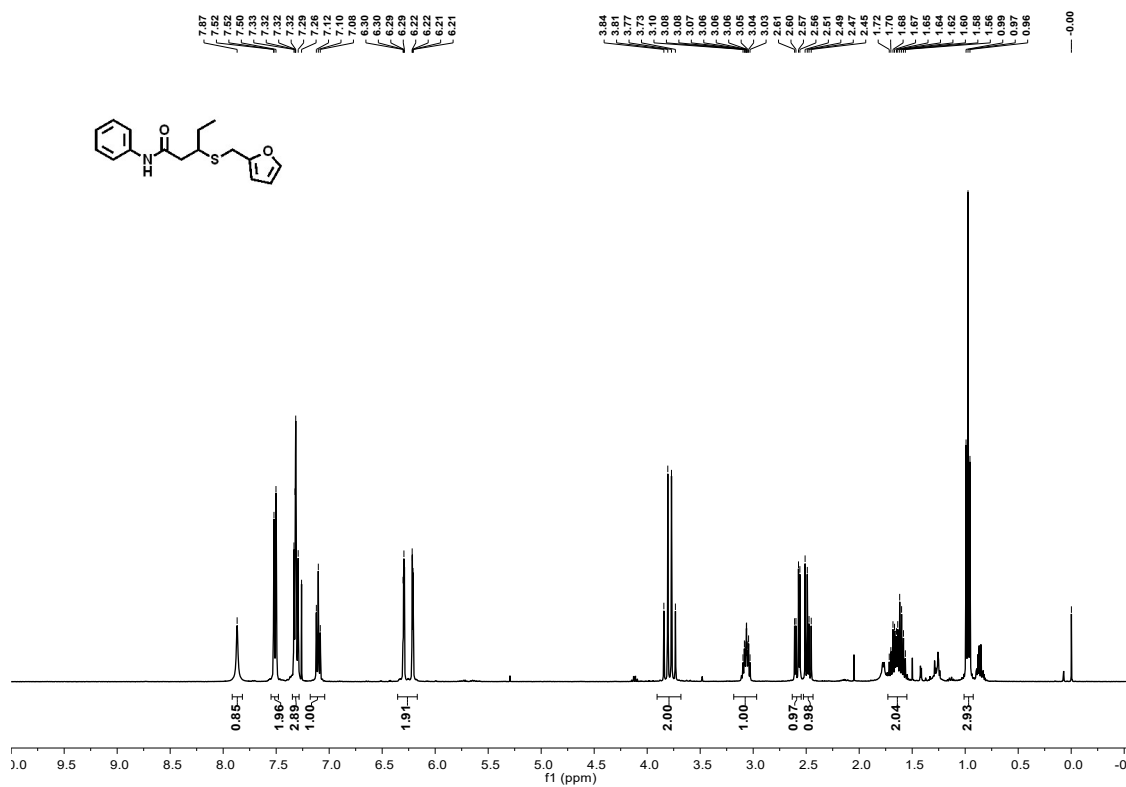

### <sup>13</sup>C NMR spectra of 8e

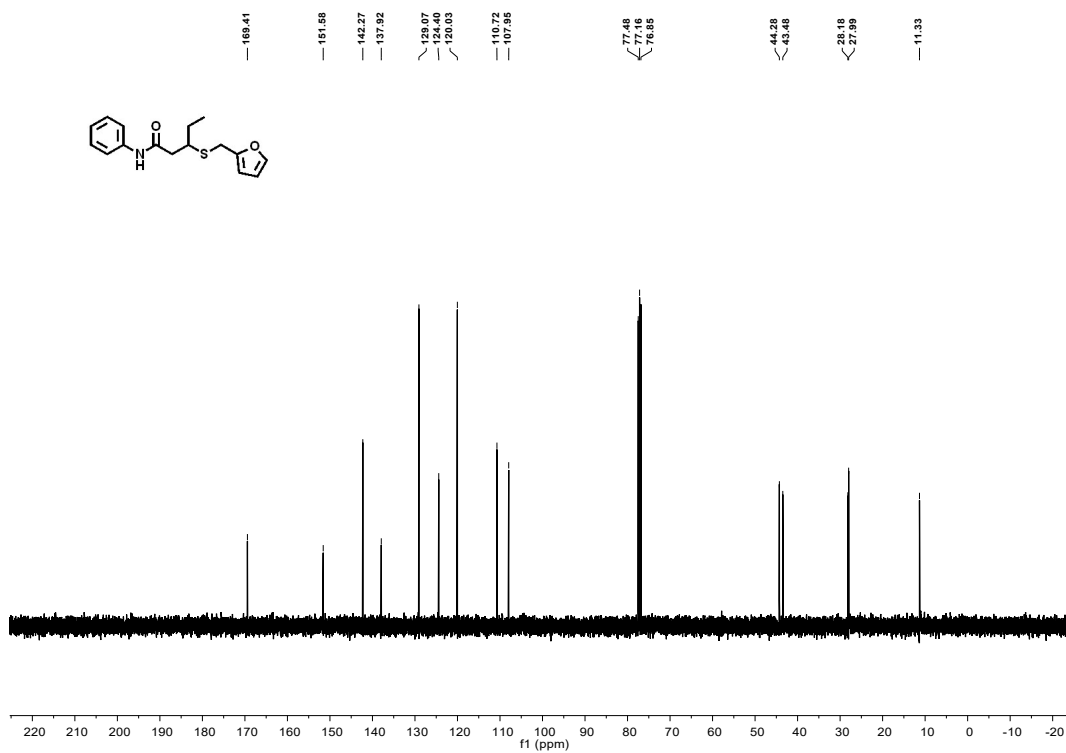

### <sup>1</sup>H NMR spectra of 8f

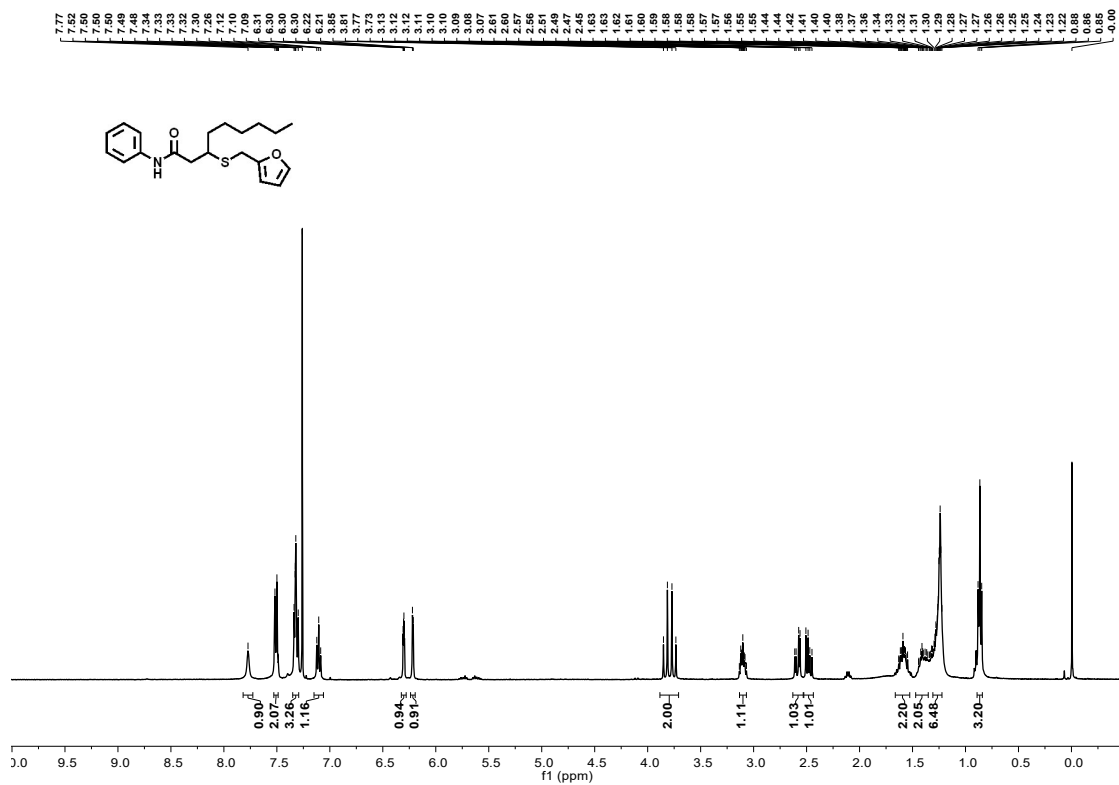

**<sup>13</sup>C NMR spectra of 8f**

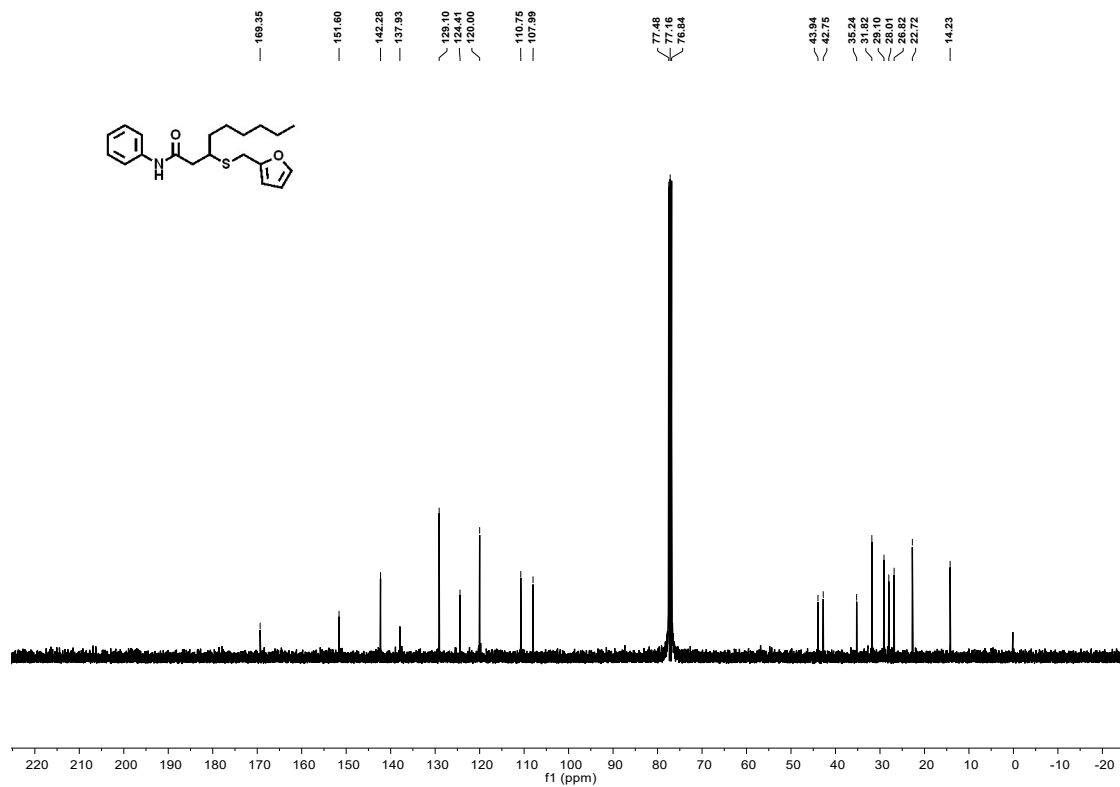

**<sup>1</sup>H NMR spectra of 8g**

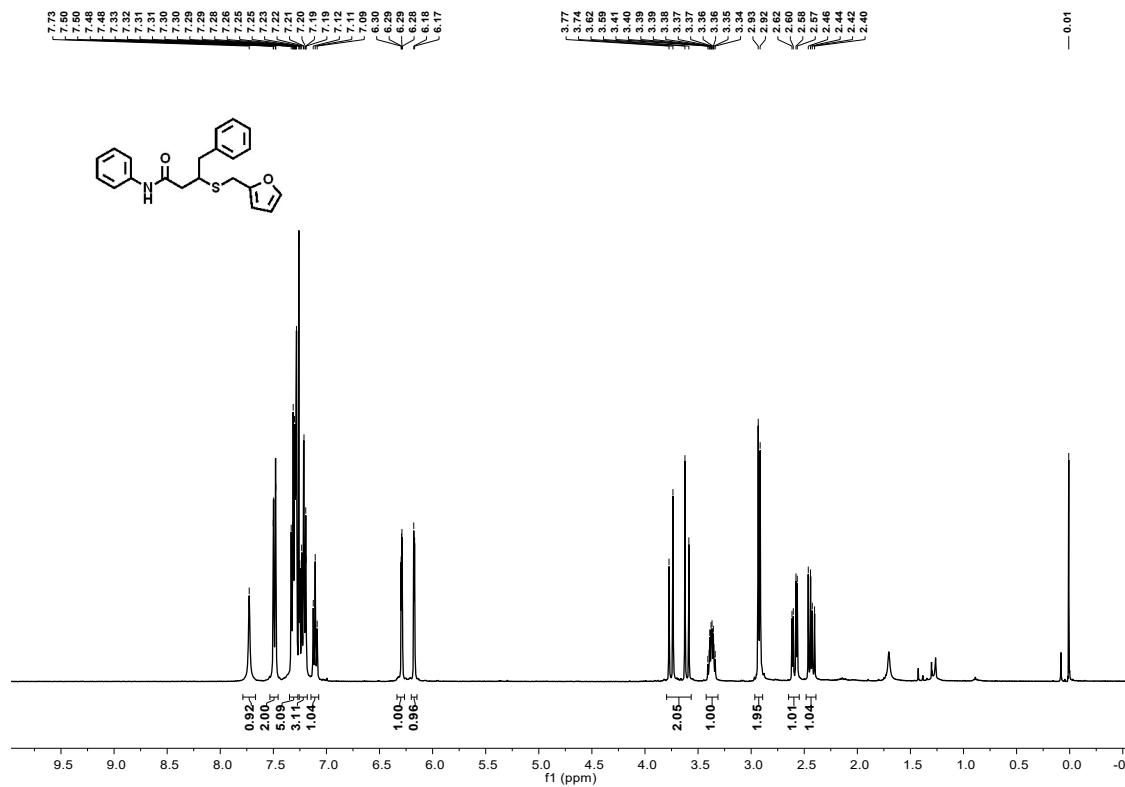

**<sup>13</sup>C NMR spectra of 8g**

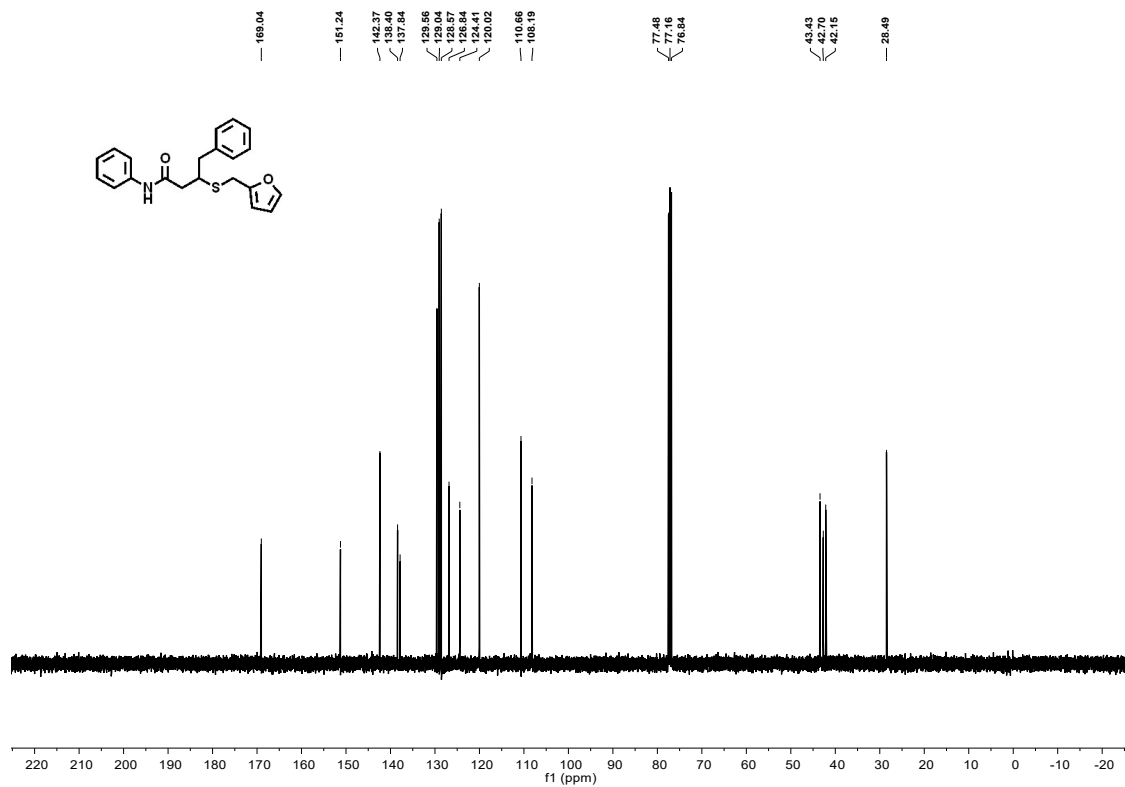

**<sup>1</sup>H NMR spectra of 8h**

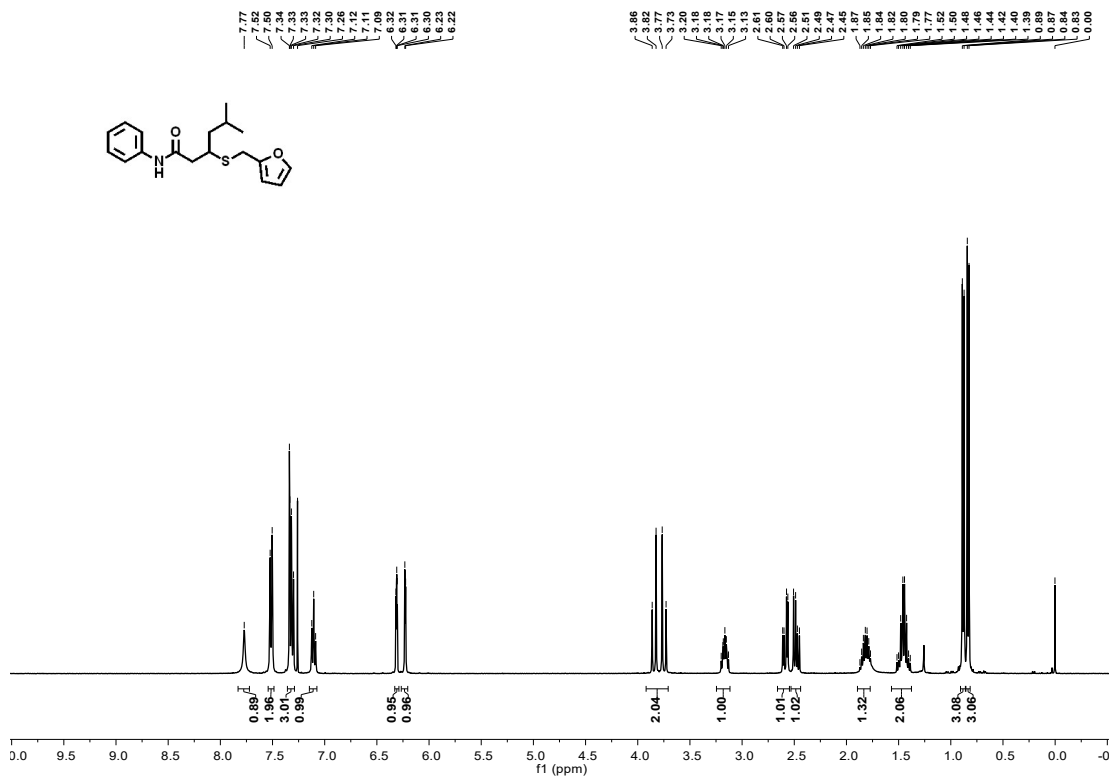

<sup>13</sup>C NMR spectra of 8h

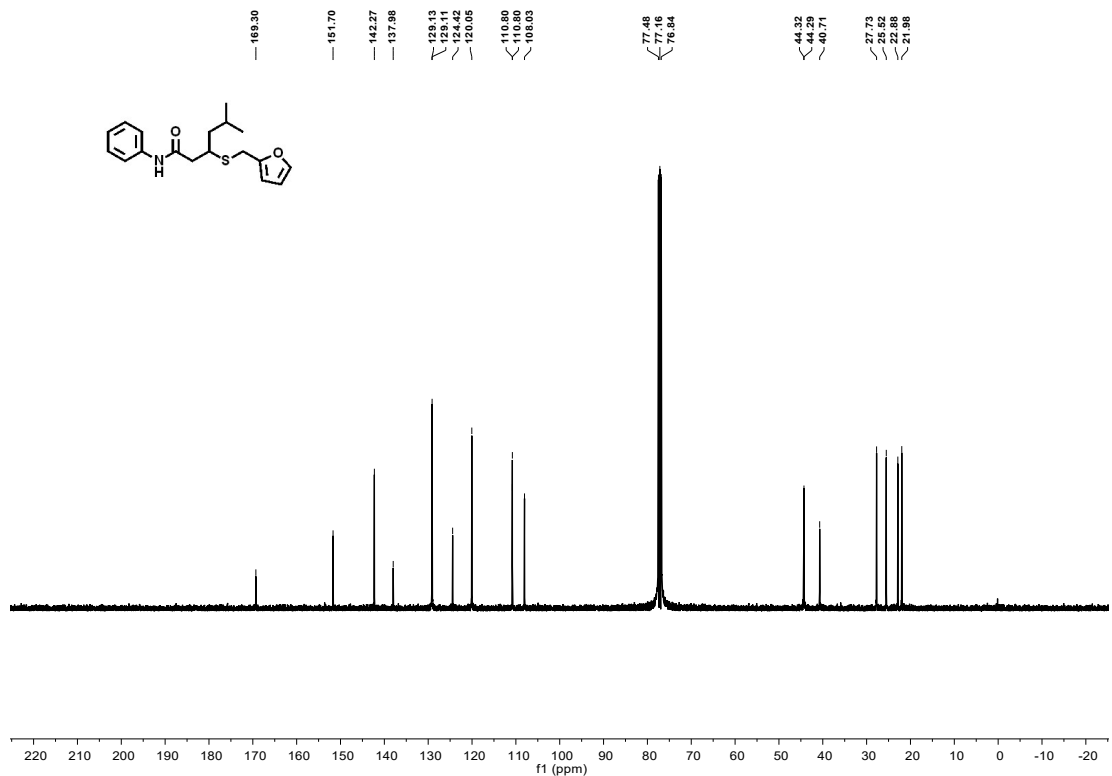

<sup>1</sup>H NMR spectra of 8i





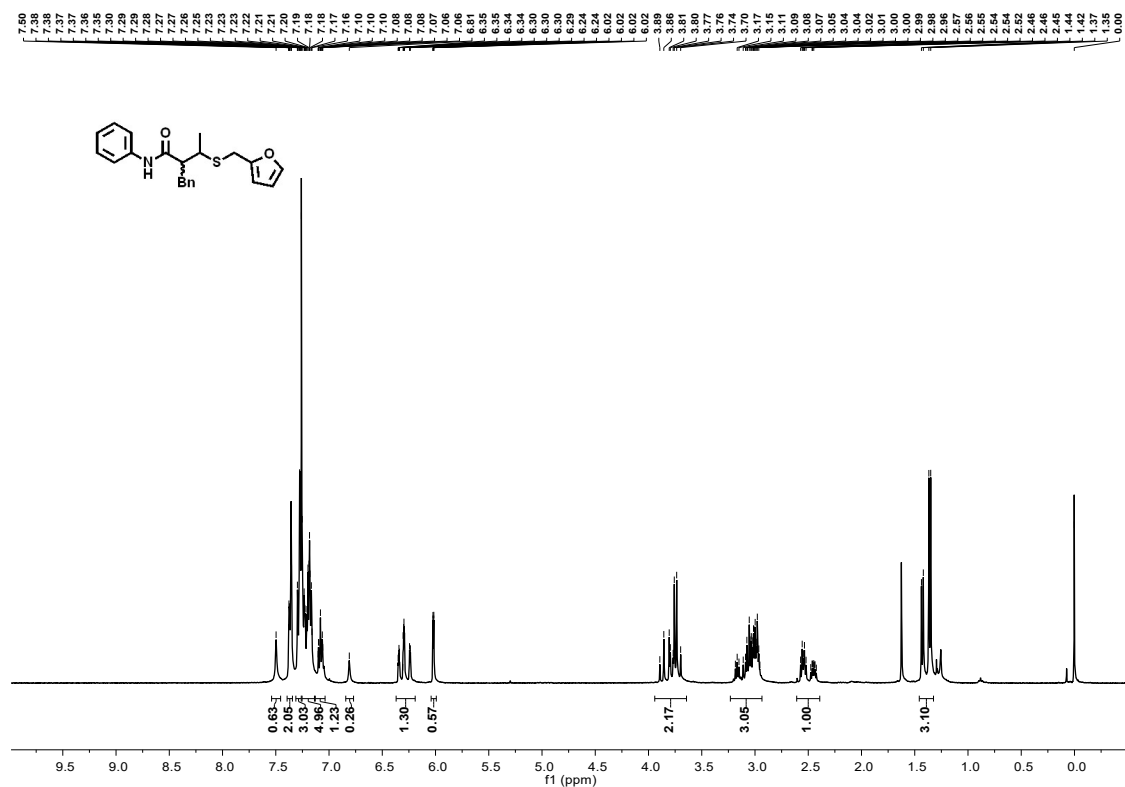

<sup>13</sup>C NMR spectra of **8j**

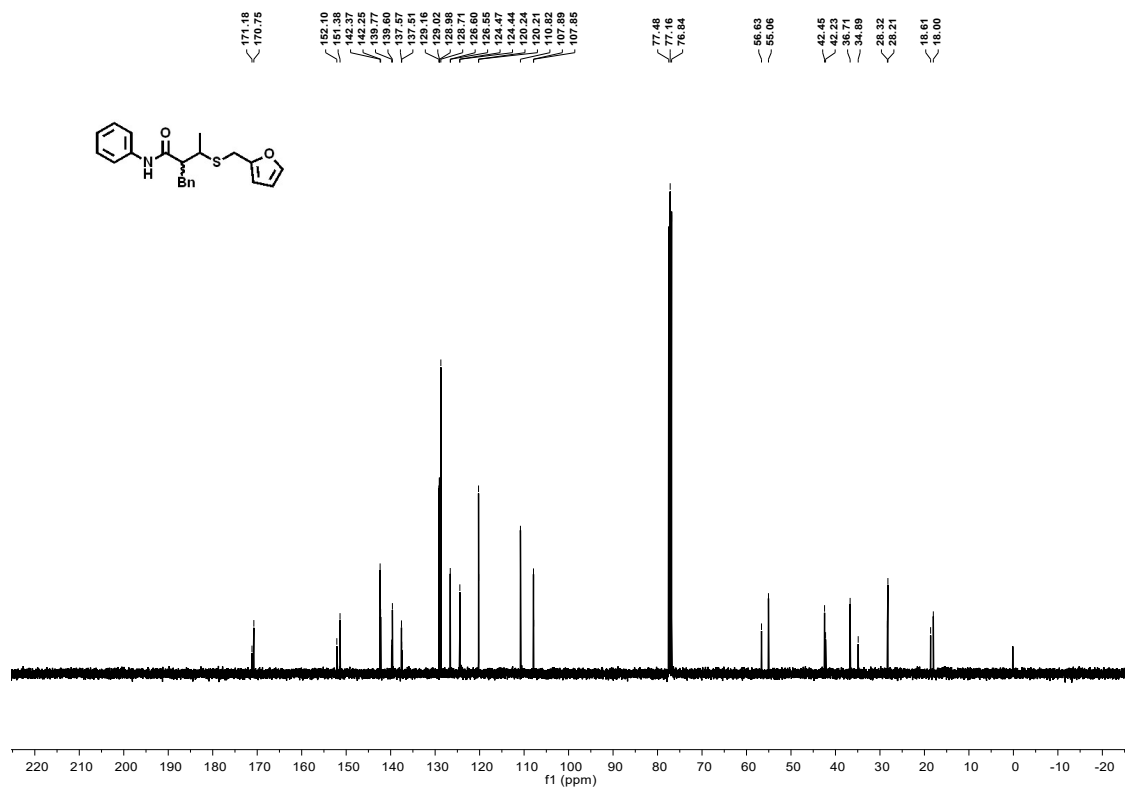

<sup>1</sup>H NMR spectra of **8k**

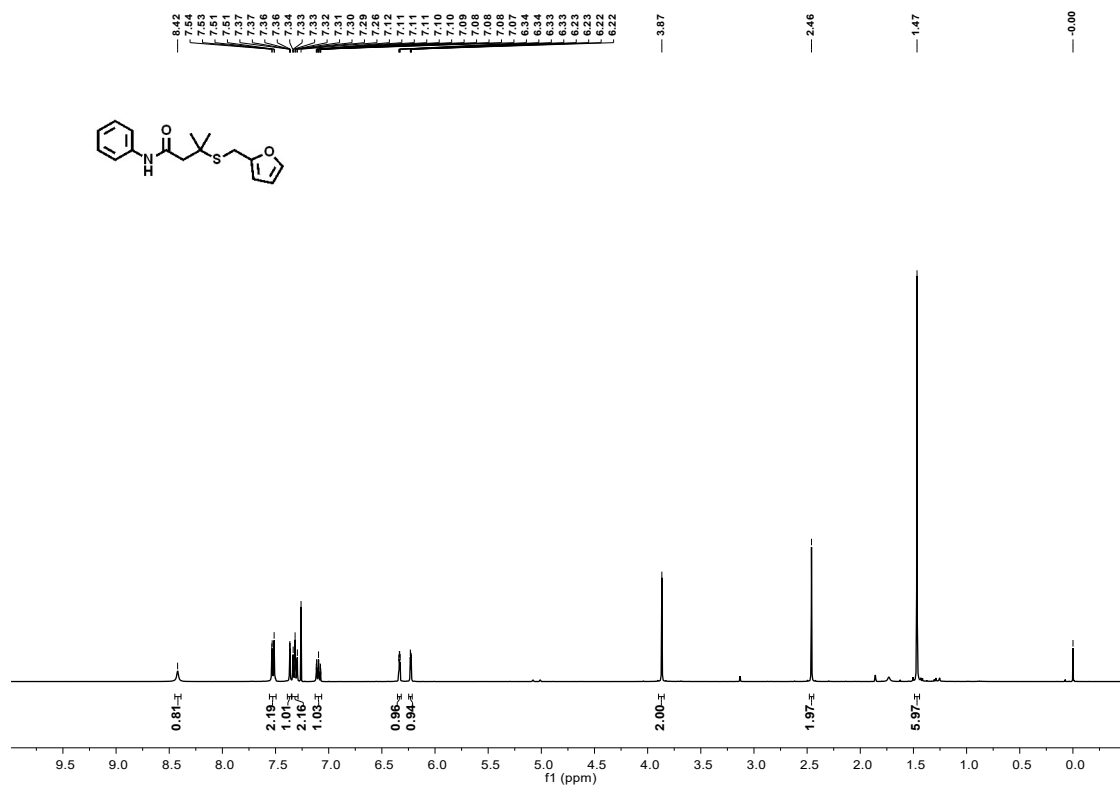

<sup>13</sup>C NMR spectra of 8k

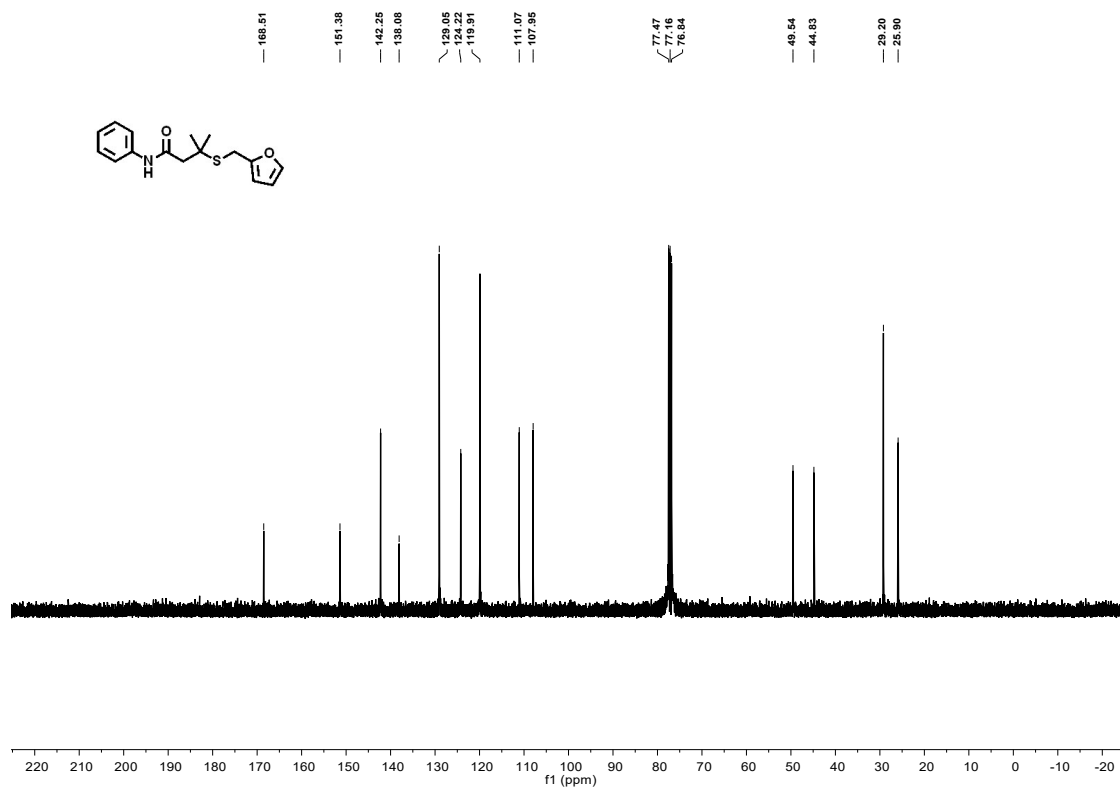

<sup>1</sup>H NMR spectra of 8l

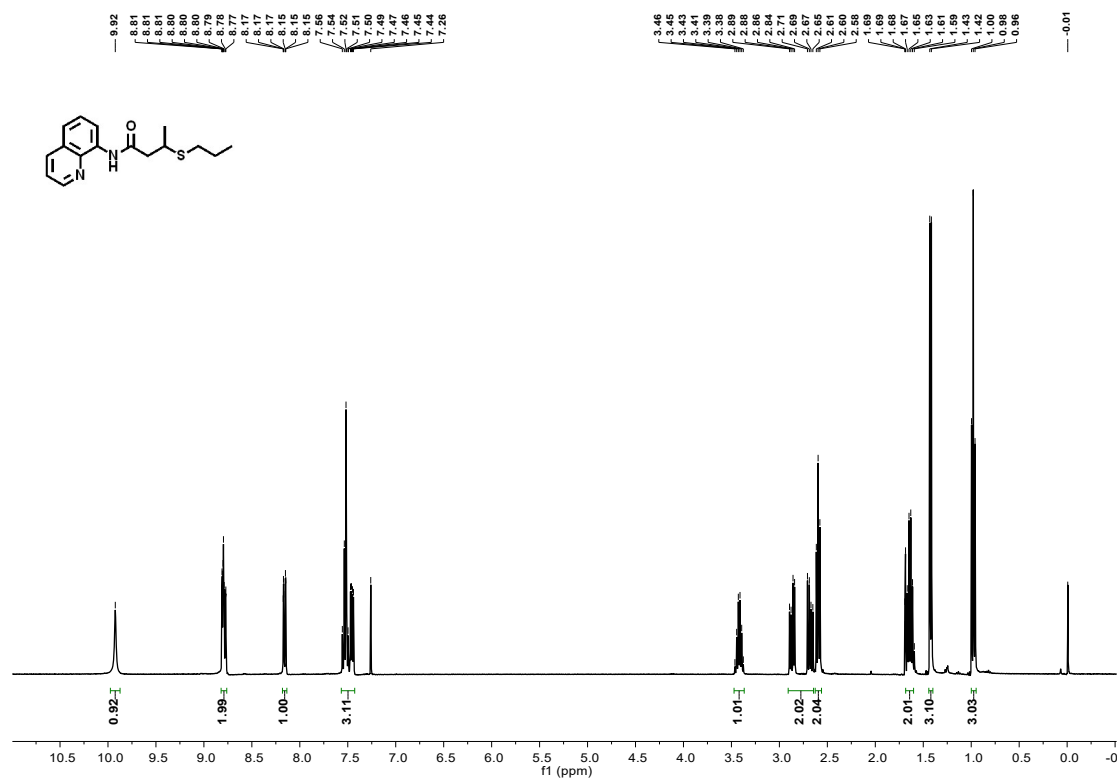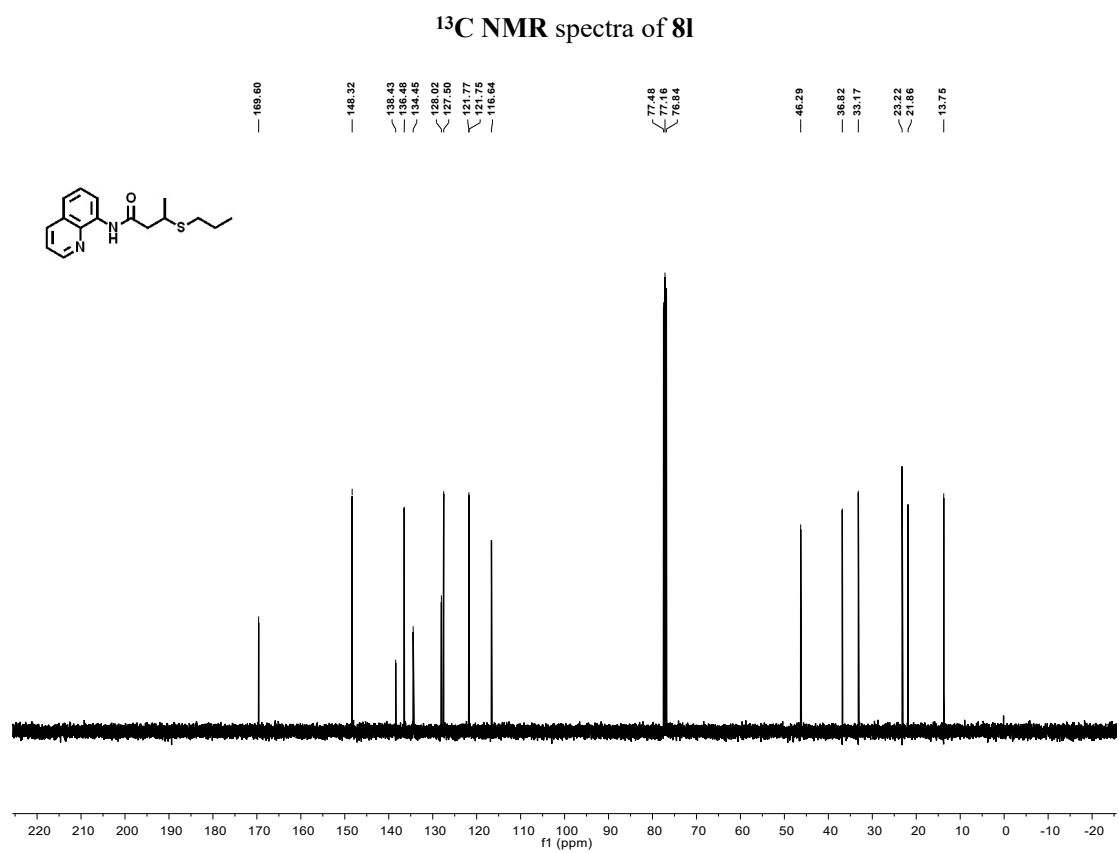

**<sup>1</sup>H NMR spectra of 8m**

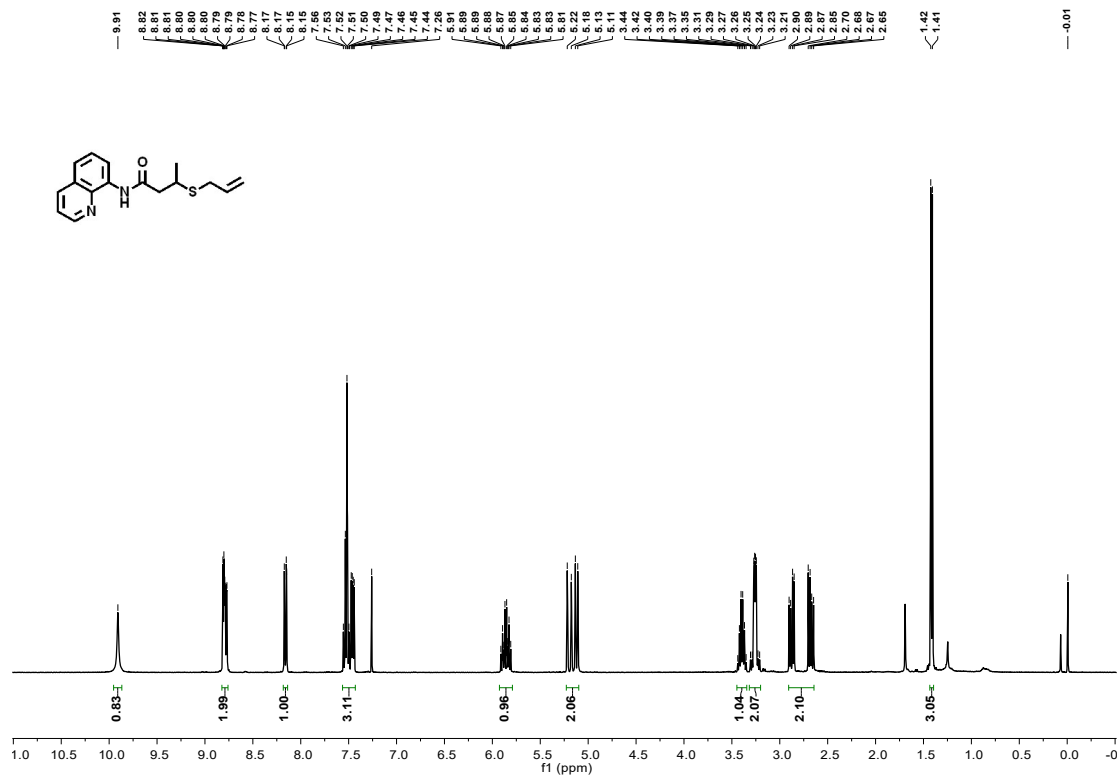

<sup>13</sup>C NMR spectra of 8m

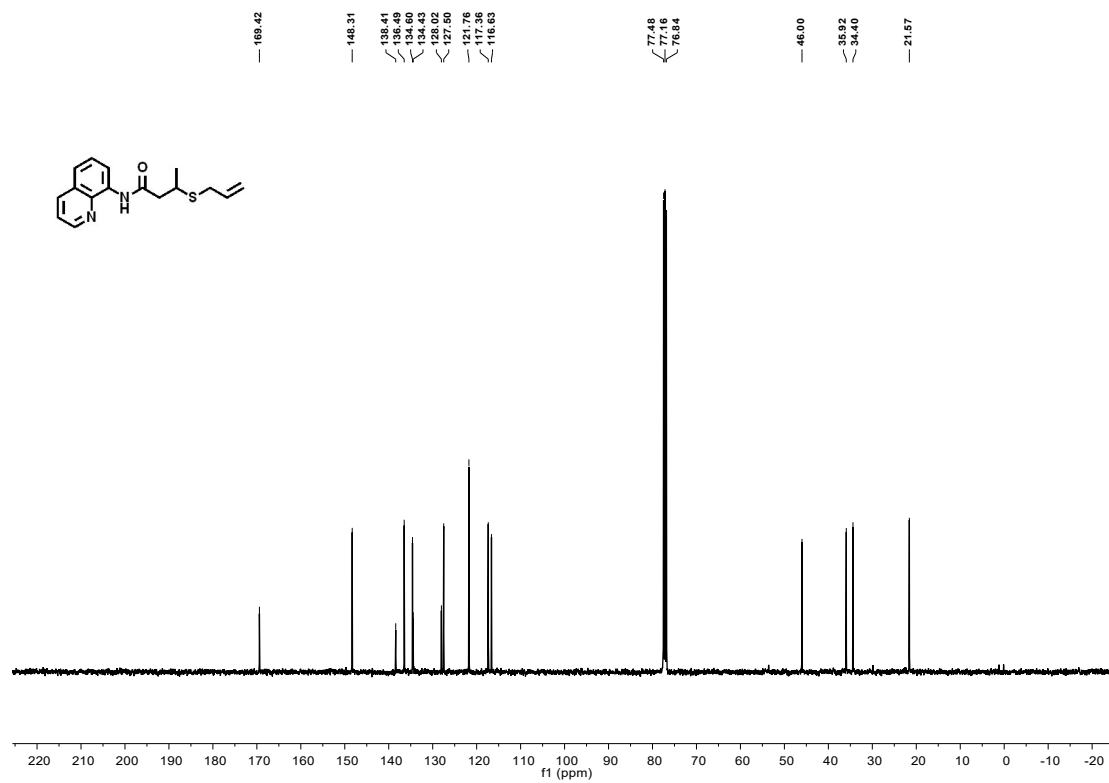

<sup>1</sup>H NMR spectra of 8n

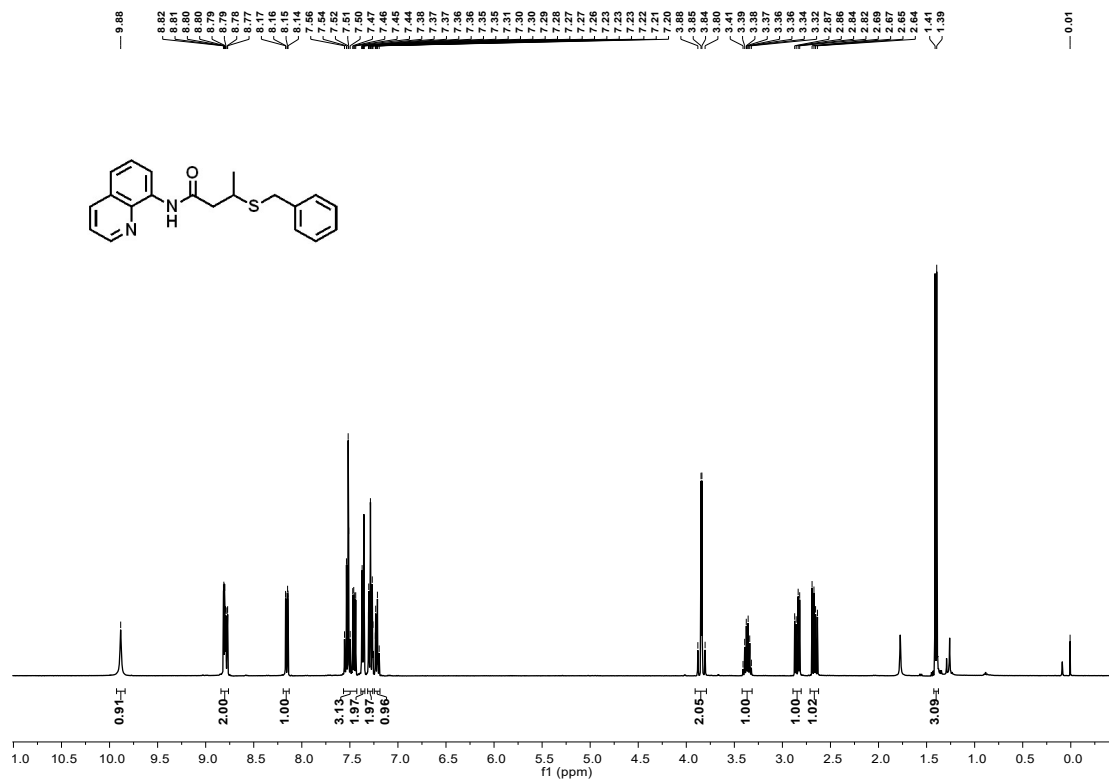

**<sup>13</sup>C NMR spectra of 8n**

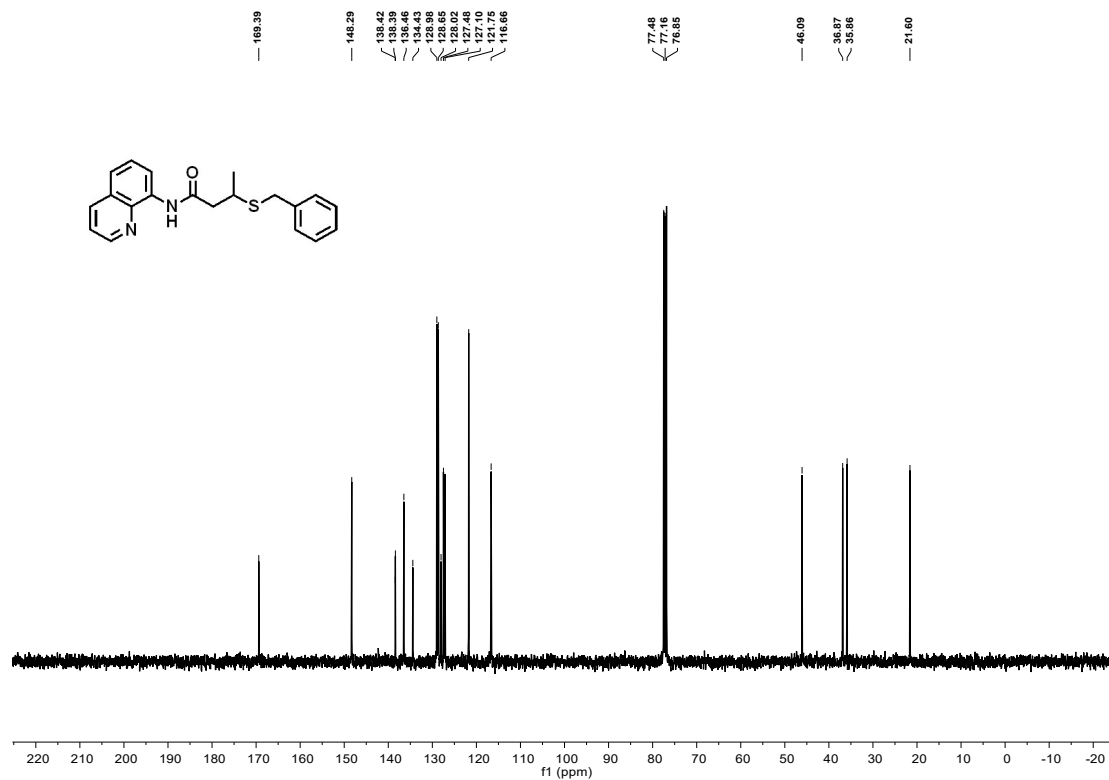

**<sup>1</sup>H NMR spectra of 8o**

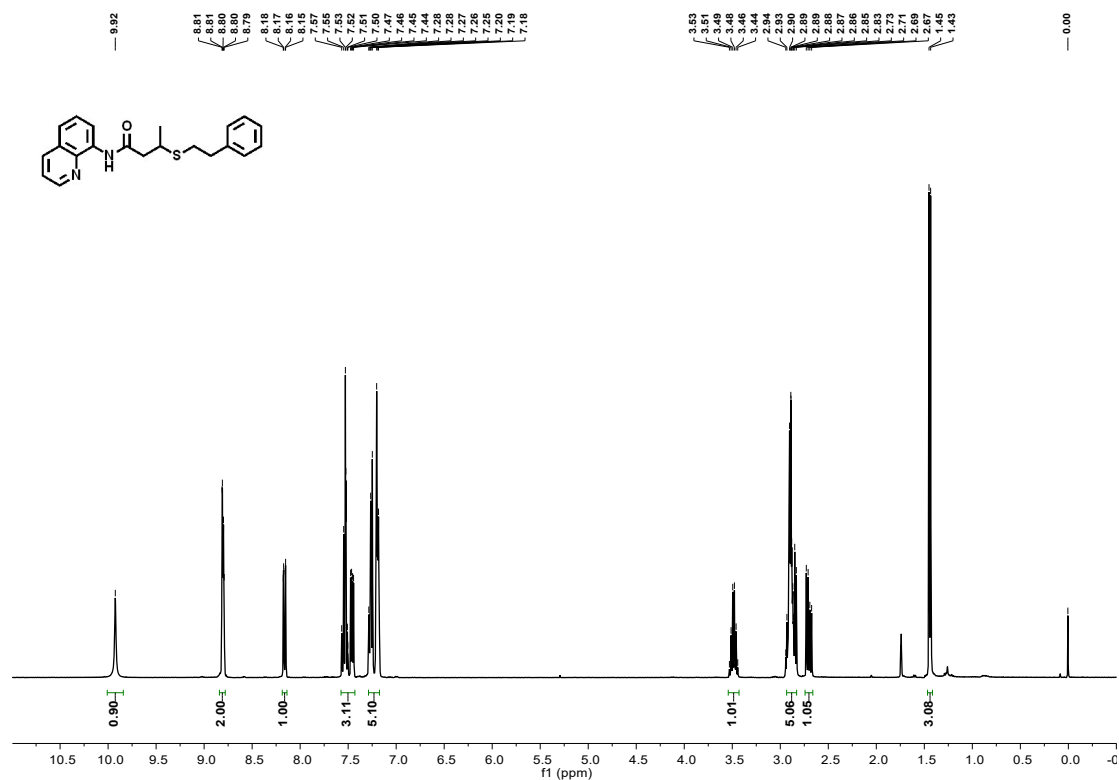

**<sup>13</sup>C NMR spectra of 8o**

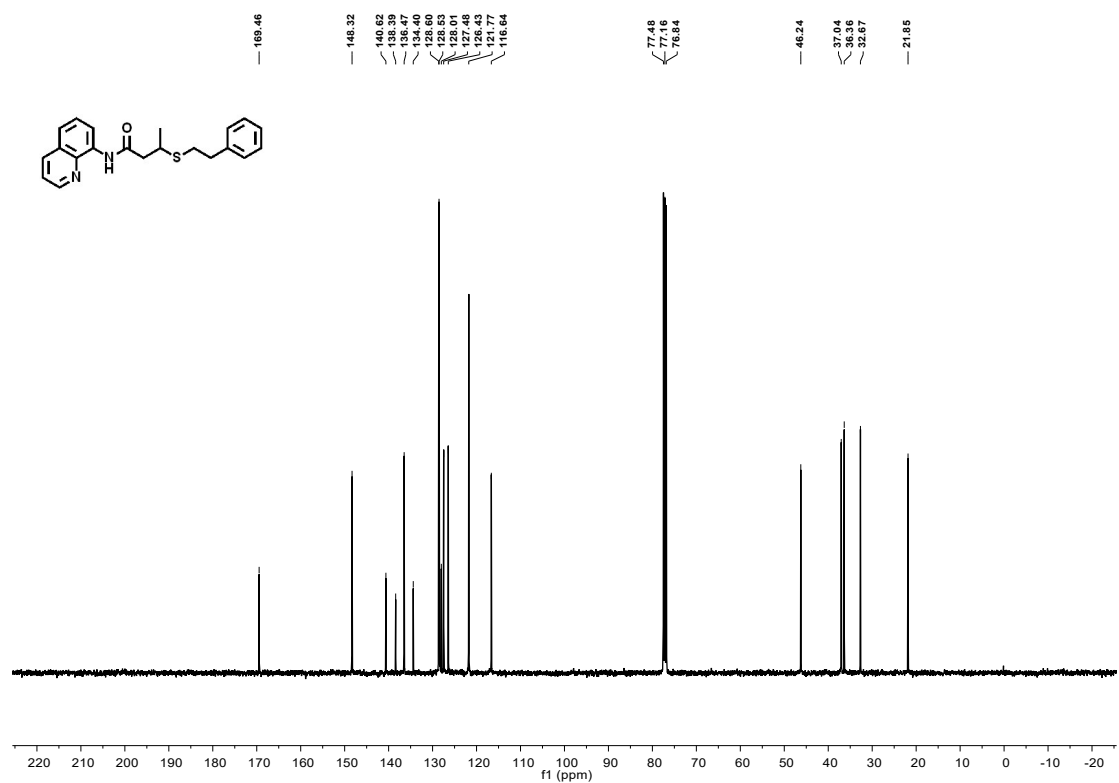

**<sup>1</sup>H NMR spectra of 9a**

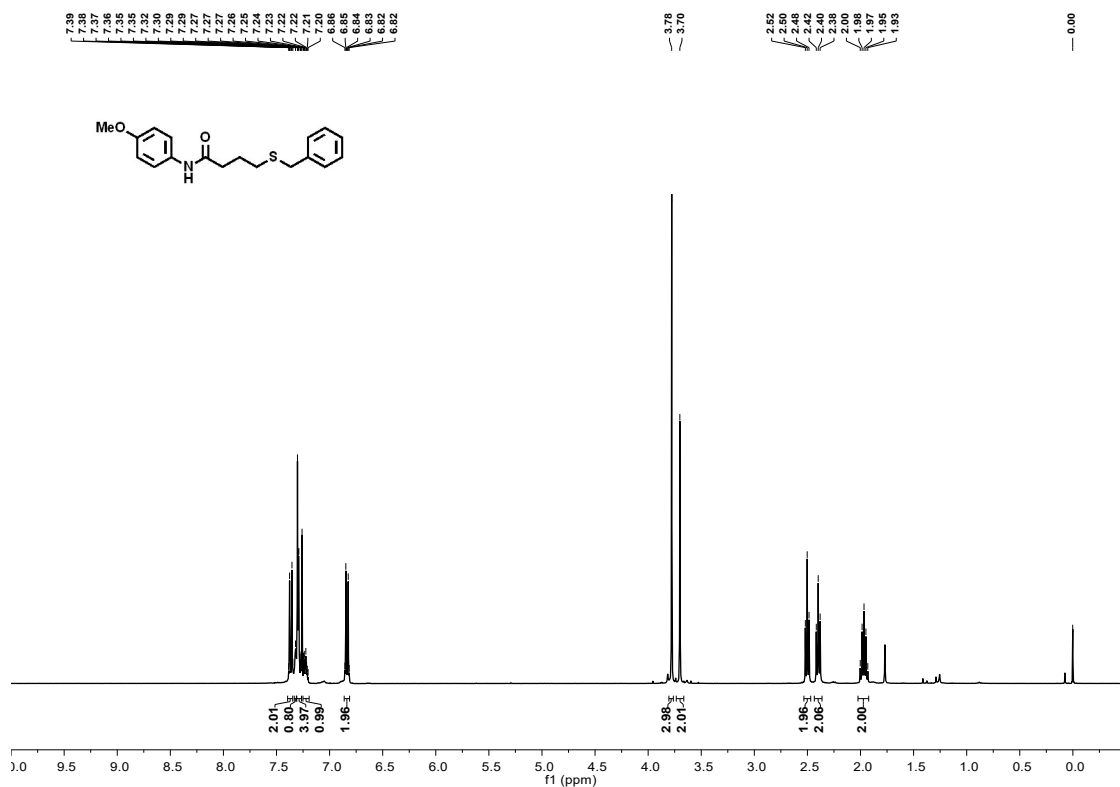

**<sup>13</sup>C NMR spectra of 9a**

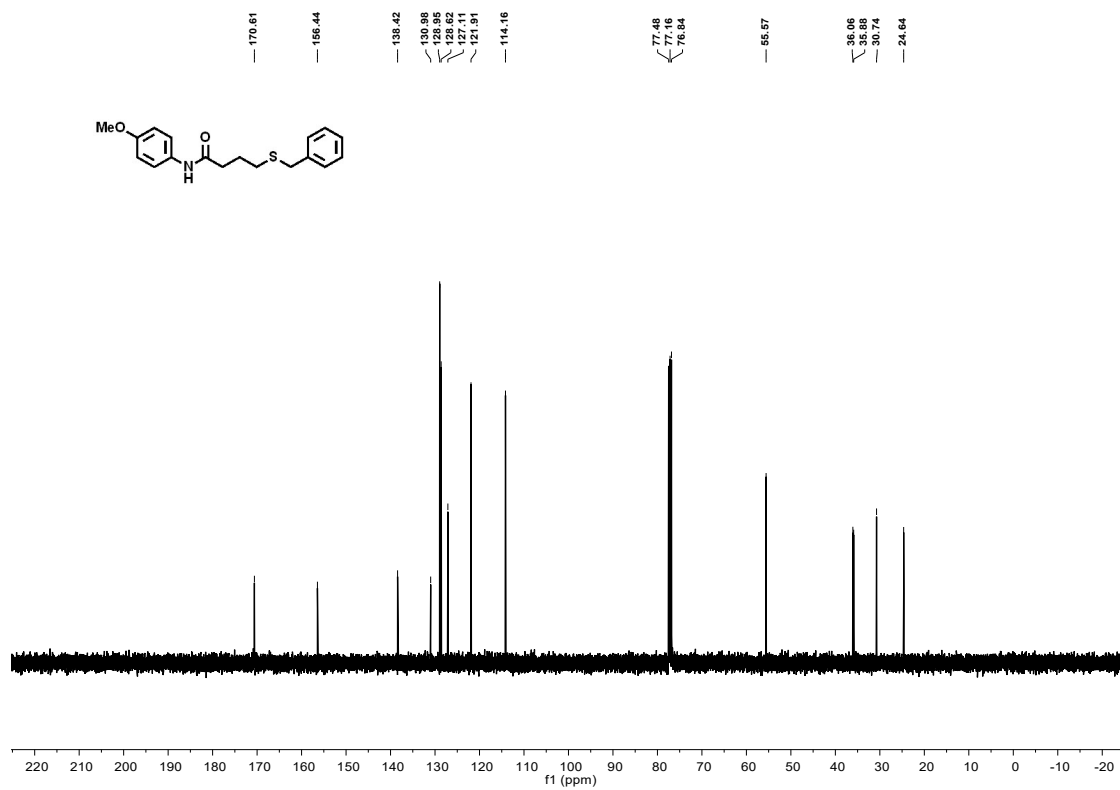

**<sup>1</sup>H NMR spectra of 9b**



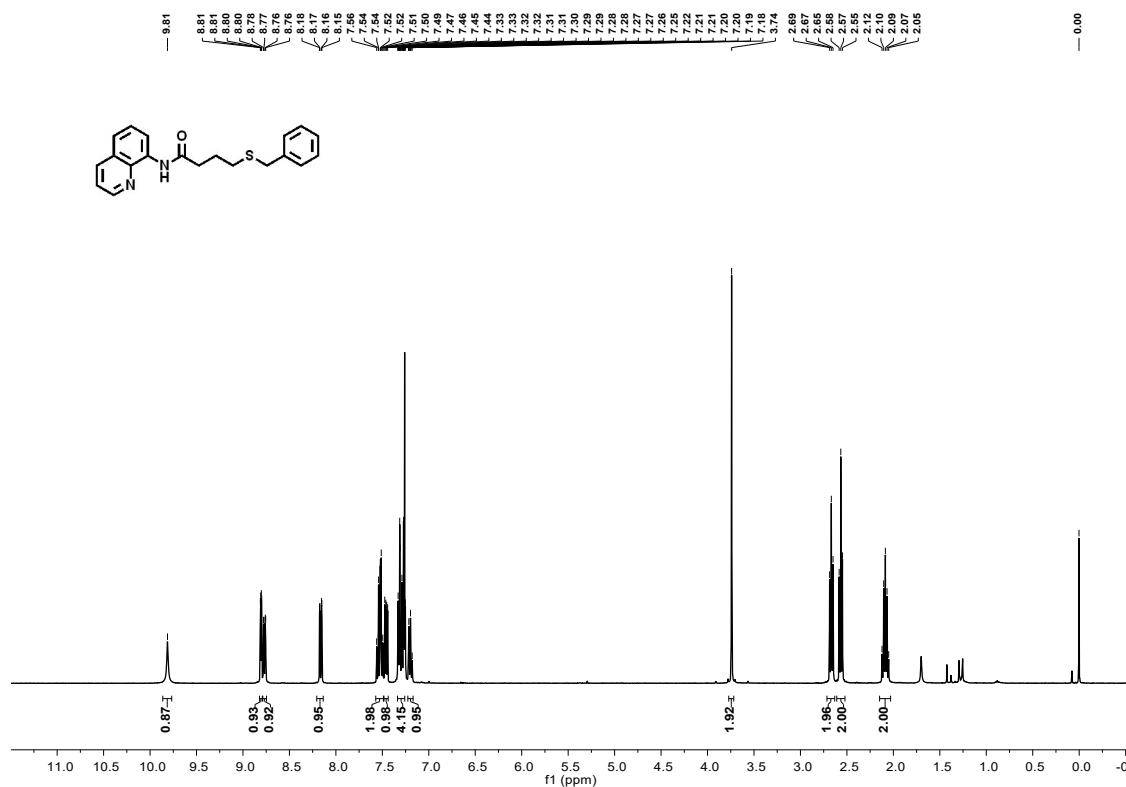

**<sup>13</sup>C NMR spectra of 9b**

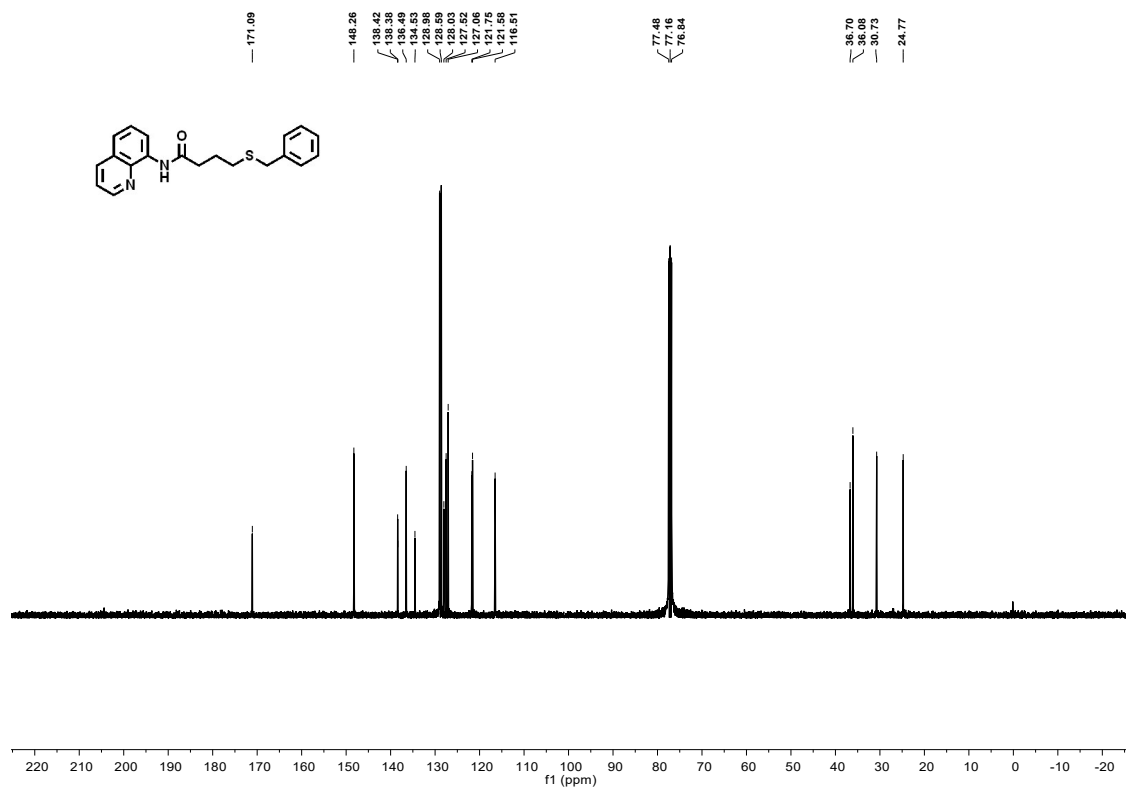

**<sup>1</sup>H NMR spectra of 9c**

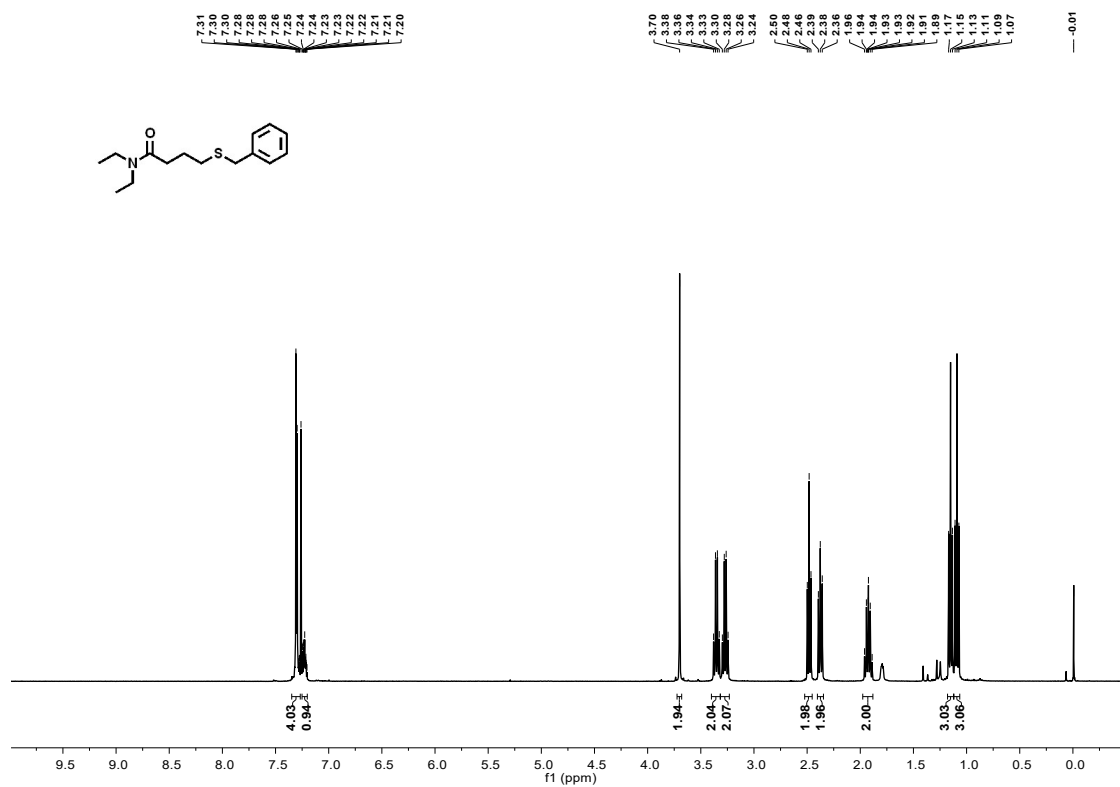

<sup>13</sup>C NMR spectra of 9c

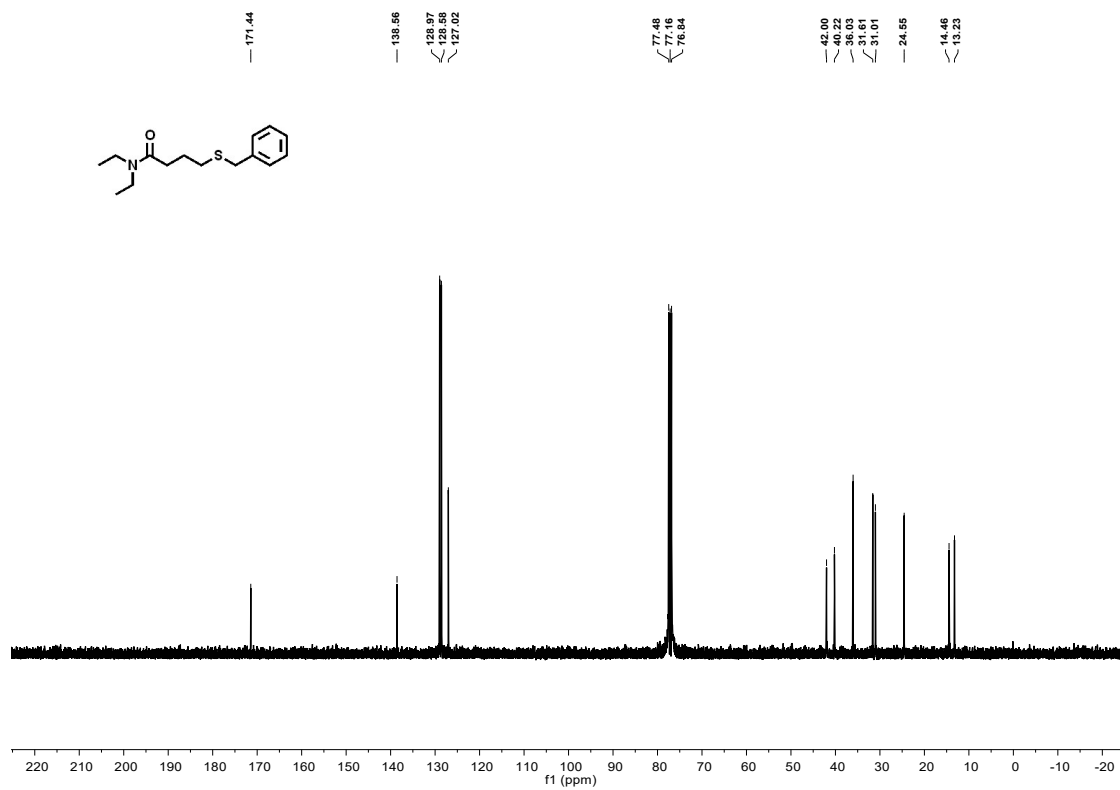

<sup>1</sup>H NMR spectra of 9d

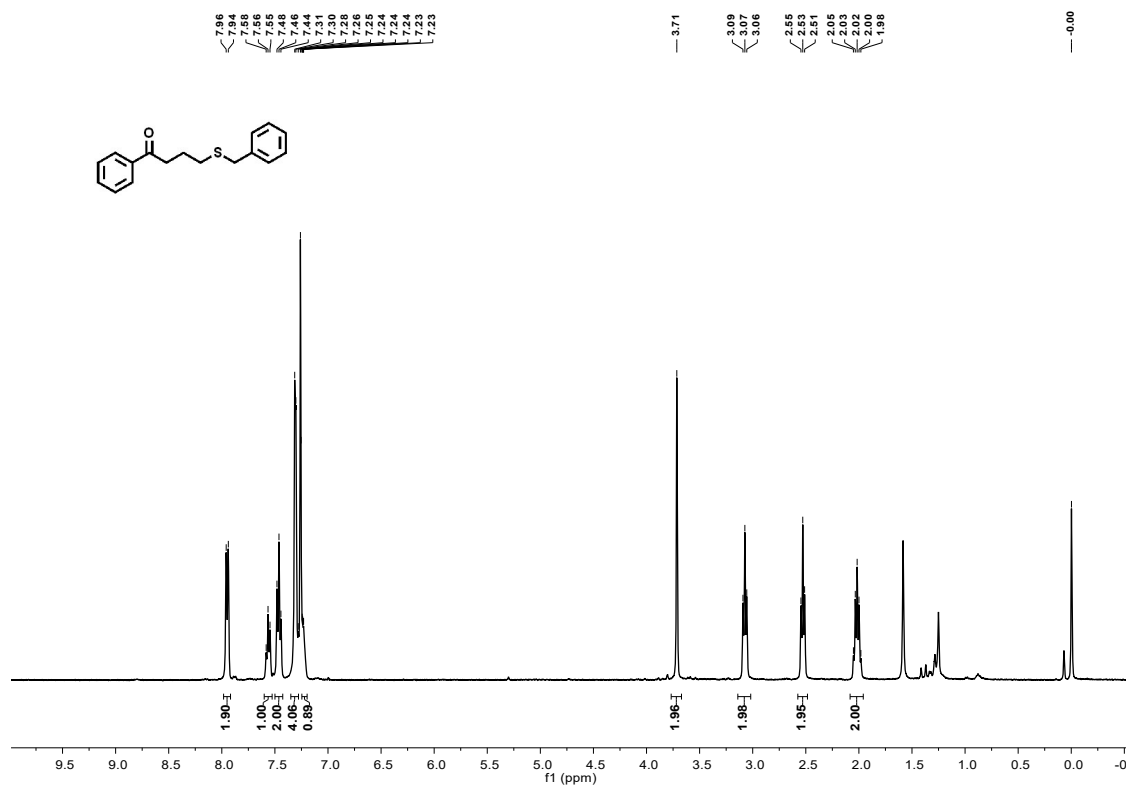

$^{13}\text{C}$  NMR spectra of 9d

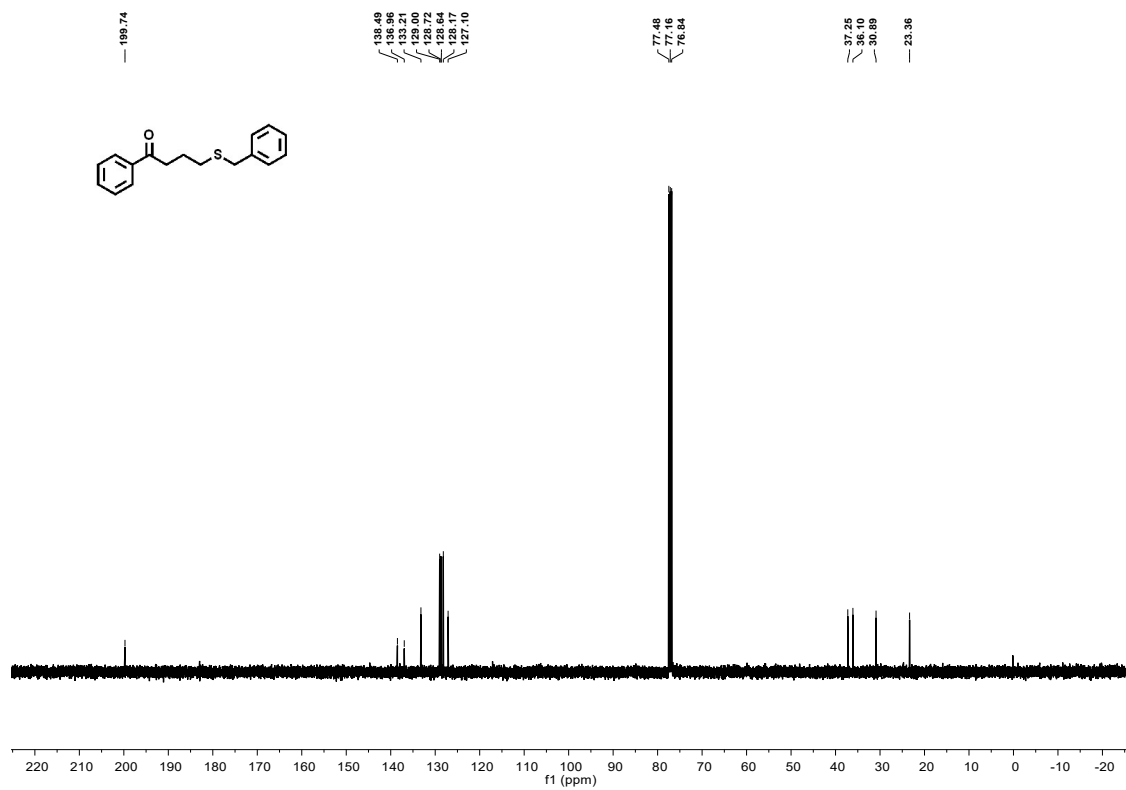

$^1\text{H}$  NMR spectra of 9e

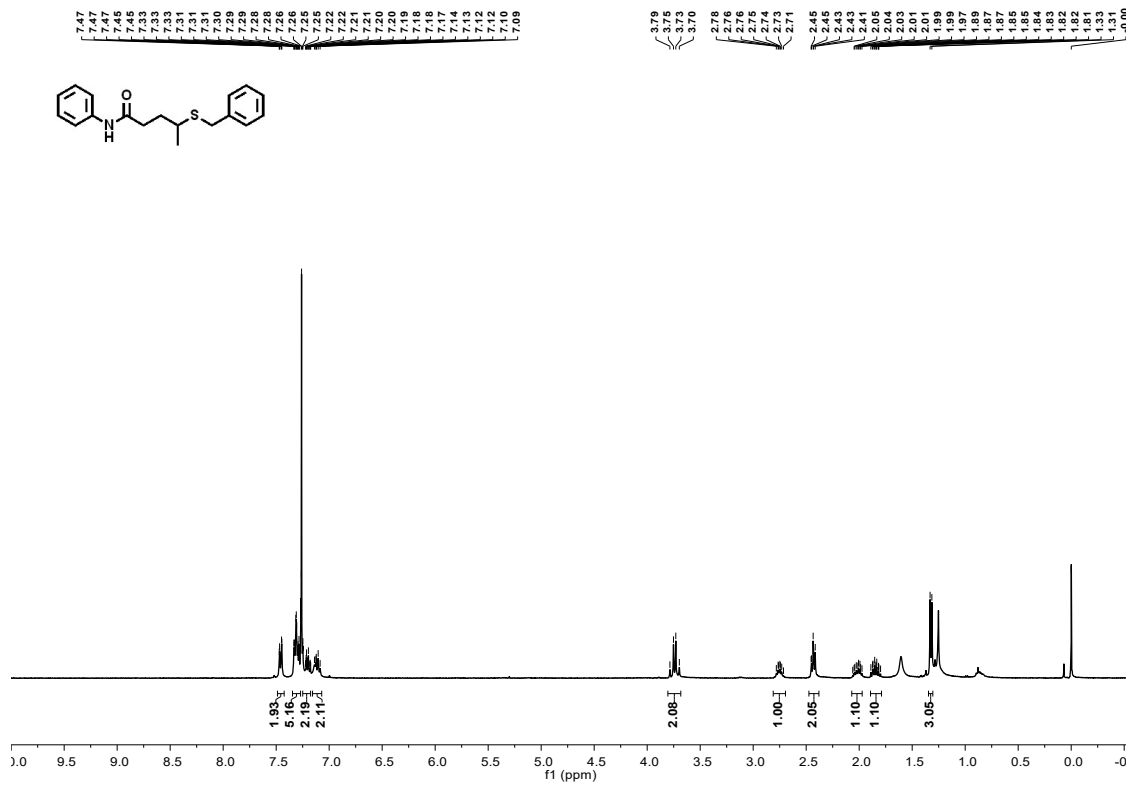

**<sup>13</sup>C NMR spectra of 9e**

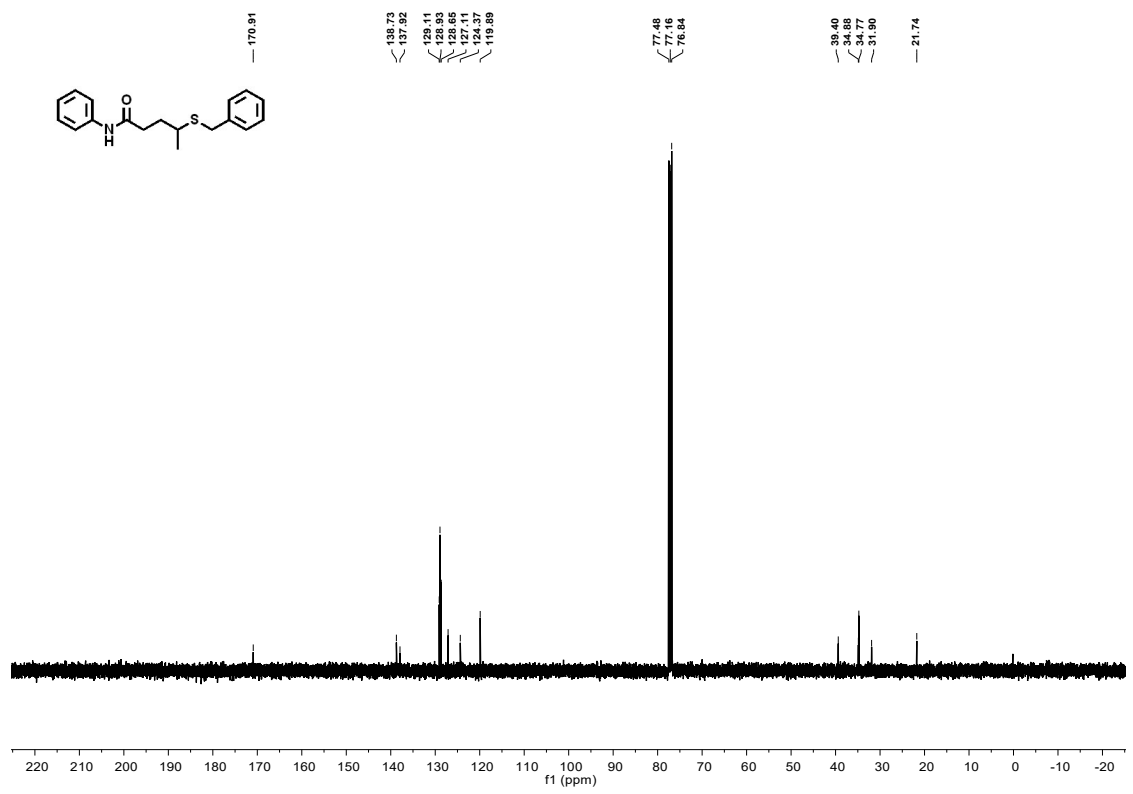

**<sup>1</sup>H NMR spectra of 9f**

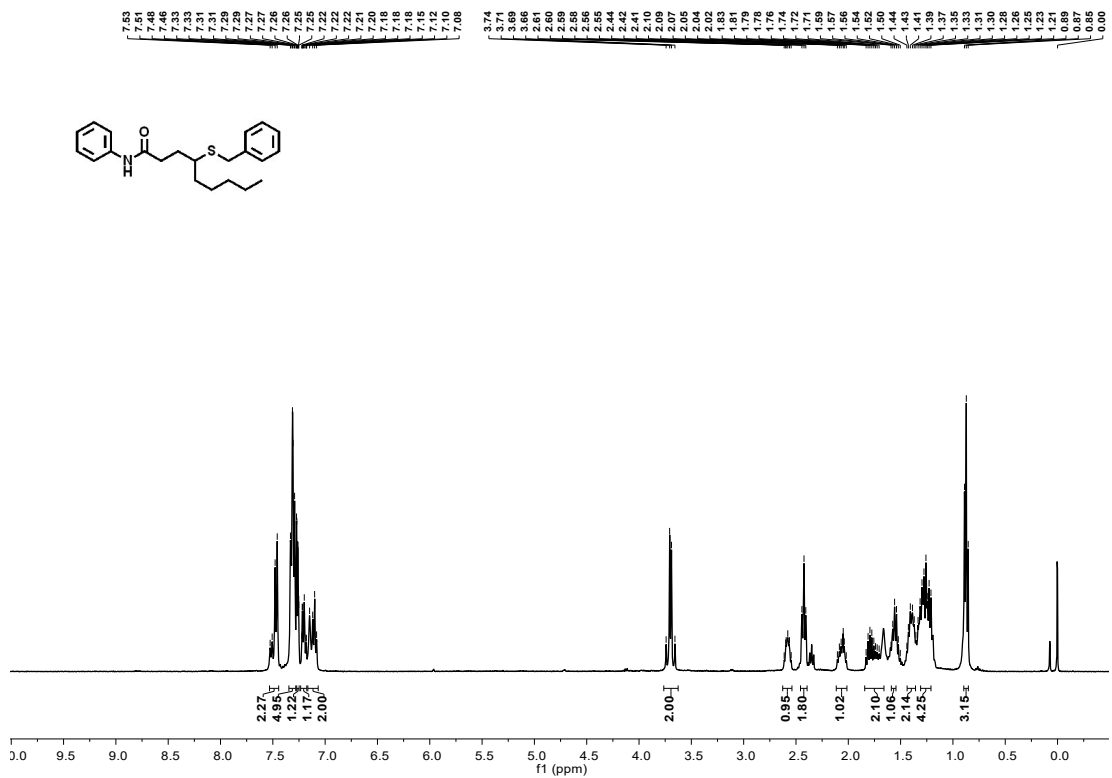

<sup>13</sup>C NMR spectra of **9f**

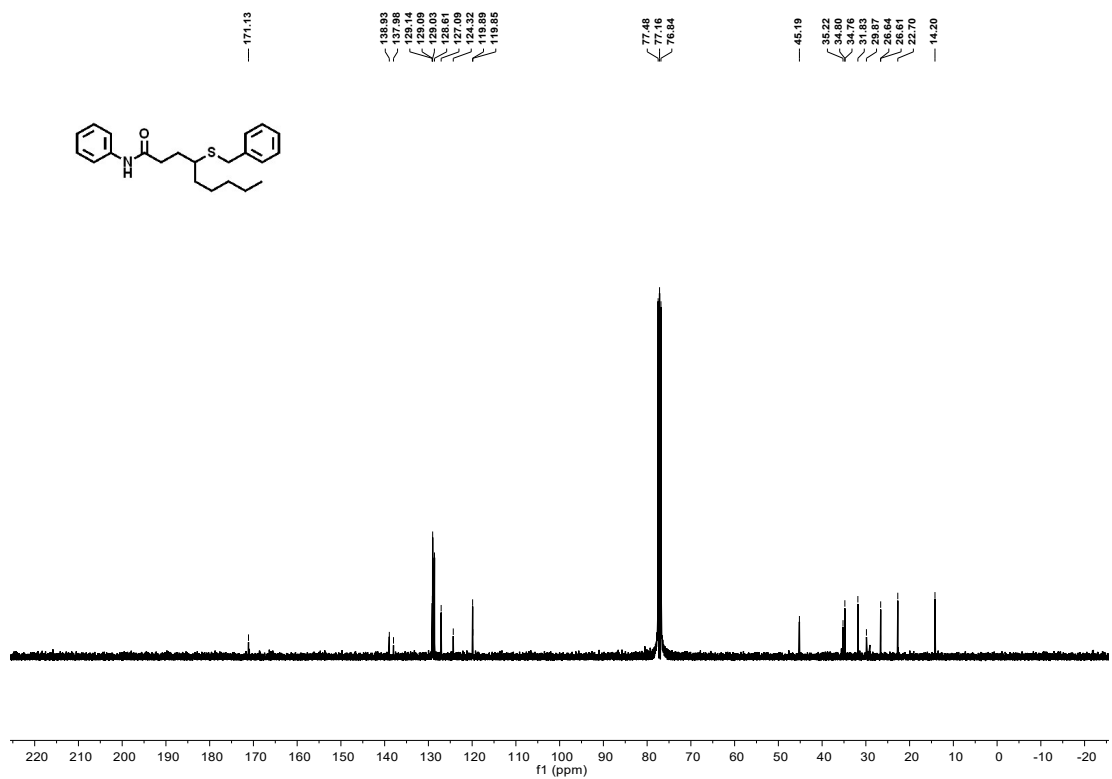

<sup>13</sup>C NMR spectra of **9g**

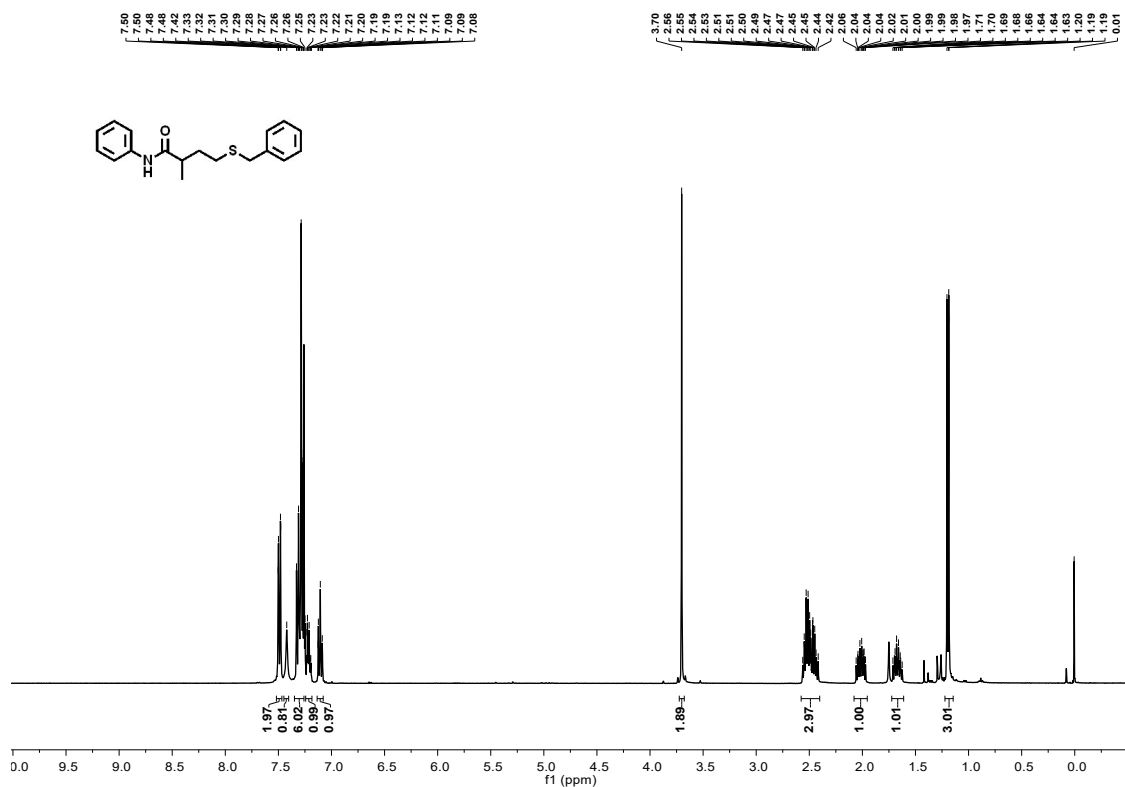

**<sup>13</sup>C NMR spectra of 9g**

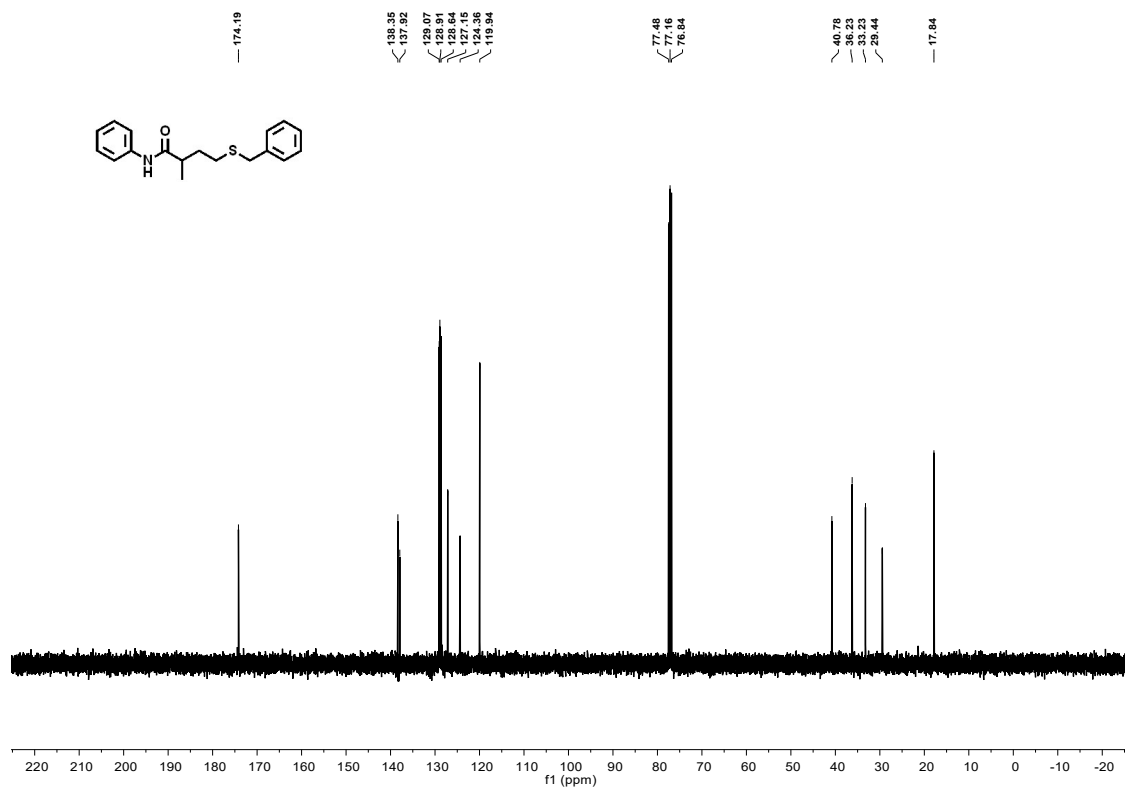

**<sup>1</sup>H NMR spectra of 9h**

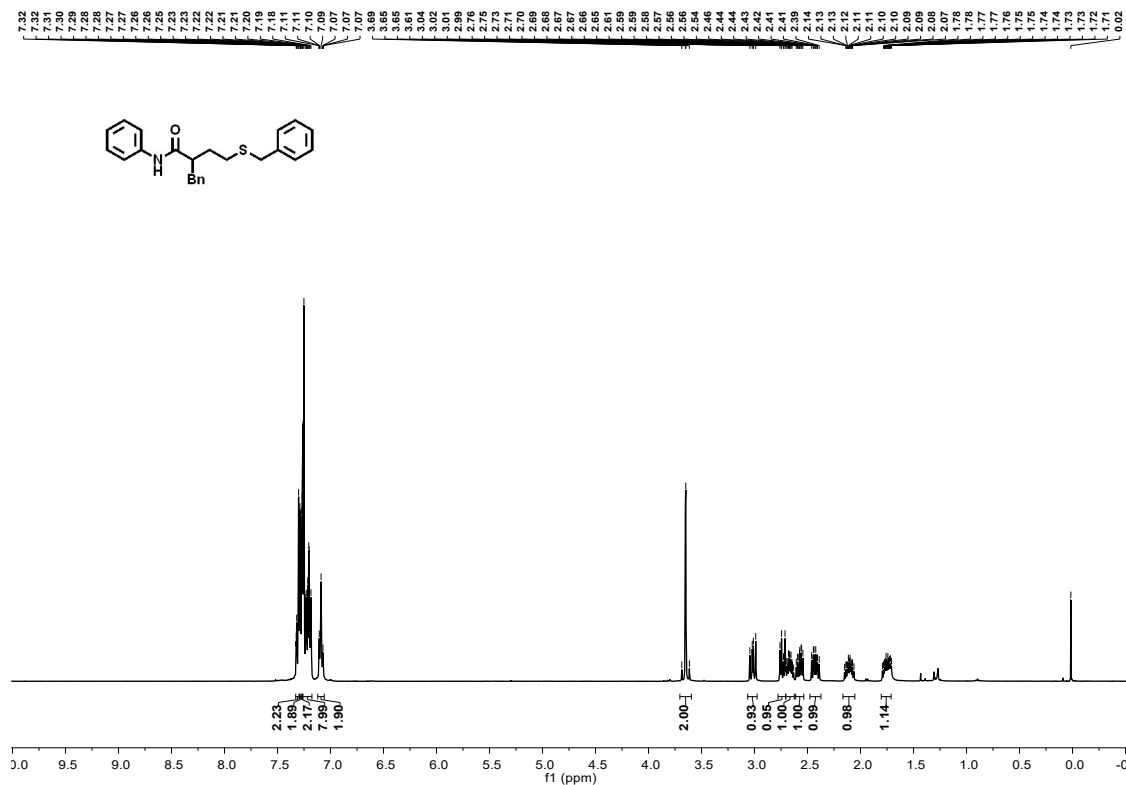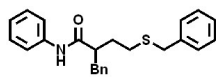

<sup>13</sup>C NMR spectra of 9h

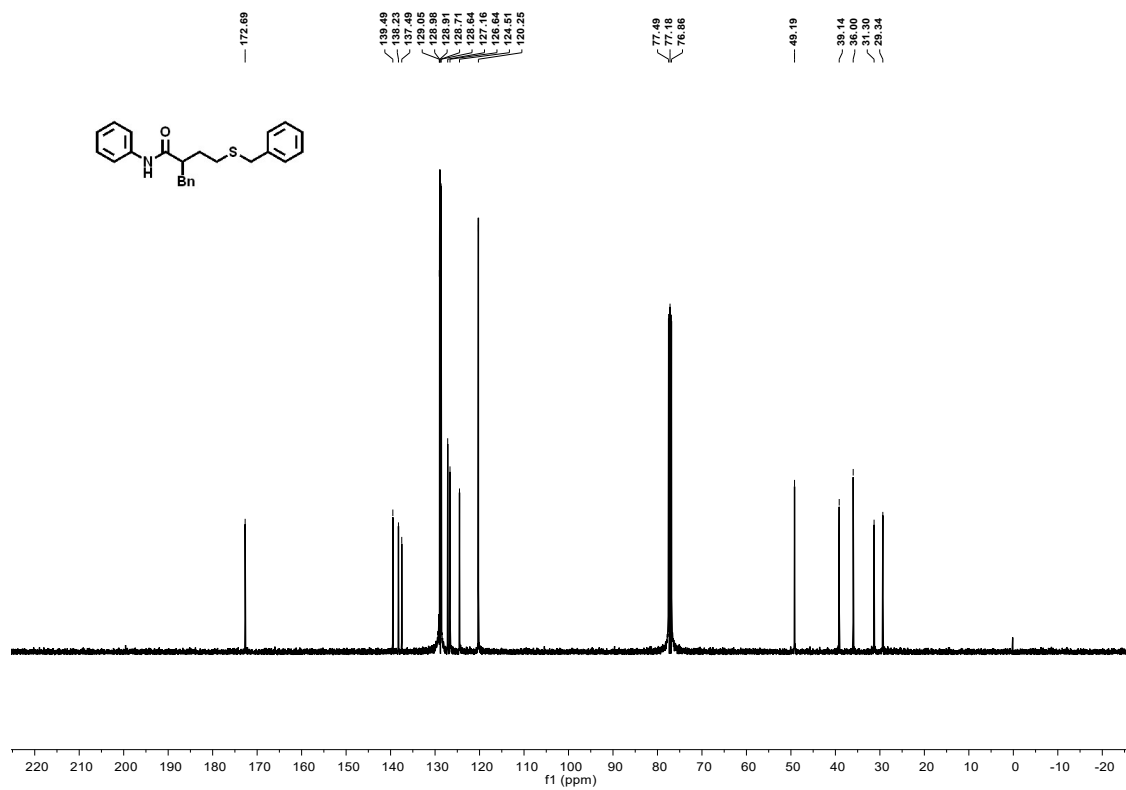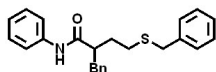

<sup>1</sup>H NMR spectra of 9i

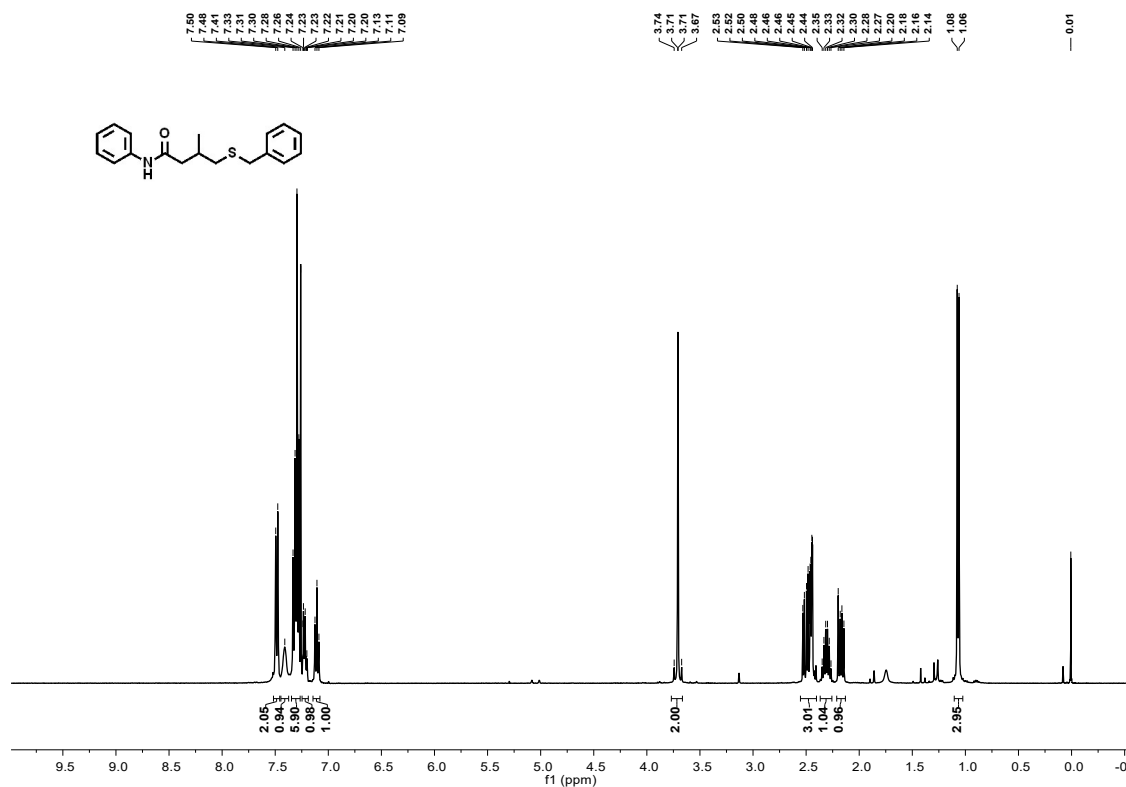

<sup>13</sup>C NMR spectra of 9i

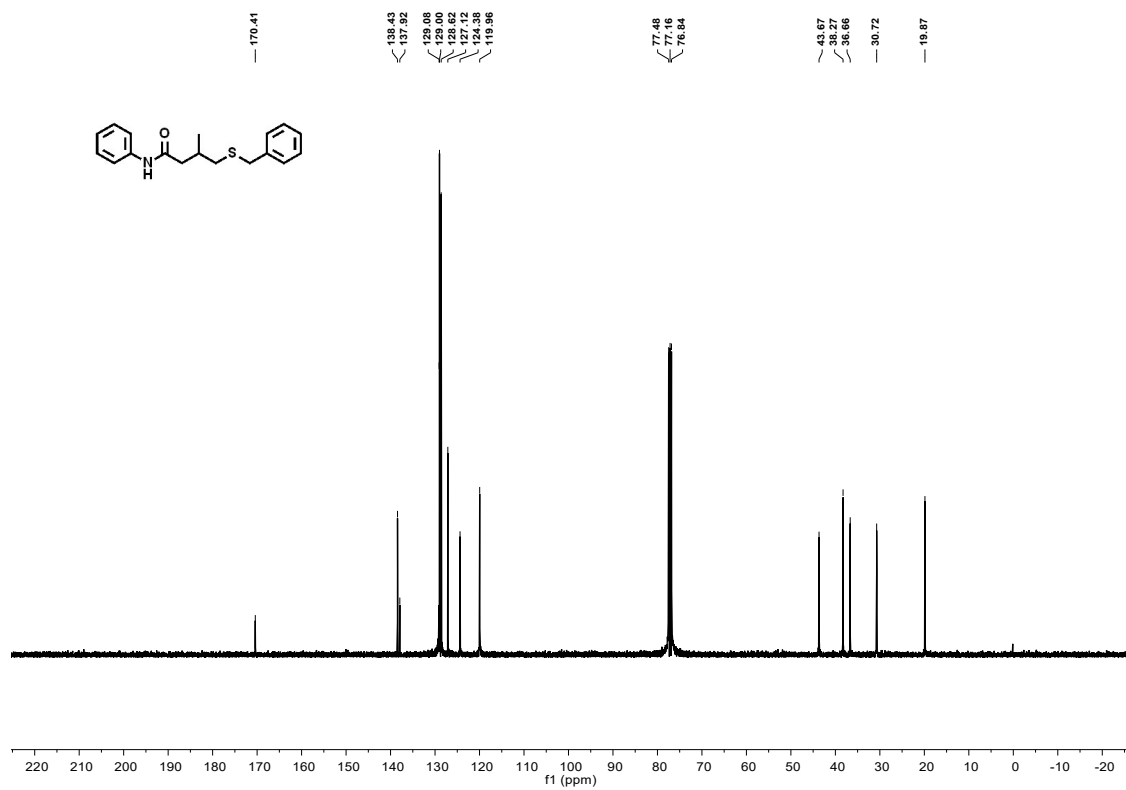

<sup>1</sup>H NMR spectra of 9j



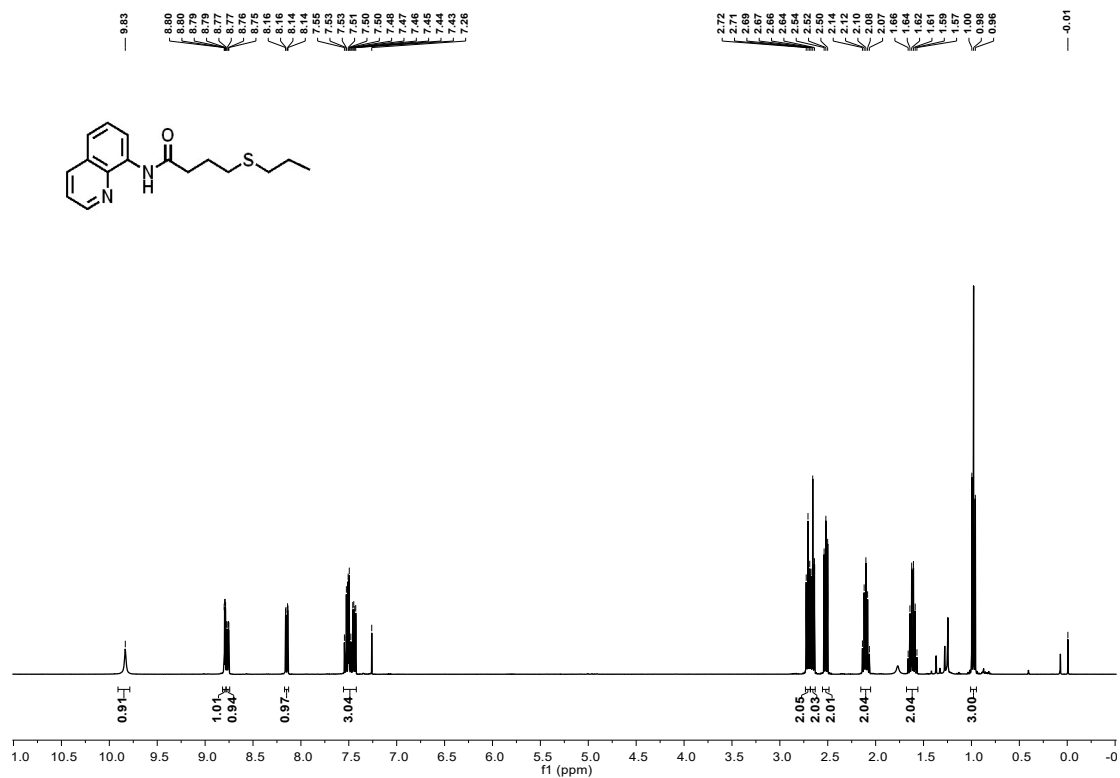

**<sup>13</sup>C NMR spectra of 9j**

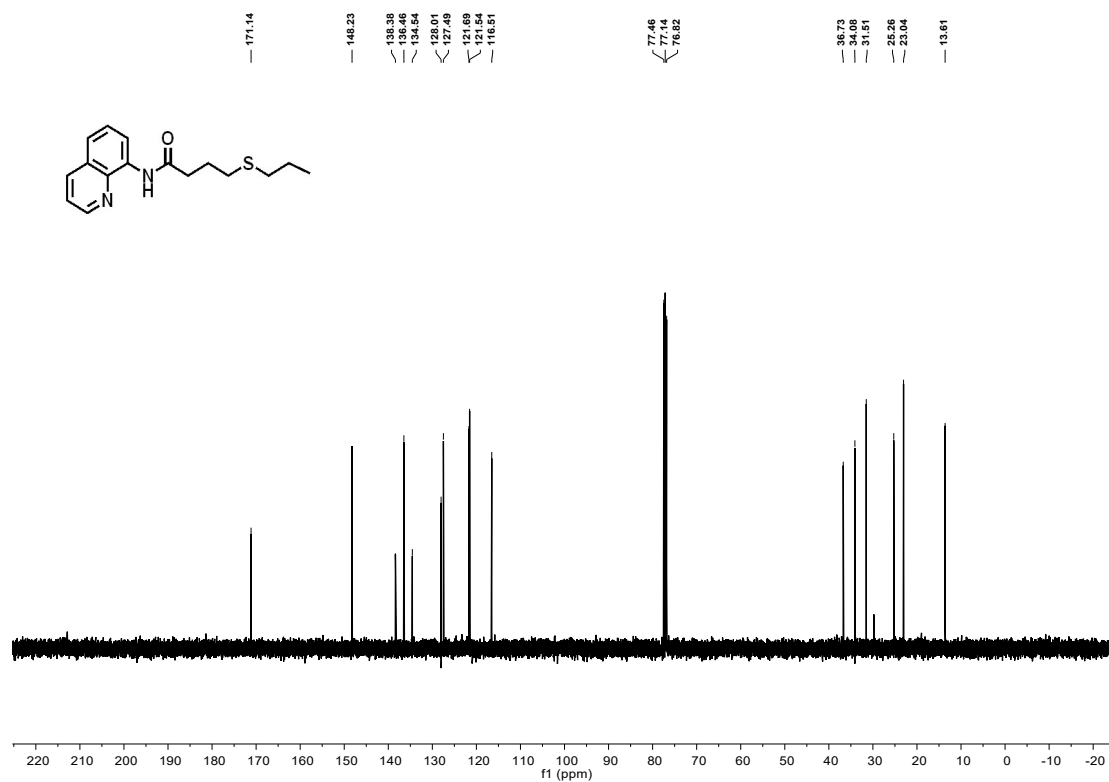

**<sup>1</sup>H NMR spectra of 9k**

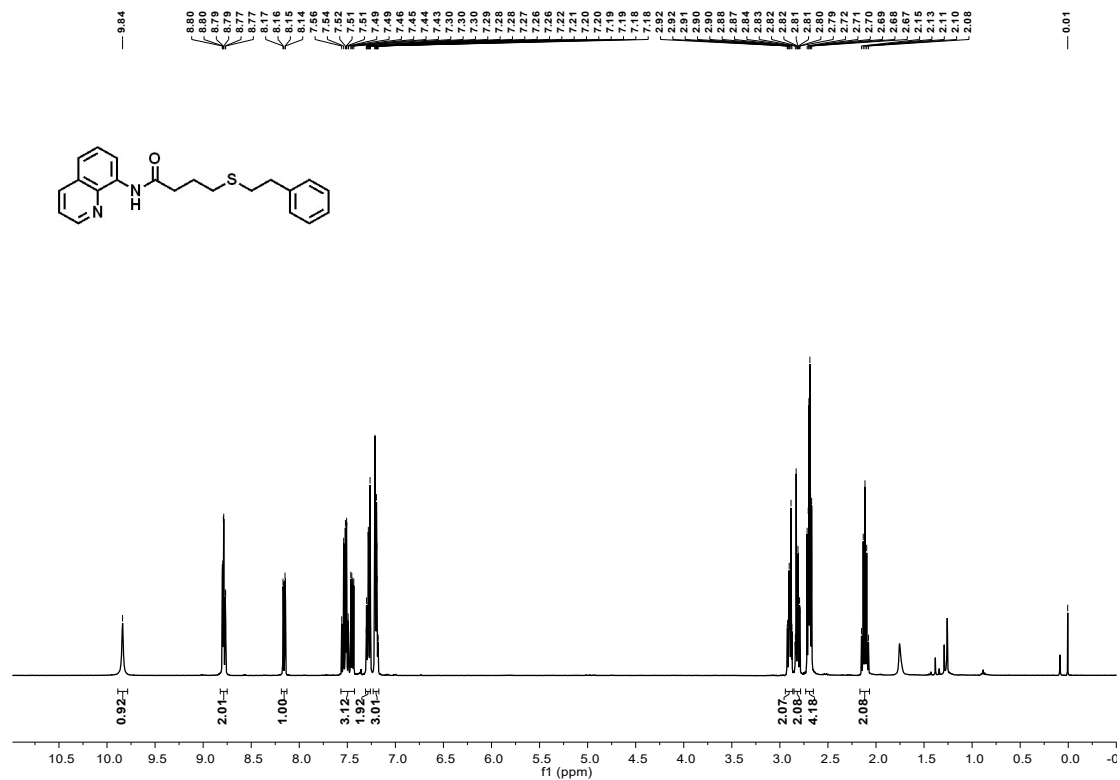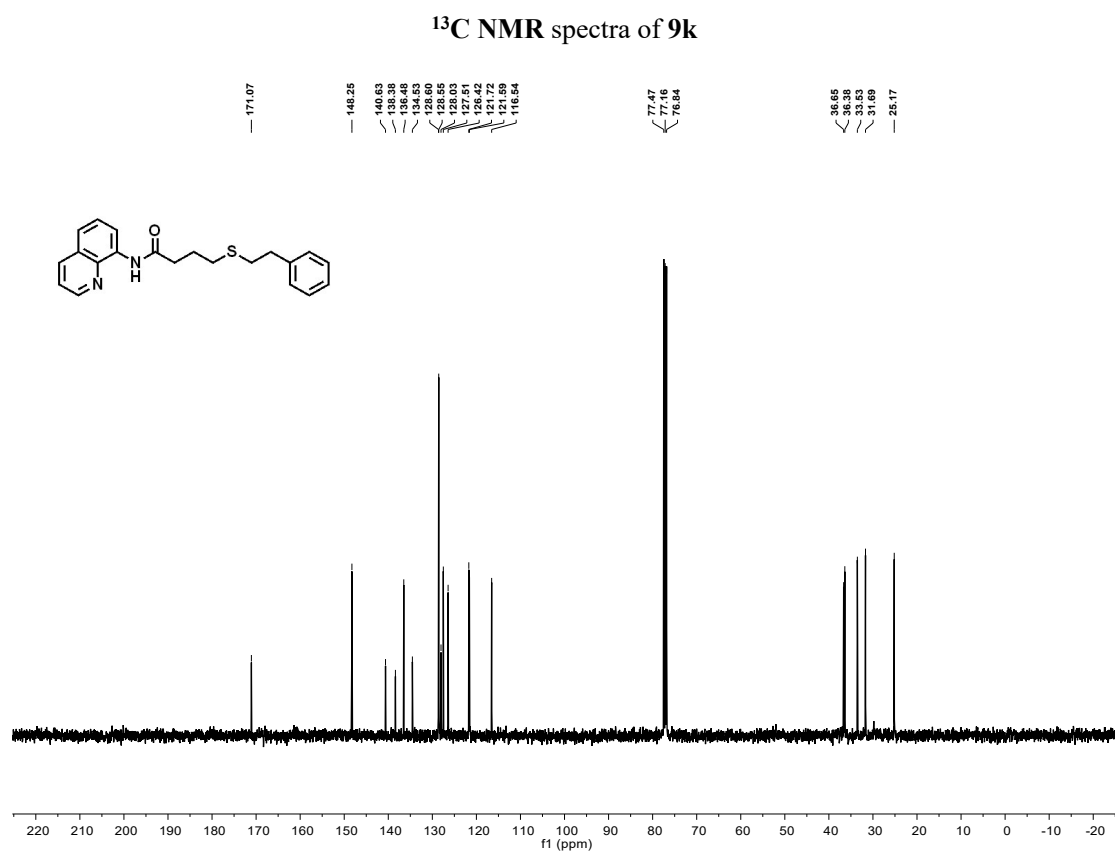

<sup>1</sup>H NMR spectra of 9l

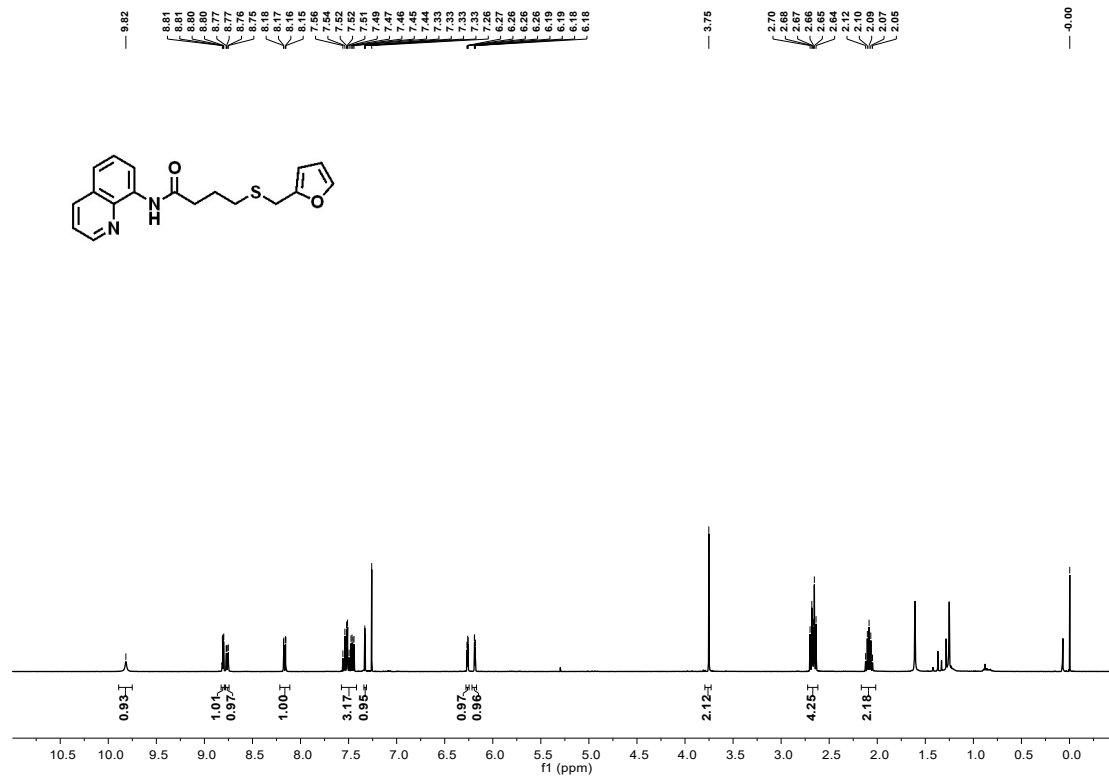

$^{13}\text{C}$  NMR spectra of **91**

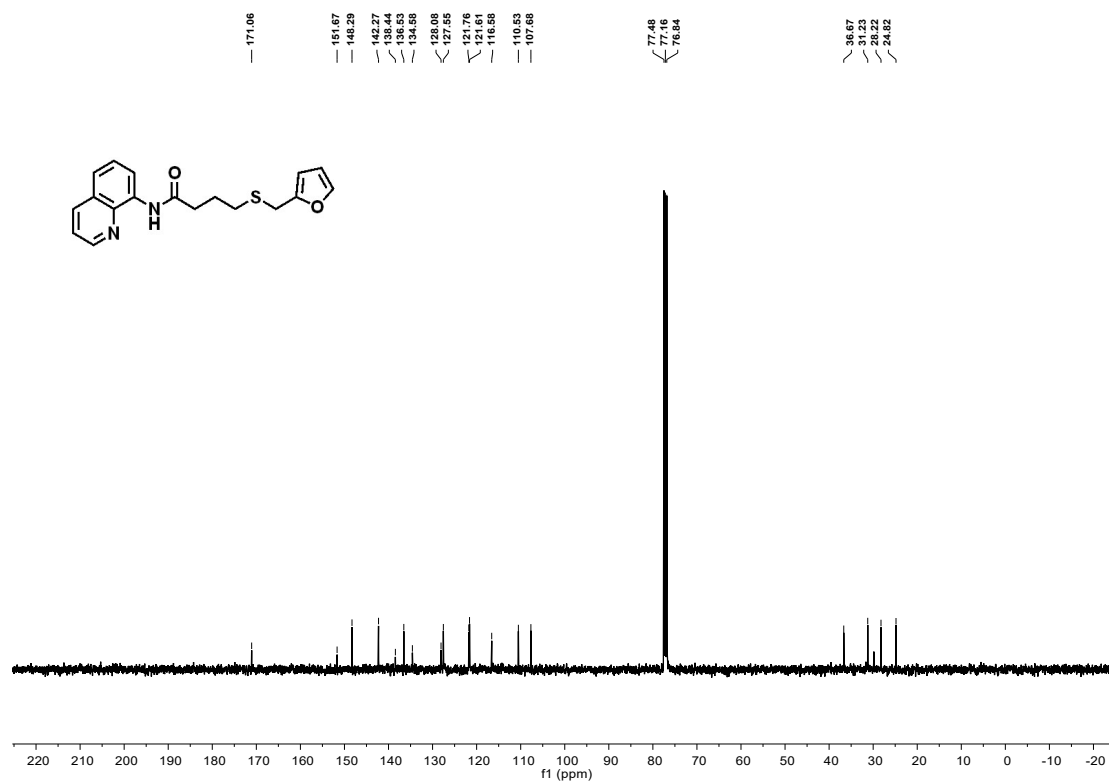

$^1\text{H}$  NMR spectra of **10a**

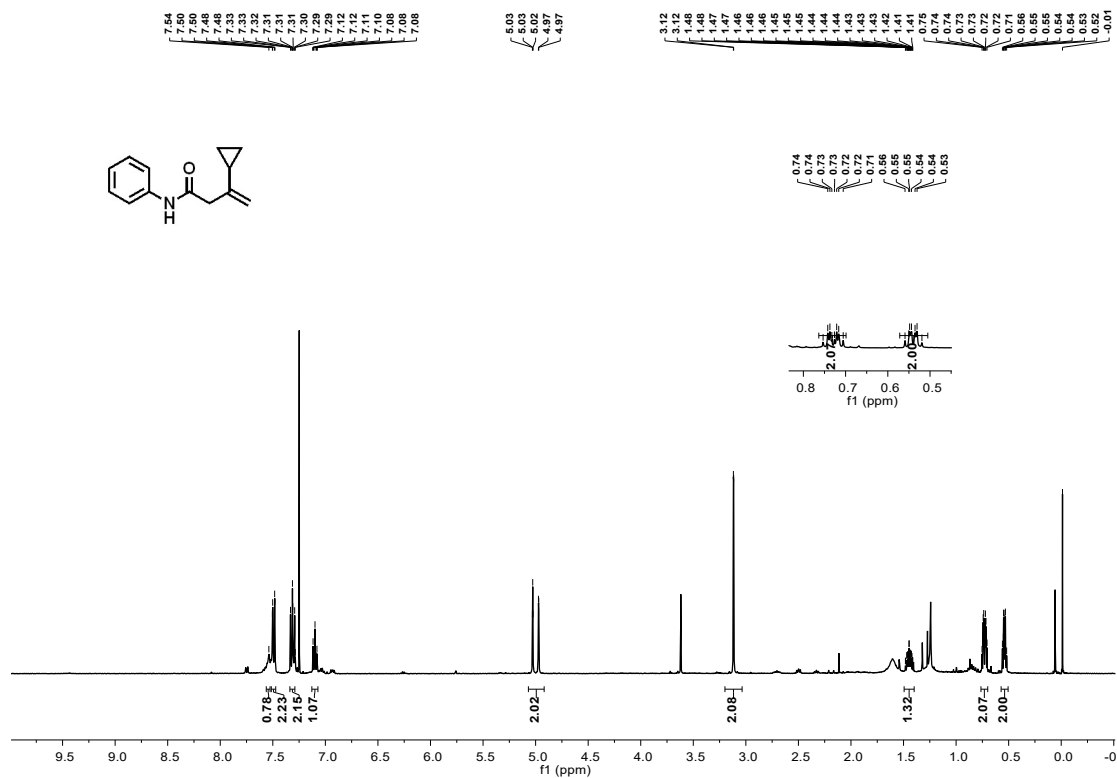

<sup>1</sup>H NMR spectra of 10b

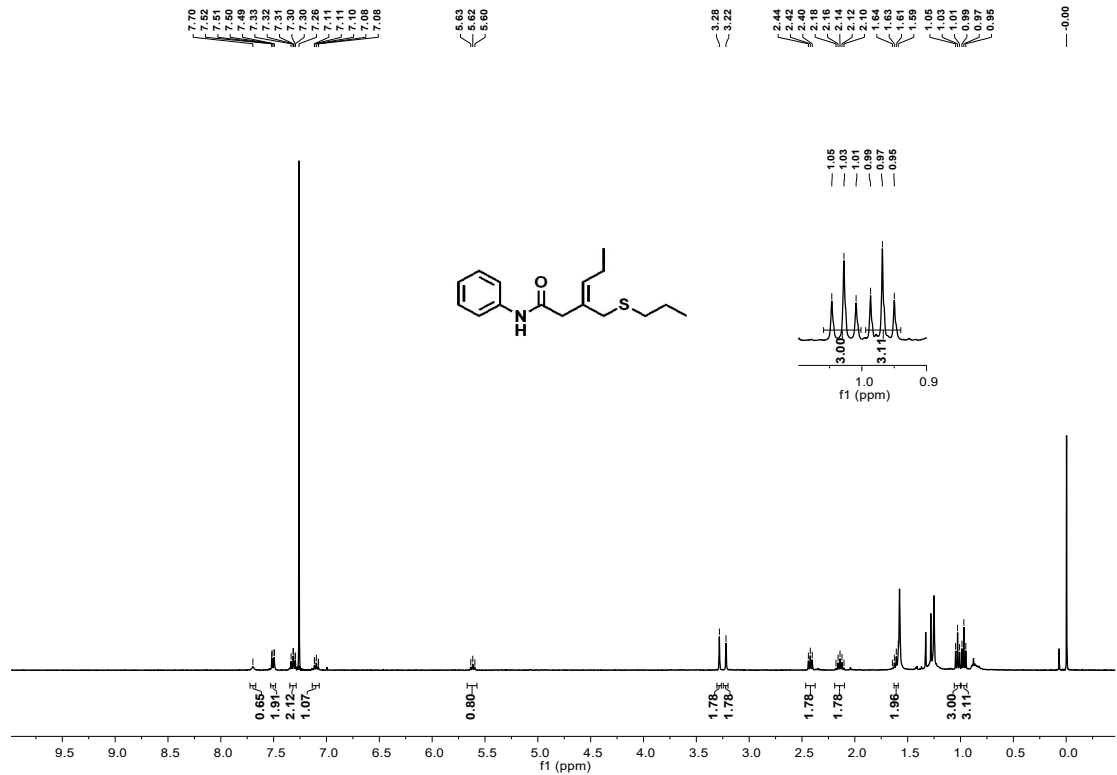

Supplement: d1cc03440e1.pdf [file d1cc03440e1.pdf]
